# Supplementary material for: Two neuropeptides that promote blood feeding in Anopheles stephensi mosquitoes
Source: bioRxiv preprint, doi:10.1101/2024.05.15.594342, version 6 (2026-02-19)
Supplement: Supp sheet2_RNAseq data [file 594342_file03.xlsx]

## Sheet: Metadata
This file includes transcript abundance (in units of Trancript per million; TPM) data for all the samples analyzed (7 biological conditions with 3 replicates (R1-R3) each)
Sheet 1. TPM values of transcripts expressed in the central brain, mapped to genes with isoform information retained. Raw FastQ files were mapped to the reference An. stephensi transcriptome and gene expression levels were quantified as TPM values using Kallisto. Transcript isoform information was preserved during gene mapping, so different isoforms of the same gene are recorded as separate entri…
Sheet 2. Gene-level TPM expression values in central brain. Raw FastQ files were mapped to the reference An. stephensi transcriptome and quantified as TPM values using Kallisto. Multiple isoforms were collapsed to single gene entries for gene-level summarisation. This sheet contains TPM values for all samples, which were then filtered (see methods) and log10-transformed for visualisation as heatm…
Sheet 3. TPM expression values of 71 candidates potentially involved in promoting blood-feeding behaviour. These genes were identified to be commonly upregulated in various "blood-hungry" states, as compared to state of "no-interest" or "blood-satiety", and non-overlapping in males. Post-log10 transformation, these values were plotted as a heatmap in supplementary figure S7.
Sheet 4. Gene-level TPM expression values in ovary, midgut and fat body. Raw FastQ files for RNAseq data of ovary, midgut and fat body, dissected from glucose-fed, 2-4days old females were obtained from Prasad et al. (2017). These were mapped to the reference An. stephensi transcriptome and quantified as TPM values using Kallisto. Multiple isoforms were collapsed to single gene entries for gene-l…
Samples:	Physiological conditions
D0_males_R1	0-7h old; uninterested in blood
D0_males_R2	0-7h old; uninterested in blood
D0_males_R3	0-7h old; uninterested in blood
D0_females_R1	0-7h old; uninterested in blood
D0_females_R2	0-7h old; uninterested in blood
D0_females_R3	0-7h old; uninterested in blood
D5_males_R1	5 days old; uninterested in blood
D5_males_R2	5 days old; uninterested in blood
D5_males_R3	5 days old; uninterested in blood
D5_virgin_females_R1	5 days old; virgins; sugar-fed; blood-hungry
D5_virgin_females_R2	5 days old; virgins; sugar-fed; blood-hungry
D5_virgin_females_R3	5 days old; virgins; sugar-fed; blood-hungry
D1PBM_virgin_R1	24h post blood-meal; virgins; blood-hungry
D1PBM_virgin_R2	24h post blood-meal; virgins; blood-hungry
D1PBM_virgin_R3	24h post blood-meal; virgins; blood-hungry
D1PBM_mated_R1	24h post blood-meal; mated; blood-sated
D1PBM_mated_R2	24h post blood-meal; mated; blood-sated
D1PBM_mated_R3	24h post blood-meal; mated; blood-sated
D1PO_R1	24h post-oviposition; mated; blood-hungry
D1PO_R2	24h post-oviposition; mated; blood-hungry
D1PO_R3	24h post-oviposition; mated; blood-hungry

## Sheet: 1.genes_brain_with isoforms
geneID	gene name	D0_males_R1	D0_males_R2	D0_males_R3	D0_females_R1	D0_females_R2	D0_females_R3	D5_males_R1	D5_males_R2	D5_males_R3	D5_virgin_females_R1	D5_virgin_females_R2	D5_virgin_females_R3	D1PBM_virgin_R1	D1PBM_virgin_R2	D1PBM_virgin_R3	D1PBM_mated_R1	D1PBM_mated_R2	D1PBM_mated_R3	D1PO_R1	D1PO_R2	D1PO_R3
118505417	(E3-independent) E2 ubiquitin-conjugating enzyme UBE2O	15.0495	14.8744	24.335	13.5234	22.5526	15.9172	20.6187	21.0984	13.2204	17.1219	15.6141	14.5141	15.7065	15.0608	15.5111	14.4131	17.0194	16.8859	18.1297	16.0116	11.8741
118513684	(Lyso)-N-acylphosphatidylethanolamine lipase-like	48.264	62.6553	72.2148	62.5908	91.7981	67.0614	73.9107	73.4731	76.4322	70.1754	69.2052	68.6649	74.5488	74.2589	82.5963	72.8104	90.1902	86.3729	78.8989	76.9571	70.2637
118507879	(Lyso)-N-acylphosphatidylethanolamine lipase-like, transcript variant X1	16.144	18.4308	14.0604	19.4399	20.115	22.4162	26.8951	23.9852	25.5482	36.6468	30.8481	24.314	32.3236	32.3643	34.6569	31.8673	30.8337	48.3583	27.2691	30.6519	36.1525
118507879	(Lyso)-N-acylphosphatidylethanolamine lipase-like, transcript variant X2	12.6165	8.64507	13.6193	15.7311	13.1941	11.5203	15.3982	14.8134	14.9948	20.0219	22.9322	23.5445	19.2398	17.6118	19.5289	20.7156	18.4197	18.6577	22.9251	22.9482	24.7519
118512810	1,2-dihydroxy-3-keto-5-methylthiopentene dioxygenase	60.1812	70.1197	63.5414	64.3824	50.3329	58.3861	43.4635	42.3242	41.9901	41.7865	42.6396	43.4947	46.9232	56.2768	58.4851	67.6951	55.9389	50.4572	47.1902	43.3767	46.6749
118507362	1,4-alpha-glucan-branching enzyme, transcript variant X1	18.2796	14.1732	21.0105	19.0493	16.469	19.6154	29.1153	37.3103	38.4459	29.8283	40.3897	36.0657	28.6631	30.3672	23.7169	19.5405	23.6665	26.0338	28.6273	47.3172	35.9948
118507362	1,4-alpha-glucan-branching enzyme, transcript variant X2	7.35976	8.99422	5.77342	6.28919	12.1893	5.93249	17.2137	12.1274	10.0723	15.7513	3.28974	9.0726	8.21476	6.24332	12.498	12.3259	10.4479	10.3163	13.9676	11.0187	12.7945
118506788	1,5-anhydro-D-fructose reductase	6.17734	6.91598	6.66852	6.66324	4.31437	5.85335	3.88618	4.06753	3.00125	2.82021	2.86873	2.20868	3.65005	2.4361	3.26517	3.29771	3.03002	3.03232	2.02661	3.45543	2.63783
118505261	10 kDa heat shock protein, mitochondrial	506.909	561.614	508.261	517.202	498.845	514.519	170.774	169.957	209.789	192.047	204.82	181.206	178.458	210.274	215.915	196.369	201.102	243.47	202.673	183.76	203.071
118505903	116 kDa U5 small nuclear ribonucleoprotein component	26.1434	22.7772	25.9113	27.0659	25.619	27.6572	30.3043	33.2618	32.77	36.6014	35.6136	33.25	41.5929	39.6835	41.9711	41.0531	40.6418	37.1538	43.2377	41.0489	36.2781
118504341	13 kDa deflagellation-inducible protein-like	32.3814	43.4241	34.0657	33.9976	30.4284	29.91	29.1838	32.4661	28.2573	29.1173	28.7503	19.4247	24.4633	23.9434	25.2318	28.1511	24.4944	28.7205	26.544	25.2776	31.3264
118517541	14-3-3 protein epsilon	1852.72	1705.41	1863.94	1756.51	1876.78	2009.17	979.269	1156.92	1102.08	1221.63	1283.86	1271.16	1224.48	1174.64	1163.35	1214.42	1271.45	1238.17	1233.1	1088.26	1100.57
118508867	14-3-3 protein zeta, transcript variant X1	855.073	712.201	820.816	795.893	886.599	928.79	591.105	727.786	634.653	635.791	671.534	642.632	631.05	600.13	608.461	629.99	630.657	646.16	583.757	533.53	520.791
118508867	14-3-3 protein zeta, transcript variant X10	14.2175	12.5787	22.696	7.28533	11.1708	12.532	5.42236	3.25351	3.92255	4.61046	4.33787	3.96681	3.04129	3.15018	4.06409	2.88569	0.703823	0	5.26951	4.95459	2.63968
118508867	14-3-3 protein zeta, transcript variant X11	21.0764	33.1251	50.9429	15.6121	16.1457	40.167	46.6295	0.386462	13.3325	31.3137	24.6487	41.6365	32.0316	14.5294	3.74129	54.424	48.8757	69.7588	161.221	59.2944	23.0522
118508867	14-3-3 protein zeta, transcript variant X12	3.51522	8.29115	5.70824	10.4959	4.0408	4.47947	2.21507	0.386462	13.3325	10.8504	5.89685	10.9809	8.46232	0.362333	0.00226977	3.02247	15.3157	32.5222	19.5269	6.47561	0.764563
118508867	14-3-3 protein zeta, transcript variant X13	3.70403e-05	8.23903	6.09873	2.76833	1.99539	8.33317e-05	10.9374	0.0205431	0.0202832	0.0337349	0.0461432	4.45662	0.0204752	0.00520573	2.52645	0.134965	5.00877	0.498409	0.714069	30.0621	0.011913
118508867	14-3-3 protein zeta, transcript variant X14	39.1453	27.2143	44.4528	39.9995	27.3527	35.6283	1.12705	22.2266	57.3479	35.6965	42.6393	36.1399	36.761	33.1629	33.6053	91.1167	68.5077	62.3077	59.0757	81.1006	35.3288
118508867	14-3-3 protein zeta, transcript variant X15	17.508	15.4325	17.3662	13.7556	15.6292	13.2037	16.1495	17.8495	11.3976	15.5613	14.0001	11.1468	11.806	10.6762	9.8939	10.3517	9.03146	12.7097	11.2081	9.26478	9.36293
118508867	14-3-3 protein zeta, transcript variant X16	71.5244	48.1586	48.7933	76.3695	55.2737	40.6624	49.9139	40.5524	26.9162	32.5945	51.6583	15.4929	26.4891	36.7414	13.3296	23.864	26.2584	46.638	68.6324	31.3872	38.0634
118508867	14-3-3 protein zeta, transcript variant X17	57.0656	66.5843	69.8247	80.2782	46.6572	70.9347	58.6954	65.5675	72.3372	70.3377	65.3601	56.5372	34.0211	39.1314	37.1548	42.9385	85.4654	89.0148	94.7824	62.7185	34.4459
118508867	14-3-3 protein zeta, transcript variant X18	15.1471	11.0635	25.9135	15.0816	13.7263	15.9299	14.9973	22.2124	14.7625	10.4009	12.9206	14.9962	13.4133	12.5308	8.2194	10.2523	15.1253	11.5855	14.6852	19.1535	6.1845
118508867	14-3-3 protein zeta, transcript variant X19	7.3079	0.000190275	6.09873	2.76833	1.23289e-06	8.33317e-05	5.47702	0.0205431	5.32797	0.0337349	0.0461432	8.90901	0.0204752	0.00520573	2.28284e-05	0.134965	0.109832	7.76308	0.714069	0.214604	0.011913
118508867	14-3-3 protein zeta, transcript variant X2	225.874	252.376	238.204	234.552	253.178	293.623	89.5186	160.227	102.773	158.182	158.679	145.928	155.405	142.346	140.726	146.206	140.569	131.925	146.214	99.0436	126.447
118508867	14-3-3 protein zeta, transcript variant X20	0	0	0	0	0	0	0	0	0	0	0	0	0	0	0	0	0	0	0	0	0
118508867	14-3-3 protein zeta, transcript variant X21	77.0221	54.0217	67.7871	92.1813	72.2728	82.3973	86.4776	73.1537	73.5562	56.16	80.767	81.4661	74.536	85.8118	79.4096	67.0027	67.3706	65.3843	79.0276	69.1312	70.9927
118508867	14-3-3 protein zeta, transcript variant X3	320.798	304.953	341.988	291.652	313.617	292.23	95.9541	138.158	98.5994	86.2195	89.8769	80.1357	100.114	93.1667	96.8286	78.1617	71.7856	82.8328	126.667	84.5301	92.8767
118508867	14-3-3 protein zeta, transcript variant X4	2287.99	1990.5	2110.25	2245.51	2304.66	2576.28	1178.75	1348.88	1150.59	1333.36	1333.99	1341.15	1228.13	1241.06	1200.34	1144.15	1237.23	1172.39	1159.03	999.366	1192.79
118508867	14-3-3 protein zeta, transcript variant X5	15.5883	19.9636	18.4902	19.6579	14.3154	14.3307	6.3698	9.22501	9.75139	2.92149	3.78938	2.73707	5.71739	5.13264	4.09375	6.26093	4.14684	4.50496	2.59702	4.02376	5.5677
118508867	14-3-3 protein zeta, transcript variant X6	13.3501	14.8243	14.5478	11.5373	11.2723	18.5286	3.358	10.5353	3.63297	6.11168	6.00338	6.07271	5.21411	4.13431	5.40987	3.46998	6.19056	4.39995	9.89404	2.61502	6.31037
118508867	14-3-3 protein zeta, transcript variant X7	17.8844	22.3793	18.8444	15.7292	17.4988	15.511	6.42238	9.59141	10.6965	7.5787	8.52711	9.62904	6.64735	7.61267	8.20738	4.31984	6.02516	7.87278	10.1257	7.77592	7.80956
118508867	14-3-3 protein zeta, transcript variant X8	6.32073	4.90784	5.89838	6.54754	3.11639	2.82629	0.854786	3.857	0	0	1.7126	0	2.21713	1.5204	0.733798	0.675487	1.34227	0	1.61914	0	1.9328
118508867	14-3-3 protein zeta, transcript variant X9	8.82739	10.2048	10.6706	8.25705	4.70201	5.01038	3.54878	4.51805	3.80408	6.71371	1.80528	8.92425	3.50597	3.99126	4.6568	3.45711	4.15122	1.87197	4.38502	0.729959	4.90662
118507638	15-hydroxyprostaglandin dehydrogenase [NAD(+)]-like	165.777	158.623	171.579	168.91	186.068	197.965	125.117	138.297	130.212	148.662	138.706	145.715	154.293	150.088	149.748	160.052	159.324	151.428	155.668	132.374	141.414
118510099	17-beta-hydroxysteroid dehydrogenase 13-like	0.644013	0.170487	1.28861	0.140885	0.053914	0.116652	0	0	0.063472	0.26226	0.62433	0.279871	0.442726	0.0554729	0.121981	0.100635	0	0.367251	0.169857	0.317795	0.193948
118513874	17-beta-hydroxysteroid dehydrogenase 13-like	0.937806	0.237349	0.283698	1.47396	0.751451	0.121921	0.0902341	0.100331	0.442264	0.823223	0.304774	0.195419	0.192656	0.27021	0.25494	0.350446	0.486708	0.841455	0.197343	0.889095	0.337201
118517092	17-beta-hydroxysteroid dehydrogenase 13-like	0.937806	0.237349	0.283698	1.47396	0.751451	0.121921	0.0902341	0.100331	0.442264	0.823223	0.304774	0.195419	0.192656	0.27021	0.25494	0.350446	0.486708	0.841455	0.197343	0.889095	0.337201
118510098	17-beta-hydroxysteroid dehydrogenase 13-like, transcript variant X1	0	0	0	0	0	0	0	0	0	0	0	0	0	0	0	0	0	0	0	0	0
118510098	17-beta-hydroxysteroid dehydrogenase 13-like, transcript variant X2	0.736525	0.606363	0.828546	0.475538	0.15199	0	0.177664	0.098772	0	0.0546707	0	0.0961841	0.170529	0.152024	0.250991	0.314704	0	1.14085	0.109925	0.139275	0.199206
118510098	17-beta-hydroxysteroid dehydrogenase 13-like, transcript variant X3	0.423832	0.0732524	0.294953	1.1271	0.568695	0.0618588	0.137265	0.0763112	0.134633	0.305514	0.0662232	0.0742296	0.102841	0	0	0.290254	0	0.509863	0.155265	0.567138	0
118508020	17-beta-hydroxysteroid dehydrogenase 14-like	0.501964	1.36303	0.815634	0.807458	0.74048	0.600621	0.778355	0.37091	0.435748	0.451014	0.536594	0.602726	0.758798	0.189958	0.627872	0.690311	0.599823	0.450864	0.583519	0.768886	0.663422
118512615	18S rRNA aminocarboxypropyltransferase	10.4218	10.8419	11.092	16.0745	13.6155	14.1829	14.074	14.3115	16.1414	14.8835	13.0038	16.0482	18.3577	17.5576	16.41	16.4227	13.442	15.1208	18.0945	12.9665	19.091
118503171	1-acylglycerol-3-phosphate O-acyltransferase Pnpla3-like, transcript variant X1	0	0	0	0	0	0	0	0	0	0	0	0	0	0	0	0	0	0	0	0	0
118503171	1-acylglycerol-3-phosphate O-acyltransferase Pnpla3-like, transcript variant X2	7.72395	10.359	11.7418	10.6476	12.9552	13.3556	9.59436	10.6698	10.7161	16.221	13.2379	22.287	12.0242	16.279	18.9346	10.9841	19.4429	10.8145	11.5915	20.4061	8.58225
118503171	1-acylglycerol-3-phosphate O-acyltransferase Pnpla3-like, transcript variant X3	0	0	0.368139	0.670844	0.984069	0.722227	0.38745	0	0	0.887646	1.72605	0.606451	0.799367	0.459578	0.544041	0.809835	0.644478	0.240344	0.760789	0.489044	0
118503171	1-acylglycerol-3-phosphate O-acyltransferase Pnpla3-like, transcript variant X4	8.56198	0.890292	5.68271	6.91252	2.09664	5.82621	2.40786	26.168	17.4149	20.8889	23.5093	69.3666	31.9685	31.6776	39.816	4.57516	34.1734	8.61146	25.6178	49.9474	19.4095
118503171	1-acylglycerol-3-phosphate O-acyltransferase Pnpla3-like, transcript variant X5	4.56407	2.53573	5.22054	3.18416	2.43919	7.46903	3.08043	10.1451	4.84306	12.8368	13.1562	33.8424	11.0433	19.5416	21.8546	4.05521	14.3377	5.80286	12.8186	20.4432	12.1215
118503171	1-acylglycerol-3-phosphate O-acyltransferase Pnpla3-like, transcript variant X6	0	0	0	0	0	0	0	0.52893	0	0	0	0	0	0	0	0	0	0.0767839	0	0	0
118503171	1-acylglycerol-3-phosphate O-acyltransferase Pnpla3-like, transcript variant X7	7.95783	6.98386	5.35706	7.34078	8.70263	9.34471	8.1681	16.6972	8.99843	13.0394	15.4169	31.5487	14.0536	21.8859	15.5935	8.21113	18.569	9.59546	8.4479	21.6319	9.28991
118505518	1-acyl-sn-glycerol-3-phosphate acyltransferase alpha	208.79	193.065	194.778	188.347	199.138	200.745	150.554	157.679	156.625	138.609	143.311	147.876	123.035	128.781	139.7	134.835	142.876	147.635	133.134	126.584	119.676
118510786	1-acyl-sn-glycerol-3-phosphate acyltransferase alpha-like, transcript variant X1	0.725889	1.46913	1.78212	2.96079	0.931608	4.2416	8.57273	10.2672	4.36474	2.74231	11.679	6.01635	6.5746	4.67414	4.03336	5.01313	4.01396	3.63591	4.61914	3.35876	7.5055
118510789	1-acyl-sn-glycerol-3-phosphate acyltransferase alpha-like, transcript variant X1	113.84	103.023	157.034	87.6677	131.867	106.012	151.367	163.546	153.071	85.7704	92.771	94.059	80.0853	89.5344	97.6158	80.3411	112.728	89.3628	85.9502	116.256	64.0491
118510786	1-acyl-sn-glycerol-3-phosphate acyltransferase alpha-like, transcript variant X10	0	0	0.057453	0	0	0	0	0	0.604282	0	0	1.01396	0	0	0	0.374145	0	0	0	0	0
118510786	1-acyl-sn-glycerol-3-phosphate acyltransferase alpha-like, transcript variant X2	13.3335	11.3708	14.5309	9.632	11.8887	14.9418	99.8613	104.182	103.727	85.4792	58.9059	77.0183	68.0984	62.7248	52.3887	55.0396	48.837	41.0219	75.9907	53.3466	51.8385
118510789	1-acyl-sn-glycerol-3-phosphate acyltransferase alpha-like, transcript variant X2	1.18083	2.62818	0	0	2.84938	1.03696	0	3.30654	1.90103	6.43806	0	0	0	1.95221	0	4.78784	4.66513	4.61187	4.37645	1.66719	3.33133
118510786	1-acyl-sn-glycerol-3-phosphate acyltransferase alpha-like, transcript variant X3	0	0	0.468574	0	0	1.478	0	4.46666	4.08346	2.56437	0.644217	4.62351	2.27339	2.50334	2.89713	2.23703	1.1387	1.22706	1.88044	1.98302	6.71287
118510786	1-acyl-sn-glycerol-3-phosphate acyltransferase alpha-like, transcript variant X4	5.82447	6.67714	6.68627	5.27083	4.53353	5.39826	37.9439	30.2842	27.516	20.8644	33.433	19.3477	31.9174	22.2761	18.6566	19.9872	19.2562	21.6049	19.2885	17.2117	13.4398
118510786	1-acyl-sn-glycerol-3-phosphate acyltransferase alpha-like, transcript variant X5	1.19064	0.955684	0.807414	1.41047	0	0.894214	14.7472	10.6195	15.3077	15.53	8.6537	7.08575	6.39409	7.05554	8.67302	7.26779	6.40737	6.80012	7.85992	8.06787	8.20697
118510786	1-acyl-sn-glycerol-3-phosphate acyltransferase alpha-like, transcript variant X6	0.927612	0	0.00765626	0	0	1.12506	0	0.696632	0.00862586	1.79282	0	8.62974e-06	2.07611	1.19755	0	1.00093	0	0	1.60507	1.65683	0
118510786	1-acyl-sn-glycerol-3-phosphate acyltransferase alpha-like, transcript variant X7	0	0	0	0	0.499231	0.996804	4.1313	2.1509	1.90832	4.7069	2.13823	2.52396	1.04961	1.69818	1.82142	4.14992	1.27149	2.22868	1.96029	3.1996	4.372
118510786	1-acyl-sn-glycerol-3-phosphate acyltransferase alpha-like, transcript variant X8	0.00250109	0	0.980986	0	0	0	0	0	0.0967928	0	0	5.4404e-07	0	0	0	0.0110839	0	0	0	0	0
118510786	1-acyl-sn-glycerol-3-phosphate acyltransferase alpha-like, transcript variant X9	0	0	0	0	0.513706	0.53047	0	0	0.708411	1.11389	0.925879	0.76563	0	0	0.792826	0	0	1.79941	0	0	0.623576
118510799	1-acyl-sn-glycerol-3-phosphate acyltransferase beta-like	2.02308	2.45239	2.34813	1.46452	1.39896	1.1095	1.79265	2.367	2.74412	1.47699	0.648823	1.70057	1.72022	1.33975	1.0544	0.782488	0.863423	1.72635	0.587961	1.10689	1.16973
118511395	1-acyl-sn-glycerol-3-phosphate acyltransferase gamma-like, transcript variant X1	53.7071	37.1029	52.1117	57.792	52.2132	49.1165	67.406	50.8261	68.1021	75.9511	62.7152	60.5874	62.1253	66.0389	79.2596	79.2317	80.8549	73.0859	54.7086	77.9748	47.7406
118511395	1-acyl-sn-glycerol-3-phosphate acyltransferase gamma-like, transcript variant X2	3.35672	6.21729	6.40785	5.97219	2.73497	3.78488	3.87128	4.16689	5.19224	2.84386	6.18219	5.93245	4.83588	6.66896	5.62743	5.95309	3.72499	11.0567	3.55428	6.1473	5.37002
118511395	1-acyl-sn-glycerol-3-phosphate acyltransferase gamma-like, transcript variant X3	3.80244	17.4222	0.00677971	7.16835	15.0768	13.9551	21.8648	24.8007	18.9824	11.2387	10.8766	24.9668	14.4223	15.054	14.2341	10.3129	16.0104	12.6694	17.4661	15.1924	30.2631
118511395	1-acyl-sn-glycerol-3-phosphate acyltransferase gamma-like, transcript variant X4	1.46876	6.68894e-06	0.731282	2.06413	2.82495	1.29684	2.64724	2.57515	0.896041	2.32588	1.59522	2.02564	2.47206	2.28014	1.15216	1.22702	1.64047	1.77334	0.925055	0.910054	0
118504732	1-phosphatidylinositol 3-phosphate 5-kinase-like, transcript variant X1	0	0.825237	0.581888	0	0.620844	0	0.316275	0.562875	0.414242	0.292422	0.151893	0	0	0.673617	1.10492	0	0	0.518853	0.961115	0	0.319175
118504732	1-phosphatidylinositol 3-phosphate 5-kinase-like, transcript variant X10	0	0	0.233325	0	0	0	0	0.120042	0.181336	0	0	0	0	0	0	0	0	0	0	0.101678	0
118504732	1-phosphatidylinositol 3-phosphate 5-kinase-like, transcript variant X11	0	0	0	0	0	0	0	0.357587	0.583551	0	0	0	0.461499	0	0	0	0	0	0	0.330402	0
118504732	1-phosphatidylinositol 3-phosphate 5-kinase-like, transcript variant X2	0.10834	1.40641e-06	0.807518	0.926474	0	0.288714	0.113737	0.227624	0.0747787	0.260517	0.122773	0.544312	0.0473749	0.0701606	0.254534	0	0.462608	0	0.0841099	0.0625637	0.0624268
118504732	1-phosphatidylinositol 3-phosphate 5-kinase-like, transcript variant X3	0.396636	0	0	0	0	1.10907	0.469377	0.826445	0.29738	1.09654	0.46015	0	0.17245	0.249841	0	0	0	0.413241	0.334775	0.251962	0.224161
118504732	1-phosphatidylinositol 3-phosphate 5-kinase-like, transcript variant X4	0	0.0988883	0	0.0770624	0	0	0.0209992	0	0.0225453	0	0.022207	0.171204	0	0.0453412	0	0.148643	0.0565383	0.0135677	0.0422239	0.0478875	0.0549925
118504732	1-phosphatidylinositol 3-phosphate 5-kinase-like, transcript variant X5	0	0	0	0	0	0	0.0619232	0	0.0646458	0	0.0608428	0	0.114897	0.119554	0	2.90035e-09	2.50757e-10	0.0399493	0.121132	0.138454	0.145957
118504732	1-phosphatidylinositol 3-phosphate 5-kinase-like, transcript variant X6	0.0980085	0.484588	0.00152487	0.609242	0.367851	0	0.297214	0.000745872	0.000786414	0.182667	0.283116	0.82628	0.264663	0.166655	0.638251	1.29212	0.833575	0	0.200779	0.000421471	0.319027
118504732	1-phosphatidylinositol 3-phosphate 5-kinase-like, transcript variant X7	0	0	0	0	0	0	0	0	0	0	0	0	0	0.0311833	0	0.0349479	0	0.0816992	0	0.00460272	0
118504732	1-phosphatidylinositol 3-phosphate 5-kinase-like, transcript variant X8	0.221171	0	0	0	0	0	0	0.170388	0	0	0.182321	0	0.169712	0	0.315166	0	0	0	0	0.242952	0
118504732	1-phosphatidylinositol 3-phosphate 5-kinase-like, transcript variant X9	0.292766	0	0	0	0	0	0.981869	0.00221184	0.00251855	0.613507	0.862325	0	0.786828	0.486423	0	4.05089e-09	5.19361e-10	0.880008	0.643404	0.0013629	0.937861
118509225	1-phosphatidylinositol 4,5-bisphosphate phosphodiesterase classes I and II, transcript variant X1	1.02578	0.630595	2.05374	0.828764	1.86801	1.14884	1.35773	1.953	0.684192	1.8489	1.32718	1.96051	1.53045	1.62731	1.82378	1.15869	1.47065	1.32508	1.5401	1.05892	0.540807
118509225	1-phosphatidylinositol 4,5-bisphosphate phosphodiesterase classes I and II, transcript variant X2	0.107466	0.369761	0.35137	0.287676	0.702364	0.254175	0.426122	0	0.413173	0.40757	0.0817213	0.757455	0.265398	0.447277	0.485012	0.534162	0.590508	0.227035	0.308763	0.165095	0.380841
118509225	1-phosphatidylinositol 4,5-bisphosphate phosphodiesterase classes I and II, transcript variant X3	0	0.0690711	0.136904	0.0360289	0.244008	0.094994	0.0610189	0.44679	0.0591629	0.0789103	0.0774822	0.0950064	0.0516763	0	0	0.0448122	0.0524584	0.0569136	0.0421791	0	0
118509225	1-phosphatidylinositol 4,5-bisphosphate phosphodiesterase classes I and II, transcript variant X4	0	0	0	0	0	0.0832032	0	0	0	0.0496088	0.049824	0	0.0381178	0	0	0	0	0	0	0	0
118509225	1-phosphatidylinositol 4,5-bisphosphate phosphodiesterase classes I and II, transcript variant X5	28.4798	29.2401	47.1622	31.556	58.1575	36.4619	56.9556	51.4652	27.4886	52.4036	41.7313	47.1681	40.6218	38.9676	37.498	37.5567	46.2679	50.246	40.46	38.6649	32.582
118509225	1-phosphatidylinositol 4,5-bisphosphate phosphodiesterase classes I and II, transcript variant X6	1.20075	1.17313	2.75042	0.888675	3.05858	1.38667	2.16193	3.09	1.2996	2.60084	1.54359	2.2735	1.74199	1.60887	1.76154	1.29161	2.60046	1.76229	1.27454	1.43267	1.29306
118507575	1-phosphatidylinositol 4,5-bisphosphate phosphodiesterase epsilon-1-like, transcript variant X1	14.2186	18.0919	55.8457	12.4976	58.3615	27.0247	69.0731	69.1037	22.4712	43.9704	61.8116	41.2542	44.5756	64.8886	64.8895	50.7663	70.0872	61.0704	60.7805	87.2995	52.0072
118507575	1-phosphatidylinositol 4,5-bisphosphate phosphodiesterase epsilon-1-like, transcript variant X2	2.79216	6.51094	12.0683	2.85523	18.2629	7.48282	13.8925	15.7049	5.12172	13.9322	11.7773	10.3912	9.12891	10.6037	13.2047	7.55581	13.4703	12.3097	11.4356	15.6366	8.31142
118507575	1-phosphatidylinositol 4,5-bisphosphate phosphodiesterase epsilon-1-like, transcript variant X3	2.74296	0.107449	8.99683	1.89047	4.36701	6.21611	11.9542	8.90615	3.02705	6.60987	4.30399	5.0933	5.74144	4.92972	8.12709	4.18633	8.97767	9.49694	8.80385	6.89826	6.15281
118507575	1-phosphatidylinositol 4,5-bisphosphate phosphodiesterase epsilon-1-like, transcript variant X4	3.34259	5.53892	12.7425	4.86125	25.8548	7.30274	21.6277	19.7223	6.97245	16.1215	16.3037	26.2667	21.5771	17.4153	18.6963	18.0104	25.2181	16.5651	18.66	30.5523	19.6673
118507575	1-phosphatidylinositol 4,5-bisphosphate phosphodiesterase epsilon-1-like, transcript variant X5	6.85532	8.06497	27.6375	4.94595	35.1229	12.9457	41.2308	41.8979	11.9226	38.047	28.2165	30.6456	30.9524	38.8461	38.6125	39.1427	47.0819	49.5451	46.6282	38.8542	27.8206
118507575	1-phosphatidylinositol 4,5-bisphosphate phosphodiesterase epsilon-1-like, transcript variant X6	2.83557	4.17016	5.4305	1.75524	5.16269	2.4488	3.57899	10.6621	1.34659	5.17535	4.335	8.79718	6.34886	8.02697	6.42776	4.32622	12.4295	8.79393	10.0327	12.0869	4.76573
118507575	1-phosphatidylinositol 4,5-bisphosphate phosphodiesterase epsilon-1-like, transcript variant X7	0.451485	1.7245	3.7624	1.03998	2.80162	0.75522	2.11912	1.54125	0.619849	2.18435	3.01879	3.55688	2.21783	3.63438	3.8864	2.55143	3.54559	4.00147	2.95681	2.97666	1.77945
118507575	1-phosphatidylinositol 4,5-bisphosphate phosphodiesterase epsilon-1-like, transcript variant X8	28.4257	32.7569	53.5995	36.9875	40.7883	31.3513	74.5165	70.0285	51.2672	77.0946	54.2275	55.2072	58.0746	41.852	38.2087	60.5344	73.5334	94.3788	102.396	82.6186	68.6556
118507575	1-phosphatidylinositol 4,5-bisphosphate phosphodiesterase epsilon-1-like, transcript variant X9	0.445031	1.09602e-10	0.831906	1.68721e-10	1.0419	0.373062	0	0.514752	1.26176e-08	0.862883	0	1.83785e-10	0	1.71913e-10	0	4.35389e-09	0.699727	0.788943	0.833089	0	2.52018e-10
118504266	1-phosphatidylinositol 4,5-bisphosphate phosphodiesterase gamma-1	7.72939	10.0318	15.1617	8.42931	17.1445	11.2309	19.596	20.9471	15.3502	18.5665	17.6205	16.9868	19.2951	19.7731	19.9679	18.4097	19.4553	19.9369	22.912	22.3102	17.6105
118506570	1-phosphatidylinositol 4,5-bisphosphate phosphodiesterase, transcript variant X1	62.0066	62.0175	93.1298	56.7948	99.6679	62.689	119.321	113.671	79.3115	105.702	88.0967	97.3047	85.2717	80.33	77.372	75.8361	101.545	106.131	99.4867	114.065	79.0479
118506570	1-phosphatidylinositol 4,5-bisphosphate phosphodiesterase, transcript variant X2	6.26215e-09	7.65427e-09	9.11261e-09	0.62423	1.2507e-08	1.52488	5.45108	1.05825e-07	2.43745	1.6058	1.59762	6.3852	1.48218	2.07125	4.19915e-08	1.24565	0.673588	7.01261	3.26722e-08	2.87874	0.585315
118517623	2,3-bisphosphoglycerate-dependent phosphoglycerate mutase-like, transcript variant X1	240.225	229.942	234.896	312.587	257.718	248.57	214.726	249.071	262.421	219.438	227.185	236.529	212.126	193.788	210.259	230.2	200.812	190.355	192.222	185.628	207.397
118517623	2,3-bisphosphoglycerate-dependent phosphoglycerate mutase-like, transcript variant X2	0.158604	0.0951107	0	0	0	0	0.359617	0	0.203732	0	0.204738	0.303513	0.124366	0.0593215	0	0	0.0549253	0	0.357343	0	0
118517623	2,3-bisphosphoglycerate-dependent phosphoglycerate mutase-like, transcript variant X3	121.739	158.082	92.2938	58.2005	32.3267	86.9628	59.2321	36.616	61.3665	42.3662	32.1923	20.2278	34.3871	58.9431	40.665	26.0716	29.1782	41.529	58.5186	50.8566	44.8956
118517623	2,3-bisphosphoglycerate-dependent phosphoglycerate mutase-like, transcript variant X4	0.0205469	0.0201028	0.138935	0	0.112687	0.239471	0.0165751	0.490608	0.00665724	0.0763078	0.00323028	0.00249402	0.00243847	0.00307042	0	0.403076	0.000833276	0.500182	0.0196342	0.217771	0.218137
118510997	2,5-diketo-D-gluconic acid reductase B-like	5.56567	8.30808	6.21743	7.86262	7.2588	8.98291	10.0845	9.85315	9.41047	8.60328	8.22738	9.55429	14.0916	11.1851	7.6675	9.26931	8.14816	9.8047	9.50277	9.73627	7.25112
118513326	2',5'-phosphodiesterase 12	12.6948	14.3835	14.1277	14.003	14.2107	15.06	14.9921	15.2474	13.8971	16.7417	16.3627	14.5008	20.4055	17.693	17.7656	15.686	15.7774	15.3035	19.0061	17.5897	18.3246
118505126	227 kDa spindle- and centromere-associated protein-like	7.11828	5.49855	6.09226	7.10938	6.37176	6.50312	8.63637	9.6163	8.41504	11.0741	9.46338	9.36403	10.4756	8.67895	10.3151	9.63697	10.6224	8.00693	11.1918	9.28867	10.3283
118511980	23 kDa integral membrane protein	2.32314	1.81789	1.99817	0.541575	0.483299	0.821521	0.414469	0.368676	0.0812735	0.252056	0.479947	0.269175	0.495763	0.354819	0.390432	0.193227	0.510971	0.403297	0.145043	1.22406	0.186002
118510240	23 kDa integral membrane protein-like, transcript variant X1	7.3691	6.90411	6.9052	7.35547	5.90261	9.81244	7.00196	7.39904	5.49831	8.09216	10.7088	8.47947	9.035	7.89966	8.59658	5.50701	7.57387	6.49858	10.3425	6.82744	6.86554
118517267	23 kDa integral membrane protein-like, transcript variant X1	49.338	25.419	38.5269	43.2846	41.017	35.7569	26.7093	30.4637	22.9488	30.8851	28.2587	34.9193	29.0625	29.5467	30.9661	26.8345	24.8009	28.9686	37.5138	33.0997	31.4849
118510240	23 kDa integral membrane protein-like, transcript variant X2	37.3845	28.3627	33.1813	36.0953	36.159	38.6755	19.5506	26.527	18.8695	20.7733	20.3912	22.3126	25.9191	21.9053	22.9982	22.9813	19.7605	19.4794	45.8438	18.3738	42.9861
118517267	23 kDa integral membrane protein-like, transcript variant X2	177.599	168.071	168.482	190.709	175.829	198.97	100.02	157.014	101.36	107.851	137.818	115.752	149.561	128.113	129.588	100.573	96.5692	102.544	219.541	109.682	206.997
118511945	25S rRNA (cytosine-C(5))-methyltransferase nop2	21.7608	20.2513	21.3803	22.7274	21.5568	23.4374	25.8179	28.7526	23.6628	27.841	29.2532	30.4945	33.433	28.1565	31.0822	30.195	30.396	30.5354	36.9791	30.2744	32.3934
118504866	26S proteasome complex subunit SEM1	808.03	891.381	752.825	768.543	734.361	789	463.608	508.271	619.449	555.402	569.28	578.717	516.304	546.462	543.022	668.782	532.578	534.269	574.505	480.5	560.75
118506145	26S proteasome non-ATPase regulatory subunit 1	89.6973	90.6828	104.879	86.0015	97.4189	81.3063	70.1752	85.4529	76.9381	72.2082	75.721	83.164	83.8239	79.2263	82.8863	72.4834	80.2824	72.4107	87.4839	85.535	67.4429
118517418	26S proteasome non-ATPase regulatory subunit 10-like	40.7435	42.8377	44.0333	54.3321	51.7974	51.23	35.3275	33.5426	37.1283	45.1709	47.1533	41.9462	43.1824	44.8528	40.4462	50.3134	42.1328	41.7508	48.0962	44.1691	48.9028
118506434	26S proteasome non-ATPase regulatory subunit 11	134.893	135.016	120.324	134.658	124.288	128.587	74.1714	80.5876	91.1999	81.5529	84.947	84.9363	89.1584	88.3245	94.4838	88.462	89.5105	86.0089	90.5551	87.2649	85.5059
118512883	26S proteasome non-ATPase regulatory subunit 12	145.661	147.092	143.894	144.444	137.646	148.799	84.4236	95.9005	98.2068	96.5221	102.004	101.566	105.408	102.746	111.888	107.45	103.924	97.1092	102.21	93.9855	101.237
118505223	26S proteasome non-ATPase regulatory subunit 13-like	155.489	154.111	140.215	151.433	143.823	165.511	99.9452	107.489	125.952	120.157	114.741	129.763	125.17	125.283	124.887	127.655	132.017	118.697	132.327	118.486	136.071
118517170	26S proteasome non-ATPase regulatory subunit 13-like	4.67025	6.80846	5.39569	1.866	2.14675	6.97032	2.57304	5.72167	2.52838	0	12.4083	0	8.83501	6.65164	7.29174	4.01337	0	0	6.75865	0	0
118512473	26S proteasome non-ATPase regulatory subunit 14	147.752	147.315	141.023	152.182	129.074	162.792	89.4265	96.8026	101.935	105.623	114.521	109.056	113.036	115.093	118.424	108.986	112.879	109.964	120.942	106.446	118.202
118505746	26S proteasome non-ATPase regulatory subunit 2-like	78.4952	27.3752	79.6993	90.8999	52.8235	27.1166	38.3069	62.1504	41.542	27.5796	54.1094	44.4012	84.9463	55.0768	43.137	49.9024	60.0585	55.9689	52.7702	52.7339	47.2906
118517025	26S proteasome non-ATPase regulatory subunit 2-like	40.953	90.7121	52.5292	24.8839	67.1195	92.9835	41.7141	33.0391	46.0899	58.2054	35.703	51.8196	12.9184	38.2901	57.9795	40.3058	42.159	30.0056	45.1752	40.9257	46.1503
118512860	26S proteasome non-ATPase regulatory subunit 4	199.427	205.406	192.019	207.299	185.558	197.146	119.953	136.646	145.379	136.392	135.366	130.844	128.094	138.603	150.667	140.016	134.394	119.745	128.311	129.209	131.291
118505210	26S proteasome non-ATPase regulatory subunit 5	75.4662	68.4352	71.1011	71.3584	69.2707	73.481	57.9353	59.342	57.1665	59.8482	63.017	60.2349	68.2076	61.0204	64.3931	64.9688	62.7629	57.225	60.8918	53.2881	60.1135
118505570	26S proteasome non-ATPase regulatory subunit 6	103.58	117.252	114.631	113.223	116.187	111.88	73.6426	86.6338	90.137	83.1671	80.8275	86.8217	85.6115	83.7448	83.3949	88.496	82.7679	72.9984	92.4164	88.5969	89.4281
118504768	26S proteasome non-ATPase regulatory subunit 8	166.065	178.936	152.76	154.889	132.448	162.329	111.945	125.367	123.856	123.184	132.699	124.973	126.328	121.599	120.881	132.662	120.495	114.799	139.812	126.072	132.252
118506473	26S proteasome regulatory subunit 10B	141.892	144.652	131.393	125.92	117.69	132.699	81.1355	96.9422	100.814	89.7215	95.448	95.2991	102.178	97.8551	99.6115	99.941	100.045	85.1735	90.5987	93.7544	91.2722
118504813	26S proteasome regulatory subunit 4	105.452	94.8229	99.1327	93.5089	86.0485	100.712	61.7789	74.9376	72.6382	74.3594	70.5611	75.4761	70.9563	85.4943	78.6378	73.0149	81.1916	65.1817	85.6018	68.8803	75.2767
118504814	26S proteasome regulatory subunit 4	75.1286	69.6319	78.9653	69.053	70.7392	81.5018	45.194	54.8336	51.6232	50.8965	58.7588	57.7519	54.9832	53.9519	56.4287	54.7024	55.9235	52.1769	60.7962	58.096	58.8993
118505771	26S proteasome regulatory subunit 6A-B	106.722	103.077	115.665	107.808	115.163	119.318	69.1727	87.8167	77.4737	71.3417	82.8491	85.685	84.9353	85.1933	88.6478	88.5397	88.6734	74.8344	97.1851	90.7258	90.4764
118504220	26S proteasome regulatory subunit 6A-B-like	0	0.0707326	0	0.0585236	0.134306	0.0726407	0.0806212	0	0	0.0817123	0	0.0872539	0	0	0	0	0.0621195	0	0.0705345	0	0
118508278	26S proteasome regulatory subunit 7	157.185	147.466	149.819	143.269	131.959	147.909	78.3391	93.3088	98.4421	86.7828	100.166	91.397	92.2357	96.9169	99.915	91.6568	90.0139	86.0857	90.3904	87.0719	89.0912
118510219	26S proteasome regulatory subunit 8	219.6	215.92	212.037	221.552	202.119	211.695	141.435	149.179	170.853	154.542	158.682	163.666	153.913	161.748	157.062	155.324	150.819	151.297	144.232	150.479	164.328
118508884	27 kDa glycoprotein-like, transcript variant X1	9.75021	5.70584	7.00959	11.639	9.43561	7.36688	5.16429	7.06471	8.45116	9.02766	5.09044	3.34656	9.75625	9.38412	10.9827	0.0566991	5.65854	2.32114	2.85423	4.12859	7.08898
118508884	27 kDa glycoprotein-like, transcript variant X2	23.4329	11.288	13.5814	13.5401	13.8417	14.6775	14.1228	17.9432	14.6463	7.98306	16.5171	13.6439	15.6729	15.1894	13.1049	12.8201	7.89019	9.81465	9.22357	9.006	16.0603
118508884	27 kDa glycoprotein-like, transcript variant X3	4.00669	5.20422	3.75273	5.90953	6.96848	5.79531	11.6767	9.15918	6.25944	9.90881	11.1932	9.18722	5.99849	6.78839	8.52528	8.61003	9.60375	4.7446	8.53896	5.48215	6.54896
118508884	27 kDa glycoprotein-like, transcript variant X4	4.46975	14.1932	16.3569	15.0964	2.59735	27.5828	15.5091	16.4716	17.8336	23.6286	27.3395	24.6126	18.0105	15.9199	15.0471	23.3767	17.3585	21.3881	26.0801	25.0989	24.254
118508884	27 kDa glycoprotein-like, transcript variant X5	5.40367	8.28886	1.94372	7.91	6.45118	3.77279	6.38019	7.17098	10.3115	5.68869	6.4428	5.66008	9.61787	7.96494	8.80276	7.53482	5.38893	7.91223	4.33351	9.49131	6.44153
118508884	27 kDa glycoprotein-like, transcript variant X6	7.27332	10.5933	2.92314	5.96521	7.84813	7.28373	7.88561	7.43262	7.98539	6.10034	7.22062	10.2822	11.6932	10.253	10.6331	6.70038	8.99158	7.23182	4.37935	11.1627	13.5656
118508884	27 kDa glycoprotein-like, transcript variant X7	28.192	14.891	21.6644	23.712	21.9671	13.0872	16.2419	9.457	19.1789	15.74	11.7609	9.90725	16.0992	20.8147	15.5489	17.8873	14.1089	11.7454	18.317	8.09395	18.1933
118508886	27 kDa hemolymph protein-like	948.948	729.839	662.909	702.763	594.345	718.135	685.777	505.343	694.724	680.147	652.016	911.59	674.376	726.881	591.477	620.008	570.817	511.2	557.044	749.53	984.322
118509488	27 kDa hemolymph protein-like	11.2936	5.94861	8.58659	28.8106	19.6562	34.4603	68.8942	44.5956	70.4601	65.484	105.305	99.2153	26.4	19.8975	11.467	10.5437	3.7388	7.25689	39.984	56.1046	129.341
118507605	28 kDa heat- and acid-stable phosphoprotein	284.985	303.336	315.47	289.357	282.931	293.779	171.782	209.28	196.892	199.122	204.578	210.31	197.787	196.266	205.81	192.846	206.818	193.995	214.992	180.787	176.764
118505496	28S ribosomal protein S10, mitochondrial	30.7336	33.5285	24.2268	24.9384	19.2674	25.4593	14.1283	17.0508	21.3765	13.8349	14.6754	14.5605	17.7984	22.0043	21.0495	16.0258	18.8565	9.67608	16.7191	11.2689	20.103
118504905	28S ribosomal protein S11, mitochondrial	64.2865	57.4356	58.9698	60.3352	47.1779	58.7263	55.9697	58.8854	64.21	63.7854	65.2521	53.0354	63.3868	53.6614	65.2722	68.3533	58.4786	68.5352	69.9722	63.3453	69.0978
118513350	28S ribosomal protein S14, mitochondrial	190.505	198.166	164.287	201.004	147.866	187.707	145.724	151.032	169.759	167.421	159.56	146.031	156.716	160.633	149.904	148.301	140.204	130.617	163.205	147.002	151.996
118512809	28S ribosomal protein S15, mitochondrial	96.8015	101.38	90.9878	90.759	82.7994	93.0677	70.1221	76.0369	83.3463	69.4678	69.5986	73.1341	81.3814	73.2543	78.421	74.804	71.4756	67.1774	74.356	66.3419	72.2605
118509772	28S ribosomal protein S17, mitochondrial	114.562	111.687	105.149	104.292	79.8228	99.9083	70.4675	78.8454	87.1184	76.1738	79.1651	72.5225	83.6465	80.2848	82.6075	86.5371	74.9199	70.8739	77.7836	80.5146	80.1586
118506954	28S ribosomal protein S18a, mitochondrial	109.77	117.366	114.515	114.723	87.206	115.819	76.8071	86.7764	84.8259	91.2265	82.1955	84.3419	84.3525	74.0406	78.9326	85.6784	77.3326	77.6875	93.0955	81.6036	85.7944
118513827	28S ribosomal protein S18b, mitochondrial	49.5495	45.7551	50.2568	44.8122	42.4245	45.7311	30.8887	36.1587	32.6573	31.0953	30.3865	32.0494	35.9125	31.6267	38.3837	33.7175	34.712	36.1572	37.9518	37.2085	36.8408
118505050	28S ribosomal protein S18c, mitochondrial	99.2286	98.3637	90.7841	139.381	117.242	129.341	87.8978	78.6852	102.172	107.769	107.461	111.18	105.81	107.639	116.873	129.307	112.771	109.158	123.663	102.458	115.843
118506159	28S ribosomal protein S2, mitochondrial	52.8029	60.4807	51.42	55.7232	45.8762	54.8961	34.5444	35.2576	38.0404	36.8502	36.5253	35.2161	35.6083	31.9389	30.3717	38.331	27.6998	34.8912	32.4095	37.3177	36.4605
118514584	28S ribosomal protein S21, mitochondrial	345.601	320.83	307.717	312.818	230.883	327.853	243.015	240.321	272.16	264.08	264.486	270.325	254.459	285.995	251.482	305.131	243.598	250.257	295.275	254.376	282.329
118512177	28S ribosomal protein S22, mitochondrial	64.2193	60.262	59.068	59.0025	50.5942	57.8733	48.2974	50.7127	59.9934	55.7704	54.3906	50.1623	47.3711	51.2149	50.6338	51.019	46.8817	53.7685	49.0709	51.9107	53.7807
118509248	28S ribosomal protein S28, mitochondrial	63.2577	63.4327	56.2292	55.9566	49.026	60.921	43.9605	53.7958	50.254	50.5464	47.5709	42.2507	52.3728	52.9729	49.8959	50.2968	43.8382	52.4334	52.644	44.3126	56.0133
118503166	28S ribosomal protein S31, mitochondrial	34.965	41.4533	36.6471	38.8823	29.4166	35.1681	28.0629	30.0218	31.589	30.0615	32.3778	29.4264	34.5545	35.6035	31.6831	38.6477	29.1271	29.2165	38.5676	32.0929	35.5363
118505823	28S ribosomal protein S33, mitochondrial	144.046	145.022	123.173	125.806	97.381	144.963	83.621	106.62	103.179	99.3161	111.439	87.6008	98.9507	103.316	107.463	101.791	95.8409	76.7115	123.556	94.5388	103.126
118513487	28S ribosomal protein S35, mitochondrial	47.887	46.0383	52.5561	49.3057	45.7932	51.2416	36.6625	44.6724	39.0993	37.3598	36.6646	34.3607	42.98	38.8297	43.0186	41.5271	39.2292	40.7437	42.0414	40.1717	37.1086
118508038	28S ribosomal protein S36, mitochondrial, transcript variant X1	394.003	387.217	379.359	392.672	302.961	355.128	314.081	341.09	375.08	315.293	303.122	332.323	284.298	288.446	297.889	286.045	282.928	276.81	326.51	318.577	313.795
118508038	28S ribosomal protein S36, mitochondrial, transcript variant X2	8.34166	12.09	7.4149	6.65555	6.79332	8.26994	5.69383	8.74337	4.47674	6.34821	8.51358	2.63818	7.48572	7.83099	1.12294	3.90138	7.11469	4.70545	1.09901	3.55391	9.88898
118508038	28S ribosomal protein S36, mitochondrial, transcript variant X3	13.1676	16.3767	8.18664	8.18557	13.4849	10.451	12.4685	15.8095	14.859	8.52951	14.6698	9.04458	10.4765	4.60429	10.7655	12.0481	11.8456	10.2341	9.04022	8.00616	13.4677
118502867	28S ribosomal protein S5, mitochondrial	101.782	95.9063	99.5662	93.8272	81.4287	95.0533	69.5011	73.8061	68.7414	66.5927	67.8528	65.2207	65.6999	70.6186	70.5321	70.2591	69.2996	67.5652	75.2475	69.2261	77.7931
118511661	28S ribosomal protein S7, mitochondrial	111.447	123.538	103.222	111.494	89.339	101.139	87.1678	90.0996	97.0228	90.0011	78.9583	84.8665	81.7458	90.4024	96.6102	81.3086	77.9536	80.1655	91.5032	90.2066	91.518
118510977	28S ribosomal protein S9, mitochondrial	67.7727	63.6986	58.5485	62.2535	58.6108	62.8499	55.7786	52.7458	54.4268	53.8971	48.9638	45.5264	52.5437	54.2048	50.8999	56.1567	48.6697	47.2024	52.5214	48.6906	56.7079
118516429	28S rRNA (cytosine-C(5))-methyltransferase-like	27.9057	27.2333	32.5228	28.7978	31.5065	31.2493	27.1063	25.064	24.3279	29.5051	31.1646	33.6	33.3927	31.0016	28.4162	29.214	30.129	31.3681	40.1533	25.7557	31.141
118513082	2-acylglycerol O-acyltransferase 2-A-like, transcript variant X1	0.607297	1.72017	1.06812	1.04296	0.665054	1.65553	1.27817	1.21223	1.20968	2.20757	1.84938	0.866389	1.20141	1.29866	0.428129	0.959618	0.314096	1.52716	1.15648	2.16588	1.16569
118513082	2-acylglycerol O-acyltransferase 2-A-like, transcript variant X2	0	0.176939	0	0	0	0	0	0	0	0	0	0	0	0.13718	0	0	0.220887	0	0	0	0.138731
118513082	2-acylglycerol O-acyltransferase 2-A-like, transcript variant X3	0	0	0.210704	0	0.329549	0.163514	0.158053	0	0.299287	0.386201	0.573259	0.283626	0.216564	0.107305	0.210815	0	0.0882995	0	0.571819	0.612214	0.419876
118513082	2-acylglycerol O-acyltransferase 2-A-like, transcript variant X4	2.5849	1.43268	0.775915	3.26943	1.88138	1.94559	0.493412	1.34868	0.686685	0.181098	1.0998	1.41276	0.759116	0.748413	0.427961	0.413354	0.358287	0.563277	1.13674	1.90434	1.53547
118513082	2-acylglycerol O-acyltransferase 2-A-like, transcript variant X5	0	0	0	0	0	0	0	0	0	0	0	0	0	0	0	0	0	0	0	0	0
118511436	2-amino-3-ketobutyrate coenzyme A ligase, mitochondrial	87.2899	98.2733	71.3644	178.747	137.321	151.51	26.3029	24.8379	27.0989	100.102	113.961	84.4327	119.811	125.767	144.731	136.828	110.875	120.154	88.9807	109.072	110.217
118510578	2-aminoadipate transaminase	2.8431	2.33017	4.02623	2.53467	2.15297	2.95856	3.35248	3.26162	2.94559	4.45891	3.10004	4.45712	2.44841	3.41162	2.56704	3.04081	2.42155	1.92546	3.48335	3.91294	3.19086
118513491	2-aminoethanethiol dioxygenase	85.7966	86.0191	85.9059	69.9437	67.6614	72.5672	88.6403	94.3855	102.551	75.553	72.9099	73.0029	70.32	75.0229	76.3272	74.3294	72.8074	73.3428	69.1535	77.1653	68.9691
118506300	2-hydroxyacyl-CoA lyase 1, transcript variant X1	15.7635	20.5876	15.996	17.7934	25.803	19.3976	24.7349	23.493	21.0689	26.7744	15.1745	24.3643	20.11	20.569	18.5545	20.2404	20.0994	25.2624	24.9044	20.0857	18.7271
118506300	2-hydroxyacyl-CoA lyase 1, transcript variant X2	11.006	4.60798	8.20977	8.6184	4.23697	9.77897	4.38049	4.97537	5.78956	2.45053	9.38878	4.88061	10.5561	10.7834	12.7938	6.97166	7.97326	2.00729	3.47382	7.98261	11.3319
118506006	2-methoxy-6-polyprenyl-1,4-benzoquinol methylase, mitochondrial	40.3149	38.9582	34.4797	35.4729	30.4272	37.3854	29.2641	29.9749	29.2092	30.1134	29.9519	25.5407	30.5237	28.5316	31.7375	30.861	23.3009	27.9006	27.6954	25.6841	27.8412
118511613	2-oxo-4-hydroxy-4-carboxy-5-ureidoimidazoline decarboxylase-like, transcript variant X1	3.02323	4.68025	5.13398	6.33299	6.55805	7.28355	5.07171	2.48808	4.77459	10.598	8.34256	5.59413	7.31028	7.00671	6.68295	5.60864	6.29628	7.70896	5.79241	7.22298	6.5012
118511613	2-oxo-4-hydroxy-4-carboxy-5-ureidoimidazoline decarboxylase-like, transcript variant X2	9.43894	10.1212	5.9804	7.4637	10.2448	6.94137	2.10188	5.20504	3.92266	6.37497	5.35283	2.66182	3.95765	4.26997	6.10782	7.81786	3.78375	7.34415	7.05061	5.84923	10.0432
118512541	2-oxoglutarate and iron-dependent oxygenase domain-containing protein 3-like, transcript variant X1	85.3445	82.8592	104.525	67.3373	74.717	87.7338	127.304	110.204	103.977	99.2775	91.7581	89.162	114.914	98.7185	92.8184	91.1995	106.678	80.749	104.085	105.651	77.2692
118512541	2-oxoglutarate and iron-dependent oxygenase domain-containing protein 3-like, transcript variant X2	18.0479	21.786	20.0777	20.435	25.8475	10.4623	16.5144	37.4512	20.0686	25.8543	26.453	33.0948	14.615	26.4394	33.1021	45.6915	22.614	18.175	52.3567	34.7245	42.1192
118512598	2-oxoglutarate and iron-dependent oxygenase JMJD4 homolog	4.38267	4.17481	3.25328	4.20609	4.82693	3.65096	6.07988	5.94429	4.56485	5.36844	4.81519	4.48081	4.88462	5.11727	3.81722	5.20383	3.53081	3.71583	5.01445	3.86734	4.64198
118509527	2-oxoglutarate dehydrogenase, mitochondrial, transcript variant X1	6.91757	5.66247	7.36092	5.67144	5.41026	3.24684	16.458	11.9786	10.7427	10.0342	10.0847	9.93463	8.97879	8.03514	5.73801	6.23335	10.0095	8.20329	4.86099	8.0955	6.10223
118509527	2-oxoglutarate dehydrogenase, mitochondrial, transcript variant X2	0	0	0	0	0.234918	0	0	0	0	0	0	0	0	0	0	0	0	0	0	0.875623	0
118509527	2-oxoglutarate dehydrogenase, mitochondrial, transcript variant X3	31.1198	41.9006	76.699	40.6553	81.0773	44.1146	126.614	139.101	102.753	92.6648	91.655	129.933	78.2203	96.237	103.627	93.0278	141.546	110.204	133.073	143.422	110.832
118509527	2-oxoglutarate dehydrogenase, mitochondrial, transcript variant X4	6.61249	3.13199	6.30968	2.86497	2.85074	2.73315	7.01797	5.65764	3.74971	4.899	3.65022	2.028	3.93454	1.97715	1.6339	2.3526	1.71808	2.11062	0.757536	3.00809	2.24021
118509527	2-oxoglutarate dehydrogenase, mitochondrial, transcript variant X5	0	0	0	0	0.109684	0	0	0	0	0	0	0	0	0	0	0	0	0	0	0.29735	0
118509527	2-oxoglutarate dehydrogenase, mitochondrial, transcript variant X6	30.8701	24.6052	70.1878	21.7011	46.5608	39.9805	58.0587	71.7259	39.0488	48.8722	36.0371	29.3901	36.9886	26.0689	33.0066	38.9758	27.2285	31.4007	23.7259	59.2889	45.6659
118509527	2-oxoglutarate dehydrogenase, mitochondrial, transcript variant X7	44.9884	58.1348	86.3354	62.6016	97.6314	48.9103	91.0456	96.0419	69.4863	66.8132	61.7703	83.8235	62.2837	70.2905	71.3014	53.9578	72.4849	70.6567	84.7875	94.7714	51.9587
118508517	2-oxoisovalerate dehydrogenase subunit alpha, mitochondrial, transcript variant X1	15.6529	11.6978	12.685	12.5298	14.1818	14.4172	16.4046	15.6328	24.334	19.5342	22.0347	16.7616	37.951	29.187	40.7499	35.2138	24.4799	18.427	27.4917	28.3413	35.9161
118508517	2-oxoisovalerate dehydrogenase subunit alpha, mitochondrial, transcript variant X2	11.2688	15.2965	15.8492	16.8768	13.2911	20.8666	16.3634	15.483	20.6755	40.5757	36.0353	50.7678	43.2459	54.8376	49.3873	50.6344	53.4461	50.4513	42.6631	45.3672	44.2168
118512164	2-oxoisovalerate dehydrogenase subunit beta, mitochondrial	22.1706	20.782	25.9304	21.98	27.0541	27.2693	40.182	42.9981	46.4369	66.0455	68.4174	73.6161	84.8632	83.5017	96.7688	97.0762	104.417	92.8595	80.0076	82.8654	80.8722
118511094	2-phosphoxylose phosphatase 1	23.7353	23.6662	26.1452	26.3699	30.4485	26.9365	33.9397	32.5394	30.3058	30.2406	31.059	28.4303	29.525	27.1871	30.6736	28.8181	27.1392	27.3179	30.8668	26.4927	29.2335
118514455	3 beta-hydroxysteroid dehydrogenase/Delta 5-->4-isomerase	0.105566	0.102521	0.0814398	0.112733	0	0.140155	0	0	0.11439	0	0.0374737	0	0.0998128	0.0333695	0	0.120966	0.0299236	0	0.067996	0	0.0291849
118509868	3,4-dihydroxyphenylacetaldehyde synthase	0.383842	0.5323	0.635106	0.395762	0.454413	0.655485	0.787693	1.01056	1.60496	0.982274	1.16924	2.03063	2.07337	2.75403	2.2277	1.27243	1.96064	1.62122	1.69668	1.96311	2.08947
118507784	3'(2'),5'-bisphosphate nucleotidase 1	127.015	126.55	109.034	129.441	121.825	124.402	113.009	117.33	119.252	117.269	118.857	115.135	118.913	115.046	122.232	123.143	116.187	122.484	119.97	111.464	127.74
118512325	32 kDa beta-galactoside-binding lectin lec-3-like	0.242486	0.117522	0.422558	0.39059	0.447401	0.483772	0.403294	0.149469	0.131621	0.136363	0.259531	0.29185	0.34354	0.229237	0.12641	0.416856	0.207217	0.545134	0.352641	0.133168	0
118506692	3'-5' ssDNA/RNA exonuclease TatD, transcript variant X1	5.26208	6.54296	5.63133	5.66023	5.69991	6.63795	7.70808	7.48638	5.97656	11.7988	10.7249	11.3128	12.5302	10.2998	12.3722	9.10008	7.85765	7.48504	5.28004	6.15775	5.82287
118506692	3'-5' ssDNA/RNA exonuclease TatD, transcript variant X2	33.4125	35.761	38.2421	35.2653	37.1625	37.8817	60.5699	55.8329	63.3118	60.1684	64.6272	61.1601	65.3846	58.1814	69.1144	66.9673	57.992	59.0478	37.3163	47.7834	50.0949
118506692	3'-5' ssDNA/RNA exonuclease TatD, transcript variant X3	6.20415	4.42455	6.61752	10.9631	10.2442	6.94972	18.2134	13.0362	19.3176	21.6801	15.7659	13.6125	18.5497	23.1357	18.5651	12.2884	10.1091	17.6893	6.20998	13.3867	13.2083
118506692	3'-5' ssDNA/RNA exonuclease TatD, transcript variant X4	2.14962	3.69362	2.12204	3.52412	2.80108	4.3355	6.65167	4.99145	6.3963	6.02659	10.8058	4.37394	6.24438	7.33384	2.59191	3.47643	5.36509	6.53027	5.35777	5.02811	2.69912
118506692	3'-5' ssDNA/RNA exonuclease TatD, transcript variant X5	0.570877	0.781622	0.664883	1.14642	0.421846	0.477703	2.14382	1.26	1.58771	1.08448	2.56854	1.23966	0.894451	0.839911	1.57671	0.523662	1.4558	1.99458	0.363579	1.64809	0.42302
118506692	3'-5' ssDNA/RNA exonuclease TatD, transcript variant X6	1.80635	2.0743	0	2.11289	2.12831	2.11792	3.2025	3.72504	3.52793	4.1039	5.43096	3.03503	2.20297	2.52315	4.34887	4.10765	2.89579	2.07413	0.736743	2.25075	1.59095
118506692	3'-5' ssDNA/RNA exonuclease TatD, transcript variant X7	2.01963	0.729987	2.37381	1.44967	1.57189	1.76116	0.939295	1.83097	1.44233	1.71758	0	0	1.64832	3.30559	1.48553	6.58134	2.1683	2.14725	1.20962	3.02828	0.665285
118506692	3'-5' ssDNA/RNA exonuclease TatD, transcript variant X8	1.58459	1.4612	0	0.410208	1.01331	2.45337	1.59726	2.5002	3.0914	1.75968	1.16063	2.95719	2.59053	1.9317	0.50229	1.98293	1.97807	2.43775	1.27344	2.05753	0.948666
118506692	3'-5' ssDNA/RNA exonuclease TatD, transcript variant X9	1.4161	1.64563	2.29198	1.94262	2.98698	3.69856	5.11022	5.46843	4.59166	5.51193	3.07736	4.01458	4.11689	4.88869	3.46533	4.45207	3.50725	3.23221	3.28636	1.70545	3.38628
118509188	37 kDa salivary gland allergen Aed a 2-like	0	0	0	3.69688	0.185491	0.401093	0	0	0	0.227014	0.516313	97.9488	0	0	0	1.60934	0.172406	302.131	0.668847	192.207	0.330027
118509191	37 kDa salivary gland allergen Aed a 2-like	0	0	0	0	0	0	0	0	0	0	0	0	0	0	0	0	0	0	0	0	0
118509192	37 kDa salivary gland allergen Aed a 2-like	0.543264	0.302998	0.253375	0.792974	0.287739	0.273965	1.64239	1.34451	0.486633	1.18719	0.416747	1.54186	0.928874	0.399398	0.162707	0.504547	0.53242	1.93766	0.595606	1.94773	1.24023
118509193	37 kDa salivary gland allergen Aed a 2-like	0	0	0.11112	0.864808	0.353112	0.0954758	0	0	0	0	0.30702	37.8129	0	0	0	0.493843	0	133.971	0.463744	165.762	1.80732
118509196	37 kDa salivary gland allergen Aed a 2-like	0	0	0	2.35034	0	0	0.248399	0	0	0.252547	0.720042	142.109	0.210448	0	0	0.768118	0.191946	270.482	0.434997	63.3888	0.183204
118509486	37 kDa salivary gland allergen Aed a 2-like	192.258	157.981	145.496	199.234	158.861	248.175	128.158	131.728	159.213	155.184	200.096	194.804	157.019	138.814	157.355	128.181	93.2231	66.3966	135.416	120.878	182.932
118517249	37 kDa salivary gland allergen Aed a 2-like	0	0	0	4.38088	0.761424	0	0	0	0	0	0.79906	90.1871	0	0	0.644323	0.476071	0.177018	246.997	0.918976	240.684	0
118517253	37 kDa salivary gland allergen Aed a 2-like	0.0991145	0	0	0.539513	0	0	0	0	0	0.222616	0	22.3675	0	0	0	0.0851899	0.0845916	70.861	0	51.0133	0.340493
118517256	37 kDa salivary gland allergen Aed a 2-like	0.620485	0.200316	1.68877	11.0614	0.955986	1.44707	0	0	0	0.468172	1.55741	358.302	0.195286	0.585154	0.215706	3.02766	1.60031	942.775	1.41107	649.328	1.36036
118517258	37 kDa salivary gland allergen Aed a 2-like	0	0	0	0	0	0.202279	0	0	0	0	0.21766	26.4223	0	0	0	0	0.173911	64.1354	0	101.133	0.832114
118509194	37 kDa salivary gland allergen Aed a 2-like, transcript variant X1	0	0	0	0.339704	0	0	0	0	0	0	0	0	0	0	0	0	0	0.601832	0	0	0.172287
118517252	37 kDa salivary gland allergen Aed a 2-like, transcript variant X1	2.02181e-06	1.95067e-07	2.8685e-06	1.56501e-06	1.38423e-07	0.251933	0.802462	0.625533	1.23872e-06	0.931845	0.232662	1.61007	0.646263	0.591613	2.73876e-06	0.467208	1.15932e-06	3.14985	1.18253e-07	0	1.00986
118517254	37 kDa salivary gland allergen Aed a 2-like, transcript variant X1	0	0	0	0	0	0	0	0	0	0	0	0	0	0	0	0	0.287622	2.89218	0	0	0
118509194	37 kDa salivary gland allergen Aed a 2-like, transcript variant X2	0	0	0	0	0.188689	0	0	0	0	0	0	73.5772	0	0	0	0.985818	0	277.658	0.596855	67.5508	0
118517252	37 kDa salivary gland allergen Aed a 2-like, transcript variant X2	0.590316	0.0712319	0.697859	0.433405	0.135258	0	0	0	0.81624	0	0	0	0	0	0.688399	0	0.375363	0	0.0793896	2.08598	0
118517254	37 kDa salivary gland allergen Aed a 2-like, transcript variant X2	0	0	0	0	0	0	0	0	0	0	0	55.422	0	0	0	0.239882	0.573164	109.405	0.195075	117.964	0.164669
118511228	39S ribosomal protein L10, mitochondrial	55.4772	56.1027	54.017	58.4766	46.3958	48.1469	42.427	46.5481	42.6335	40.0466	45.0214	45.7633	45.3383	39.8662	46.3589	47.2534	34.864	43.6392	47.9039	40.6666	42.5163
118508486	39S ribosomal protein L11, mitochondrial	80.8532	91.1459	92.8013	91.8768	76.5543	82.5883	63.8963	65.6054	71.7462	66.8249	65.5926	63.217	65.1751	63.9898	67.5543	67.6278	60.608	66.0535	67.0447	62.4072	74.6226
118509080	39S ribosomal protein L13, mitochondrial	107.584	106.545	95.3072	90.7751	79.1951	100.656	70.2833	69.0353	81.4829	79.3272	73.389	80.9225	92.0276	74.7295	83.5685	90.5849	67.405	73.534	79.2402	75.8834	85.2751
118504273	39S ribosomal protein L14, mitochondrial	139.956	136.939	128.497	142.756	116.436	140.746	101.551	108.745	128.451	103.827	106.573	107.333	91.4795	105.749	97.3276	114.396	87.5207	110.207	116.067	104.344	125.838
118511828	39S ribosomal protein L16, mitochondrial	70.6292	64.1753	66.0773	69.1604	58.9297	71.807	41.5442	46.9486	49.2086	49.88	53.1196	44.9527	47.7975	50.7441	51.4861	54.0594	44.4068	43.5254	56.0964	43.9969	56.9457
118506662	39S ribosomal protein L17, mitochondrial	56.7525	57.9821	55.7747	54.6055	39.7563	53.6652	35.4458	44.7106	46.5614	40.4245	43.6339	38.8157	47.2734	39.6918	44.7255	46.706	41.2878	46.1812	54.4795	42.3879	46.2598
118512425	39S ribosomal protein L18, mitochondrial	356.05	396.833	312.381	338.926	277.373	331.761	232.488	242.939	257.434	238.618	244.813	228.221	225.701	238.918	213.34	275.607	227.384	228.233	236.752	214.818	226.438
118517567	39S ribosomal protein L19, mitochondrial, transcript variant X1	42.6542	38.7419	40.6816	40.2806	34.4748	35.7875	27.571	35.077	26.9408	26.6301	32.5961	29.9169	32.8239	31.9254	34.8845	31.3815	29.1548	26.0936	36.0491	30.5902	32.5757
118517567	39S ribosomal protein L19, mitochondrial, transcript variant X2	3.43477	2.79869	1.8664	1.86365	2.09386	3.18396	1.45476	0.953855	1.8743	3.37778	2.86043	2.90259	2.67085	2.30941	0.71831	2.44425	1.37106	1.50183	2.25778	3.13422	1.66141
118504881	39S ribosomal protein L2, mitochondrial	83.2004	88.8251	80.7509	88.2617	78.434	82.3671	55.0893	61.9833	61.0421	67.1656	66.8832	60.4271	72.174	65.1784	75.9912	71.9357	62.39	59.1229	66.826	67.7924	66.4504
118507629	39S ribosomal protein L20, mitochondrial	122.717	114.22	116.533	117.968	96.1828	126.002	91.9387	92.7467	96.884	109.221	113.028	108.884	107.13	111.906	110.374	102.763	99.5525	102.65	110.779	93.7789	102.377
118516617	39S ribosomal protein L22, mitochondrial	70.1706	60.7808	67.0934	87.259	69.8916	84.4872	34.5751	45.4658	43.1094	52.4685	57.3214	52.9075	56.2942	56.9599	55.5211	62.4213	59.6731	47.676	61.9032	51.1766	51.7055
118508306	39S ribosomal protein L27, mitochondrial	66.9364	65.3832	70.4779	71.5146	61.1788	64.2765	46.2478	40.7352	41.541	48.6681	44.5208	37.5625	49.8562	44.1456	43.789	49.1986	38.6426	42.8503	55.8816	39.6203	45.4824
118514680	39S ribosomal protein L28, mitochondrial	160.532	148.143	145.472	147.543	132.6	146.707	127.167	132.667	143.886	118.013	120.897	123.426	128.421	130.057	129.312	142.023	122.73	128.651	115.968	116.035	112.793
118508411	39S ribosomal protein L3, mitochondrial	55.0383	55.4505	63.209	50.6001	54.2489	56.7286	57.1784	63.1296	57.3244	54.2892	49.2858	48.7576	57.3001	58.3798	61.3568	60.3464	54.8231	54.8941	66.4655	62.1196	58.8798
118506097	39S ribosomal protein L30, mitochondrial	164.008	155.77	148.988	142.894	118.494	139.752	103.454	112.012	118.646	103.492	120.846	111.15	129.119	128.044	130.271	123.74	108.638	99.6491	128.01	111.996	127.226
118517495	39S ribosomal protein L32, mitochondrial	82.7771	89.8701	79.8215	79.6273	61.7524	76.3354	70.1283	72.0733	84.4021	69.1225	60.301	60.407	60.3052	62.2674	68.0619	71.4367	56.6153	60.2778	66.2958	70.8446	68.146
118506581	39S ribosomal protein L33, mitochondrial	83.7397	100.509	87.7309	89.8651	73.9287	103.532	89.8645	97.3647	104.354	91.516	96.3232	103.953	103.05	125.761	111.264	113.742	94.6409	99.4072	119.044	99.7289	104.501
118507662	39S ribosomal protein L34, mitochondrial	122.032	135.741	129.554	137.629	114.114	133.865	110.331	111.601	138.506	115.362	127.535	112.935	131.243	125.223	134.488	162.243	130.277	120.053	134.751	126.332	129.799
118506204	39S ribosomal protein L35, mitochondrial	93.2895	93.0209	80.8239	95.2558	71.7262	84.1163	56.9216	76.2428	67.2262	66.8796	74.1632	60.1747	72.8715	72.0959	71.4216	80.5054	60.4616	66.8178	73.2544	62.0619	70.0428
118506930	39S ribosomal protein L37, mitochondrial	50.2389	54.3334	50.1805	52.6461	40.0862	49.0237	33.1603	34.6639	34.7014	34.7836	36.3082	33.2073	39.8485	41.556	34.587	36.2393	34.2162	30.979	36.4627	34.1904	35.9363
118505169	39S ribosomal protein L38, mitochondrial	62.5377	61.745	60.3805	63.3698	58.2023	71.3448	53.088	56.996	57.1635	55.5762	57.6971	55.5914	62.6679	65.9147	67.7077	65.8519	62.4322	64.2192	64.792	56.3171	62.9842
118514053	39S ribosomal protein L4, mitochondrial	86.1545	85.3699	74.9087	74.3898	63.2675	76.7389	56.9723	66.3542	61.0675	68.1998	63.5158	58.7714	67.5463	62.62	67.885	67.8813	58.6187	58.1056	74.8413	63.4123	75.0741
118505360	39S ribosomal protein L40, mitochondrial	74.5602	83.7744	78.5189	85.8066	82.4047	88.1539	61.0046	72.1667	73.7922	77.5605	74.6623	72.7784	68.5061	65.8577	68.7425	75.2463	63.6583	68.8133	75.2211	80.4794	78.8391
118517571	39S ribosomal protein L41, mitochondrial	96.393	95.2388	90.7117	79.5675	66.8822	94.924	69.1295	62.1278	67.7409	69.7725	78.1725	64.654	60.7971	74.0836	72.2051	76.4541	73.6826	69.7941	74.8291	74.3202	66.4606
118511457	39S ribosomal protein L42, mitochondrial	170.073	185.443	151.628	176.196	148.535	175.025	130.31	135.947	155.189	140.751	137.164	132.783	139.807	148.451	128.491	148.683	133.45	126.514	137.016	136.418	155.261
118502913	39S ribosomal protein L43, mitochondrial	80.1197	94.3806	81.9737	80.6029	69.9513	78.7491	57.3573	60.6152	60.6825	58.2751	65.1133	54.0014	67.6476	62.212	67.4308	64.6651	56.9012	62.5554	70.4353	65.3541	72.7337
118506623	39S ribosomal protein L44, mitochondrial	54.5683	46.9013	45.9231	48.4985	41.3317	50.4671	41.1063	45.9216	42.568	39.5112	38.5476	41.2727	43.3692	46.758	46.6457	41.2548	40.1172	39.2298	46.0497	44.2645	46.0522
118508856	39S ribosomal protein L46, mitochondrial	62.4363	60.0645	57.8002	57.2406	48.0867	57.5511	35.0687	39.1375	40.5116	34.2398	34.7383	31.6458	37.8243	39.5405	39.4045	44.5015	39.5798	38.0281	34.2266	34.4659	37.9288
118506731	39S ribosomal protein L47, mitochondrial	102.159	105.236	97.8	99.8401	87.0571	92.5056	65.4416	77.2611	84.9644	73.1795	68.2861	70.903	70.3425	76.7007	73.2015	74.9448	66.6742	64.2793	83.2034	73.7188	75.9556
118502649	39S ribosomal protein L51, mitochondrial	118.789	137.484	104.39	114.246	93.9927	105.599	80.8489	89.0154	100.498	85.7987	88.7129	80.9674	89.7539	94.6972	86.2966	102.731	88.3046	82.4807	82.938	85.5838	90.6902
118512236	39S ribosomal protein L52, mitochondrial, transcript variant X1	79.7688	103.656	79.2397	78.3036	69.3541	90.3345	72.0829	75.3238	66.3414	65.0972	73.7012	66.7103	81.7381	76.9463	68.5755	83.6311	64.8199	72.5728	76.9968	61.2712	81.7746
118512236	39S ribosomal protein L52, mitochondrial, transcript variant X2	3.53656	1.7335	0	1.82935	0	4.75572	5.77577	1.77834	8.41995	2.06101	3.79862	1.50864	4.65978	4.86946	2.93131	6.8515	3.84054	1.52894	3.62074	1.96559	4.68736
118510549	39S ribosomal protein L54, mitochondrial	73.3375	77.8037	74.5641	77.6796	66.6786	76.0824	37.3624	45.7727	34.3454	41.8181	42.9737	45.1006	51.5038	50.7003	50.4361	54.8799	44.9749	43.0003	49.0528	41.2573	42.066
118502925	39S ribosomal protein L55, mitochondrial	74.2068	71.6267	70.9419	77.4849	59.9676	76.1746	46.763	48.1371	57.7891	53.5691	52.7374	48.1193	51.1917	50.6379	48.5472	52.974	50.8999	42.8426	53.4299	44.4773	52.2841
118511262	39S ribosomal protein L9, mitochondrial	86.2961	80.9822	88.4281	86.0732	76.9572	79.8714	52.6811	58.7216	62.2365	55.9961	64.5578	56.0276	63.083	63.028	57.5269	62.2414	55.4313	54.5636	61.848	65.0545	61.3233
118517562	39S ribosomal protein S30, mitochondrial	60.4831	51.8627	55.6896	50.6939	46.1039	56.2421	41.3695	50.3954	42.9005	42.3985	49.8146	42.3377	51.0027	46.3675	49.1893	50.6501	43.6892	41.9487	55.7548	45.7191	50.1224
118506790	3-hydroxyacyl-CoA dehydrogenase type-2	42.3397	41.7408	40.3838	41.6287	38.9409	45.0356	46.1537	43.102	56.7577	59.985	58.7933	62.1044	103.193	103.858	103.763	104.955	111.317	103.108	62.4039	66.1079	80.3038
118502908	3-hydroxyisobutyryl-CoA hydrolase, mitochondrial	41.4579	43.9669	49.237	38.1506	36.7849	57.4627	54.8793	49.0869	67.2603	86.6018	88.0458	122.155	171.702	170.736	186.502	185.749	169.523	147.142	125.282	133.876	152.8
118509920	3-ketoacyl-CoA thiolase, mitochondrial	102.962	97.744	97.1722	130.302	111.475	152.182	80.4827	82.768	99.2956	132.93	140.431	130.818	112.332	112.523	127.235	95.0131	94.4938	90.5081	94.4944	110.639	136.725
118502724	3-ketodihydrosphingosine reductase, transcript variant X1	7.73832	11.1101	5.34639	9.042	3.88675	12.348	9.24033	11.596	10.1548	12.5859	8.43851	10.9586	12.6229	11.6247	6.50557	11.7334	8.41004	11.6121	16.9003	14.3247	16.1034
118502724	3-ketodihydrosphingosine reductase, transcript variant X2	13.204	13.8209	16.8157	11.1675	14.1894	14.1159	8.36261	6.96715	8.32844	8.77873	13.5243	9.02166	13.1287	10.6233	15.4811	9.74954	10.258	8.37488	8.45177	7.15953	8.10363
118502724	3-ketodihydrosphingosine reductase, transcript variant X3	0	0	7.83722e-08	0	0	0	1.10475	0	0	0	0	0	0	0	0	0.608347	0	0	0	0	0.401513
118507593	3-oxoacyl-[acyl-carrier-protein] reductase FabG-like	100.429	100.214	83.2745	110.954	94.4947	121.66	77.1968	87.2272	92.2808	107.484	114.366	130.993	138.635	136.752	146.41	159.591	132.286	115.674	134.8	133.452	154.77
118507594	3-oxoacyl-[acyl-carrier-protein] reductase FabG-like	62.3234	61.2159	55.2183	119.821	75.1971	117.133	63.9502	56.1602	72.5727	90.2848	103.05	133.707	194.604	205.701	239.476	292.475	236.173	195.179	113.671	167.731	178.549
118505196	3-phosphoinositide-dependent protein kinase 1	31.6306	32.942	41.0944	34.0196	39.7014	31.8531	45.6196	49.5582	44.0038	42.053	42.411	43.7083	45.4933	44.9858	43.1952	39.2126	48.697	45.693	47.9498	42.5158	36.1929
118517440	40S ribosomal protein S10b	1785.81	1675.84	1479.55	1778.88	1526.44	1678.05	1332.06	1462.05	1695.61	1568.92	1556.32	1552.64	1519.43	1623.7	1652.4	1564.09	1463.39	1442.5	1576.73	1592.09	1693.18
118508831	40S ribosomal protein S10-like	0	0	0	0	0	0	0	0	0	0	0	0	0	0	0	0	0	0	0	0	0
118513236	40S ribosomal protein S11, transcript variant X1	3009.26	3155.22	2418.74	3198.39	2532.99	2774.82	2669.81	2749.49	3201.57	2904.71	2865.67	2810.07	2651.16	2776.2	2788.41	3077.06	2663.32	2756.86	2810.52	2676.44	2945.11
118513236	40S ribosomal protein S11, transcript variant X2	11.3103	11.5467	11.7711	14.0723	12.7364	13.3939	14.0999	8.57466	12.7166	8.08656	11.8565	11.7729	12.1993	12.5311	8.61034	5.84521	8.05563	13.3159	13.8558	9.40178	9.5726
118506643	40S ribosomal protein S12, mitochondrial	141.214	140.989	122.301	127.17	101.392	127.607	119.974	127.43	133.684	119.243	139.511	131.118	122.164	124.833	130.862	135.053	112.882	110.795	133.063	124.62	123.099
118513084	40S ribosomal protein S13	2680.56	2748.31	2116.13	2728.68	2116.27	2436.14	2560.09	2685.24	3215.98	2811.76	2748.96	2746.14	2686.87	2750.54	2855.73	2703.79	2580.26	2616.4	2739.13	2746.86	2990.33
118502896	40S ribosomal protein S14a	1470.53	1504.1	1113.86	1358.07	1064.13	1226.67	1383.65	1531.62	1725.74	1473.92	1512.47	1445.96	1216.8	1455.91	1557.02	1656.09	1374.86	1520.13	1612.66	1550.54	1555.79
118505175	40S ribosomal protein S14a, transcript variant X1	912.193	949.326	736.652	1072.2	821.613	927.268	773.736	814.586	980.726	961.545	981.442	970.198	1000.31	1051.69	1027.06	1002.16	905.181	963.901	1000.61	1006.31	1130.14
118505175	40S ribosomal protein S14a, transcript variant X2	2.31688	0.796458	2.48576	3.21024	1.47383	3.56321	2.73155	2.09505	1.74509	1.82049	3.93367	1.84006	1.52205	3.61624	3.18553	3.15082	5.07757	2.59842	1.49936	1.63293	5.42111
118504862	40S ribosomal protein S15	2983.44	3084.77	2364.96	2946.27	2285.17	2594.92	2890.08	3131.54	3744.59	3249.48	3413.89	3227.48	3094.39	3203.13	3185.52	3210.85	3021.58	2979.28	3181.97	3303.78	3396.52
118511352	40S ribosomal protein S15Aa	274.478	267.047	224.598	348.568	279.853	344.715	309.69	315.561	358.122	474.677	495.232	504.939	538.257	532.616	529.705	552.532	501.278	527.136	522.615	500.709	569.47
118510630	40S ribosomal protein S15Aa-like	2377.78	2524.9	1914.65	2355.28	1907.33	2118.39	2047.69	2035.47	2516.19	2072.73	2174.61	2111.22	1901.23	2111.83	2056.93	2079.46	1998.29	2004.68	2028.99	1928.4	2150.84
118507335	40S ribosomal protein S16	2332.11	2479.4	2003.25	2428.62	2003.21	2284.06	2213.98	2377.26	2879.94	2524.66	2465.26	2513.66	2470.11	2544.18	2622.83	2627.19	2438.94	2454.33	2577.96	2590.05	2762.45
118512298	40S ribosomal protein S17	3406.53	3326.81	2695.72	3309.02	2637.47	3004.5	2731.77	2785.35	3244.48	2760.51	3021.9	2798.83	2641.48	2697.65	2758.02	2786.46	2686.33	2731.54	2689.28	2610.77	2789
118504782	40S ribosomal protein S18	1346.02	1319.86	1154	1420.61	1219.01	1277.44	1357.05	1364.16	1593.48	1450.44	1484.98	1480.81	1406.28	1466.69	1467.57	1546.14	1436.32	1477.45	1487.92	1452.27	1581.51
118507208	40S ribosomal protein S19a, transcript variant X1	1822.26	1897.64	1486.63	1864.92	1451.78	1616.32	1691.24	1694.18	2085.11	1862.85	1892.12	1854.07	1755.83	1890.28	1809.84	1824.3	1713.28	1775.72	1769.12	1857.45	1986.09
118507208	40S ribosomal protein S19a, transcript variant X2	78.2577	72.0433	67.1134	64.6902	62.357	89.1628	61.0664	49.3847	72.9183	64.7923	56.9789	70.58	66.5189	67.4459	62.1472	64.8419	65.0698	60.9593	94.4271	65.5407	79.2741
118502653	40S ribosomal protein S2	961.877	1065.91	1056.46	968.06	1046.23	993.264	947.711	1044.65	1200.44	957.443	994.928	1148.57	1091.93	1119.73	1119.88	1212.05	1192.22	1121.39	1361.82	1310.08	1258.69
118506106	40S ribosomal protein S20	1675.76	1720.02	1348.88	1612.12	1355.42	1513.22	1613.03	1608.6	2054.61	1702.21	1729.03	1685.53	1681.05	1747.05	1727.36	1726.01	1583.44	1684.26	1608.57	1636.5	1804.93
118510781	40S ribosomal protein S21, transcript variant X1	2078.93	2529.55	1881.69	2285.55	1724.56	2044.53	2192.46	2365.26	2501.46	2452.03	2504.6	2274.49	2070.41	1997.03	2079.46	2960.14	2846.6	2876.99	3027.76	3077.23	2160.94
118510781	40S ribosomal protein S21, transcript variant X2	1565.16	1398.79	1146.99	1336.28	1312.66	1323.17	1172.17	973.831	1589.66	1108.21	1348.92	1332.63	1302.82	1641.61	1513.44	1254.13	584.56	728.226	725.721	569.73	1727.77
118505685	40S ribosomal protein S23	3693.55	3996.5	2966.4	3806.32	3093.79	3425.85	3179.55	3377.05	3992.19	3665.87	3763.23	3491.18	3397.98	3767.63	3642	3865.23	3436.47	3446.11	3477.21	3652.51	3713.33
118511525	40S ribosomal protein S24	1712.61	1841.26	1425.58	1681.37	1392.96	1581.42	1413.49	1461.21	1773.19	1505.02	1500.53	1477.76	1407.13	1483.98	1483.71	1568.69	1394.54	1489.12	1508.55	1434.24	1577.03
118508554	40S ribosomal protein S25	3265.57	3485.25	2665.22	3580.67	2697.38	3037.35	3436.34	3488.26	3981.34	3596.35	3678.26	3590.73	3203.57	3457.99	3441.98	3617.16	3236.35	3574.15	3676.27	3342.13	3721.52
118510287	40S ribosomal protein S27	2545.63	2462.79	1972.15	2544.76	2084.68	2265.58	2365.42	2427.35	2907.42	2554.67	2596.44	2456.82	2348.08	2503.33	2605.06	2350.73	2360.85	2433.35	2388.96	2469.86	2698.95
118506789	40S ribosomal protein S28, transcript variant X1	3.33429	3.39697	2.74552	3.60028	3.43874	3.59856	2.87789	3.72868	2.71519	3.0205	2.95137	3.42654	3.36713	3.85745	3.21976	2.67548	3.08627	2.58314	2.78612	3.25333	2.46297
118506789	40S ribosomal protein S28, transcript variant X2	2943.89	3245.63	2493.13	3004.34	2356.36	2645.98	2651.63	2695.15	3158.77	2906.9	2913.7	2674.64	2575.38	2731.61	2633.77	3102.39	2727.12	2830.65	2882.29	2748.6	2944.88
118506789	40S ribosomal protein S28, transcript variant X3	0	0	0	0	0	0	0	0	0	0	0	0	0.309252	0	0	0.21456	0	0	0	0	0
118506789	40S ribosomal protein S28, transcript variant X4	0	0	0	0	0	0	0.178465	0	0	0	0	0.0154277	0	0	0	0	0.0829334	0	0	0	0
118505608	40S ribosomal protein S29	3242.38	3530.75	2701.81	3225.68	2608.84	2982.66	3235.69	3582.81	3747.9	3863.68	4031.42	3603.46	3521.17	3810.01	3511.78	4336.08	3270.28	3592.96	3849.13	3560.54	3997.04
118506609	40S ribosomal protein S3	1722.6	1766.41	1390.31	1771.17	1374.28	1509.11	1600.11	1583.31	1936.12	1658.83	1655.23	1608.7	1587.69	1742.45	1776.46	1664.89	1570.86	1618.22	1608.19	1697.35	1838.89
118504258	40S ribosomal protein S3a	1991.73	2016.93	1637.96	2065.48	1641.71	1814.7	1861.19	1952.42	2364.24	2091.28	2155.76	2026	2086.15	2173.43	2171.41	2168.86	2123.31	2132.48	2123.55	2181.08	2262.01
118510167	40S ribosomal protein S4	2606.71	2682.75	2100.8	2679.79	2096.14	2304.63	2456.54	2569.17	3078.73	2578.39	2673.77	2590.15	2565.16	2680.73	2728.71	2802.44	2537.55	2604	2703.14	2804.6	2857.51
118509145	40S ribosomal protein S5, transcript variant X1	2085.44	2018.98	1734.33	2038.87	1678.45	1880.02	1956.43	2099.86	2473.58	2169.15	2124.9	2115.24	2057.12	2234.89	2260.56	2295.73	2184.96	2229.24	2237.18	2277.29	2424.42
118509145	40S ribosomal protein S5, transcript variant X2	11.4061	17.1738	11.0916	13.4119	14.5908	13.3944	11.949	17.5418	9.99515	12.9227	15.4698	12.801	25.1501	18.6967	16.5833	13.218	13.0873	17.5282	20.8571	17.5372	26.4524
118509145	40S ribosomal protein S5, transcript variant X3	9.40839	6.49996	9.25392	7.08423	8.79398	8.89874	15.8518	13.3388	12.2103	17.4343	16.778	15.881	21.8438	16.7629	14.0856	13.0303	11.9459	18.1299	15.2308	10.9408	12.605
118507659	40S ribosomal protein S6	1780.71	1820.86	1586.77	1792.97	1512.14	1657.44	1549.92	1710.56	1906.19	1657.61	1636.06	1586.94	1528.42	1598.37	1699.02	1582.1	1642.76	1638.11	1693.68	1720.26	1805.48
118506104	40S ribosomal protein S7	1562.59	1653.96	1296.34	1657.8	1324.73	1471.57	1618.73	1646.54	2007.4	1742.31	1743.4	1728.42	1731	1872.2	1873.81	1828.14	1672.54	1770.73	1803.08	1839.62	2015.2
118508369	40S ribosomal protein S8	3115.82	3280.22	2514.39	3088.2	2496.07	2740.62	2643.42	2763.61	3382.41	2758.35	2839.3	2758.83	2575.42	2857.95	2835.01	2870.41	2641.69	2753.15	2692.6	2774.78	2880.27
118509763	40S ribosomal protein S9, transcript variant X1	1680.48	1785.85	1404.18	1786.37	1418.86	1577.07	1294.61	1358.43	1619.33	1547.69	1601.82	1573.52	1557.34	1628.04	1597.36	1547.51	1431.32	1469.33	1524.3	1544.87	1747.4
118509763	40S ribosomal protein S9, transcript variant X2	9.09212	8.00983	2.90603	7.40334	9.29996	7.99099	15.7537	13.9516	12.0701	8.17797	14.3782	15.8023	19.7118	16.9487	18.6168	9.35148	11.8937	15.0313	18.7512	10.5487	18.2374
118509763	40S ribosomal protein S9, transcript variant X3	7.05216	8.84533	11.9564	10.605	7.82967	7.97254	13.6862	8.7447	7.35027	11.848	13.8515	17.3896	21.4364	15.9484	16.9559	12.2312	12.1646	16.5122	16.1679	9.91125	16.6047
118506277	40S ribosomal protein SA	1271.7	1346.11	1035.23	1279.25	1048.13	1136.72	984.145	1082.55	1304.54	1108.35	1156.6	1130.28	1164.18	1215.32	1298.76	1198.38	1089.17	1110.26	1210.62	1262.33	1338.17
118512989	46 kDa FK506-binding nuclear protein	161.59	146.993	154.625	150.4	142.75	175.37	153.375	180.131	175.086	161.634	192.334	201.561	218.477	203.696	215.392	182.591	182.451	176.433	275.244	200.499	224.649
118514253	4-aminobutyrate aminotransferase, mitochondrial	1408.12	1370.18	1510.01	1228.31	1339.15	1263.65	1356.13	1312.54	1471.46	1033.67	999.97	1077.89	811.769	828.984	919.24	903.07	920.779	847.226	783.335	1027.42	953.678
118507783	4-coumarate--CoA ligase 1	47.8353	50.8446	49.3652	51.3829	54.5101	60.2331	57.0834	58.7523	53.9561	59.898	59.7889	56.5998	65.494	62.2668	59.1584	62.934	58.2364	58.6893	59.5407	54.9953	55.9491
118505145	4-coumarate--CoA ligase 1-like	0.250094	0.242801	0.0579202	0.0801984	0.0920995	0.149464	0.221027	0.368632	0.216868	0.727764	0.373189	0.298595	0.236423	0.663704	0.781506	0.343902	0.383135	0.448015	0.386843	0.216861	0
118506183	4-coumarate--CoA ligase 1-like	0.0605269	0.0293935	0.0700251	0.0969229	0.0556925	0.0301314	0.166994	0.111405	0.131158	0.0676503	0.193316	0.108157	0.114463	0.114816	0.0630281	0.0520167	0.102912	0.162462	0.233868	0.0326829	0.10043
118506184	4-coumarate--CoA ligase 1-like	5.86624	4.25829	5.08003	4.32233	5.15788	5.21171	3.91225	2.85668	4.46846	2.36644	3.15495	3.21902	4.49626	2.75466	2.58737	2.27101	3.28401	2.17781	2.70815	2.46446	2.80217
118506185	4-coumarate--CoA ligase 1-like	7.60402	7.33408	10.6467	8.48642	6.77179	12.8213	6.20405	7.20336	7.05701	5.78481	8.52838	9.61236	9.58451	9.37396	9.21462	9.35419	8.41729	9.52613	8.31195	8.83403	10.7487
118514549	4-coumarate--CoA ligase 1-like	22.9304	15.7513	39.2848	16.0215	17.8381	28.6444	24.6457	66.7576	74.7924	28.7432	48.8632	80.9763	31.5436	29.5106	38.0842	14.5446	28.4242	20.6493	28.1795	41.3447	28.4572
118510358	4-coumarate--CoA ligase 3-like	0.292184	0.283612	0.676938	0.609351	0.484314	0.349299	1.2271	1.00534	0.760233	1.30883	1.24631	1.25704	1.43616	0.996642	1.46102	1.10491	0.497587	1.36151	0.960714	0.444069	1.16151
118512522	4-coumarate--CoA ligase-like 7	0	0.0481993	0	0	0	0	0.109689	0	0	0	0	0	0	0	0	0	0	0.0444672	0	0	0
118517615	4-hydroxybutyrate coenzyme A transferase	193.156	206.878	287.261	185.189	267.097	193.725	145.711	155.198	149.566	130.227	130.506	143.585	127.305	136.424	150.576	139.279	153.208	138.546	141.881	161.14	142.48
118512320	4-hydroxyphenylpyruvate dioxygenase	2.38279	1.66181	2.41699	3.22863	1.64644	2.07779	0.24709	1.09895	0.56528	4.09053	0.874267	0.445739	12.6669	5.35894	8.45707	11.7756	10.2174	28.985	2.37789	4.21599	2.5875
118517337	4'-phosphopantetheine phosphatase-like	7.41743	6.82128	8.21698	8.97388	7.26054	8.33428	7.89306	6.80545	8.06733	9.95337	7.6386	7.35039	9.35978	8.68014	9.50676	8.65679	7.54703	9.28132	7.26153	8.52106	8.58833
118511192	4'-phosphopantetheine phosphatase-like, transcript variant X1	0.617093	0	0.552984	0.220212	0	0	0.258856	0	0.228889	0	0.246995	0.297807	0.215226	1.61978	0.27545	0	0.6442	0.705376	0.432775	0	0.412371
118511192	4'-phosphopantetheine phosphatase-like, transcript variant X2	0	0	0.46686	0	0.415359	0	0	0	0.423291	0	0	3.09979e-09	0	0	0	0	0	0	0	0	0
118511192	4'-phosphopantetheine phosphatase-like, transcript variant X3	9.06027	10.512	7.07494	9.80431	8.09585	10.968	11.1241	11.2322	11.3414	10.4218	8.87184	10.0338	11.2204	11.7909	10.8607	12.3559	7.2394	7.2968	9.05399	9.27711	9.95097
118515275	5.8S ribosomal RNA	102.195	109.307	68.2608	96.2558	77.4369	74.2019	112.438	74.8359	90.9597	102.409	92.4747	83.8817	87.8489	100.189	89.2699	90.1211	83.8658	82.205	76.5406	72.1432	137.548
118515276	5.8S ribosomal RNA	102.195	109.307	68.2608	96.2558	77.4369	74.2019	112.438	74.8359	90.9597	102.409	92.4747	83.8817	87.8489	100.189	89.2699	90.1211	83.8658	82.205	76.5406	72.1432	137.548
118515277	5.8S ribosomal RNA	102.195	109.307	68.2608	96.2558	77.4369	74.2019	112.438	74.8359	90.9597	102.409	92.4747	83.8817	87.8489	100.189	89.2699	90.1211	83.8658	82.205	76.5406	72.1432	137.548
118515278	5.8S ribosomal RNA	102.195	109.307	68.2608	96.2558	77.4369	74.2019	112.438	74.8359	90.9597	102.409	92.4747	83.8817	87.8489	100.189	89.2699	90.1211	83.8658	82.205	76.5406	72.1432	137.548
118515279	5.8S ribosomal RNA	102.195	109.307	68.2608	96.2558	77.4369	74.2019	112.438	74.8359	90.9597	102.409	92.4747	83.8817	87.8489	100.189	89.2699	90.1211	83.8658	82.205	76.5406	72.1432	137.548
118515281	5.8S ribosomal RNA	102.195	109.307	68.2608	96.2558	77.4369	74.2019	112.438	74.8359	90.9597	102.409	92.4747	83.8817	87.8489	100.189	89.2699	90.1211	83.8658	82.205	76.5406	72.1432	137.548
118515282	5.8S ribosomal RNA	102.195	109.307	68.2608	96.2558	77.4369	74.2019	112.438	74.8359	90.9597	102.409	92.4747	83.8817	87.8489	100.189	89.2699	90.1211	83.8658	82.205	76.5406	72.1432	137.548
118515290	5.8S ribosomal RNA	102.195	109.307	68.2608	96.2558	77.4369	74.2019	112.438	74.8359	90.9597	102.409	92.4747	83.8817	87.8489	100.189	89.2699	90.1211	83.8658	82.205	76.5406	72.1432	137.548
118515291	5.8S ribosomal RNA	102.195	109.307	68.2608	96.2558	77.4369	74.2019	112.438	74.8359	90.9597	102.409	92.4747	83.8817	87.8489	100.189	89.2699	90.1211	83.8658	82.205	76.5406	72.1432	137.548
118515322	5.8S ribosomal RNA	102.195	109.307	68.2608	96.2558	77.4369	74.2019	112.438	74.8359	90.9597	102.409	92.4747	83.8817	87.8489	100.189	89.2699	90.1211	83.8658	82.205	76.5406	72.1432	137.548
118515326	5.8S ribosomal RNA	102.195	109.307	68.2608	96.2558	77.4369	74.2019	112.438	74.8359	90.9597	102.409	92.4747	83.8817	87.8489	100.189	89.2699	90.1211	83.8658	82.205	76.5406	72.1432	137.548
118515327	5.8S ribosomal RNA	102.195	109.307	68.2608	96.2558	77.4369	74.2019	112.438	74.8359	90.9597	102.409	92.4747	83.8817	87.8489	100.189	89.2699	90.1211	83.8658	82.205	76.5406	72.1432	137.548
118515328	5.8S ribosomal RNA	102.195	109.307	68.2608	96.2558	77.4369	74.2019	112.438	74.8359	90.9597	102.409	92.4747	83.8817	87.8489	100.189	89.2699	90.1211	83.8658	82.205	76.5406	72.1432	137.548
118515329	5.8S ribosomal RNA	102.195	109.307	68.2608	96.2558	77.4369	74.2019	112.438	74.8359	90.9597	102.409	92.4747	83.8817	87.8489	100.189	89.2699	90.1211	83.8658	82.205	76.5406	72.1432	137.548
118515330	5.8S ribosomal RNA	102.195	109.307	68.2608	96.2558	77.4369	74.2019	112.438	74.8359	90.9597	102.409	92.4747	83.8817	87.8489	100.189	89.2699	90.1211	83.8658	82.205	76.5406	72.1432	137.548
118515331	5.8S ribosomal RNA	102.195	109.307	68.2608	96.2558	77.4369	74.2019	112.438	74.8359	90.9597	102.409	92.4747	83.8817	87.8489	100.189	89.2699	90.1211	83.8658	82.205	76.5406	72.1432	137.548
118515332	5.8S ribosomal RNA	102.195	109.307	68.2608	96.2558	77.4369	74.2019	112.438	74.8359	90.9597	102.409	92.4747	83.8817	87.8489	100.189	89.2699	90.1211	83.8658	82.205	76.5406	72.1432	137.548
118515333	5.8S ribosomal RNA	102.195	109.307	68.2608	96.2558	77.4369	74.2019	112.438	74.8359	90.9597	102.409	92.4747	83.8817	87.8489	100.189	89.2699	90.1211	83.8658	82.205	76.5406	72.1432	137.548
118515334	5.8S ribosomal RNA	102.195	109.307	68.2608	96.2558	77.4369	74.2019	112.438	74.8359	90.9597	102.409	92.4747	83.8817	87.8489	100.189	89.2699	90.1211	83.8658	82.205	76.5406	72.1432	137.548
118515335	5.8S ribosomal RNA	102.195	109.307	68.2608	96.2558	77.4369	74.2019	112.438	74.8359	90.9597	102.409	92.4747	83.8817	87.8489	100.189	89.2699	90.1211	83.8658	82.205	76.5406	72.1432	137.548
118515336	5.8S ribosomal RNA	102.195	109.307	68.2608	96.2558	77.4369	74.2019	112.438	74.8359	90.9597	102.409	92.4747	83.8817	87.8489	100.189	89.2699	90.1211	83.8658	82.205	76.5406	72.1432	137.548
118515337	5.8S ribosomal RNA	9.36211	19.9823	5.5964	14.2814	11.2332	14.8946	22.3828	3.88143	13.3175	12.2711	15.1296	7.6926	11.9682	14.5864	12.833	16.3344	20.5875	189.788	17.7282	12.375	22.1501
118515338	5.8S ribosomal RNA	102.195	109.307	68.2608	96.2558	77.4369	74.2019	112.438	74.8359	90.9597	102.409	92.4747	83.8817	87.8489	100.189	89.2699	90.1211	83.8658	82.205	76.5406	72.1432	137.548
118515339	5.8S ribosomal RNA	102.195	109.307	68.2608	96.2558	77.4369	74.2019	112.438	74.8359	90.9597	102.409	92.4747	83.8817	87.8489	100.189	89.2699	90.1211	83.8658	82.205	76.5406	72.1432	137.548
118515340	5.8S ribosomal RNA	102.195	109.307	68.2608	96.2558	77.4369	74.2019	112.438	74.8359	90.9597	102.409	92.4747	83.8817	87.8489	100.189	89.2699	90.1211	83.8658	82.205	76.5406	72.1432	137.548
118515351	5.8S ribosomal RNA	102.195	109.307	68.2608	96.2558	77.4369	74.2019	112.438	74.8359	90.9597	102.409	92.4747	83.8817	87.8489	100.189	89.2699	90.1211	83.8658	82.205	76.5406	72.1432	137.548
118515356	5.8S ribosomal RNA	102.195	109.307	68.2608	96.2558	77.4369	74.2019	112.438	74.8359	90.9597	102.409	92.4747	83.8817	87.8489	100.189	89.2699	90.1211	83.8658	82.205	76.5406	72.1432	137.548
118515358	5.8S ribosomal RNA	102.195	109.307	68.2608	96.2558	77.4369	74.2019	112.438	74.8359	90.9597	102.409	92.4747	83.8817	87.8489	100.189	89.2699	90.1211	83.8658	82.205	76.5406	72.1432	137.548
118515360	5.8S ribosomal RNA	102.195	109.307	68.2608	96.2558	77.4369	74.2019	112.438	74.8359	90.9597	102.409	92.4747	83.8817	87.8489	100.189	89.2699	90.1211	83.8658	82.205	76.5406	72.1432	137.548
118515362	5.8S ribosomal RNA	102.195	109.307	68.2608	96.2558	77.4369	74.2019	112.438	74.8359	90.9597	102.409	92.4747	83.8817	87.8489	100.189	89.2699	90.1211	83.8658	82.205	76.5406	72.1432	137.548
118515365	5.8S ribosomal RNA	102.195	109.307	68.2608	96.2558	77.4369	74.2019	112.438	74.8359	90.9597	102.409	92.4747	83.8817	87.8489	100.189	89.2699	90.1211	83.8658	82.205	76.5406	72.1432	137.548
118515366	5.8S ribosomal RNA	102.195	109.307	68.2608	96.2558	77.4369	74.2019	112.438	74.8359	90.9597	102.409	92.4747	83.8817	87.8489	100.189	89.2699	90.1211	83.8658	82.205	76.5406	72.1432	137.548
118515367	5.8S ribosomal RNA	102.195	109.307	68.2608	96.2558	77.4369	74.2019	112.438	74.8359	90.9597	102.409	92.4747	83.8817	87.8489	100.189	89.2699	90.1211	83.8658	82.205	76.5406	72.1432	137.548
118515368	5.8S ribosomal RNA	102.195	109.307	68.2608	96.2558	77.4369	74.2019	112.438	74.8359	90.9597	102.409	92.4747	83.8817	87.8489	100.189	89.2699	90.1211	83.8658	82.205	76.5406	72.1432	137.548
118515369	5.8S ribosomal RNA	102.195	109.307	68.2608	96.2558	77.4369	74.2019	112.438	74.8359	90.9597	102.409	92.4747	83.8817	87.8489	100.189	89.2699	90.1211	83.8658	82.205	76.5406	72.1432	137.548
118515370	5.8S ribosomal RNA	102.195	109.307	68.2608	96.2558	77.4369	74.2019	112.438	74.8359	90.9597	102.409	92.4747	83.8817	87.8489	100.189	89.2699	90.1211	83.8658	82.205	76.5406	72.1432	137.548
118515371	5.8S ribosomal RNA	9.36211	19.9823	5.5964	14.2814	11.2332	14.8946	22.3828	3.88143	13.3175	12.2711	15.1296	7.6926	11.9682	14.5864	12.833	16.3344	20.5875	189.788	17.7282	12.375	22.1501
118515372	5.8S ribosomal RNA	16.3978	19.4826	3.96555	19.4966	18.7958	0	29.4405	8.4011	10.9873	11.2792	29.1452	4.15988	6.45152	9.38497	17.2102	18.1787	5.27743	19.4807	11.8791	6.81735	35.6627
118515373	5.8S ribosomal RNA	102.195	109.307	68.2608	96.2558	77.4369	74.2019	112.438	74.8359	90.9597	102.409	92.4747	83.8817	87.8489	100.189	89.2699	90.1211	83.8658	82.205	76.5406	72.1432	137.548
118515374	5.8S ribosomal RNA	102.195	109.307	68.2608	96.2558	77.4369	74.2019	112.438	74.8359	90.9597	102.409	92.4747	83.8817	87.8489	100.189	89.2699	90.1211	83.8658	82.205	76.5406	72.1432	137.548
118515380	5.8S ribosomal RNA	102.195	109.307	68.2608	96.2558	77.4369	74.2019	112.438	74.8359	90.9597	102.409	92.4747	83.8817	87.8489	100.189	89.2699	90.1211	83.8658	82.205	76.5406	72.1432	137.548
118515386	5.8S ribosomal RNA	102.195	109.307	68.2608	96.2558	77.4369	74.2019	112.438	74.8359	90.9597	102.409	92.4747	83.8817	87.8489	100.189	89.2699	90.1211	83.8658	82.205	76.5406	72.1432	137.548
118515387	5.8S ribosomal RNA	102.195	109.307	68.2608	96.2558	77.4369	74.2019	112.438	74.8359	90.9597	102.409	92.4747	83.8817	87.8489	100.189	89.2699	90.1211	83.8658	82.205	76.5406	72.1432	137.548
118515388	5.8S ribosomal RNA	6.80104	0	0	0	0	0	0	0	0	7.51895	14.8666	16.973	26.3214	6.33971	14.0004	33.4816	24.2994	12.5896	19.9222	7.99312	17.0718
118515389	5.8S ribosomal RNA	102.195	109.307	68.2608	96.2558	77.4369	74.2019	112.438	74.8359	90.9597	102.409	92.4747	83.8817	87.8489	100.189	89.2699	90.1211	83.8658	82.205	76.5406	72.1432	137.548
118515396	5.8S ribosomal RNA	102.195	109.307	68.2608	96.2558	77.4369	74.2019	112.438	74.8359	90.9597	102.409	92.4747	83.8817	87.8489	100.189	89.2699	90.1211	83.8658	82.205	76.5406	72.1432	137.548
118515397	5.8S ribosomal RNA	102.195	109.307	68.2608	96.2558	77.4369	74.2019	112.438	74.8359	90.9597	102.409	92.4747	83.8817	87.8489	100.189	89.2699	90.1211	83.8658	82.205	76.5406	72.1432	137.548
118515398	5.8S ribosomal RNA	3.91354	3.87809	4.7895	13.353	3.76993	7.74449	8.96169	5.12497	13.3321	9.15289	8.89328	20.2043	7.65034	0	0	26.0578	3.37943	3.55674	7.58587	4.37701	12.9014
118515399	5.8S ribosomal RNA	102.195	109.307	68.2608	96.2558	77.4369	74.2019	112.438	74.8359	90.9597	102.409	92.4747	83.8817	87.8489	100.189	89.2699	90.1211	83.8658	82.205	76.5406	72.1432	137.548
118515404	5.8S ribosomal RNA	102.195	109.307	68.2608	96.2558	77.4369	74.2019	112.438	74.8359	90.9597	102.409	92.4747	83.8817	87.8489	100.189	89.2699	90.1211	83.8658	82.205	76.5406	72.1432	137.548
118515405	5.8S ribosomal RNA	102.195	109.307	68.2608	96.2558	77.4369	74.2019	112.438	74.8359	90.9597	102.409	92.4747	83.8817	87.8489	100.189	89.2699	90.1211	83.8658	82.205	76.5406	72.1432	137.548
118515406	5.8S ribosomal RNA	102.195	109.307	68.2608	96.2558	77.4369	74.2019	112.438	74.8359	90.9597	102.409	92.4747	83.8817	87.8489	100.189	89.2699	90.1211	83.8658	82.205	76.5406	72.1432	137.548
118515407	5.8S ribosomal RNA	10.2093	9.61252	5.94703	3.93313	0	18.8763	0	11.4727	10.2054	15.9942	10.0484	11.5952	4.53381	13.2784	4.85732	22.3384	15.7796	20.6198	36.3281	0	4.00254
118515408	5.8S ribosomal RNA	102.195	109.307	68.2608	96.2558	77.4369	74.2019	112.438	74.8359	90.9597	102.409	92.4747	83.8817	87.8489	100.189	89.2699	90.1211	83.8658	82.205	76.5406	72.1432	137.548
118515411	5.8S ribosomal RNA	102.195	109.307	68.2608	96.2558	77.4369	74.2019	112.438	74.8359	90.9597	102.409	92.4747	83.8817	87.8489	100.189	89.2699	90.1211	83.8658	82.205	76.5406	72.1432	137.548
118515412	5.8S ribosomal RNA	102.195	109.307	68.2608	96.2558	77.4369	74.2019	112.438	74.8359	90.9597	102.409	92.4747	83.8817	87.8489	100.189	89.2699	90.1211	83.8658	82.205	76.5406	72.1432	137.548
118515418	5.8S ribosomal RNA	102.195	109.307	68.2608	96.2558	77.4369	74.2019	112.438	74.8359	90.9597	102.409	92.4747	83.8817	87.8489	100.189	89.2699	90.1211	83.8658	82.205	76.5406	72.1432	137.548
118515422	5.8S ribosomal RNA	102.195	109.307	68.2608	96.2558	77.4369	74.2019	112.438	74.8359	90.9597	102.409	92.4747	83.8817	87.8489	100.189	89.2699	90.1211	83.8658	82.205	76.5406	72.1432	137.548
118515424	5.8S ribosomal RNA	102.195	109.307	68.2608	96.2558	77.4369	74.2019	112.438	74.8359	90.9597	102.409	92.4747	83.8817	87.8489	100.189	89.2699	90.1211	83.8658	82.205	76.5406	72.1432	137.548
118515425	5.8S ribosomal RNA	102.195	109.307	68.2608	96.2558	77.4369	74.2019	112.438	74.8359	90.9597	102.409	92.4747	83.8817	87.8489	100.189	89.2699	90.1211	83.8658	82.205	76.5406	72.1432	137.548
118515426	5.8S ribosomal RNA	102.195	109.307	68.2608	96.2558	77.4369	74.2019	112.438	74.8359	90.9597	102.409	92.4747	83.8817	87.8489	100.189	89.2699	90.1211	83.8658	82.205	76.5406	72.1432	137.548
118515427	5.8S ribosomal RNA	102.195	109.307	68.2608	96.2558	77.4369	74.2019	112.438	74.8359	90.9597	102.409	92.4747	83.8817	87.8489	100.189	89.2699	90.1211	83.8658	82.205	76.5406	72.1432	137.548
118515433	5.8S ribosomal RNA	102.195	109.307	68.2608	96.2558	77.4369	74.2019	112.438	74.8359	90.9597	102.409	92.4747	83.8817	87.8489	100.189	89.2699	90.1211	83.8658	82.205	76.5406	72.1432	137.548
118515434	5.8S ribosomal RNA	102.195	109.307	68.2608	96.2558	77.4369	74.2019	112.438	74.8359	90.9597	102.409	92.4747	83.8817	87.8489	100.189	89.2699	90.1211	83.8658	82.205	76.5406	72.1432	137.548
118515435	5.8S ribosomal RNA	102.195	109.307	68.2608	96.2558	77.4369	74.2019	112.438	74.8359	90.9597	102.409	92.4747	83.8817	87.8489	100.189	89.2699	90.1211	83.8658	82.205	76.5406	72.1432	137.548
118515436	5.8S ribosomal RNA	102.195	109.307	68.2608	96.2558	77.4369	74.2019	112.438	74.8359	90.9597	102.409	92.4747	83.8817	87.8489	100.189	89.2699	90.1211	83.8658	82.205	76.5406	72.1432	137.548
118515437	5.8S ribosomal RNA	102.195	109.307	68.2608	96.2558	77.4369	74.2019	112.438	74.8359	90.9597	102.409	92.4747	83.8817	87.8489	100.189	89.2699	90.1211	83.8658	82.205	76.5406	72.1432	137.548
118515438	5.8S ribosomal RNA	102.195	109.307	68.2608	96.2558	77.4369	74.2019	112.438	74.8359	90.9597	102.409	92.4747	83.8817	87.8489	100.189	89.2699	90.1211	83.8658	82.205	76.5406	72.1432	137.548
118515439	5.8S ribosomal RNA	102.195	109.307	68.2608	96.2558	77.4369	74.2019	112.438	74.8359	90.9597	102.409	92.4747	83.8817	87.8489	100.189	89.2699	90.1211	83.8658	82.205	76.5406	72.1432	137.548
118515440	5.8S ribosomal RNA	102.195	109.307	68.2608	96.2558	77.4369	74.2019	112.438	74.8359	90.9597	102.409	92.4747	83.8817	87.8489	100.189	89.2699	90.1211	83.8658	82.205	76.5406	72.1432	137.548
118515445	5.8S ribosomal RNA	102.195	109.307	68.2608	96.2558	77.4369	74.2019	112.438	74.8359	90.9597	102.409	92.4747	83.8817	87.8489	100.189	89.2699	90.1211	83.8658	82.205	76.5406	72.1432	137.548
118515451	5.8S ribosomal RNA	102.195	109.307	68.2608	96.2558	77.4369	74.2019	112.438	74.8359	90.9597	102.409	92.4747	83.8817	87.8489	100.189	89.2699	90.1211	83.8658	82.205	76.5406	72.1432	137.548
118515452	5.8S ribosomal RNA	102.195	109.307	68.2608	96.2558	77.4369	74.2019	112.438	74.8359	90.9597	102.409	92.4747	83.8817	87.8489	100.189	89.2699	90.1211	83.8658	82.205	76.5406	72.1432	137.548
118515453	5.8S ribosomal RNA	102.195	109.307	68.2608	96.2558	77.4369	74.2019	112.438	74.8359	90.9597	102.409	92.4747	83.8817	87.8489	100.189	89.2699	90.1211	83.8658	82.205	76.5406	72.1432	137.548
118515456	5.8S ribosomal RNA	102.195	109.307	68.2608	96.2558	77.4369	74.2019	112.438	74.8359	90.9597	102.409	92.4747	83.8817	87.8489	100.189	89.2699	90.1211	83.8658	82.205	76.5406	72.1432	137.548
118515457	5.8S ribosomal RNA	102.195	109.307	68.2608	96.2558	77.4369	74.2019	112.438	74.8359	90.9597	102.409	92.4747	83.8817	87.8489	100.189	89.2699	90.1211	83.8658	82.205	76.5406	72.1432	137.548
118515462	5.8S ribosomal RNA	102.195	109.307	68.2608	96.2558	77.4369	74.2019	112.438	74.8359	90.9597	102.409	92.4747	83.8817	87.8489	100.189	89.2699	90.1211	83.8658	82.205	76.5406	72.1432	137.548
118515464	5.8S ribosomal RNA	102.195	109.307	68.2608	96.2558	77.4369	74.2019	112.438	74.8359	90.9597	102.409	92.4747	83.8817	87.8489	100.189	89.2699	90.1211	83.8658	82.205	76.5406	72.1432	137.548
118515465	5.8S ribosomal RNA	102.195	109.307	68.2608	96.2558	77.4369	74.2019	112.438	74.8359	90.9597	102.409	92.4747	83.8817	87.8489	100.189	89.2699	90.1211	83.8658	82.205	76.5406	72.1432	137.548
118515469	5.8S ribosomal RNA	102.195	109.307	68.2608	96.2558	77.4369	74.2019	112.438	74.8359	90.9597	102.409	92.4747	83.8817	87.8489	100.189	89.2699	90.1211	83.8658	82.205	76.5406	72.1432	137.548
118515470	5.8S ribosomal RNA	102.195	109.307	68.2608	96.2558	77.4369	74.2019	112.438	74.8359	90.9597	102.409	92.4747	83.8817	87.8489	100.189	89.2699	90.1211	83.8658	82.205	76.5406	72.1432	137.548
118515472	5.8S ribosomal RNA	102.195	109.307	68.2608	96.2558	77.4369	74.2019	112.438	74.8359	90.9597	102.409	92.4747	83.8817	87.8489	100.189	89.2699	90.1211	83.8658	82.205	76.5406	72.1432	137.548
118515476	5.8S ribosomal RNA	102.195	109.307	68.2608	96.2558	77.4369	74.2019	112.438	74.8359	90.9597	102.409	92.4747	83.8817	87.8489	100.189	89.2699	90.1211	83.8658	82.205	76.5406	72.1432	137.548
118515477	5.8S ribosomal RNA	102.195	109.307	68.2608	96.2558	77.4369	74.2019	112.438	74.8359	90.9597	102.409	92.4747	83.8817	87.8489	100.189	89.2699	90.1211	83.8658	82.205	76.5406	72.1432	137.548
118515482	5.8S ribosomal RNA	102.195	109.307	68.2608	96.2558	77.4369	74.2019	112.438	74.8359	90.9597	102.409	92.4747	83.8817	87.8489	100.189	89.2699	90.1211	83.8658	82.205	76.5406	72.1432	137.548
118515483	5.8S ribosomal RNA	102.195	109.307	68.2608	96.2558	77.4369	74.2019	112.438	74.8359	90.9597	102.409	92.4747	83.8817	87.8489	100.189	89.2699	90.1211	83.8658	82.205	76.5406	72.1432	137.548
118515484	5.8S ribosomal RNA	102.195	109.307	68.2608	96.2558	77.4369	74.2019	112.438	74.8359	90.9597	102.409	92.4747	83.8817	87.8489	100.189	89.2699	90.1211	83.8658	82.205	76.5406	72.1432	137.548
118515485	5.8S ribosomal RNA	102.195	109.307	68.2608	96.2558	77.4369	74.2019	112.438	74.8359	90.9597	102.409	92.4747	83.8817	87.8489	100.189	89.2699	90.1211	83.8658	82.205	76.5406	72.1432	137.548
118515493	5.8S ribosomal RNA	102.195	109.307	68.2608	96.2558	77.4369	74.2019	112.438	74.8359	90.9597	102.409	92.4747	83.8817	87.8489	100.189	89.2699	90.1211	83.8658	82.205	76.5406	72.1432	137.548
118515494	5.8S ribosomal RNA	102.195	109.307	68.2608	96.2558	77.4369	74.2019	112.438	74.8359	90.9597	102.409	92.4747	83.8817	87.8489	100.189	89.2699	90.1211	83.8658	82.205	76.5406	72.1432	137.548
118515495	5.8S ribosomal RNA	102.195	109.307	68.2608	96.2558	77.4369	74.2019	112.438	74.8359	90.9597	102.409	92.4747	83.8817	87.8489	100.189	89.2699	90.1211	83.8658	82.205	76.5406	72.1432	137.548
118515496	5.8S ribosomal RNA	102.195	109.307	68.2608	96.2558	77.4369	74.2019	112.438	74.8359	90.9597	102.409	92.4747	83.8817	87.8489	100.189	89.2699	90.1211	83.8658	82.205	76.5406	72.1432	137.548
118515502	5.8S ribosomal RNA	102.195	109.307	68.2608	96.2558	77.4369	74.2019	112.438	74.8359	90.9597	102.409	92.4747	83.8817	87.8489	100.189	89.2699	90.1211	83.8658	82.205	76.5406	72.1432	137.548
118515503	5.8S ribosomal RNA	102.195	109.307	68.2608	96.2558	77.4369	74.2019	112.438	74.8359	90.9597	102.409	92.4747	83.8817	87.8489	100.189	89.2699	90.1211	83.8658	82.205	76.5406	72.1432	137.548
118515504	5.8S ribosomal RNA	102.195	109.307	68.2608	96.2558	77.4369	74.2019	112.438	74.8359	90.9597	102.409	92.4747	83.8817	87.8489	100.189	89.2699	90.1211	83.8658	82.205	76.5406	72.1432	137.548
118515505	5.8S ribosomal RNA	102.195	109.307	68.2608	96.2558	77.4369	74.2019	112.438	74.8359	90.9597	102.409	92.4747	83.8817	87.8489	100.189	89.2699	90.1211	83.8658	82.205	76.5406	72.1432	137.548
118515506	5.8S ribosomal RNA	102.195	109.307	68.2608	96.2558	77.4369	74.2019	112.438	74.8359	90.9597	102.409	92.4747	83.8817	87.8489	100.189	89.2699	90.1211	83.8658	82.205	76.5406	72.1432	137.548
118515507	5.8S ribosomal RNA	102.195	109.307	68.2608	96.2558	77.4369	74.2019	112.438	74.8359	90.9597	102.409	92.4747	83.8817	87.8489	100.189	89.2699	90.1211	83.8658	82.205	76.5406	72.1432	137.548
118515508	5.8S ribosomal RNA	102.195	109.307	68.2608	96.2558	77.4369	74.2019	112.438	74.8359	90.9597	102.409	92.4747	83.8817	87.8489	100.189	89.2699	90.1211	83.8658	82.205	76.5406	72.1432	137.548
118515509	5.8S ribosomal RNA	102.195	109.307	68.2608	96.2558	77.4369	74.2019	112.438	74.8359	90.9597	102.409	92.4747	83.8817	87.8489	100.189	89.2699	90.1211	83.8658	82.205	76.5406	72.1432	137.548
118515510	5.8S ribosomal RNA	102.195	109.307	68.2608	96.2558	77.4369	74.2019	112.438	74.8359	90.9597	102.409	92.4747	83.8817	87.8489	100.189	89.2699	90.1211	83.8658	82.205	76.5406	72.1432	137.548
118515511	5.8S ribosomal RNA	102.195	109.307	68.2608	96.2558	77.4369	74.2019	112.438	74.8359	90.9597	102.409	92.4747	83.8817	87.8489	100.189	89.2699	90.1211	83.8658	82.205	76.5406	72.1432	137.548
118515517	5.8S ribosomal RNA	102.195	109.307	68.2608	96.2558	77.4369	74.2019	112.438	74.8359	90.9597	102.409	92.4747	83.8817	87.8489	100.189	89.2699	90.1211	83.8658	82.205	76.5406	72.1432	137.548
118515522	5.8S ribosomal RNA	102.195	109.307	68.2608	96.2558	77.4369	74.2019	112.438	74.8359	90.9597	102.409	92.4747	83.8817	87.8489	100.189	89.2699	90.1211	83.8658	82.205	76.5406	72.1432	137.548
118515523	5.8S ribosomal RNA	102.195	109.307	68.2608	96.2558	77.4369	74.2019	112.438	74.8359	90.9597	102.409	92.4747	83.8817	87.8489	100.189	89.2699	90.1211	83.8658	82.205	76.5406	72.1432	137.548
118515524	5.8S ribosomal RNA	102.195	109.307	68.2608	96.2558	77.4369	74.2019	112.438	74.8359	90.9597	102.409	92.4747	83.8817	87.8489	100.189	89.2699	90.1211	83.8658	82.205	76.5406	72.1432	137.548
118515528	5.8S ribosomal RNA	102.195	109.307	68.2608	96.2558	77.4369	74.2019	112.438	74.8359	90.9597	102.409	92.4747	83.8817	87.8489	100.189	89.2699	90.1211	83.8658	82.205	76.5406	72.1432	137.548
118515529	5.8S ribosomal RNA	102.195	109.307	68.2608	96.2558	77.4369	74.2019	112.438	74.8359	90.9597	102.409	92.4747	83.8817	87.8489	100.189	89.2699	90.1211	83.8658	82.205	76.5406	72.1432	137.548
118515530	5.8S ribosomal RNA	102.195	109.307	68.2608	96.2558	77.4369	74.2019	112.438	74.8359	90.9597	102.409	92.4747	83.8817	87.8489	100.189	89.2699	90.1211	83.8658	82.205	76.5406	72.1432	137.548
118515534	5.8S ribosomal RNA	102.195	109.307	68.2608	96.2558	77.4369	74.2019	112.438	74.8359	90.9597	102.409	92.4747	83.8817	87.8489	100.189	89.2699	90.1211	83.8658	82.205	76.5406	72.1432	137.548
118515535	5.8S ribosomal RNA	102.195	109.307	68.2608	96.2558	77.4369	74.2019	112.438	74.8359	90.9597	102.409	92.4747	83.8817	87.8489	100.189	89.2699	90.1211	83.8658	82.205	76.5406	72.1432	137.548
118515537	5.8S ribosomal RNA	102.195	109.307	68.2608	96.2558	77.4369	74.2019	112.438	74.8359	90.9597	102.409	92.4747	83.8817	87.8489	100.189	89.2699	90.1211	83.8658	82.205	76.5406	72.1432	137.548
118515541	5.8S ribosomal RNA	102.195	109.307	68.2608	96.2558	77.4369	74.2019	112.438	74.8359	90.9597	102.409	92.4747	83.8817	87.8489	100.189	89.2699	90.1211	83.8658	82.205	76.5406	72.1432	137.548
118515542	5.8S ribosomal RNA	102.195	109.307	68.2608	96.2558	77.4369	74.2019	112.438	74.8359	90.9597	102.409	92.4747	83.8817	87.8489	100.189	89.2699	90.1211	83.8658	82.205	76.5406	72.1432	137.548
118515543	5.8S ribosomal RNA	102.195	109.307	68.2608	96.2558	77.4369	74.2019	112.438	74.8359	90.9597	102.409	92.4747	83.8817	87.8489	100.189	89.2699	90.1211	83.8658	82.205	76.5406	72.1432	137.548
118515544	5.8S ribosomal RNA	102.195	109.307	68.2608	96.2558	77.4369	74.2019	112.438	74.8359	90.9597	102.409	92.4747	83.8817	87.8489	100.189	89.2699	90.1211	83.8658	82.205	76.5406	72.1432	137.548
118515549	5.8S ribosomal RNA	102.195	109.307	68.2608	96.2558	77.4369	74.2019	112.438	74.8359	90.9597	102.409	92.4747	83.8817	87.8489	100.189	89.2699	90.1211	83.8658	82.205	76.5406	72.1432	137.548
118515550	5.8S ribosomal RNA	102.195	109.307	68.2608	96.2558	77.4369	74.2019	112.438	74.8359	90.9597	102.409	92.4747	83.8817	87.8489	100.189	89.2699	90.1211	83.8658	82.205	76.5406	72.1432	137.548
118515551	5.8S ribosomal RNA	102.195	109.307	68.2608	96.2558	77.4369	74.2019	112.438	74.8359	90.9597	102.409	92.4747	83.8817	87.8489	100.189	89.2699	90.1211	83.8658	82.205	76.5406	72.1432	137.548
118515552	5.8S ribosomal RNA	102.195	109.307	68.2608	96.2558	77.4369	74.2019	112.438	74.8359	90.9597	102.409	92.4747	83.8817	87.8489	100.189	89.2699	90.1211	83.8658	82.205	76.5406	72.1432	137.548
118515555	5.8S ribosomal RNA	102.195	109.307	68.2608	96.2558	77.4369	74.2019	112.438	74.8359	90.9597	102.409	92.4747	83.8817	87.8489	100.189	89.2699	90.1211	83.8658	82.205	76.5406	72.1432	137.548
118515556	5.8S ribosomal RNA	102.195	109.307	68.2608	96.2558	77.4369	74.2019	112.438	74.8359	90.9597	102.409	92.4747	83.8817	87.8489	100.189	89.2699	90.1211	83.8658	82.205	76.5406	72.1432	137.548
118515557	5.8S ribosomal RNA	102.195	109.307	68.2608	96.2558	77.4369	74.2019	112.438	74.8359	90.9597	102.409	92.4747	83.8817	87.8489	100.189	89.2699	90.1211	83.8658	82.205	76.5406	72.1432	137.548
118515560	5.8S ribosomal RNA	102.195	109.307	68.2608	96.2558	77.4369	74.2019	112.438	74.8359	90.9597	102.409	92.4747	83.8817	87.8489	100.189	89.2699	90.1211	83.8658	82.205	76.5406	72.1432	137.548
118515561	5.8S ribosomal RNA	102.195	109.307	68.2608	96.2558	77.4369	74.2019	112.438	74.8359	90.9597	102.409	92.4747	83.8817	87.8489	100.189	89.2699	90.1211	83.8658	82.205	76.5406	72.1432	137.548
118515565	5.8S ribosomal RNA	102.195	109.307	68.2608	96.2558	77.4369	74.2019	112.438	74.8359	90.9597	102.409	92.4747	83.8817	87.8489	100.189	89.2699	90.1211	83.8658	82.205	76.5406	72.1432	137.548
118515566	5.8S ribosomal RNA	102.195	109.307	68.2608	96.2558	77.4369	74.2019	112.438	74.8359	90.9597	102.409	92.4747	83.8817	87.8489	100.189	89.2699	90.1211	83.8658	82.205	76.5406	72.1432	137.548
118515567	5.8S ribosomal RNA	102.195	109.307	68.2608	96.2558	77.4369	74.2019	112.438	74.8359	90.9597	102.409	92.4747	83.8817	87.8489	100.189	89.2699	90.1211	83.8658	82.205	76.5406	72.1432	137.548
118515569	5.8S ribosomal RNA	2.42412	11.5769	2.84826	7.90954	2.32866	0	10.6231	6.24905	5.21217	0	2.57488	5.90626	4.83178	2.24412	0	1.96085	7.39975	4.8762	5.07932	4.40301	30.3654
118515570	5.8S ribosomal RNA	102.195	109.307	68.2608	96.2558	77.4369	74.2019	112.438	74.8359	90.9597	102.409	92.4747	83.8817	87.8489	100.189	89.2699	90.1211	83.8658	82.205	76.5406	72.1432	137.548
118515578	5.8S ribosomal RNA	102.195	109.307	68.2608	96.2558	77.4369	74.2019	112.438	74.8359	90.9597	102.409	92.4747	83.8817	87.8489	100.189	89.2699	90.1211	83.8658	82.205	76.5406	72.1432	137.548
118515580	5.8S ribosomal RNA	102.195	109.307	68.2608	96.2558	77.4369	74.2019	112.438	74.8359	90.9597	102.409	92.4747	83.8817	87.8489	100.189	89.2699	90.1211	83.8658	82.205	76.5406	72.1432	137.548
118515581	5.8S ribosomal RNA	102.195	109.307	68.2608	96.2558	77.4369	74.2019	112.438	74.8359	90.9597	102.409	92.4747	83.8817	87.8489	100.189	89.2699	90.1211	83.8658	82.205	76.5406	72.1432	137.548
118515582	5.8S ribosomal RNA	102.195	109.307	68.2608	96.2558	77.4369	74.2019	112.438	74.8359	90.9597	102.409	92.4747	83.8817	87.8489	100.189	89.2699	90.1211	83.8658	82.205	76.5406	72.1432	137.548
118515586	5.8S ribosomal RNA	102.195	109.307	68.2608	96.2558	77.4369	74.2019	112.438	74.8359	90.9597	102.409	92.4747	83.8817	87.8489	100.189	89.2699	90.1211	83.8658	82.205	76.5406	72.1432	137.548
118515587	5.8S ribosomal RNA	102.195	109.307	68.2608	96.2558	77.4369	74.2019	112.438	74.8359	90.9597	102.409	92.4747	83.8817	87.8489	100.189	89.2699	90.1211	83.8658	82.205	76.5406	72.1432	137.548
118515588	5.8S ribosomal RNA	102.195	109.307	68.2608	96.2558	77.4369	74.2019	112.438	74.8359	90.9597	102.409	92.4747	83.8817	87.8489	100.189	89.2699	90.1211	83.8658	82.205	76.5406	72.1432	137.548
118515589	5.8S ribosomal RNA	102.195	109.307	68.2608	96.2558	77.4369	74.2019	112.438	74.8359	90.9597	102.409	92.4747	83.8817	87.8489	100.189	89.2699	90.1211	83.8658	82.205	76.5406	72.1432	137.548
118515590	5.8S ribosomal RNA	102.195	109.307	68.2608	96.2558	77.4369	74.2019	112.438	74.8359	90.9597	102.409	92.4747	83.8817	87.8489	100.189	89.2699	90.1211	83.8658	82.205	76.5406	72.1432	137.548
118515591	5.8S ribosomal RNA	102.195	109.307	68.2608	96.2558	77.4369	74.2019	112.438	74.8359	90.9597	102.409	92.4747	83.8817	87.8489	100.189	89.2699	90.1211	83.8658	82.205	76.5406	72.1432	137.548
118515592	5.8S ribosomal RNA	102.195	109.307	68.2608	96.2558	77.4369	74.2019	112.438	74.8359	90.9597	102.409	92.4747	83.8817	87.8489	100.189	89.2699	90.1211	83.8658	82.205	76.5406	72.1432	137.548
118515602	5.8S ribosomal RNA	102.195	109.307	68.2608	96.2558	77.4369	74.2019	112.438	74.8359	90.9597	102.409	92.4747	83.8817	87.8489	100.189	89.2699	90.1211	83.8658	82.205	76.5406	72.1432	137.548
118515603	5.8S ribosomal RNA	102.195	109.307	68.2608	96.2558	77.4369	74.2019	112.438	74.8359	90.9597	102.409	92.4747	83.8817	87.8489	100.189	89.2699	90.1211	83.8658	82.205	76.5406	72.1432	137.548
118515604	5.8S ribosomal RNA	102.195	109.307	68.2608	96.2558	77.4369	74.2019	112.438	74.8359	90.9597	102.409	92.4747	83.8817	87.8489	100.189	89.2699	90.1211	83.8658	82.205	76.5406	72.1432	137.548
118515605	5.8S ribosomal RNA	102.195	109.307	68.2608	96.2558	77.4369	74.2019	112.438	74.8359	90.9597	102.409	92.4747	83.8817	87.8489	100.189	89.2699	90.1211	83.8658	82.205	76.5406	72.1432	137.548
118515609	5.8S ribosomal RNA	102.195	109.307	68.2608	96.2558	77.4369	74.2019	112.438	74.8359	90.9597	102.409	92.4747	83.8817	87.8489	100.189	89.2699	90.1211	83.8658	82.205	76.5406	72.1432	137.548
118515610	5.8S ribosomal RNA	2.42412	11.5769	2.84826	7.90954	2.32866	0	10.6231	6.24905	5.21217	0	2.57488	5.90626	4.83178	2.24412	0	1.96085	7.39975	4.8762	5.07932	4.40301	30.3654
118515612	5.8S ribosomal RNA	102.195	109.307	68.2608	96.2558	77.4369	74.2019	112.438	74.8359	90.9597	102.409	92.4747	83.8817	87.8489	100.189	89.2699	90.1211	83.8658	82.205	76.5406	72.1432	137.548
118515614	5.8S ribosomal RNA	102.195	109.307	68.2608	96.2558	77.4369	74.2019	112.438	74.8359	90.9597	102.409	92.4747	83.8817	87.8489	100.189	89.2699	90.1211	83.8658	82.205	76.5406	72.1432	137.548
118515616	5.8S ribosomal RNA	102.195	109.307	68.2608	96.2558	77.4369	74.2019	112.438	74.8359	90.9597	102.409	92.4747	83.8817	87.8489	100.189	89.2699	90.1211	83.8658	82.205	76.5406	72.1432	137.548
118515621	5.8S ribosomal RNA	102.195	109.307	68.2608	96.2558	77.4369	74.2019	112.438	74.8359	90.9597	102.409	92.4747	83.8817	87.8489	100.189	89.2699	90.1211	83.8658	82.205	76.5406	72.1432	137.548
118515622	5.8S ribosomal RNA	102.195	109.307	68.2608	96.2558	77.4369	74.2019	112.438	74.8359	90.9597	102.409	92.4747	83.8817	87.8489	100.189	89.2699	90.1211	83.8658	82.205	76.5406	72.1432	137.548
118515623	5.8S ribosomal RNA	102.195	109.307	68.2608	96.2558	77.4369	74.2019	112.438	74.8359	90.9597	102.409	92.4747	83.8817	87.8489	100.189	89.2699	90.1211	83.8658	82.205	76.5406	72.1432	137.548
118515626	5.8S ribosomal RNA	102.195	109.307	68.2608	96.2558	77.4369	74.2019	112.438	74.8359	90.9597	102.409	92.4747	83.8817	87.8489	100.189	89.2699	90.1211	83.8658	82.205	76.5406	72.1432	137.548
118515627	5.8S ribosomal RNA	102.195	109.307	68.2608	96.2558	77.4369	74.2019	112.438	74.8359	90.9597	102.409	92.4747	83.8817	87.8489	100.189	89.2699	90.1211	83.8658	82.205	76.5406	72.1432	137.548
118515628	5.8S ribosomal RNA	102.195	109.307	68.2608	96.2558	77.4369	74.2019	112.438	74.8359	90.9597	102.409	92.4747	83.8817	87.8489	100.189	89.2699	90.1211	83.8658	82.205	76.5406	72.1432	137.548
118515629	5.8S ribosomal RNA	102.195	109.307	68.2608	96.2558	77.4369	74.2019	112.438	74.8359	90.9597	102.409	92.4747	83.8817	87.8489	100.189	89.2699	90.1211	83.8658	82.205	76.5406	72.1432	137.548
118515630	5.8S ribosomal RNA	102.195	109.307	68.2608	96.2558	77.4369	74.2019	112.438	74.8359	90.9597	102.409	92.4747	83.8817	87.8489	100.189	89.2699	90.1211	83.8658	82.205	76.5406	72.1432	137.548
118515631	5.8S ribosomal RNA	102.195	109.307	68.2608	96.2558	77.4369	74.2019	112.438	74.8359	90.9597	102.409	92.4747	83.8817	87.8489	100.189	89.2699	90.1211	83.8658	82.205	76.5406	72.1432	137.548
118515632	5.8S ribosomal RNA	102.195	109.307	68.2608	96.2558	77.4369	74.2019	112.438	74.8359	90.9597	102.409	92.4747	83.8817	87.8489	100.189	89.2699	90.1211	83.8658	82.205	76.5406	72.1432	137.548
118515633	5.8S ribosomal RNA	102.195	109.307	68.2608	96.2558	77.4369	74.2019	112.438	74.8359	90.9597	102.409	92.4747	83.8817	87.8489	100.189	89.2699	90.1211	83.8658	82.205	76.5406	72.1432	137.548
118515634	5.8S ribosomal RNA	102.195	109.307	68.2608	96.2558	77.4369	74.2019	112.438	74.8359	90.9597	102.409	92.4747	83.8817	87.8489	100.189	89.2699	90.1211	83.8658	82.205	76.5406	72.1432	137.548
118515635	5.8S ribosomal RNA	102.195	109.307	68.2608	96.2558	77.4369	74.2019	112.438	74.8359	90.9597	102.409	92.4747	83.8817	87.8489	100.189	89.2699	90.1211	83.8658	82.205	76.5406	72.1432	137.548
118515644	5.8S ribosomal RNA	102.195	109.307	68.2608	96.2558	77.4369	74.2019	112.438	74.8359	90.9597	102.409	92.4747	83.8817	87.8489	100.189	89.2699	90.1211	83.8658	82.205	76.5406	72.1432	137.548
118515650	5.8S ribosomal RNA	102.195	109.307	68.2608	96.2558	77.4369	74.2019	112.438	74.8359	90.9597	102.409	92.4747	83.8817	87.8489	100.189	89.2699	90.1211	83.8658	82.205	76.5406	72.1432	137.548
118515651	5.8S ribosomal RNA	102.195	109.307	68.2608	96.2558	77.4369	74.2019	112.438	74.8359	90.9597	102.409	92.4747	83.8817	87.8489	100.189	89.2699	90.1211	83.8658	82.205	76.5406	72.1432	137.548
118515653	5.8S ribosomal RNA	102.195	109.307	68.2608	96.2558	77.4369	74.2019	112.438	74.8359	90.9597	102.409	92.4747	83.8817	87.8489	100.189	89.2699	90.1211	83.8658	82.205	76.5406	72.1432	137.548
118515656	5.8S ribosomal RNA	102.195	109.307	68.2608	96.2558	77.4369	74.2019	112.438	74.8359	90.9597	102.409	92.4747	83.8817	87.8489	100.189	89.2699	90.1211	83.8658	82.205	76.5406	72.1432	137.548
118515659	5.8S ribosomal RNA	102.195	109.307	68.2608	96.2558	77.4369	74.2019	112.438	74.8359	90.9597	102.409	92.4747	83.8817	87.8489	100.189	89.2699	90.1211	83.8658	82.205	76.5406	72.1432	137.548
118515662	5.8S ribosomal RNA	102.195	109.307	68.2608	96.2558	77.4369	74.2019	112.438	74.8359	90.9597	102.409	92.4747	83.8817	87.8489	100.189	89.2699	90.1211	83.8658	82.205	76.5406	72.1432	137.548
118515664	5.8S ribosomal RNA	102.195	109.307	68.2608	96.2558	77.4369	74.2019	112.438	74.8359	90.9597	102.409	92.4747	83.8817	87.8489	100.189	89.2699	90.1211	83.8658	82.205	76.5406	72.1432	137.548
118515667	5.8S ribosomal RNA	102.195	109.307	68.2608	96.2558	77.4369	74.2019	112.438	74.8359	90.9597	102.409	92.4747	83.8817	87.8489	100.189	89.2699	90.1211	83.8658	82.205	76.5406	72.1432	137.548
118515668	5.8S ribosomal RNA	102.195	109.307	68.2608	96.2558	77.4369	74.2019	112.438	74.8359	90.9597	102.409	92.4747	83.8817	87.8489	100.189	89.2699	90.1211	83.8658	82.205	76.5406	72.1432	137.548
118515671	5.8S ribosomal RNA	102.195	109.307	68.2608	96.2558	77.4369	74.2019	112.438	74.8359	90.9597	102.409	92.4747	83.8817	87.8489	100.189	89.2699	90.1211	83.8658	82.205	76.5406	72.1432	137.548
118515675	5.8S ribosomal RNA	102.195	109.307	68.2608	96.2558	77.4369	74.2019	112.438	74.8359	90.9597	102.409	92.4747	83.8817	87.8489	100.189	89.2699	90.1211	83.8658	82.205	76.5406	72.1432	137.548
118515676	5.8S ribosomal RNA	102.195	109.307	68.2608	96.2558	77.4369	74.2019	112.438	74.8359	90.9597	102.409	92.4747	83.8817	87.8489	100.189	89.2699	90.1211	83.8658	82.205	76.5406	72.1432	137.548
118515678	5.8S ribosomal RNA	102.195	109.307	68.2608	96.2558	77.4369	74.2019	112.438	74.8359	90.9597	102.409	92.4747	83.8817	87.8489	100.189	89.2699	90.1211	83.8658	82.205	76.5406	72.1432	137.548
118515681	5.8S ribosomal RNA	6.59313	0	11.9897	14.1122	3.16635	0	11.1708	0	7.45421	11.3762	3.69219	4.20655	13.0271	15.8131	17.4227	15.8258	18.6882	14.1035	12.0244	17.2305	27.4373
118515682	5.8S ribosomal RNA	102.195	109.307	68.2608	96.2558	77.4369	74.2019	112.438	74.8359	90.9597	102.409	92.4747	83.8817	87.8489	100.189	89.2699	90.1211	83.8658	82.205	76.5406	72.1432	137.548
118515688	5.8S ribosomal RNA	102.195	109.307	68.2608	96.2558	77.4369	74.2019	112.438	74.8359	90.9597	102.409	92.4747	83.8817	87.8489	100.189	89.2699	90.1211	83.8658	82.205	76.5406	72.1432	137.548
118515689	5.8S ribosomal RNA	102.195	109.307	68.2608	96.2558	77.4369	74.2019	112.438	74.8359	90.9597	102.409	92.4747	83.8817	87.8489	100.189	89.2699	90.1211	83.8658	82.205	76.5406	72.1432	137.548
118515690	5.8S ribosomal RNA	102.195	109.307	68.2608	96.2558	77.4369	74.2019	112.438	74.8359	90.9597	102.409	92.4747	83.8817	87.8489	100.189	89.2699	90.1211	83.8658	82.205	76.5406	72.1432	137.548
118515691	5.8S ribosomal RNA	102.195	109.307	68.2608	96.2558	77.4369	74.2019	112.438	74.8359	90.9597	102.409	92.4747	83.8817	87.8489	100.189	89.2699	90.1211	83.8658	82.205	76.5406	72.1432	137.548
118515692	5.8S ribosomal RNA	102.195	109.307	68.2608	96.2558	77.4369	74.2019	112.438	74.8359	90.9597	102.409	92.4747	83.8817	87.8489	100.189	89.2699	90.1211	83.8658	82.205	76.5406	72.1432	137.548
118515697	5.8S ribosomal RNA	102.195	109.307	68.2608	96.2558	77.4369	74.2019	112.438	74.8359	90.9597	102.409	92.4747	83.8817	87.8489	100.189	89.2699	90.1211	83.8658	82.205	76.5406	72.1432	137.548
118515698	5.8S ribosomal RNA	102.195	109.307	68.2608	96.2558	77.4369	74.2019	112.438	74.8359	90.9597	102.409	92.4747	83.8817	87.8489	100.189	89.2699	90.1211	83.8658	82.205	76.5406	72.1432	137.548
118515701	5.8S ribosomal RNA	102.195	109.307	68.2608	96.2558	77.4369	74.2019	112.438	74.8359	90.9597	102.409	92.4747	83.8817	87.8489	100.189	89.2699	90.1211	83.8658	82.205	76.5406	72.1432	137.548
118515702	5.8S ribosomal RNA	102.195	109.307	68.2608	96.2558	77.4369	74.2019	112.438	74.8359	90.9597	102.409	92.4747	83.8817	87.8489	100.189	89.2699	90.1211	83.8658	82.205	76.5406	72.1432	137.548
118515703	5.8S ribosomal RNA	102.195	109.307	68.2608	96.2558	77.4369	74.2019	112.438	74.8359	90.9597	102.409	92.4747	83.8817	87.8489	100.189	89.2699	90.1211	83.8658	82.205	76.5406	72.1432	137.548
118515704	5.8S ribosomal RNA	102.195	109.307	68.2608	96.2558	77.4369	74.2019	112.438	74.8359	90.9597	102.409	92.4747	83.8817	87.8489	100.189	89.2699	90.1211	83.8658	82.205	76.5406	72.1432	137.548
118515706	5.8S ribosomal RNA	102.195	109.307	68.2608	96.2558	77.4369	74.2019	112.438	74.8359	90.9597	102.409	92.4747	83.8817	87.8489	100.189	89.2699	90.1211	83.8658	82.205	76.5406	72.1432	137.548
118515708	5.8S ribosomal RNA	102.195	109.307	68.2608	96.2558	77.4369	74.2019	112.438	74.8359	90.9597	102.409	92.4747	83.8817	87.8489	100.189	89.2699	90.1211	83.8658	82.205	76.5406	72.1432	137.548
118515716	5.8S ribosomal RNA	102.195	109.307	68.2608	96.2558	77.4369	74.2019	112.438	74.8359	90.9597	102.409	92.4747	83.8817	87.8489	100.189	89.2699	90.1211	83.8658	82.205	76.5406	72.1432	137.548
118515717	5.8S ribosomal RNA	102.195	109.307	68.2608	96.2558	77.4369	74.2019	112.438	74.8359	90.9597	102.409	92.4747	83.8817	87.8489	100.189	89.2699	90.1211	83.8658	82.205	76.5406	72.1432	137.548
118515718	5.8S ribosomal RNA	102.195	109.307	68.2608	96.2558	77.4369	74.2019	112.438	74.8359	90.9597	102.409	92.4747	83.8817	87.8489	100.189	89.2699	90.1211	83.8658	82.205	76.5406	72.1432	137.548
118515723	5.8S ribosomal RNA	22.959	32.4553	35.1932	30.117	15.3292	22.109	18.1418	28.7475	39.3552	36.9279	24.9063	24.3885	76.1194	18.4223	23.8126	29.7212	37.2915	20.9581	14.0492	18.8763	41.3535
118515726	5.8S ribosomal RNA	102.195	109.307	68.2608	96.2558	77.4369	74.2019	112.438	74.8359	90.9597	102.409	92.4747	83.8817	87.8489	100.189	89.2699	90.1211	83.8658	82.205	76.5406	72.1432	137.548
118515727	5.8S ribosomal RNA	102.195	109.307	68.2608	96.2558	77.4369	74.2019	112.438	74.8359	90.9597	102.409	92.4747	83.8817	87.8489	100.189	89.2699	90.1211	83.8658	82.205	76.5406	72.1432	137.548
118515730	5.8S ribosomal RNA	102.195	109.307	68.2608	96.2558	77.4369	74.2019	112.438	74.8359	90.9597	102.409	92.4747	83.8817	87.8489	100.189	89.2699	90.1211	83.8658	82.205	76.5406	72.1432	137.548
118515734	5.8S ribosomal RNA	102.195	109.307	68.2608	96.2558	77.4369	74.2019	112.438	74.8359	90.9597	102.409	92.4747	83.8817	87.8489	100.189	89.2699	90.1211	83.8658	82.205	76.5406	72.1432	137.548
118515735	5.8S ribosomal RNA	102.195	109.307	68.2608	96.2558	77.4369	74.2019	112.438	74.8359	90.9597	102.409	92.4747	83.8817	87.8489	100.189	89.2699	90.1211	83.8658	82.205	76.5406	72.1432	137.548
118515736	5.8S ribosomal RNA	102.195	109.307	68.2608	96.2558	77.4369	74.2019	112.438	74.8359	90.9597	102.409	92.4747	83.8817	87.8489	100.189	89.2699	90.1211	83.8658	82.205	76.5406	72.1432	137.548
118515738	5.8S ribosomal RNA	102.195	109.307	68.2608	96.2558	77.4369	74.2019	112.438	74.8359	90.9597	102.409	92.4747	83.8817	87.8489	100.189	89.2699	90.1211	83.8658	82.205	76.5406	72.1432	137.548
118515741	5.8S ribosomal RNA	102.195	109.307	68.2608	96.2558	77.4369	74.2019	112.438	74.8359	90.9597	102.409	92.4747	83.8817	87.8489	100.189	89.2699	90.1211	83.8658	82.205	76.5406	72.1432	137.548
118515742	5.8S ribosomal RNA	102.195	109.307	68.2608	96.2558	77.4369	74.2019	112.438	74.8359	90.9597	102.409	92.4747	83.8817	87.8489	100.189	89.2699	90.1211	83.8658	82.205	76.5406	72.1432	137.548
118515744	5.8S ribosomal RNA	102.195	109.307	68.2608	96.2558	77.4369	74.2019	112.438	74.8359	90.9597	102.409	92.4747	83.8817	87.8489	100.189	89.2699	90.1211	83.8658	82.205	76.5406	72.1432	137.548
118515746	5.8S ribosomal RNA	102.195	109.307	68.2608	96.2558	77.4369	74.2019	112.438	74.8359	90.9597	102.409	92.4747	83.8817	87.8489	100.189	89.2699	90.1211	83.8658	82.205	76.5406	72.1432	137.548
118515751	5.8S ribosomal RNA	102.195	109.307	68.2608	96.2558	77.4369	74.2019	112.438	74.8359	90.9597	102.409	92.4747	83.8817	87.8489	100.189	89.2699	90.1211	83.8658	82.205	76.5406	72.1432	137.548
118515752	5.8S ribosomal RNA	102.195	109.307	68.2608	96.2558	77.4369	74.2019	112.438	74.8359	90.9597	102.409	92.4747	83.8817	87.8489	100.189	89.2699	90.1211	83.8658	82.205	76.5406	72.1432	137.548
118515753	5.8S ribosomal RNA	102.195	109.307	68.2608	96.2558	77.4369	74.2019	112.438	74.8359	90.9597	102.409	92.4747	83.8817	87.8489	100.189	89.2699	90.1211	83.8658	82.205	76.5406	72.1432	137.548
118515755	5.8S ribosomal RNA	102.195	109.307	68.2608	96.2558	77.4369	74.2019	112.438	74.8359	90.9597	102.409	92.4747	83.8817	87.8489	100.189	89.2699	90.1211	83.8658	82.205	76.5406	72.1432	137.548
118515756	5.8S ribosomal RNA	102.195	109.307	68.2608	96.2558	77.4369	74.2019	112.438	74.8359	90.9597	102.409	92.4747	83.8817	87.8489	100.189	89.2699	90.1211	83.8658	82.205	76.5406	72.1432	137.548
118515757	5.8S ribosomal RNA	102.195	109.307	68.2608	96.2558	77.4369	74.2019	112.438	74.8359	90.9597	102.409	92.4747	83.8817	87.8489	100.189	89.2699	90.1211	83.8658	82.205	76.5406	72.1432	137.548
118515759	5.8S ribosomal RNA	102.195	109.307	68.2608	96.2558	77.4369	74.2019	112.438	74.8359	90.9597	102.409	92.4747	83.8817	87.8489	100.189	89.2699	90.1211	83.8658	82.205	76.5406	72.1432	137.548
118515760	5.8S ribosomal RNA	102.195	109.307	68.2608	96.2558	77.4369	74.2019	112.438	74.8359	90.9597	102.409	92.4747	83.8817	87.8489	100.189	89.2699	90.1211	83.8658	82.205	76.5406	72.1432	137.548
118515761	5.8S ribosomal RNA	102.195	109.307	68.2608	96.2558	77.4369	74.2019	112.438	74.8359	90.9597	102.409	92.4747	83.8817	87.8489	100.189	89.2699	90.1211	83.8658	82.205	76.5406	72.1432	137.548
118515762	5.8S ribosomal RNA	102.195	109.307	68.2608	96.2558	77.4369	74.2019	112.438	74.8359	90.9597	102.409	92.4747	83.8817	87.8489	100.189	89.2699	90.1211	83.8658	82.205	76.5406	72.1432	137.548
118515763	5.8S ribosomal RNA	10.5059	9.83943	6.07757	0	4.50121	9.66482	10.9493	0	0	0	0	5.88665	4.61913	4.49348	19.7845	11.3861	16.0665	12.5646	13.8561	15.5803	8.13074
118515765	5.8S ribosomal RNA	102.195	109.307	68.2608	96.2558	77.4369	74.2019	112.438	74.8359	90.9597	102.409	92.4747	83.8817	87.8489	100.189	89.2699	90.1211	83.8658	82.205	76.5406	72.1432	137.548
118515766	5.8S ribosomal RNA	102.195	109.307	68.2608	96.2558	77.4369	74.2019	112.438	74.8359	90.9597	102.409	92.4747	83.8817	87.8489	100.189	89.2699	90.1211	83.8658	82.205	76.5406	72.1432	137.548
118515769	5.8S ribosomal RNA	102.195	109.307	68.2608	96.2558	77.4369	74.2019	112.438	74.8359	90.9597	102.409	92.4747	83.8817	87.8489	100.189	89.2699	90.1211	83.8658	82.205	76.5406	72.1432	137.548
118515779	5.8S ribosomal RNA	102.195	109.307	68.2608	96.2558	77.4369	74.2019	112.438	74.8359	90.9597	102.409	92.4747	83.8817	87.8489	100.189	89.2699	90.1211	83.8658	82.205	76.5406	72.1432	137.548
118515780	5.8S ribosomal RNA	102.195	109.307	68.2608	96.2558	77.4369	74.2019	112.438	74.8359	90.9597	102.409	92.4747	83.8817	87.8489	100.189	89.2699	90.1211	83.8658	82.205	76.5406	72.1432	137.548
118515784	5.8S ribosomal RNA	102.195	109.307	68.2608	96.2558	77.4369	74.2019	112.438	74.8359	90.9597	102.409	92.4747	83.8817	87.8489	100.189	89.2699	90.1211	83.8658	82.205	76.5406	72.1432	137.548
118515785	5.8S ribosomal RNA	102.195	109.307	68.2608	96.2558	77.4369	74.2019	112.438	74.8359	90.9597	102.409	92.4747	83.8817	87.8489	100.189	89.2699	90.1211	83.8658	82.205	76.5406	72.1432	137.548
118515786	5.8S ribosomal RNA	102.195	109.307	68.2608	96.2558	77.4369	74.2019	112.438	74.8359	90.9597	102.409	92.4747	83.8817	87.8489	100.189	89.2699	90.1211	83.8658	82.205	76.5406	72.1432	137.548
118515789	5.8S ribosomal RNA	102.195	109.307	68.2608	96.2558	77.4369	74.2019	112.438	74.8359	90.9597	102.409	92.4747	83.8817	87.8489	100.189	89.2699	90.1211	83.8658	82.205	76.5406	72.1432	137.548
118515790	5.8S ribosomal RNA	102.195	109.307	68.2608	96.2558	77.4369	74.2019	112.438	74.8359	90.9597	102.409	92.4747	83.8817	87.8489	100.189	89.2699	90.1211	83.8658	82.205	76.5406	72.1432	137.548
118515794	5.8S ribosomal RNA	102.195	109.307	68.2608	96.2558	77.4369	74.2019	112.438	74.8359	90.9597	102.409	92.4747	83.8817	87.8489	100.189	89.2699	90.1211	83.8658	82.205	76.5406	72.1432	137.548
118515796	5.8S ribosomal RNA	102.195	109.307	68.2608	96.2558	77.4369	74.2019	112.438	74.8359	90.9597	102.409	92.4747	83.8817	87.8489	100.189	89.2699	90.1211	83.8658	82.205	76.5406	72.1432	137.548
118515797	5.8S ribosomal RNA	102.195	109.307	68.2608	96.2558	77.4369	74.2019	112.438	74.8359	90.9597	102.409	92.4747	83.8817	87.8489	100.189	89.2699	90.1211	83.8658	82.205	76.5406	72.1432	137.548
118515800	5.8S ribosomal RNA	102.195	109.307	68.2608	96.2558	77.4369	74.2019	112.438	74.8359	90.9597	102.409	92.4747	83.8817	87.8489	100.189	89.2699	90.1211	83.8658	82.205	76.5406	72.1432	137.548
118515805	5.8S ribosomal RNA	102.195	109.307	68.2608	96.2558	77.4369	74.2019	112.438	74.8359	90.9597	102.409	92.4747	83.8817	87.8489	100.189	89.2699	90.1211	83.8658	82.205	76.5406	72.1432	137.548
118515806	5.8S ribosomal RNA	102.195	109.307	68.2608	96.2558	77.4369	74.2019	112.438	74.8359	90.9597	102.409	92.4747	83.8817	87.8489	100.189	89.2699	90.1211	83.8658	82.205	76.5406	72.1432	137.548
118515807	5.8S ribosomal RNA	102.195	109.307	68.2608	96.2558	77.4369	74.2019	112.438	74.8359	90.9597	102.409	92.4747	83.8817	87.8489	100.189	89.2699	90.1211	83.8658	82.205	76.5406	72.1432	137.548
118515808	5.8S ribosomal RNA	102.195	109.307	68.2608	96.2558	77.4369	74.2019	112.438	74.8359	90.9597	102.409	92.4747	83.8817	87.8489	100.189	89.2699	90.1211	83.8658	82.205	76.5406	72.1432	137.548
118515811	5.8S ribosomal RNA	102.195	109.307	68.2608	96.2558	77.4369	74.2019	112.438	74.8359	90.9597	102.409	92.4747	83.8817	87.8489	100.189	89.2699	90.1211	83.8658	82.205	76.5406	72.1432	137.548
118515812	5.8S ribosomal RNA	102.195	109.307	68.2608	96.2558	77.4369	74.2019	112.438	74.8359	90.9597	102.409	92.4747	83.8817	87.8489	100.189	89.2699	90.1211	83.8658	82.205	76.5406	72.1432	137.548
118515813	5.8S ribosomal RNA	102.195	109.307	68.2608	96.2558	77.4369	74.2019	112.438	74.8359	90.9597	102.409	92.4747	83.8817	87.8489	100.189	89.2699	90.1211	83.8658	82.205	76.5406	72.1432	137.548
118515819	5.8S ribosomal RNA	102.195	109.307	68.2608	96.2558	77.4369	74.2019	112.438	74.8359	90.9597	102.409	92.4747	83.8817	87.8489	100.189	89.2699	90.1211	83.8658	82.205	76.5406	72.1432	137.548
118515820	5.8S ribosomal RNA	102.195	109.307	68.2608	96.2558	77.4369	74.2019	112.438	74.8359	90.9597	102.409	92.4747	83.8817	87.8489	100.189	89.2699	90.1211	83.8658	82.205	76.5406	72.1432	137.548
118515822	5.8S ribosomal RNA	102.195	109.307	68.2608	96.2558	77.4369	74.2019	112.438	74.8359	90.9597	102.409	92.4747	83.8817	87.8489	100.189	89.2699	90.1211	83.8658	82.205	76.5406	72.1432	137.548
118515823	5.8S ribosomal RNA	102.195	109.307	68.2608	96.2558	77.4369	74.2019	112.438	74.8359	90.9597	102.409	92.4747	83.8817	87.8489	100.189	89.2699	90.1211	83.8658	82.205	76.5406	72.1432	137.548
118515827	5.8S ribosomal RNA	102.195	109.307	68.2608	96.2558	77.4369	74.2019	112.438	74.8359	90.9597	102.409	92.4747	83.8817	87.8489	100.189	89.2699	90.1211	83.8658	82.205	76.5406	72.1432	137.548
118515832	5.8S ribosomal RNA	102.195	109.307	68.2608	96.2558	77.4369	74.2019	112.438	74.8359	90.9597	102.409	92.4747	83.8817	87.8489	100.189	89.2699	90.1211	83.8658	82.205	76.5406	72.1432	137.548
118515833	5.8S ribosomal RNA	102.195	109.307	68.2608	96.2558	77.4369	74.2019	112.438	74.8359	90.9597	102.409	92.4747	83.8817	87.8489	100.189	89.2699	90.1211	83.8658	82.205	76.5406	72.1432	137.548
118515834	5.8S ribosomal RNA	102.195	109.307	68.2608	96.2558	77.4369	74.2019	112.438	74.8359	90.9597	102.409	92.4747	83.8817	87.8489	100.189	89.2699	90.1211	83.8658	82.205	76.5406	72.1432	137.548
118515835	5.8S ribosomal RNA	102.195	109.307	68.2608	96.2558	77.4369	74.2019	112.438	74.8359	90.9597	102.409	92.4747	83.8817	87.8489	100.189	89.2699	90.1211	83.8658	82.205	76.5406	72.1432	137.548
118515836	5.8S ribosomal RNA	102.195	109.307	68.2608	96.2558	77.4369	74.2019	112.438	74.8359	90.9597	102.409	92.4747	83.8817	87.8489	100.189	89.2699	90.1211	83.8658	82.205	76.5406	72.1432	137.548
118515837	5.8S ribosomal RNA	102.195	109.307	68.2608	96.2558	77.4369	74.2019	112.438	74.8359	90.9597	102.409	92.4747	83.8817	87.8489	100.189	89.2699	90.1211	83.8658	82.205	76.5406	72.1432	137.548
118515838	5.8S ribosomal RNA	102.195	109.307	68.2608	96.2558	77.4369	74.2019	112.438	74.8359	90.9597	102.409	92.4747	83.8817	87.8489	100.189	89.2699	90.1211	83.8658	82.205	76.5406	72.1432	137.548
118515839	5.8S ribosomal RNA	102.195	109.307	68.2608	96.2558	77.4369	74.2019	112.438	74.8359	90.9597	102.409	92.4747	83.8817	87.8489	100.189	89.2699	90.1211	83.8658	82.205	76.5406	72.1432	137.548
118515840	5.8S ribosomal RNA	102.195	109.307	68.2608	96.2558	77.4369	74.2019	112.438	74.8359	90.9597	102.409	92.4747	83.8817	87.8489	100.189	89.2699	90.1211	83.8658	82.205	76.5406	72.1432	137.548
118515841	5.8S ribosomal RNA	102.195	109.307	68.2608	96.2558	77.4369	74.2019	112.438	74.8359	90.9597	102.409	92.4747	83.8817	87.8489	100.189	89.2699	90.1211	83.8658	82.205	76.5406	72.1432	137.548
118515851	5.8S ribosomal RNA	102.195	109.307	68.2608	96.2558	77.4369	74.2019	112.438	74.8359	90.9597	102.409	92.4747	83.8817	87.8489	100.189	89.2699	90.1211	83.8658	82.205	76.5406	72.1432	137.548
118515852	5.8S ribosomal RNA	102.195	109.307	68.2608	96.2558	77.4369	74.2019	112.438	74.8359	90.9597	102.409	92.4747	83.8817	87.8489	100.189	89.2699	90.1211	83.8658	82.205	76.5406	72.1432	137.548
118515853	5.8S ribosomal RNA	102.195	109.307	68.2608	96.2558	77.4369	74.2019	112.438	74.8359	90.9597	102.409	92.4747	83.8817	87.8489	100.189	89.2699	90.1211	83.8658	82.205	76.5406	72.1432	137.548
118515856	5.8S ribosomal RNA	102.195	109.307	68.2608	96.2558	77.4369	74.2019	112.438	74.8359	90.9597	102.409	92.4747	83.8817	87.8489	100.189	89.2699	90.1211	83.8658	82.205	76.5406	72.1432	137.548
118515860	5.8S ribosomal RNA	102.195	109.307	68.2608	96.2558	77.4369	74.2019	112.438	74.8359	90.9597	102.409	92.4747	83.8817	87.8489	100.189	89.2699	90.1211	83.8658	82.205	76.5406	72.1432	137.548
118515862	5.8S ribosomal RNA	102.195	109.307	68.2608	96.2558	77.4369	74.2019	112.438	74.8359	90.9597	102.409	92.4747	83.8817	87.8489	100.189	89.2699	90.1211	83.8658	82.205	76.5406	72.1432	137.548
118515866	5.8S ribosomal RNA	102.195	109.307	68.2608	96.2558	77.4369	74.2019	112.438	74.8359	90.9597	102.409	92.4747	83.8817	87.8489	100.189	89.2699	90.1211	83.8658	82.205	76.5406	72.1432	137.548
118515869	5.8S ribosomal RNA	102.195	109.307	68.2608	96.2558	77.4369	74.2019	112.438	74.8359	90.9597	102.409	92.4747	83.8817	87.8489	100.189	89.2699	90.1211	83.8658	82.205	76.5406	72.1432	137.548
118515870	5.8S ribosomal RNA	102.195	109.307	68.2608	96.2558	77.4369	74.2019	112.438	74.8359	90.9597	102.409	92.4747	83.8817	87.8489	100.189	89.2699	90.1211	83.8658	82.205	76.5406	72.1432	137.548
118515871	5.8S ribosomal RNA	102.195	109.307	68.2608	96.2558	77.4369	74.2019	112.438	74.8359	90.9597	102.409	92.4747	83.8817	87.8489	100.189	89.2699	90.1211	83.8658	82.205	76.5406	72.1432	137.548
118515872	5.8S ribosomal RNA	102.195	109.307	68.2608	96.2558	77.4369	74.2019	112.438	74.8359	90.9597	102.409	92.4747	83.8817	87.8489	100.189	89.2699	90.1211	83.8658	82.205	76.5406	72.1432	137.548
118515877	5.8S ribosomal RNA	102.195	109.307	68.2608	96.2558	77.4369	74.2019	112.438	74.8359	90.9597	102.409	92.4747	83.8817	87.8489	100.189	89.2699	90.1211	83.8658	82.205	76.5406	72.1432	137.548
118515878	5.8S ribosomal RNA	102.195	109.307	68.2608	96.2558	77.4369	74.2019	112.438	74.8359	90.9597	102.409	92.4747	83.8817	87.8489	100.189	89.2699	90.1211	83.8658	82.205	76.5406	72.1432	137.548
118515879	5.8S ribosomal RNA	29.0883	24.94	8.77581	11.7002	9.53015	3.55674	8.27361	7.50704	4.09448	12.6198	4.06192	23.2343	21.0436	10.4541	34.6586	20.7104	18.2384	19.2962	17.1599	3.92022	32.4987
118515882	5.8S ribosomal RNA	33.0798	30.6199	24.9027	29.4447	24.97	14.2523	16.3756	14.673	17.6221	6.65918	9.54844	25.614	22.7997	27.869	15.3038	36.5961	18.8907	19.0396	42.9236	30.1027	61.8162
118515888	5.8S ribosomal RNA	102.195	109.307	68.2608	96.2558	77.4369	74.2019	112.438	74.8359	90.9597	102.409	92.4747	83.8817	87.8489	100.189	89.2699	90.1211	83.8658	82.205	76.5406	72.1432	137.548
118515892	5.8S ribosomal RNA	102.195	109.307	68.2608	96.2558	77.4369	74.2019	112.438	74.8359	90.9597	102.409	92.4747	83.8817	87.8489	100.189	89.2699	90.1211	83.8658	82.205	76.5406	72.1432	137.548
118515893	5.8S ribosomal RNA	102.195	109.307	68.2608	96.2558	77.4369	74.2019	112.438	74.8359	90.9597	102.409	92.4747	83.8817	87.8489	100.189	89.2699	90.1211	83.8658	82.205	76.5406	72.1432	137.548
118515894	5.8S ribosomal RNA	102.195	109.307	68.2608	96.2558	77.4369	74.2019	112.438	74.8359	90.9597	102.409	92.4747	83.8817	87.8489	100.189	89.2699	90.1211	83.8658	82.205	76.5406	72.1432	137.548
118515897	5.8S ribosomal RNA	102.195	109.307	68.2608	96.2558	77.4369	74.2019	112.438	74.8359	90.9597	102.409	92.4747	83.8817	87.8489	100.189	89.2699	90.1211	83.8658	82.205	76.5406	72.1432	137.548
118515898	5.8S ribosomal RNA	102.195	109.307	68.2608	96.2558	77.4369	74.2019	112.438	74.8359	90.9597	102.409	92.4747	83.8817	87.8489	100.189	89.2699	90.1211	83.8658	82.205	76.5406	72.1432	137.548
118515903	5.8S ribosomal RNA	102.195	109.307	68.2608	96.2558	77.4369	74.2019	112.438	74.8359	90.9597	102.409	92.4747	83.8817	87.8489	100.189	89.2699	90.1211	83.8658	82.205	76.5406	72.1432	137.548
118515904	5.8S ribosomal RNA	102.195	109.307	68.2608	96.2558	77.4369	74.2019	112.438	74.8359	90.9597	102.409	92.4747	83.8817	87.8489	100.189	89.2699	90.1211	83.8658	82.205	76.5406	72.1432	137.548
118515905	5.8S ribosomal RNA	102.195	109.307	68.2608	96.2558	77.4369	74.2019	112.438	74.8359	90.9597	102.409	92.4747	83.8817	87.8489	100.189	89.2699	90.1211	83.8658	82.205	76.5406	72.1432	137.548
118515906	5.8S ribosomal RNA	102.195	109.307	68.2608	96.2558	77.4369	74.2019	112.438	74.8359	90.9597	102.409	92.4747	83.8817	87.8489	100.189	89.2699	90.1211	83.8658	82.205	76.5406	72.1432	137.548
118515907	5.8S ribosomal RNA	102.195	109.307	68.2608	96.2558	77.4369	74.2019	112.438	74.8359	90.9597	102.409	92.4747	83.8817	87.8489	100.189	89.2699	90.1211	83.8658	82.205	76.5406	72.1432	137.548
118515908	5.8S ribosomal RNA	102.195	109.307	68.2608	96.2558	77.4369	74.2019	112.438	74.8359	90.9597	102.409	92.4747	83.8817	87.8489	100.189	89.2699	90.1211	83.8658	82.205	76.5406	72.1432	137.548
118515916	5.8S ribosomal RNA	102.195	109.307	68.2608	96.2558	77.4369	74.2019	112.438	74.8359	90.9597	102.409	92.4747	83.8817	87.8489	100.189	89.2699	90.1211	83.8658	82.205	76.5406	72.1432	137.548
118515917	5.8S ribosomal RNA	102.195	109.307	68.2608	96.2558	77.4369	74.2019	112.438	74.8359	90.9597	102.409	92.4747	83.8817	87.8489	100.189	89.2699	90.1211	83.8658	82.205	76.5406	72.1432	137.548
118515918	5.8S ribosomal RNA	102.195	109.307	68.2608	96.2558	77.4369	74.2019	112.438	74.8359	90.9597	102.409	92.4747	83.8817	87.8489	100.189	89.2699	90.1211	83.8658	82.205	76.5406	72.1432	137.548
118515919	5.8S ribosomal RNA	102.195	109.307	68.2608	96.2558	77.4369	74.2019	112.438	74.8359	90.9597	102.409	92.4747	83.8817	87.8489	100.189	89.2699	90.1211	83.8658	82.205	76.5406	72.1432	137.548
118515921	5.8S ribosomal RNA	102.195	109.307	68.2608	96.2558	77.4369	74.2019	112.438	74.8359	90.9597	102.409	92.4747	83.8817	87.8489	100.189	89.2699	90.1211	83.8658	82.205	76.5406	72.1432	137.548
118515924	5.8S ribosomal RNA	102.195	109.307	68.2608	96.2558	77.4369	74.2019	112.438	74.8359	90.9597	102.409	92.4747	83.8817	87.8489	100.189	89.2699	90.1211	83.8658	82.205	76.5406	72.1432	137.548
118515926	5.8S ribosomal RNA	102.195	109.307	68.2608	96.2558	77.4369	74.2019	112.438	74.8359	90.9597	102.409	92.4747	83.8817	87.8489	100.189	89.2699	90.1211	83.8658	82.205	76.5406	72.1432	137.548
118515931	5.8S ribosomal RNA	102.195	109.307	68.2608	96.2558	77.4369	74.2019	112.438	74.8359	90.9597	102.409	92.4747	83.8817	87.8489	100.189	89.2699	90.1211	83.8658	82.205	76.5406	72.1432	137.548
118515933	5.8S ribosomal RNA	102.195	109.307	68.2608	96.2558	77.4369	74.2019	112.438	74.8359	90.9597	102.409	92.4747	83.8817	87.8489	100.189	89.2699	90.1211	83.8658	82.205	76.5406	72.1432	137.548
118515937	5.8S ribosomal RNA	102.195	109.307	68.2608	96.2558	77.4369	74.2019	112.438	74.8359	90.9597	102.409	92.4747	83.8817	87.8489	100.189	89.2699	90.1211	83.8658	82.205	76.5406	72.1432	137.548
118515938	5.8S ribosomal RNA	102.195	109.307	68.2608	96.2558	77.4369	74.2019	112.438	74.8359	90.9597	102.409	92.4747	83.8817	87.8489	100.189	89.2699	90.1211	83.8658	82.205	76.5406	72.1432	137.548
118515940	5.8S ribosomal RNA	102.195	109.307	68.2608	96.2558	77.4369	74.2019	112.438	74.8359	90.9597	102.409	92.4747	83.8817	87.8489	100.189	89.2699	90.1211	83.8658	82.205	76.5406	72.1432	137.548
118515945	5.8S ribosomal RNA	102.195	109.307	68.2608	96.2558	77.4369	74.2019	112.438	74.8359	90.9597	102.409	92.4747	83.8817	87.8489	100.189	89.2699	90.1211	83.8658	82.205	76.5406	72.1432	137.548
118515948	5.8S ribosomal RNA	102.195	109.307	68.2608	96.2558	77.4369	74.2019	112.438	74.8359	90.9597	102.409	92.4747	83.8817	87.8489	100.189	89.2699	90.1211	83.8658	82.205	76.5406	72.1432	137.548
118515949	5.8S ribosomal RNA	102.195	109.307	68.2608	96.2558	77.4369	74.2019	112.438	74.8359	90.9597	102.409	92.4747	83.8817	87.8489	100.189	89.2699	90.1211	83.8658	82.205	76.5406	72.1432	137.548
118515951	5.8S ribosomal RNA	102.195	109.307	68.2608	96.2558	77.4369	74.2019	112.438	74.8359	90.9597	102.409	92.4747	83.8817	87.8489	100.189	89.2699	90.1211	83.8658	82.205	76.5406	72.1432	137.548
118515955	5.8S ribosomal RNA	102.195	109.307	68.2608	96.2558	77.4369	74.2019	112.438	74.8359	90.9597	102.409	92.4747	83.8817	87.8489	100.189	89.2699	90.1211	83.8658	82.205	76.5406	72.1432	137.548
118515956	5.8S ribosomal RNA	102.195	109.307	68.2608	96.2558	77.4369	74.2019	112.438	74.8359	90.9597	102.409	92.4747	83.8817	87.8489	100.189	89.2699	90.1211	83.8658	82.205	76.5406	72.1432	137.548
118515960	5.8S ribosomal RNA	102.195	109.307	68.2608	96.2558	77.4369	74.2019	112.438	74.8359	90.9597	102.409	92.4747	83.8817	87.8489	100.189	89.2699	90.1211	83.8658	82.205	76.5406	72.1432	137.548
118515961	5.8S ribosomal RNA	102.195	109.307	68.2608	96.2558	77.4369	74.2019	112.438	74.8359	90.9597	102.409	92.4747	83.8817	87.8489	100.189	89.2699	90.1211	83.8658	82.205	76.5406	72.1432	137.548
118515962	5.8S ribosomal RNA	102.195	109.307	68.2608	96.2558	77.4369	74.2019	112.438	74.8359	90.9597	102.409	92.4747	83.8817	87.8489	100.189	89.2699	90.1211	83.8658	82.205	76.5406	72.1432	137.548
118515965	5.8S ribosomal RNA	102.195	109.307	68.2608	96.2558	77.4369	74.2019	112.438	74.8359	90.9597	102.409	92.4747	83.8817	87.8489	100.189	89.2699	90.1211	83.8658	82.205	76.5406	72.1432	137.548
118515966	5.8S ribosomal RNA	102.195	109.307	68.2608	96.2558	77.4369	74.2019	112.438	74.8359	90.9597	102.409	92.4747	83.8817	87.8489	100.189	89.2699	90.1211	83.8658	82.205	76.5406	72.1432	137.548
118515968	5.8S ribosomal RNA	102.195	109.307	68.2608	96.2558	77.4369	74.2019	112.438	74.8359	90.9597	102.409	92.4747	83.8817	87.8489	100.189	89.2699	90.1211	83.8658	82.205	76.5406	72.1432	137.548
118515970	5.8S ribosomal RNA	102.195	109.307	68.2608	96.2558	77.4369	74.2019	112.438	74.8359	90.9597	102.409	92.4747	83.8817	87.8489	100.189	89.2699	90.1211	83.8658	82.205	76.5406	72.1432	137.548
118515974	5.8S ribosomal RNA	102.195	109.307	68.2608	96.2558	77.4369	74.2019	112.438	74.8359	90.9597	102.409	92.4747	83.8817	87.8489	100.189	89.2699	90.1211	83.8658	82.205	76.5406	72.1432	137.548
118515975	5.8S ribosomal RNA	102.195	109.307	68.2608	96.2558	77.4369	74.2019	112.438	74.8359	90.9597	102.409	92.4747	83.8817	87.8489	100.189	89.2699	90.1211	83.8658	82.205	76.5406	72.1432	137.548
118515976	5.8S ribosomal RNA	102.195	109.307	68.2608	96.2558	77.4369	74.2019	112.438	74.8359	90.9597	102.409	92.4747	83.8817	87.8489	100.189	89.2699	90.1211	83.8658	82.205	76.5406	72.1432	137.548
118515979	5.8S ribosomal RNA	102.195	109.307	68.2608	96.2558	77.4369	74.2019	112.438	74.8359	90.9597	102.409	92.4747	83.8817	87.8489	100.189	89.2699	90.1211	83.8658	82.205	76.5406	72.1432	137.548
118515982	5.8S ribosomal RNA	102.195	109.307	68.2608	96.2558	77.4369	74.2019	112.438	74.8359	90.9597	102.409	92.4747	83.8817	87.8489	100.189	89.2699	90.1211	83.8658	82.205	76.5406	72.1432	137.548
118515983	5.8S ribosomal RNA	102.195	109.307	68.2608	96.2558	77.4369	74.2019	112.438	74.8359	90.9597	102.409	92.4747	83.8817	87.8489	100.189	89.2699	90.1211	83.8658	82.205	76.5406	72.1432	137.548
118515984	5.8S ribosomal RNA	102.195	109.307	68.2608	96.2558	77.4369	74.2019	112.438	74.8359	90.9597	102.409	92.4747	83.8817	87.8489	100.189	89.2699	90.1211	83.8658	82.205	76.5406	72.1432	137.548
118515988	5.8S ribosomal RNA	102.195	109.307	68.2608	96.2558	77.4369	74.2019	112.438	74.8359	90.9597	102.409	92.4747	83.8817	87.8489	100.189	89.2699	90.1211	83.8658	82.205	76.5406	72.1432	137.548
118515989	5.8S ribosomal RNA	4.08081	0	0	3.50767	3.93002	4.07641	9.21984	5.35987	0	0	9.19045	0	0	3.9151	8.68433	16.6684	0	7.0215	3.78351	17.291	3.39264
118515990	5.8S ribosomal RNA	102.195	109.307	68.2608	96.2558	77.4369	74.2019	112.438	74.8359	90.9597	102.409	92.4747	83.8817	87.8489	100.189	89.2699	90.1211	83.8658	82.205	76.5406	72.1432	137.548
118515992	5.8S ribosomal RNA	102.195	109.307	68.2608	96.2558	77.4369	74.2019	112.438	74.8359	90.9597	102.409	92.4747	83.8817	87.8489	100.189	89.2699	90.1211	83.8658	82.205	76.5406	72.1432	137.548
118515994	5.8S ribosomal RNA	102.195	109.307	68.2608	96.2558	77.4369	74.2019	112.438	74.8359	90.9597	102.409	92.4747	83.8817	87.8489	100.189	89.2699	90.1211	83.8658	82.205	76.5406	72.1432	137.548
118516000	5.8S ribosomal RNA	102.195	109.307	68.2608	96.2558	77.4369	74.2019	112.438	74.8359	90.9597	102.409	92.4747	83.8817	87.8489	100.189	89.2699	90.1211	83.8658	82.205	76.5406	72.1432	137.548
118516001	5.8S ribosomal RNA	102.195	109.307	68.2608	96.2558	77.4369	74.2019	112.438	74.8359	90.9597	102.409	92.4747	83.8817	87.8489	100.189	89.2699	90.1211	83.8658	82.205	76.5406	72.1432	137.548
118516002	5.8S ribosomal RNA	102.195	109.307	68.2608	96.2558	77.4369	74.2019	112.438	74.8359	90.9597	102.409	92.4747	83.8817	87.8489	100.189	89.2699	90.1211	83.8658	82.205	76.5406	72.1432	137.548
118516003	5.8S ribosomal RNA	102.195	109.307	68.2608	96.2558	77.4369	74.2019	112.438	74.8359	90.9597	102.409	92.4747	83.8817	87.8489	100.189	89.2699	90.1211	83.8658	82.205	76.5406	72.1432	137.548
118516004	5.8S ribosomal RNA	102.195	109.307	68.2608	96.2558	77.4369	74.2019	112.438	74.8359	90.9597	102.409	92.4747	83.8817	87.8489	100.189	89.2699	90.1211	83.8658	82.205	76.5406	72.1432	137.548
118516007	5.8S ribosomal RNA	102.195	109.307	68.2608	96.2558	77.4369	74.2019	112.438	74.8359	90.9597	102.409	92.4747	83.8817	87.8489	100.189	89.2699	90.1211	83.8658	82.205	76.5406	72.1432	137.548
118516013	5.8S ribosomal RNA	102.195	109.307	68.2608	96.2558	77.4369	74.2019	112.438	74.8359	90.9597	102.409	92.4747	83.8817	87.8489	100.189	89.2699	90.1211	83.8658	82.205	76.5406	72.1432	137.548
118516014	5.8S ribosomal RNA	102.195	109.307	68.2608	96.2558	77.4369	74.2019	112.438	74.8359	90.9597	102.409	92.4747	83.8817	87.8489	100.189	89.2699	90.1211	83.8658	82.205	76.5406	72.1432	137.548
118516015	5.8S ribosomal RNA	102.195	109.307	68.2608	96.2558	77.4369	74.2019	112.438	74.8359	90.9597	102.409	92.4747	83.8817	87.8489	100.189	89.2699	90.1211	83.8658	82.205	76.5406	72.1432	137.548
118516016	5.8S ribosomal RNA	102.195	109.307	68.2608	96.2558	77.4369	74.2019	112.438	74.8359	90.9597	102.409	92.4747	83.8817	87.8489	100.189	89.2699	90.1211	83.8658	82.205	76.5406	72.1432	137.548
118516020	5.8S ribosomal RNA	102.195	109.307	68.2608	96.2558	77.4369	74.2019	112.438	74.8359	90.9597	102.409	92.4747	83.8817	87.8489	100.189	89.2699	90.1211	83.8658	82.205	76.5406	72.1432	137.548
118516021	5.8S ribosomal RNA	102.195	109.307	68.2608	96.2558	77.4369	74.2019	112.438	74.8359	90.9597	102.409	92.4747	83.8817	87.8489	100.189	89.2699	90.1211	83.8658	82.205	76.5406	72.1432	137.548
118516023	5.8S ribosomal RNA	102.195	109.307	68.2608	96.2558	77.4369	74.2019	112.438	74.8359	90.9597	102.409	92.4747	83.8817	87.8489	100.189	89.2699	90.1211	83.8658	82.205	76.5406	72.1432	137.548
118516027	5.8S ribosomal RNA	102.195	109.307	68.2608	96.2558	77.4369	74.2019	112.438	74.8359	90.9597	102.409	92.4747	83.8817	87.8489	100.189	89.2699	90.1211	83.8658	82.205	76.5406	72.1432	137.548
118516028	5.8S ribosomal RNA	102.195	109.307	68.2608	96.2558	77.4369	74.2019	112.438	74.8359	90.9597	102.409	92.4747	83.8817	87.8489	100.189	89.2699	90.1211	83.8658	82.205	76.5406	72.1432	137.548
118516032	5.8S ribosomal RNA	102.195	109.307	68.2608	96.2558	77.4369	74.2019	112.438	74.8359	90.9597	102.409	92.4747	83.8817	87.8489	100.189	89.2699	90.1211	83.8658	82.205	76.5406	72.1432	137.548
118516033	5.8S ribosomal RNA	102.195	109.307	68.2608	96.2558	77.4369	74.2019	112.438	74.8359	90.9597	102.409	92.4747	83.8817	87.8489	100.189	89.2699	90.1211	83.8658	82.205	76.5406	72.1432	137.548
118516034	5.8S ribosomal RNA	102.195	109.307	68.2608	96.2558	77.4369	74.2019	112.438	74.8359	90.9597	102.409	92.4747	83.8817	87.8489	100.189	89.2699	90.1211	83.8658	82.205	76.5406	72.1432	137.548
118516037	5.8S ribosomal RNA	56.1514	72.0939	23.7881	39.3313	26.5632	37.7526	37.5166	34.418	35.719	21.3256	35.1694	28.9879	45.3381	39.8351	63.1452	48.3998	39.4491	28.8677	22.7051	46.1617	52.033
118516038	5.8S ribosomal RNA	102.195	109.307	68.2608	96.2558	77.4369	74.2019	112.438	74.8359	90.9597	102.409	92.4747	83.8817	87.8489	100.189	89.2699	90.1211	83.8658	82.205	76.5406	72.1432	137.548
118516042	5.8S ribosomal RNA	102.195	109.307	68.2608	96.2558	77.4369	74.2019	112.438	74.8359	90.9597	102.409	92.4747	83.8817	87.8489	100.189	89.2699	90.1211	83.8658	82.205	76.5406	72.1432	137.548
118516043	5.8S ribosomal RNA	102.195	109.307	68.2608	96.2558	77.4369	74.2019	112.438	74.8359	90.9597	102.409	92.4747	83.8817	87.8489	100.189	89.2699	90.1211	83.8658	82.205	76.5406	72.1432	137.548
118516044	5.8S ribosomal RNA	102.195	109.307	68.2608	96.2558	77.4369	74.2019	112.438	74.8359	90.9597	102.409	92.4747	83.8817	87.8489	100.189	89.2699	90.1211	83.8658	82.205	76.5406	72.1432	137.548
118516045	5.8S ribosomal RNA	102.195	109.307	68.2608	96.2558	77.4369	74.2019	112.438	74.8359	90.9597	102.409	92.4747	83.8817	87.8489	100.189	89.2699	90.1211	83.8658	82.205	76.5406	72.1432	137.548
118516046	5.8S ribosomal RNA	2.42412	11.5769	2.84826	7.90954	2.32866	0	10.6231	6.24905	5.21217	0	2.57488	5.90626	4.83178	2.24412	0	1.96085	7.39975	4.8762	5.07932	4.40301	30.3654
118516049	5.8S ribosomal RNA	102.195	109.307	68.2608	96.2558	77.4369	74.2019	112.438	74.8359	90.9597	102.409	92.4747	83.8817	87.8489	100.189	89.2699	90.1211	83.8658	82.205	76.5406	72.1432	137.548
118516053	5.8S ribosomal RNA	102.195	109.307	68.2608	96.2558	77.4369	74.2019	112.438	74.8359	90.9597	102.409	92.4747	83.8817	87.8489	100.189	89.2699	90.1211	83.8658	82.205	76.5406	72.1432	137.548
118516054	5.8S ribosomal RNA	102.195	109.307	68.2608	96.2558	77.4369	74.2019	112.438	74.8359	90.9597	102.409	92.4747	83.8817	87.8489	100.189	89.2699	90.1211	83.8658	82.205	76.5406	72.1432	137.548
118516056	5.8S ribosomal RNA	102.195	109.307	68.2608	96.2558	77.4369	74.2019	112.438	74.8359	90.9597	102.409	92.4747	83.8817	87.8489	100.189	89.2699	90.1211	83.8658	82.205	76.5406	72.1432	137.548
118516057	5.8S ribosomal RNA	102.195	109.307	68.2608	96.2558	77.4369	74.2019	112.438	74.8359	90.9597	102.409	92.4747	83.8817	87.8489	100.189	89.2699	90.1211	83.8658	82.205	76.5406	72.1432	137.548
118516058	5.8S ribosomal RNA	102.195	109.307	68.2608	96.2558	77.4369	74.2019	112.438	74.8359	90.9597	102.409	92.4747	83.8817	87.8489	100.189	89.2699	90.1211	83.8658	82.205	76.5406	72.1432	137.548
118516059	5.8S ribosomal RNA	102.195	109.307	68.2608	96.2558	77.4369	74.2019	112.438	74.8359	90.9597	102.409	92.4747	83.8817	87.8489	100.189	89.2699	90.1211	83.8658	82.205	76.5406	72.1432	137.548
118516060	5.8S ribosomal RNA	102.195	109.307	68.2608	96.2558	77.4369	74.2019	112.438	74.8359	90.9597	102.409	92.4747	83.8817	87.8489	100.189	89.2699	90.1211	83.8658	82.205	76.5406	72.1432	137.548
118516061	5.8S ribosomal RNA	102.195	109.307	68.2608	96.2558	77.4369	74.2019	112.438	74.8359	90.9597	102.409	92.4747	83.8817	87.8489	100.189	89.2699	90.1211	83.8658	82.205	76.5406	72.1432	137.548
118516062	5.8S ribosomal RNA	102.195	109.307	68.2608	96.2558	77.4369	74.2019	112.438	74.8359	90.9597	102.409	92.4747	83.8817	87.8489	100.189	89.2699	90.1211	83.8658	82.205	76.5406	72.1432	137.548
118516067	5.8S ribosomal RNA	102.195	109.307	68.2608	96.2558	77.4369	74.2019	112.438	74.8359	90.9597	102.409	92.4747	83.8817	87.8489	100.189	89.2699	90.1211	83.8658	82.205	76.5406	72.1432	137.548
118516073	5.8S ribosomal RNA	102.195	109.307	68.2608	96.2558	77.4369	74.2019	112.438	74.8359	90.9597	102.409	92.4747	83.8817	87.8489	100.189	89.2699	90.1211	83.8658	82.205	76.5406	72.1432	137.548
118516074	5.8S ribosomal RNA	102.195	109.307	68.2608	96.2558	77.4369	74.2019	112.438	74.8359	90.9597	102.409	92.4747	83.8817	87.8489	100.189	89.2699	90.1211	83.8658	82.205	76.5406	72.1432	137.548
118516075	5.8S ribosomal RNA	102.195	109.307	68.2608	96.2558	77.4369	74.2019	112.438	74.8359	90.9597	102.409	92.4747	83.8817	87.8489	100.189	89.2699	90.1211	83.8658	82.205	76.5406	72.1432	137.548
118516080	5.8S ribosomal RNA	102.195	109.307	68.2608	96.2558	77.4369	74.2019	112.438	74.8359	90.9597	102.409	92.4747	83.8817	87.8489	100.189	89.2699	90.1211	83.8658	82.205	76.5406	72.1432	137.548
118516081	5.8S ribosomal RNA	102.195	109.307	68.2608	96.2558	77.4369	74.2019	112.438	74.8359	90.9597	102.409	92.4747	83.8817	87.8489	100.189	89.2699	90.1211	83.8658	82.205	76.5406	72.1432	137.548
118516083	5.8S ribosomal RNA	102.195	109.307	68.2608	96.2558	77.4369	74.2019	112.438	74.8359	90.9597	102.409	92.4747	83.8817	87.8489	100.189	89.2699	90.1211	83.8658	82.205	76.5406	72.1432	137.548
118516086	5.8S ribosomal RNA	102.195	109.307	68.2608	96.2558	77.4369	74.2019	112.438	74.8359	90.9597	102.409	92.4747	83.8817	87.8489	100.189	89.2699	90.1211	83.8658	82.205	76.5406	72.1432	137.548
118516087	5.8S ribosomal RNA	102.195	109.307	68.2608	96.2558	77.4369	74.2019	112.438	74.8359	90.9597	102.409	92.4747	83.8817	87.8489	100.189	89.2699	90.1211	83.8658	82.205	76.5406	72.1432	137.548
118516092	5.8S ribosomal RNA	102.195	109.307	68.2608	96.2558	77.4369	74.2019	112.438	74.8359	90.9597	102.409	92.4747	83.8817	87.8489	100.189	89.2699	90.1211	83.8658	82.205	76.5406	72.1432	137.548
118516093	5.8S ribosomal RNA	102.195	109.307	68.2608	96.2558	77.4369	74.2019	112.438	74.8359	90.9597	102.409	92.4747	83.8817	87.8489	100.189	89.2699	90.1211	83.8658	82.205	76.5406	72.1432	137.548
118516094	5.8S ribosomal RNA	102.195	109.307	68.2608	96.2558	77.4369	74.2019	112.438	74.8359	90.9597	102.409	92.4747	83.8817	87.8489	100.189	89.2699	90.1211	83.8658	82.205	76.5406	72.1432	137.548
118516095	5.8S ribosomal RNA	102.195	109.307	68.2608	96.2558	77.4369	74.2019	112.438	74.8359	90.9597	102.409	92.4747	83.8817	87.8489	100.189	89.2699	90.1211	83.8658	82.205	76.5406	72.1432	137.548
118516099	5.8S ribosomal RNA	102.195	109.307	68.2608	96.2558	77.4369	74.2019	112.438	74.8359	90.9597	102.409	92.4747	83.8817	87.8489	100.189	89.2699	90.1211	83.8658	82.205	76.5406	72.1432	137.548
118516100	5.8S ribosomal RNA	102.195	109.307	68.2608	96.2558	77.4369	74.2019	112.438	74.8359	90.9597	102.409	92.4747	83.8817	87.8489	100.189	89.2699	90.1211	83.8658	82.205	76.5406	72.1432	137.548
118516101	5.8S ribosomal RNA	102.195	109.307	68.2608	96.2558	77.4369	74.2019	112.438	74.8359	90.9597	102.409	92.4747	83.8817	87.8489	100.189	89.2699	90.1211	83.8658	82.205	76.5406	72.1432	137.548
118516105	5.8S ribosomal RNA	102.195	109.307	68.2608	96.2558	77.4369	74.2019	112.438	74.8359	90.9597	102.409	92.4747	83.8817	87.8489	100.189	89.2699	90.1211	83.8658	82.205	76.5406	72.1432	137.548
118516106	5.8S ribosomal RNA	19.0727	21.8584	13.3188	27.0641	2.57118	7.69563	2.78415	3.33251	35.4042	21.5238	32.7353	14.2849	16.1024	23.9307	11.9701	17.4393	4.07459	3.53899	0.507246	0.465006	12.9717
118516107	5.8S ribosomal RNA	102.195	109.307	68.2608	96.2558	77.4369	74.2019	112.438	74.8359	90.9597	102.409	92.4747	83.8817	87.8489	100.189	89.2699	90.1211	83.8658	82.205	76.5406	72.1432	137.548
118516112	5.8S ribosomal RNA	102.195	109.307	68.2608	96.2558	77.4369	74.2019	112.438	74.8359	90.9597	102.409	92.4747	83.8817	87.8489	100.189	89.2699	90.1211	83.8658	82.205	76.5406	72.1432	137.548
118516114	5.8S ribosomal RNA	102.195	109.307	68.2608	96.2558	77.4369	74.2019	112.438	74.8359	90.9597	102.409	92.4747	83.8817	87.8489	100.189	89.2699	90.1211	83.8658	82.205	76.5406	72.1432	137.548
118516116	5.8S ribosomal RNA	102.195	109.307	68.2608	96.2558	77.4369	74.2019	112.438	74.8359	90.9597	102.409	92.4747	83.8817	87.8489	100.189	89.2699	90.1211	83.8658	82.205	76.5406	72.1432	137.548
118516118	5.8S ribosomal RNA	102.195	109.307	68.2608	96.2558	77.4369	74.2019	112.438	74.8359	90.9597	102.409	92.4747	83.8817	87.8489	100.189	89.2699	90.1211	83.8658	82.205	76.5406	72.1432	137.548
118516122	5.8S ribosomal RNA	102.195	109.307	68.2608	96.2558	77.4369	74.2019	112.438	74.8359	90.9597	102.409	92.4747	83.8817	87.8489	100.189	89.2699	90.1211	83.8658	82.205	76.5406	72.1432	137.548
118516126	5.8S ribosomal RNA	102.195	109.307	68.2608	96.2558	77.4369	74.2019	112.438	74.8359	90.9597	102.409	92.4747	83.8817	87.8489	100.189	89.2699	90.1211	83.8658	82.205	76.5406	72.1432	137.548
118516127	5.8S ribosomal RNA	102.195	109.307	68.2608	96.2558	77.4369	74.2019	112.438	74.8359	90.9597	102.409	92.4747	83.8817	87.8489	100.189	89.2699	90.1211	83.8658	82.205	76.5406	72.1432	137.548
118516128	5.8S ribosomal RNA	102.195	109.307	68.2608	96.2558	77.4369	74.2019	112.438	74.8359	90.9597	102.409	92.4747	83.8817	87.8489	100.189	89.2699	90.1211	83.8658	82.205	76.5406	72.1432	137.548
118516132	5.8S ribosomal RNA	102.195	109.307	68.2608	96.2558	77.4369	74.2019	112.438	74.8359	90.9597	102.409	92.4747	83.8817	87.8489	100.189	89.2699	90.1211	83.8658	82.205	76.5406	72.1432	137.548
118516133	5.8S ribosomal RNA	102.195	109.307	68.2608	96.2558	77.4369	74.2019	112.438	74.8359	90.9597	102.409	92.4747	83.8817	87.8489	100.189	89.2699	90.1211	83.8658	82.205	76.5406	72.1432	137.548
118516134	5.8S ribosomal RNA	102.195	109.307	68.2608	96.2558	77.4369	74.2019	112.438	74.8359	90.9597	102.409	92.4747	83.8817	87.8489	100.189	89.2699	90.1211	83.8658	82.205	76.5406	72.1432	137.548
118516136	5.8S ribosomal RNA	102.195	109.307	68.2608	96.2558	77.4369	74.2019	112.438	74.8359	90.9597	102.409	92.4747	83.8817	87.8489	100.189	89.2699	90.1211	83.8658	82.205	76.5406	72.1432	137.548
118516140	5.8S ribosomal RNA	102.195	109.307	68.2608	96.2558	77.4369	74.2019	112.438	74.8359	90.9597	102.409	92.4747	83.8817	87.8489	100.189	89.2699	90.1211	83.8658	82.205	76.5406	72.1432	137.548
118516141	5.8S ribosomal RNA	27.144	30.2918	24.8814	12.2478	22.8538	19.7568	33.3482	11.7501	15.7102	38.5474	20.6035	0	23.5037	13.7376	20.1155	38.4553	36.4054	25.3043	13.947	5.22429	33.0438
118516143	5.8S ribosomal RNA	102.195	109.307	68.2608	96.2558	77.4369	74.2019	112.438	74.8359	90.9597	102.409	92.4747	83.8817	87.8489	100.189	89.2699	90.1211	83.8658	82.205	76.5406	72.1432	137.548
118516146	5.8S ribosomal RNA	102.195	109.307	68.2608	96.2558	77.4369	74.2019	112.438	74.8359	90.9597	102.409	92.4747	83.8817	87.8489	100.189	89.2699	90.1211	83.8658	82.205	76.5406	72.1432	137.548
118516147	5.8S ribosomal RNA	102.195	109.307	68.2608	96.2558	77.4369	74.2019	112.438	74.8359	90.9597	102.409	92.4747	83.8817	87.8489	100.189	89.2699	90.1211	83.8658	82.205	76.5406	72.1432	137.548
118516149	5.8S ribosomal RNA	102.195	109.307	68.2608	96.2558	77.4369	74.2019	112.438	74.8359	90.9597	102.409	92.4747	83.8817	87.8489	100.189	89.2699	90.1211	83.8658	82.205	76.5406	72.1432	137.548
118516151	5.8S ribosomal RNA	102.195	109.307	68.2608	96.2558	77.4369	74.2019	112.438	74.8359	90.9597	102.409	92.4747	83.8817	87.8489	100.189	89.2699	90.1211	83.8658	82.205	76.5406	72.1432	137.548
118516154	5.8S ribosomal RNA	0	0	0	0	3.46753	0	0	0	3.55796	0	0	0	8.60525	0	0	5.028	0	11.7853	0	0	3.64255
118516156	5.8S ribosomal RNA	102.195	109.307	68.2608	96.2558	77.4369	74.2019	112.438	74.8359	90.9597	102.409	92.4747	83.8817	87.8489	100.189	89.2699	90.1211	83.8658	82.205	76.5406	72.1432	137.548
118516159	5.8S ribosomal RNA	102.195	109.307	68.2608	96.2558	77.4369	74.2019	112.438	74.8359	90.9597	102.409	92.4747	83.8817	87.8489	100.189	89.2699	90.1211	83.8658	82.205	76.5406	72.1432	137.548
118516160	5.8S ribosomal RNA	102.195	109.307	68.2608	96.2558	77.4369	74.2019	112.438	74.8359	90.9597	102.409	92.4747	83.8817	87.8489	100.189	89.2699	90.1211	83.8658	82.205	76.5406	72.1432	137.548
118516165	5.8S ribosomal RNA	102.195	109.307	68.2608	96.2558	77.4369	74.2019	112.438	74.8359	90.9597	102.409	92.4747	83.8817	87.8489	100.189	89.2699	90.1211	83.8658	82.205	76.5406	72.1432	137.548
118516166	5.8S ribosomal RNA	102.195	109.307	68.2608	96.2558	77.4369	74.2019	112.438	74.8359	90.9597	102.409	92.4747	83.8817	87.8489	100.189	89.2699	90.1211	83.8658	82.205	76.5406	72.1432	137.548
118516167	5.8S ribosomal RNA	102.195	109.307	68.2608	96.2558	77.4369	74.2019	112.438	74.8359	90.9597	102.409	92.4747	83.8817	87.8489	100.189	89.2699	90.1211	83.8658	82.205	76.5406	72.1432	137.548
118516171	5.8S ribosomal RNA	102.195	109.307	68.2608	96.2558	77.4369	74.2019	112.438	74.8359	90.9597	102.409	92.4747	83.8817	87.8489	100.189	89.2699	90.1211	83.8658	82.205	76.5406	72.1432	137.548
118516172	5.8S ribosomal RNA	102.195	109.307	68.2608	96.2558	77.4369	74.2019	112.438	74.8359	90.9597	102.409	92.4747	83.8817	87.8489	100.189	89.2699	90.1211	83.8658	82.205	76.5406	72.1432	137.548
118516178	5.8S ribosomal RNA	102.195	109.307	68.2608	96.2558	77.4369	74.2019	112.438	74.8359	90.9597	102.409	92.4747	83.8817	87.8489	100.189	89.2699	90.1211	83.8658	82.205	76.5406	72.1432	137.548
118516180	5.8S ribosomal RNA	102.195	109.307	68.2608	96.2558	77.4369	74.2019	112.438	74.8359	90.9597	102.409	92.4747	83.8817	87.8489	100.189	89.2699	90.1211	83.8658	82.205	76.5406	72.1432	137.548
118516181	5.8S ribosomal RNA	2.42412	11.5769	2.84826	7.90954	2.32866	0	10.6231	6.24905	5.21217	0	2.57488	5.90626	4.83178	2.24412	0	1.96085	7.39975	4.8762	5.07932	4.40301	30.3654
118516183	5.8S ribosomal RNA	102.195	109.307	68.2608	96.2558	77.4369	74.2019	112.438	74.8359	90.9597	102.409	92.4747	83.8817	87.8489	100.189	89.2699	90.1211	83.8658	82.205	76.5406	72.1432	137.548
118516186	5.8S ribosomal RNA	102.195	109.307	68.2608	96.2558	77.4369	74.2019	112.438	74.8359	90.9597	102.409	92.4747	83.8817	87.8489	100.189	89.2699	90.1211	83.8658	82.205	76.5406	72.1432	137.548
118516188	5.8S ribosomal RNA	102.195	109.307	68.2608	96.2558	77.4369	74.2019	112.438	74.8359	90.9597	102.409	92.4747	83.8817	87.8489	100.189	89.2699	90.1211	83.8658	82.205	76.5406	72.1432	137.548
118516191	5.8S ribosomal RNA	102.195	109.307	68.2608	96.2558	77.4369	74.2019	112.438	74.8359	90.9597	102.409	92.4747	83.8817	87.8489	100.189	89.2699	90.1211	83.8658	82.205	76.5406	72.1432	137.548
118516193	5.8S ribosomal RNA	102.195	109.307	68.2608	96.2558	77.4369	74.2019	112.438	74.8359	90.9597	102.409	92.4747	83.8817	87.8489	100.189	89.2699	90.1211	83.8658	82.205	76.5406	72.1432	137.548
118516196	5.8S ribosomal RNA	102.195	109.307	68.2608	96.2558	77.4369	74.2019	112.438	74.8359	90.9597	102.409	92.4747	83.8817	87.8489	100.189	89.2699	90.1211	83.8658	82.205	76.5406	72.1432	137.548
118516197	5.8S ribosomal RNA	6.36475	3.1414	3.83322	0	3.0117	3.08555	7.09394	4.0292	3.52347	3.60958	6.98684	4.00382	3.10063	6.02509	0	12.4633	7.58154	10.6708	5.68166	3.25835	21.1387
118516202	5.8S ribosomal RNA	102.195	109.307	68.2608	96.2558	77.4369	74.2019	112.438	74.8359	90.9597	102.409	92.4747	83.8817	87.8489	100.189	89.2699	90.1211	83.8658	82.205	76.5406	72.1432	137.548
118516203	5.8S ribosomal RNA	102.195	109.307	68.2608	96.2558	77.4369	74.2019	112.438	74.8359	90.9597	102.409	92.4747	83.8817	87.8489	100.189	89.2699	90.1211	83.8658	82.205	76.5406	72.1432	137.548
118516205	5.8S ribosomal RNA	102.195	109.307	68.2608	96.2558	77.4369	74.2019	112.438	74.8359	90.9597	102.409	92.4747	83.8817	87.8489	100.189	89.2699	90.1211	83.8658	82.205	76.5406	72.1432	137.548
118516210	5.8S ribosomal RNA	102.195	109.307	68.2608	96.2558	77.4369	74.2019	112.438	74.8359	90.9597	102.409	92.4747	83.8817	87.8489	100.189	89.2699	90.1211	83.8658	82.205	76.5406	72.1432	137.548
118516211	5.8S ribosomal RNA	102.195	109.307	68.2608	96.2558	77.4369	74.2019	112.438	74.8359	90.9597	102.409	92.4747	83.8817	87.8489	100.189	89.2699	90.1211	83.8658	82.205	76.5406	72.1432	137.548
118516214	5.8S ribosomal RNA	102.195	109.307	68.2608	96.2558	77.4369	74.2019	112.438	74.8359	90.9597	102.409	92.4747	83.8817	87.8489	100.189	89.2699	90.1211	83.8658	82.205	76.5406	72.1432	137.548
118516215	5.8S ribosomal RNA	102.195	109.307	68.2608	96.2558	77.4369	74.2019	112.438	74.8359	90.9597	102.409	92.4747	83.8817	87.8489	100.189	89.2699	90.1211	83.8658	82.205	76.5406	72.1432	137.548
118516219	5.8S ribosomal RNA	102.195	109.307	68.2608	96.2558	77.4369	74.2019	112.438	74.8359	90.9597	102.409	92.4747	83.8817	87.8489	100.189	89.2699	90.1211	83.8658	82.205	76.5406	72.1432	137.548
118516220	5.8S ribosomal RNA	102.195	109.307	68.2608	96.2558	77.4369	74.2019	112.438	74.8359	90.9597	102.409	92.4747	83.8817	87.8489	100.189	89.2699	90.1211	83.8658	82.205	76.5406	72.1432	137.548
118516221	5.8S ribosomal RNA	102.195	109.307	68.2608	96.2558	77.4369	74.2019	112.438	74.8359	90.9597	102.409	92.4747	83.8817	87.8489	100.189	89.2699	90.1211	83.8658	82.205	76.5406	72.1432	137.548
118516224	5.8S ribosomal RNA	102.195	109.307	68.2608	96.2558	77.4369	74.2019	112.438	74.8359	90.9597	102.409	92.4747	83.8817	87.8489	100.189	89.2699	90.1211	83.8658	82.205	76.5406	72.1432	137.548
118516226	5.8S ribosomal RNA	102.195	109.307	68.2608	96.2558	77.4369	74.2019	112.438	74.8359	90.9597	102.409	92.4747	83.8817	87.8489	100.189	89.2699	90.1211	83.8658	82.205	76.5406	72.1432	137.548
118516228	5.8S ribosomal RNA	102.195	109.307	68.2608	96.2558	77.4369	74.2019	112.438	74.8359	90.9597	102.409	92.4747	83.8817	87.8489	100.189	89.2699	90.1211	83.8658	82.205	76.5406	72.1432	137.548
118516231	5.8S ribosomal RNA	102.195	109.307	68.2608	96.2558	77.4369	74.2019	112.438	74.8359	90.9597	102.409	92.4747	83.8817	87.8489	100.189	89.2699	90.1211	83.8658	82.205	76.5406	72.1432	137.548
118516234	5.8S ribosomal RNA	102.195	109.307	68.2608	96.2558	77.4369	74.2019	112.438	74.8359	90.9597	102.409	92.4747	83.8817	87.8489	100.189	89.2699	90.1211	83.8658	82.205	76.5406	72.1432	137.548
118516236	5.8S ribosomal RNA	102.195	109.307	68.2608	96.2558	77.4369	74.2019	112.438	74.8359	90.9597	102.409	92.4747	83.8817	87.8489	100.189	89.2699	90.1211	83.8658	82.205	76.5406	72.1432	137.548
118516240	5.8S ribosomal RNA	102.195	109.307	68.2608	96.2558	77.4369	74.2019	112.438	74.8359	90.9597	102.409	92.4747	83.8817	87.8489	100.189	89.2699	90.1211	83.8658	82.205	76.5406	72.1432	137.548
118516241	5.8S ribosomal RNA	102.195	109.307	68.2608	96.2558	77.4369	74.2019	112.438	74.8359	90.9597	102.409	92.4747	83.8817	87.8489	100.189	89.2699	90.1211	83.8658	82.205	76.5406	72.1432	137.548
118516242	5.8S ribosomal RNA	102.195	109.307	68.2608	96.2558	77.4369	74.2019	112.438	74.8359	90.9597	102.409	92.4747	83.8817	87.8489	100.189	89.2699	90.1211	83.8658	82.205	76.5406	72.1432	137.548
118516245	5.8S ribosomal RNA	102.195	109.307	68.2608	96.2558	77.4369	74.2019	112.438	74.8359	90.9597	102.409	92.4747	83.8817	87.8489	100.189	89.2699	90.1211	83.8658	82.205	76.5406	72.1432	137.548
118516246	5.8S ribosomal RNA	102.195	109.307	68.2608	96.2558	77.4369	74.2019	112.438	74.8359	90.9597	102.409	92.4747	83.8817	87.8489	100.189	89.2699	90.1211	83.8658	82.205	76.5406	72.1432	137.548
118516250	5.8S ribosomal RNA	102.195	109.307	68.2608	96.2558	77.4369	74.2019	112.438	74.8359	90.9597	102.409	92.4747	83.8817	87.8489	100.189	89.2699	90.1211	83.8658	82.205	76.5406	72.1432	137.548
118516253	5.8S ribosomal RNA	102.195	109.307	68.2608	96.2558	77.4369	74.2019	112.438	74.8359	90.9597	102.409	92.4747	83.8817	87.8489	100.189	89.2699	90.1211	83.8658	82.205	76.5406	72.1432	137.548
118516254	5.8S ribosomal RNA	102.195	109.307	68.2608	96.2558	77.4369	74.2019	112.438	74.8359	90.9597	102.409	92.4747	83.8817	87.8489	100.189	89.2699	90.1211	83.8658	82.205	76.5406	72.1432	137.548
118516255	5.8S ribosomal RNA	102.195	109.307	68.2608	96.2558	77.4369	74.2019	112.438	74.8359	90.9597	102.409	92.4747	83.8817	87.8489	100.189	89.2699	90.1211	83.8658	82.205	76.5406	72.1432	137.548
118516258	5.8S ribosomal RNA	79.1489	121.969	45.4485	36.911	44.2849	60.5907	59.3771	47.2913	61.7454	71.1952	23.9098	39.0845	73.6454	68.1069	65.2955	130.667	90.892	80.1562	80.3447	66.0498	123.826
118516259	5.8S ribosomal RNA	102.195	109.307	68.2608	96.2558	77.4369	74.2019	112.438	74.8359	90.9597	102.409	92.4747	83.8817	87.8489	100.189	89.2699	90.1211	83.8658	82.205	76.5406	72.1432	137.548
118516262	5.8S ribosomal RNA	102.195	109.307	68.2608	96.2558	77.4369	74.2019	112.438	74.8359	90.9597	102.409	92.4747	83.8817	87.8489	100.189	89.2699	90.1211	83.8658	82.205	76.5406	72.1432	137.548
118516263	5.8S ribosomal RNA	102.195	109.307	68.2608	96.2558	77.4369	74.2019	112.438	74.8359	90.9597	102.409	92.4747	83.8817	87.8489	100.189	89.2699	90.1211	83.8658	82.205	76.5406	72.1432	137.548
118516268	5.8S ribosomal RNA	3.16909	12.5537	0	7.96648	11.9037	3.05744	10.5887	19.9488	24.33	10.7618	17.2622	11.8649	18.4951	8.97901	13.1328	19.6212	19.9927	28.8997	11.2398	12.8114	15.716
118516269	5.8S ribosomal RNA	2.95413	2.85339	3.49168	2.88842	3.4458	2.79623	12.8542	5.04754	0	3.26691	0	3.59701	2.7956	5.46495	0	4.40166	11.136	9.34788	2.51526	0	9.4446
118516270	5.8S ribosomal RNA	102.195	109.307	68.2608	96.2558	77.4369	74.2019	112.438	74.8359	90.9597	102.409	92.4747	83.8817	87.8489	100.189	89.2699	90.1211	83.8658	82.205	76.5406	72.1432	137.548
118516274	5.8S ribosomal RNA	102.195	109.307	68.2608	96.2558	77.4369	74.2019	112.438	74.8359	90.9597	102.409	92.4747	83.8817	87.8489	100.189	89.2699	90.1211	83.8658	82.205	76.5406	72.1432	137.548
118516275	5.8S ribosomal RNA	35.4719	24.569	18.3435	44.7561	24.3657	26.4622	39.0567	32.5032	14.2696	38.0026	26.436	26.5498	5.16246	41.6693	22.1344	31.5987	24.53	36.5387	46.5665	15.4777	45.2441
118516276	5.8S ribosomal RNA	102.195	109.307	68.2608	96.2558	77.4369	74.2019	112.438	74.8359	90.9597	102.409	92.4747	83.8817	87.8489	100.189	89.2699	90.1211	83.8658	82.205	76.5406	72.1432	137.548
118516279	5.8S ribosomal RNA	102.195	109.307	68.2608	96.2558	77.4369	74.2019	112.438	74.8359	90.9597	102.409	92.4747	83.8817	87.8489	100.189	89.2699	90.1211	83.8658	82.205	76.5406	72.1432	137.548
118516282	5.8S ribosomal RNA	102.195	109.307	68.2608	96.2558	77.4369	74.2019	112.438	74.8359	90.9597	102.409	92.4747	83.8817	87.8489	100.189	89.2699	90.1211	83.8658	82.205	76.5406	72.1432	137.548
118516288	5.8S ribosomal RNA	102.195	109.307	68.2608	96.2558	77.4369	74.2019	112.438	74.8359	90.9597	102.409	92.4747	83.8817	87.8489	100.189	89.2699	90.1211	83.8658	82.205	76.5406	72.1432	137.548
118516289	5.8S ribosomal RNA	102.195	109.307	68.2608	96.2558	77.4369	74.2019	112.438	74.8359	90.9597	102.409	92.4747	83.8817	87.8489	100.189	89.2699	90.1211	83.8658	82.205	76.5406	72.1432	137.548
118516290	5.8S ribosomal RNA	102.195	109.307	68.2608	96.2558	77.4369	74.2019	112.438	74.8359	90.9597	102.409	92.4747	83.8817	87.8489	100.189	89.2699	90.1211	83.8658	82.205	76.5406	72.1432	137.548
118516292	5.8S ribosomal RNA	102.195	109.307	68.2608	96.2558	77.4369	74.2019	112.438	74.8359	90.9597	102.409	92.4747	83.8817	87.8489	100.189	89.2699	90.1211	83.8658	82.205	76.5406	72.1432	137.548
118516296	5.8S ribosomal RNA	102.195	109.307	68.2608	96.2558	77.4369	74.2019	112.438	74.8359	90.9597	102.409	92.4747	83.8817	87.8489	100.189	89.2699	90.1211	83.8658	82.205	76.5406	72.1432	137.548
118516297	5.8S ribosomal RNA	102.195	109.307	68.2608	96.2558	77.4369	74.2019	112.438	74.8359	90.9597	102.409	92.4747	83.8817	87.8489	100.189	89.2699	90.1211	83.8658	82.205	76.5406	72.1432	137.548
118516302	5.8S ribosomal RNA	102.195	109.307	68.2608	96.2558	77.4369	74.2019	112.438	74.8359	90.9597	102.409	92.4747	83.8817	87.8489	100.189	89.2699	90.1211	83.8658	82.205	76.5406	72.1432	137.548
118516306	5.8S ribosomal RNA	102.195	109.307	68.2608	96.2558	77.4369	74.2019	112.438	74.8359	90.9597	102.409	92.4747	83.8817	87.8489	100.189	89.2699	90.1211	83.8658	82.205	76.5406	72.1432	137.548
118516312	5.8S ribosomal RNA	102.195	109.307	68.2608	96.2558	77.4369	74.2019	112.438	74.8359	90.9597	102.409	92.4747	83.8817	87.8489	100.189	89.2699	90.1211	83.8658	82.205	76.5406	72.1432	137.548
118516316	5.8S ribosomal RNA	102.195	109.307	68.2608	96.2558	77.4369	74.2019	112.438	74.8359	90.9597	102.409	92.4747	83.8817	87.8489	100.189	89.2699	90.1211	83.8658	82.205	76.5406	72.1432	137.548
118516317	5.8S ribosomal RNA	102.195	109.307	68.2608	96.2558	77.4369	74.2019	112.438	74.8359	90.9597	102.409	92.4747	83.8817	87.8489	100.189	89.2699	90.1211	83.8658	82.205	76.5406	72.1432	137.548
118516319	5.8S ribosomal RNA	102.195	109.307	68.2608	96.2558	77.4369	74.2019	112.438	74.8359	90.9597	102.409	92.4747	83.8817	87.8489	100.189	89.2699	90.1211	83.8658	82.205	76.5406	72.1432	137.548
118516322	5.8S ribosomal RNA	102.195	109.307	68.2608	96.2558	77.4369	74.2019	112.438	74.8359	90.9597	102.409	92.4747	83.8817	87.8489	100.189	89.2699	90.1211	83.8658	82.205	76.5406	72.1432	137.548
118516323	5.8S ribosomal RNA	102.195	109.307	68.2608	96.2558	77.4369	74.2019	112.438	74.8359	90.9597	102.409	92.4747	83.8817	87.8489	100.189	89.2699	90.1211	83.8658	82.205	76.5406	72.1432	137.548
118516324	5.8S ribosomal RNA	102.195	109.307	68.2608	96.2558	77.4369	74.2019	112.438	74.8359	90.9597	102.409	92.4747	83.8817	87.8489	100.189	89.2699	90.1211	83.8658	82.205	76.5406	72.1432	137.548
118516326	5.8S ribosomal RNA	102.195	109.307	68.2608	96.2558	77.4369	74.2019	112.438	74.8359	90.9597	102.409	92.4747	83.8817	87.8489	100.189	89.2699	90.1211	83.8658	82.205	76.5406	72.1432	137.548
118516638	5.8S ribosomal RNA	102.195	109.307	68.2608	96.2558	77.4369	74.2019	112.438	74.8359	90.9597	102.409	92.4747	83.8817	87.8489	100.189	89.2699	90.1211	83.8658	82.205	76.5406	72.1432	137.548
118516639	5.8S ribosomal RNA	102.195	109.307	68.2608	96.2558	77.4369	74.2019	112.438	74.8359	90.9597	102.409	92.4747	83.8817	87.8489	100.189	89.2699	90.1211	83.8658	82.205	76.5406	72.1432	137.548
118516640	5.8S ribosomal RNA	102.195	109.307	68.2608	96.2558	77.4369	74.2019	112.438	74.8359	90.9597	102.409	92.4747	83.8817	87.8489	100.189	89.2699	90.1211	83.8658	82.205	76.5406	72.1432	137.548
118516641	5.8S ribosomal RNA	108.768	65.7389	43.6084	36.7925	32.1006	79.212	61.3346	35.3634	47.1808	93.6988	30.9371	35.9138	37.6543	73.3725	55.433	69.3557	77.1229	67.6822	65.4079	36.7567	140.748
118516642	5.8S ribosomal RNA	102.195	109.307	68.2608	96.2558	77.4369	74.2019	112.438	74.8359	90.9597	102.409	92.4747	83.8817	87.8489	100.189	89.2699	90.1211	83.8658	82.205	76.5406	72.1432	137.548
118516650	5.8S ribosomal RNA	102.195	109.307	68.2608	96.2558	77.4369	74.2019	112.438	74.8359	90.9597	102.409	92.4747	83.8817	87.8489	100.189	89.2699	90.1211	83.8658	82.205	76.5406	72.1432	137.548
118516652	5.8S ribosomal RNA	102.195	109.307	68.2608	96.2558	77.4369	74.2019	112.438	74.8359	90.9597	102.409	92.4747	83.8817	87.8489	100.189	89.2699	90.1211	83.8658	82.205	76.5406	72.1432	137.548
118516653	5.8S ribosomal RNA	102.195	109.307	68.2608	96.2558	77.4369	74.2019	112.438	74.8359	90.9597	102.409	92.4747	83.8817	87.8489	100.189	89.2699	90.1211	83.8658	82.205	76.5406	72.1432	137.548
118516664	5.8S ribosomal RNA	102.195	109.307	68.2608	96.2558	77.4369	74.2019	112.438	74.8359	90.9597	102.409	92.4747	83.8817	87.8489	100.189	89.2699	90.1211	83.8658	82.205	76.5406	72.1432	137.548
118516665	5.8S ribosomal RNA	102.195	109.307	68.2608	96.2558	77.4369	74.2019	112.438	74.8359	90.9597	102.409	92.4747	83.8817	87.8489	100.189	89.2699	90.1211	83.8658	82.205	76.5406	72.1432	137.548
118516666	5.8S ribosomal RNA	102.195	109.307	68.2608	96.2558	77.4369	74.2019	112.438	74.8359	90.9597	102.409	92.4747	83.8817	87.8489	100.189	89.2699	90.1211	83.8658	82.205	76.5406	72.1432	137.548
118516667	5.8S ribosomal RNA	102.195	109.307	68.2608	96.2558	77.4369	74.2019	112.438	74.8359	90.9597	102.409	92.4747	83.8817	87.8489	100.189	89.2699	90.1211	83.8658	82.205	76.5406	72.1432	137.548
118516668	5.8S ribosomal RNA	102.195	109.307	68.2608	96.2558	77.4369	74.2019	112.438	74.8359	90.9597	102.409	92.4747	83.8817	87.8489	100.189	89.2699	90.1211	83.8658	82.205	76.5406	72.1432	137.548
118516669	5.8S ribosomal RNA	102.195	109.307	68.2608	96.2558	77.4369	74.2019	112.438	74.8359	90.9597	102.409	92.4747	83.8817	87.8489	100.189	89.2699	90.1211	83.8658	82.205	76.5406	72.1432	137.548
118516670	5.8S ribosomal RNA	102.195	109.307	68.2608	96.2558	77.4369	74.2019	112.438	74.8359	90.9597	102.409	92.4747	83.8817	87.8489	100.189	89.2699	90.1211	83.8658	82.205	76.5406	72.1432	137.548
118516671	5.8S ribosomal RNA	102.195	109.307	68.2608	96.2558	77.4369	74.2019	112.438	74.8359	90.9597	102.409	92.4747	83.8817	87.8489	100.189	89.2699	90.1211	83.8658	82.205	76.5406	72.1432	137.548
118516672	5.8S ribosomal RNA	102.195	109.307	68.2608	96.2558	77.4369	74.2019	112.438	74.8359	90.9597	102.409	92.4747	83.8817	87.8489	100.189	89.2699	90.1211	83.8658	82.205	76.5406	72.1432	137.548
118516673	5.8S ribosomal RNA	102.195	109.307	68.2608	96.2558	77.4369	74.2019	112.438	74.8359	90.9597	102.409	92.4747	83.8817	87.8489	100.189	89.2699	90.1211	83.8658	82.205	76.5406	72.1432	137.548
118516675	5.8S ribosomal RNA	102.195	109.307	68.2608	96.2558	77.4369	74.2019	112.438	74.8359	90.9597	102.409	92.4747	83.8817	87.8489	100.189	89.2699	90.1211	83.8658	82.205	76.5406	72.1432	137.548
118516685	5.8S ribosomal RNA	102.195	109.307	68.2608	96.2558	77.4369	74.2019	112.438	74.8359	90.9597	102.409	92.4747	83.8817	87.8489	100.189	89.2699	90.1211	83.8658	82.205	76.5406	72.1432	137.548
118516689	5.8S ribosomal RNA	7.64351	22.6328	23.3817	13.0211	11.0258	0	13.1289	9.98747	25.9878	26.7546	34.6297	14.769	14.8822	18.4498	16.3924	28.4028	16.4179	24.1828	22.0601	25.461	31.336
118516701	5.8S ribosomal RNA	102.195	109.307	68.2608	96.2558	77.4369	74.2019	112.438	74.8359	90.9597	102.409	92.4747	83.8817	87.8489	100.189	89.2699	90.1211	83.8658	82.205	76.5406	72.1432	137.548
118516703	5.8S ribosomal RNA	102.195	109.307	68.2608	96.2558	77.4369	74.2019	112.438	74.8359	90.9597	102.409	92.4747	83.8817	87.8489	100.189	89.2699	90.1211	83.8658	82.205	76.5406	72.1432	137.548
118516711	5.8S ribosomal RNA	102.195	109.307	68.2608	96.2558	77.4369	74.2019	112.438	74.8359	90.9597	102.409	92.4747	83.8817	87.8489	100.189	89.2699	90.1211	83.8658	82.205	76.5406	72.1432	137.548
118516717	5.8S ribosomal RNA	102.195	109.307	68.2608	96.2558	77.4369	74.2019	112.438	74.8359	90.9597	102.409	92.4747	83.8817	87.8489	100.189	89.2699	90.1211	83.8658	82.205	76.5406	72.1432	137.548
118516719	5.8S ribosomal RNA	102.195	109.307	68.2608	96.2558	77.4369	74.2019	112.438	74.8359	90.9597	102.409	92.4747	83.8817	87.8489	100.189	89.2699	90.1211	83.8658	82.205	76.5406	72.1432	137.548
118516721	5.8S ribosomal RNA	102.195	109.307	68.2608	96.2558	77.4369	74.2019	112.438	74.8359	90.9597	102.409	92.4747	83.8817	87.8489	100.189	89.2699	90.1211	83.8658	82.205	76.5406	72.1432	137.548
118516724	5.8S ribosomal RNA	102.195	109.307	68.2608	96.2558	77.4369	74.2019	112.438	74.8359	90.9597	102.409	92.4747	83.8817	87.8489	100.189	89.2699	90.1211	83.8658	82.205	76.5406	72.1432	137.548
118516730	5.8S ribosomal RNA	102.195	109.307	68.2608	96.2558	77.4369	74.2019	112.438	74.8359	90.9597	102.409	92.4747	83.8817	87.8489	100.189	89.2699	90.1211	83.8658	82.205	76.5406	72.1432	137.548
118516731	5.8S ribosomal RNA	102.195	109.307	68.2608	96.2558	77.4369	74.2019	112.438	74.8359	90.9597	102.409	92.4747	83.8817	87.8489	100.189	89.2699	90.1211	83.8658	82.205	76.5406	72.1432	137.548
118516732	5.8S ribosomal RNA	102.195	109.307	68.2608	96.2558	77.4369	74.2019	112.438	74.8359	90.9597	102.409	92.4747	83.8817	87.8489	100.189	89.2699	90.1211	83.8658	82.205	76.5406	72.1432	137.548
118516734	5.8S ribosomal RNA	102.195	109.307	68.2608	96.2558	77.4369	74.2019	112.438	74.8359	90.9597	102.409	92.4747	83.8817	87.8489	100.189	89.2699	90.1211	83.8658	82.205	76.5406	72.1432	137.548
118516736	5.8S ribosomal RNA	102.195	109.307	68.2608	96.2558	77.4369	74.2019	112.438	74.8359	90.9597	102.409	92.4747	83.8817	87.8489	100.189	89.2699	90.1211	83.8658	82.205	76.5406	72.1432	137.548
118516741	5.8S ribosomal RNA	102.195	109.307	68.2608	96.2558	77.4369	74.2019	112.438	74.8359	90.9597	102.409	92.4747	83.8817	87.8489	100.189	89.2699	90.1211	83.8658	82.205	76.5406	72.1432	137.548
118516742	5.8S ribosomal RNA	102.195	109.307	68.2608	96.2558	77.4369	74.2019	112.438	74.8359	90.9597	102.409	92.4747	83.8817	87.8489	100.189	89.2699	90.1211	83.8658	82.205	76.5406	72.1432	137.548
118516743	5.8S ribosomal RNA	102.195	109.307	68.2608	96.2558	77.4369	74.2019	112.438	74.8359	90.9597	102.409	92.4747	83.8817	87.8489	100.189	89.2699	90.1211	83.8658	82.205	76.5406	72.1432	137.548
118516744	5.8S ribosomal RNA	102.195	109.307	68.2608	96.2558	77.4369	74.2019	112.438	74.8359	90.9597	102.409	92.4747	83.8817	87.8489	100.189	89.2699	90.1211	83.8658	82.205	76.5406	72.1432	137.548
118516747	5.8S ribosomal RNA	102.195	109.307	68.2608	96.2558	77.4369	74.2019	112.438	74.8359	90.9597	102.409	92.4747	83.8817	87.8489	100.189	89.2699	90.1211	83.8658	82.205	76.5406	72.1432	137.548
118516748	5.8S ribosomal RNA	102.195	109.307	68.2608	96.2558	77.4369	74.2019	112.438	74.8359	90.9597	102.409	92.4747	83.8817	87.8489	100.189	89.2699	90.1211	83.8658	82.205	76.5406	72.1432	137.548
118516750	5.8S ribosomal RNA	102.195	109.307	68.2608	96.2558	77.4369	74.2019	112.438	74.8359	90.9597	102.409	92.4747	83.8817	87.8489	100.189	89.2699	90.1211	83.8658	82.205	76.5406	72.1432	137.548
118516754	5.8S ribosomal RNA	102.195	109.307	68.2608	96.2558	77.4369	74.2019	112.438	74.8359	90.9597	102.409	92.4747	83.8817	87.8489	100.189	89.2699	90.1211	83.8658	82.205	76.5406	72.1432	137.548
118516755	5.8S ribosomal RNA	102.195	109.307	68.2608	96.2558	77.4369	74.2019	112.438	74.8359	90.9597	102.409	92.4747	83.8817	87.8489	100.189	89.2699	90.1211	83.8658	82.205	76.5406	72.1432	137.548
118516757	5.8S ribosomal RNA	102.195	109.307	68.2608	96.2558	77.4369	74.2019	112.438	74.8359	90.9597	102.409	92.4747	83.8817	87.8489	100.189	89.2699	90.1211	83.8658	82.205	76.5406	72.1432	137.548
118516758	5.8S ribosomal RNA	102.195	109.307	68.2608	96.2558	77.4369	74.2019	112.438	74.8359	90.9597	102.409	92.4747	83.8817	87.8489	100.189	89.2699	90.1211	83.8658	82.205	76.5406	72.1432	137.548
118516761	5.8S ribosomal RNA	102.195	109.307	68.2608	96.2558	77.4369	74.2019	112.438	74.8359	90.9597	102.409	92.4747	83.8817	87.8489	100.189	89.2699	90.1211	83.8658	82.205	76.5406	72.1432	137.548
118516765	5.8S ribosomal RNA	102.195	109.307	68.2608	96.2558	77.4369	74.2019	112.438	74.8359	90.9597	102.409	92.4747	83.8817	87.8489	100.189	89.2699	90.1211	83.8658	82.205	76.5406	72.1432	137.548
118516768	5.8S ribosomal RNA	102.195	109.307	68.2608	96.2558	77.4369	74.2019	112.438	74.8359	90.9597	102.409	92.4747	83.8817	87.8489	100.189	89.2699	90.1211	83.8658	82.205	76.5406	72.1432	137.548
118516769	5.8S ribosomal RNA	102.195	109.307	68.2608	96.2558	77.4369	74.2019	112.438	74.8359	90.9597	102.409	92.4747	83.8817	87.8489	100.189	89.2699	90.1211	83.8658	82.205	76.5406	72.1432	137.548
118516770	5.8S ribosomal RNA	102.195	109.307	68.2608	96.2558	77.4369	74.2019	112.438	74.8359	90.9597	102.409	92.4747	83.8817	87.8489	100.189	89.2699	90.1211	83.8658	82.205	76.5406	72.1432	137.548
118516771	5.8S ribosomal RNA	102.195	109.307	68.2608	96.2558	77.4369	74.2019	112.438	74.8359	90.9597	102.409	92.4747	83.8817	87.8489	100.189	89.2699	90.1211	83.8658	82.205	76.5406	72.1432	137.548
118516772	5.8S ribosomal RNA	102.195	109.307	68.2608	96.2558	77.4369	74.2019	112.438	74.8359	90.9597	102.409	92.4747	83.8817	87.8489	100.189	89.2699	90.1211	83.8658	82.205	76.5406	72.1432	137.548
118516778	5.8S ribosomal RNA	102.195	109.307	68.2608	96.2558	77.4369	74.2019	112.438	74.8359	90.9597	102.409	92.4747	83.8817	87.8489	100.189	89.2699	90.1211	83.8658	82.205	76.5406	72.1432	137.548
118516779	5.8S ribosomal RNA	102.195	109.307	68.2608	96.2558	77.4369	74.2019	112.438	74.8359	90.9597	102.409	92.4747	83.8817	87.8489	100.189	89.2699	90.1211	83.8658	82.205	76.5406	72.1432	137.548
118516780	5.8S ribosomal RNA	102.195	109.307	68.2608	96.2558	77.4369	74.2019	112.438	74.8359	90.9597	102.409	92.4747	83.8817	87.8489	100.189	89.2699	90.1211	83.8658	82.205	76.5406	72.1432	137.548
118516781	5.8S ribosomal RNA	102.195	109.307	68.2608	96.2558	77.4369	74.2019	112.438	74.8359	90.9597	102.409	92.4747	83.8817	87.8489	100.189	89.2699	90.1211	83.8658	82.205	76.5406	72.1432	137.548
118516792	5.8S ribosomal RNA	102.195	109.307	68.2608	96.2558	77.4369	74.2019	112.438	74.8359	90.9597	102.409	92.4747	83.8817	87.8489	100.189	89.2699	90.1211	83.8658	82.205	76.5406	72.1432	137.548
118516794	5.8S ribosomal RNA	102.195	109.307	68.2608	96.2558	77.4369	74.2019	112.438	74.8359	90.9597	102.409	92.4747	83.8817	87.8489	100.189	89.2699	90.1211	83.8658	82.205	76.5406	72.1432	137.548
118516795	5.8S ribosomal RNA	102.195	109.307	68.2608	96.2558	77.4369	74.2019	112.438	74.8359	90.9597	102.409	92.4747	83.8817	87.8489	100.189	89.2699	90.1211	83.8658	82.205	76.5406	72.1432	137.548
118516801	5.8S ribosomal RNA	102.195	109.307	68.2608	96.2558	77.4369	74.2019	112.438	74.8359	90.9597	102.409	92.4747	83.8817	87.8489	100.189	89.2699	90.1211	83.8658	82.205	76.5406	72.1432	137.548
118516802	5.8S ribosomal RNA	102.195	109.307	68.2608	96.2558	77.4369	74.2019	112.438	74.8359	90.9597	102.409	92.4747	83.8817	87.8489	100.189	89.2699	90.1211	83.8658	82.205	76.5406	72.1432	137.548
118516803	5.8S ribosomal RNA	102.195	109.307	68.2608	96.2558	77.4369	74.2019	112.438	74.8359	90.9597	102.409	92.4747	83.8817	87.8489	100.189	89.2699	90.1211	83.8658	82.205	76.5406	72.1432	137.548
118516804	5.8S ribosomal RNA	102.195	109.307	68.2608	96.2558	77.4369	74.2019	112.438	74.8359	90.9597	102.409	92.4747	83.8817	87.8489	100.189	89.2699	90.1211	83.8658	82.205	76.5406	72.1432	137.548
118516807	5.8S ribosomal RNA	102.195	109.307	68.2608	96.2558	77.4369	74.2019	112.438	74.8359	90.9597	102.409	92.4747	83.8817	87.8489	100.189	89.2699	90.1211	83.8658	82.205	76.5406	72.1432	137.548
118516809	5.8S ribosomal RNA	102.195	109.307	68.2608	96.2558	77.4369	74.2019	112.438	74.8359	90.9597	102.409	92.4747	83.8817	87.8489	100.189	89.2699	90.1211	83.8658	82.205	76.5406	72.1432	137.548
118516812	5.8S ribosomal RNA	102.195	109.307	68.2608	96.2558	77.4369	74.2019	112.438	74.8359	90.9597	102.409	92.4747	83.8817	87.8489	100.189	89.2699	90.1211	83.8658	82.205	76.5406	72.1432	137.548
118516816	5.8S ribosomal RNA	102.195	109.307	68.2608	96.2558	77.4369	74.2019	112.438	74.8359	90.9597	102.409	92.4747	83.8817	87.8489	100.189	89.2699	90.1211	83.8658	82.205	76.5406	72.1432	137.548
118516817	5.8S ribosomal RNA	102.195	109.307	68.2608	96.2558	77.4369	74.2019	112.438	74.8359	90.9597	102.409	92.4747	83.8817	87.8489	100.189	89.2699	90.1211	83.8658	82.205	76.5406	72.1432	137.548
118516818	5.8S ribosomal RNA	0	26.8184	0	0	0	0	0	0	6.3247	0	0	0	57.9602	0	0	19.7961	41.2248	0	14.683	40.2622	31.5786
118516821	5.8S ribosomal RNA	102.195	109.307	68.2608	96.2558	77.4369	74.2019	112.438	74.8359	90.9597	102.409	92.4747	83.8817	87.8489	100.189	89.2699	90.1211	83.8658	82.205	76.5406	72.1432	137.548
118516823	5.8S ribosomal RNA	102.195	109.307	68.2608	96.2558	77.4369	74.2019	112.438	74.8359	90.9597	102.409	92.4747	83.8817	87.8489	100.189	89.2699	90.1211	83.8658	82.205	76.5406	72.1432	137.548
118516825	5.8S ribosomal RNA	102.195	109.307	68.2608	96.2558	77.4369	74.2019	112.438	74.8359	90.9597	102.409	92.4747	83.8817	87.8489	100.189	89.2699	90.1211	83.8658	82.205	76.5406	72.1432	137.548
118516826	5.8S ribosomal RNA	102.195	109.307	68.2608	96.2558	77.4369	74.2019	112.438	74.8359	90.9597	102.409	92.4747	83.8817	87.8489	100.189	89.2699	90.1211	83.8658	82.205	76.5406	72.1432	137.548
118516827	5.8S ribosomal RNA	102.195	109.307	68.2608	96.2558	77.4369	74.2019	112.438	74.8359	90.9597	102.409	92.4747	83.8817	87.8489	100.189	89.2699	90.1211	83.8658	82.205	76.5406	72.1432	137.548
118516828	5.8S ribosomal RNA	12.1334	4.01762	9.94865	10.4191	3.92178	4.02579	9.33231	0	13.9177	14.2763	4.63879	10.5028	15.9446	7.85107	4.39434	3.39987	3.52378	3.70932	7.93034	0	19.9584
118516829	5.8S ribosomal RNA	102.195	109.307	68.2608	96.2558	77.4369	74.2019	112.438	74.8359	90.9597	102.409	92.4747	83.8817	87.8489	100.189	89.2699	90.1211	83.8658	82.205	76.5406	72.1432	137.548
118516835	5.8S ribosomal RNA	102.195	109.307	68.2608	96.2558	77.4369	74.2019	112.438	74.8359	90.9597	102.409	92.4747	83.8817	87.8489	100.189	89.2699	90.1211	83.8658	82.205	76.5406	72.1432	137.548
118516836	5.8S ribosomal RNA	102.195	109.307	68.2608	96.2558	77.4369	74.2019	112.438	74.8359	90.9597	102.409	92.4747	83.8817	87.8489	100.189	89.2699	90.1211	83.8658	82.205	76.5406	72.1432	137.548
118516837	5.8S ribosomal RNA	102.195	109.307	68.2608	96.2558	77.4369	74.2019	112.438	74.8359	90.9597	102.409	92.4747	83.8817	87.8489	100.189	89.2699	90.1211	83.8658	82.205	76.5406	72.1432	137.548
118516838	5.8S ribosomal RNA	102.195	109.307	68.2608	96.2558	77.4369	74.2019	112.438	74.8359	90.9597	102.409	92.4747	83.8817	87.8489	100.189	89.2699	90.1211	83.8658	82.205	76.5406	72.1432	137.548
118516840	5.8S ribosomal RNA	102.195	109.307	68.2608	96.2558	77.4369	74.2019	112.438	74.8359	90.9597	102.409	92.4747	83.8817	87.8489	100.189	89.2699	90.1211	83.8658	82.205	76.5406	72.1432	137.548
118516859	5.8S ribosomal RNA	102.195	109.307	68.2608	96.2558	77.4369	74.2019	112.438	74.8359	90.9597	102.409	92.4747	83.8817	87.8489	100.189	89.2699	90.1211	83.8658	82.205	76.5406	72.1432	137.548
118516861	5.8S ribosomal RNA	102.195	109.307	68.2608	96.2558	77.4369	74.2019	112.438	74.8359	90.9597	102.409	92.4747	83.8817	87.8489	100.189	89.2699	90.1211	83.8658	82.205	76.5406	72.1432	137.548
118516867	5.8S ribosomal RNA	102.195	109.307	68.2608	96.2558	77.4369	74.2019	112.438	74.8359	90.9597	102.409	92.4747	83.8817	87.8489	100.189	89.2699	90.1211	83.8658	82.205	76.5406	72.1432	137.548
118516868	5.8S ribosomal RNA	102.195	109.307	68.2608	96.2558	77.4369	74.2019	112.438	74.8359	90.9597	102.409	92.4747	83.8817	87.8489	100.189	89.2699	90.1211	83.8658	82.205	76.5406	72.1432	137.548
118516869	5.8S ribosomal RNA	102.195	109.307	68.2608	96.2558	77.4369	74.2019	112.438	74.8359	90.9597	102.409	92.4747	83.8817	87.8489	100.189	89.2699	90.1211	83.8658	82.205	76.5406	72.1432	137.548
118516870	5.8S ribosomal RNA	102.195	109.307	68.2608	96.2558	77.4369	74.2019	112.438	74.8359	90.9597	102.409	92.4747	83.8817	87.8489	100.189	89.2699	90.1211	83.8658	82.205	76.5406	72.1432	137.548
118516872	5.8S ribosomal RNA	102.195	109.307	68.2608	96.2558	77.4369	74.2019	112.438	74.8359	90.9597	102.409	92.4747	83.8817	87.8489	100.189	89.2699	90.1211	83.8658	82.205	76.5406	72.1432	137.548
118516875	5.8S ribosomal RNA	102.195	109.307	68.2608	96.2558	77.4369	74.2019	112.438	74.8359	90.9597	102.409	92.4747	83.8817	87.8489	100.189	89.2699	90.1211	83.8658	82.205	76.5406	72.1432	137.548
118516877	5.8S ribosomal RNA	102.195	109.307	68.2608	96.2558	77.4369	74.2019	112.438	74.8359	90.9597	102.409	92.4747	83.8817	87.8489	100.189	89.2699	90.1211	83.8658	82.205	76.5406	72.1432	137.548
118516880	5.8S ribosomal RNA	35.4719	24.569	18.3435	44.7561	24.3657	26.4622	39.0567	32.5032	14.2696	38.0026	26.436	26.5498	5.16246	41.6693	22.1344	31.5987	24.53	36.5387	46.5665	15.4777	45.2441
118516881	5.8S ribosomal RNA	102.195	109.307	68.2608	96.2558	77.4369	74.2019	112.438	74.8359	90.9597	102.409	92.4747	83.8817	87.8489	100.189	89.2699	90.1211	83.8658	82.205	76.5406	72.1432	137.548
118516885	5.8S ribosomal RNA	102.195	109.307	68.2608	96.2558	77.4369	74.2019	112.438	74.8359	90.9597	102.409	92.4747	83.8817	87.8489	100.189	89.2699	90.1211	83.8658	82.205	76.5406	72.1432	137.548
118516886	5.8S ribosomal RNA	102.195	109.307	68.2608	96.2558	77.4369	74.2019	112.438	74.8359	90.9597	102.409	92.4747	83.8817	87.8489	100.189	89.2699	90.1211	83.8658	82.205	76.5406	72.1432	137.548
118516887	5.8S ribosomal RNA	102.195	109.307	68.2608	96.2558	77.4369	74.2019	112.438	74.8359	90.9597	102.409	92.4747	83.8817	87.8489	100.189	89.2699	90.1211	83.8658	82.205	76.5406	72.1432	137.548
118516891	5.8S ribosomal RNA	102.195	109.307	68.2608	96.2558	77.4369	74.2019	112.438	74.8359	90.9597	102.409	92.4747	83.8817	87.8489	100.189	89.2699	90.1211	83.8658	82.205	76.5406	72.1432	137.548
118516892	5.8S ribosomal RNA	102.195	109.307	68.2608	96.2558	77.4369	74.2019	112.438	74.8359	90.9597	102.409	92.4747	83.8817	87.8489	100.189	89.2699	90.1211	83.8658	82.205	76.5406	72.1432	137.548
118516908	5.8S ribosomal RNA	102.195	109.307	68.2608	96.2558	77.4369	74.2019	112.438	74.8359	90.9597	102.409	92.4747	83.8817	87.8489	100.189	89.2699	90.1211	83.8658	82.205	76.5406	72.1432	137.548
118517030	5.8S ribosomal RNA	102.195	109.307	68.2608	96.2558	77.4369	74.2019	112.438	74.8359	90.9597	102.409	92.4747	83.8817	87.8489	100.189	89.2699	90.1211	83.8658	82.205	76.5406	72.1432	137.548
118517035	5.8S ribosomal RNA	0	9.52335	3.87935	8.10924	3.04123	6.23126	0	0	3.54483	7.29411	10.5897	12.0988	6.272	3.04741	0	12.5422	5.10656	0	5.74186	3.28813	18.6885
118517037	5.8S ribosomal RNA	102.195	109.307	68.2608	96.2558	77.4369	74.2019	112.438	74.8359	90.9597	102.409	92.4747	83.8817	87.8489	100.189	89.2699	90.1211	83.8658	82.205	76.5406	72.1432	137.548
118517038	5.8S ribosomal RNA	2.42412	11.5769	2.84826	7.90954	2.32866	0	10.6231	6.24905	5.21217	0	2.57488	5.90626	4.83178	2.24412	0	1.96085	7.39975	4.8762	5.07932	4.40301	30.3654
118517039	5.8S ribosomal RNA	102.195	109.307	68.2608	96.2558	77.4369	74.2019	112.438	74.8359	90.9597	102.409	92.4747	83.8817	87.8489	100.189	89.2699	90.1211	83.8658	82.205	76.5406	72.1432	137.548
118517046	5.8S ribosomal RNA	102.195	109.307	68.2608	96.2558	77.4369	74.2019	112.438	74.8359	90.9597	102.409	92.4747	83.8817	87.8489	100.189	89.2699	90.1211	83.8658	82.205	76.5406	72.1432	137.548
118517047	5.8S ribosomal RNA	102.195	109.307	68.2608	96.2558	77.4369	74.2019	112.438	74.8359	90.9597	102.409	92.4747	83.8817	87.8489	100.189	89.2699	90.1211	83.8658	82.205	76.5406	72.1432	137.548
118517048	5.8S ribosomal RNA	102.195	109.307	68.2608	96.2558	77.4369	74.2019	112.438	74.8359	90.9597	102.409	92.4747	83.8817	87.8489	100.189	89.2699	90.1211	83.8658	82.205	76.5406	72.1432	137.548
118517312	5.8S ribosomal RNA	102.195	109.307	68.2608	96.2558	77.4369	74.2019	112.438	74.8359	90.9597	102.409	92.4747	83.8817	87.8489	100.189	89.2699	90.1211	83.8658	82.205	76.5406	72.1432	137.548
118517317	5.8S ribosomal RNA	102.195	109.307	68.2608	96.2558	77.4369	74.2019	112.438	74.8359	90.9597	102.409	92.4747	83.8817	87.8489	100.189	89.2699	90.1211	83.8658	82.205	76.5406	72.1432	137.548
118505084	50S ribosomal protein L1	59.2985	55.9239	60.5198	62.7214	51.9767	61.3311	49.0536	48.2334	49.788	47.8706	53.609	46.3819	54.7854	52.2217	50.7631	49.6866	46.1196	48.8311	54.5205	50.8663	59.7051
118503183	5'-3' exoribonuclease 1	18.2813	18.1247	28.0651	18.7233	27.6332	22.0594	30.2611	31.8928	20.8525	25.4893	26.7815	27.4152	28.6695	24.5676	24.9878	23.7121	22.9478	24.8364	30.0735	25.3427	21.921
118502839	5'-3' exoribonuclease 2 homolog	10.3719	10.216	20.3571	8.95899	20.3292	12.347	22.6189	25.0009	12.7029	18.8266	20.3269	20.7805	21.399	24.9086	23.0844	21.1513	25.7037	20.6077	31.4969	27.9843	21.4903
118507993	54S ribosomal protein L12, mitochondrial	194.293	208.735	192.483	186.348	161.95	190.893	121.48	126.763	133.304	116.093	142.299	139.334	130.385	131.118	141.681	133.254	122.154	109.433	147.406	117.824	143.183
118508292	5-aminolevulinate synthase, erythroid-specific, mitochondrial, transcript variant X1	0	0.270192	0	0.231951	0.209425	0	0.300888	0	0.927352	0.337345	0.803512	0.304135	0.251782	0	0.279381	1.07913	0.213533	0.457846	0.26599	1.13958	0.227716
118508292	5-aminolevulinate synthase, erythroid-specific, mitochondrial, transcript variant X2	0.408658	0.101192	0	0.420732	0.177229	0.516644	0.455994	0.124453	0.452622	0.358223	1.26962	1.31433	0.385722	0.888535	1.06647	0.77423	1.02033	1.08086	0.200103	1.63808	0.34508
118508292	5-aminolevulinate synthase, erythroid-specific, mitochondrial, transcript variant X3	38.0132	42.5563	63.9973	47.6746	59.0661	44.7528	57.7107	64.472	39.0113	44.4618	45.2916	49.1648	41.7897	40.964	41.6091	36.1331	38.2237	29.0828	61.9863	52.6417	41.0331
118508292	5-aminolevulinate synthase, erythroid-specific, mitochondrial, transcript variant X4	1.62662	0.423548	0.535491	1.49262	0.895085	3.49988	0.472998	1.92483	3.26564	1.10959	0.790223	0.919879	2.31279	0.822839	3.81827	1.92418	3.17957	2.41331	0.826686	1.70612	3.22485
118505002	5'-AMP-activated protein kinase catalytic subunit alpha-2	101.878	96.4738	110.324	96.924	109.649	92.3384	115.164	125.133	127.256	108.328	103.146	111.113	92.5588	96.8454	101.112	96.8032	104.389	94.6453	98.5276	109.805	99.0822
118513660	5'-AMP-activated protein kinase subunit beta-2	143.973	127.686	157.197	127.868	144.027	148.397	135.318	151.269	146.07	130.8	130.694	140.668	121.962	118.155	125.978	134.517	136.862	128.274	138.487	136.595	121.61
118505416	5-demethoxyubiquinone hydroxylase, mitochondrial, transcript variant X1	7.99324	5.53808	0	13.1631	10.8194	0	1.33749	4.21362	1.73147	8.71784	3.51175	0.751696	3.72526	0.972783	12.3295	15.7219	0.531992	2.29021	2.18739	19.2499	0.531625
118505416	5-demethoxyubiquinone hydroxylase, mitochondrial, transcript variant X2	0.539761	0.619694	0	1.47943	2.12458	0	0	0.863548	0	0.627034	0	0	0.545332	0	3.60548	3.27636	0	0	0	2.22018	0
118505416	5-demethoxyubiquinone hydroxylase, mitochondrial, transcript variant X3	56.5816	53.2991	56.6925	68.1831	63.8593	81.1109	51.8075	53.3708	56.7695	60.6928	70.4086	76.1756	78.7676	72.1311	62.4911	56.7994	75.4491	66.6978	82.9061	55.1598	82.1685
118505416	5-demethoxyubiquinone hydroxylase, mitochondrial, transcript variant X4	2.95307	9.86569	10.9159	10.3847	6.25972	13.6805	7.22103	8.74086	9.49892	11.8887	9.61647	8.68645	6.20398	9.0939	6.24926	9.05545	4.84229	8.45925	4.48869	4.9106	6.33552
118514401	5-demethoxyubiquinone hydroxylase, mitochondrial-like	0	0.109186	0	0.0906505	0	0	0.374439	0.138781	0.122235	0.126591	0	0	0.425541	0.106498	0	0	0.192382	0.506112	0	0	0
118511122	5'-deoxynucleotidase HDDC2	75.9787	78.4369	70.6561	72.24	64.5604	80.2355	62.4866	65.1373	66.2863	60.0813	61.4471	60.3255	66.11	61.0671	64.7687	66.1142	61.5024	60.3904	64.6604	58.6451	65.1171
118509921	5-formyltetrahydrofolate cyclo-ligase, transcript variant X1	0	0	0	0.522093	0.445856	0	1.21243	0	1.02277	0.652776	1.11999	1.11919	0	0.597945	0	0	0	0	0.683867	0.370681	1.43255
118509921	5-formyltetrahydrofolate cyclo-ligase, transcript variant X2	4.58778	4.58134	3.36098	2.70207	4.96224	3.182	2.58601	3.31912	1.68651	1.65831	2.41132	3.3138	1.76841	1.73527	1.66307	2.64082	1.94503	1.85945	1.85711	1.29926	1.83366
118509921	5-formyltetrahydrofolate cyclo-ligase, transcript variant X3	0	0	0	0.232646	0	0	0	0	0	0	0.257369	0.282476	0	0	0	0.174367	0	0.20261	0	0.469169	0
118509921	5-formyltetrahydrofolate cyclo-ligase, transcript variant X4	4.1098	4.19888	3.81405	4.01532	2.16947	4.58331	3.63796	3.6421	6.59206	3.20464	1.49236	1.70918	2.07002	1.57682	3.72351	1.39197	2.11913	1.96731	1.35185	3.4551	2.65305
118509921	5-formyltetrahydrofolate cyclo-ligase, transcript variant X5	0	0.210839	0	0	0	0	0	0	0	0	0	0	0	0	0	5.54518e-08	0.170625	0	0	0	0
118509921	5-formyltetrahydrofolate cyclo-ligase, transcript variant X6	0	1.65239e-09	0	0	0	0	0	0	0	0	0	0	0	0	0	0.138173	0	0	0	0.144831	0
118510695	5-hydroxyisourate hydrolase	15.4059	17.5875	13.5244	24.9625	18.5118	23.8407	11.2096	11.4165	15.6959	19.5762	17.7267	18.6705	22.5204	21.3509	20.0465	23.1903	21.9209	19.5547	18.4581	19.5935	20.5493
118504197	5-hydroxytryptamine receptor 1A	19.0516	22.8334	29.6227	21.7829	28.465	24.6235	21.6027	21.0526	18.1794	19.5991	19.7543	21.5826	20.5486	20.06	20.2025	17.3742	21.569	22.3091	22.3698	18.4944	17.2088
118506365	5-hydroxytryptamine receptor 1-like, transcript variant X1	11.8259	16.8158	38.9408	12.8599	33.6116	22.4368	34.7581	37.3422	19.6059	28.2212	24.2269	24.6835	22.4203	25.887	23.9504	25.3748	37.2566	29.8706	32.6031	26.337	20.4815
118506366	5-hydroxytryptamine receptor 1-like, transcript variant X1	1.67531e-07	7.6021e-07	2.57206e-07	1.12876e-06	1.35211e-07	5.52318e-05	0	2.73311e-05	1.45505e-07	3.79167e-06	5.09044e-06	0.00116272	1.05985e-06	1.22352e-07	6.25128e-09	2.28738e-06	3.42763e-07	1.8748e-06	2.91017e-06	3.39513e-08	0.000854646
118506365	5-hydroxytryptamine receptor 1-like, transcript variant X2	0.337132	0.647078	0.745044	1.0647	1.20226	0.523859	1.68223	2.47673	1.34548	2.14087	1.21453	1.68915	2.65098	1.29126	2.35505	1.65905	1.27811	3.93079	3.54244	2.25612	1.44841
118506366	5-hydroxytryptamine receptor 1-like, transcript variant X2	19.143	14.6017	31.8241	19.7609	27.9457	28.1398	28.0044	35.7743	17.2354	25.2583	24.2544	22.4471	25.8392	20.1766	19.0609	21.0606	20.4878	22.6228	23.1595	22.0299	23.7403
118506365	5-hydroxytryptamine receptor 1-like, transcript variant X3	0	4.12078e-07	1.90568	0	2.51842e-09	2.18552	1.36745	1.2426	1.47924	0	0	0	1.37022	1.29826	1.68794	0.730713	0.255986	0.00724111	0.00599788	0	1.05305
118506366	5-hydroxytryptamine receptor 1-like, transcript variant X3	17.4505	23.1702	29.5278	14.4107	30.1976	22.8998	25.297	24.6374	22.9414	22.6882	23.8864	22.0635	20.5189	20.1328	20.7697	17.9913	24.1252	25.404	22.9495	24.5722	15.8947
118506365	5-hydroxytryptamine receptor 1-like, transcript variant X4	6.30173	0.000616199	6.50346e-07	3.98175	4.1047	1.12377	1.89685	1.9343	3.639	1.871	1.08911e-05	4.96393	4.26747	2.96784	4.4948	9.01199e-06	3.47241e-05	3.24117	4.51377	5.62349	3.70598
118506366	5-hydroxytryptamine receptor 1-like, transcript variant X4	10.0913	13.3039	13.2362	12.5308	18.2131	5.84141	11.5955	12.0411	11.548	9.13896	11.3572	14.0882	5.60771	9.89292	12.2901	6.30387	11.5515	7.62649	14.4587	10.5416	4.31763
118506365	5-hydroxytryptamine receptor 1-like, transcript variant X5	9.4399e-07	4.0825e-07	6.2589e-08	1.1719	5.16955e-07	0	1.13012	1.32001	7.8008e-10	2.69889e-09	2.74971	1.08608e-09	0.820201	1.56081	1.09661	0.96678	1.09934	2.2913	2.0673	2.60576	6.46053e-06
118506365	5-hydroxytryptamine receptor 1-like, transcript variant X6	1.01078	2.5663	1.40413	0	1.95218	0.830745	3.05227	0.932083	0	2.35202	1.68821	1.06022	0.632932	0.910382	2.606	1.64654	2.2204	0.936069	2.18791e-06	2.9875	0.0611401
118507349	5-hydroxytryptamine receptor-like, transcript variant X1	2.76624e-06	0	1.54305	0	0	0	2.58074e-06	0	0	0	0	0	0	0	0	0	0.0115575	0	0	0	0
118511366	5-hydroxytryptamine receptor-like, transcript variant X1	3.28061	8.58928	7.11377	3.27401	6.42565	6.67591	4.23073	3.07751	1.10617	2.42654	5.93821	10.0863	4.17925	4.66731	5.01854	1.13816	5.76193	9.65108	1.33708	0.255427	8.46422
118507349	5-hydroxytryptamine receptor-like, transcript variant X2	0.463612	0.256205	1.10214	0.636283	0.764577	1.10556	1.3056	1.62708	1.20531	1.17435	1.33701	2.82805	2.05509	2.53455	0.983845	2.0063	2.50696	3.52586	1.32267	3.21695	2.33208
118511366	5-hydroxytryptamine receptor-like, transcript variant X2	5.86597	1.59165	14.1677	9.6053	13.3288	9.30923	16.7132	12.7355	8.02843	16.1417	9.99532	13.0324	8.32488	11.8883	7.85685	12.6301	14.9412	11.3732	16.8709	15.2681	5.02026
118507349	5-hydroxytryptamine receptor-like, transcript variant X3	0	1.15157	0.0541769	0	0.925219	0.243726	1.2333	1.46404	1.42629	1.03004	1.08053	1.29959	0	0.652319	0.612857	0.498437	1.71926	0	0.54485	1.36396e-09	0
118511366	5-hydroxytryptamine receptor-like, transcript variant X3	2.1632	0.27826	0.0238812	0.581449	8.45861	0.00632961	2.12935	4.54437	2.1861	2.39826	1.48138	0.0431757	4.08424	0.0666062	2.48292	1.12096	0.0099914	1.39099	2.60085	4.93432	0.265664
118507349	5-hydroxytryptamine receptor-like, transcript variant X4	1.48887	0.652332	1.0418	0.941162	1.73334	1.07967	0.641286	2.07569	0	1.13373	0.676498	1.37161	0.971173	0	1.59855	0	0.994994	0.609149	1.40372	0.000706487	2.6324e-09
118511679	5-methylcytosine rRNA methyltransferase NSUN4	13.8387	15.1257	12.1337	13.4538	12.1136	14.0361	11.0253	12.2588	12.5711	14.2448	13.6303	12.6699	14.848	14.764	15.1315	13.7153	10.4059	16.3707	16.7014	14.2892	18.7358
118507619	5'-nucleotidase domain-containing protein 1	90.1235	80.9748	89.7106	76.2329	81.8977	79.0669	95.5661	93.6874	93.7733	79.8955	80.4499	75.7123	86.1909	85.1815	92.5205	100.752	95.6044	97.3051	80.7005	85.4836	83.7345
118505614	5-oxoprolinase	4.33953	5.02981	17.4629	4.26278	17.4073	7.83521	21.7946	20.2	8.74075	13.1246	12.3578	12.2413	15.6527	16.2703	15.3926	14.4461	19.8011	17.8997	23.2836	26.4011	16.5892
118514714	5S ribosomal RNA	1.43552	0	0	0.541074	0.618104	0	0	0	0	0.165702	0	0	0.653989	0	0.384069	0	0	0	0	0	0
118514715	5S ribosomal RNA	1.43552	1.26053	1.22545	0.541074	0.618104	0.751422	0.644725	0.520083	0.336589	0.165702	0.238278	0.569723	0.653989	0.729559	0.384069	0.266082	0.199033	0.279086	0.345328	0.216908	0.879658
118514716	5S ribosomal RNA	1.43552	1.26053	1.22545	0.541074	0.618104	0.751422	0.644725	0.520083	0.336589	0.165702	0.238278	0.569723	0.653989	0.729559	0.384069	0.266082	0.199033	0.279086	0.345328	0.216908	0.879658
118514717	5S ribosomal RNA	1.43552	1.26053	1.22545	0.541074	0.618104	0.751422	0.644725	0.520083	0.336589	0.165702	0.238278	0.569723	0.653989	0.729559	0.384069	0.266082	0.199033	0.279086	0.345328	0.216908	0.879658
118514718	5S ribosomal RNA	1.43552	1.26053	1.22545	0.541074	0.618104	0.751422	0.644725	0.520083	0.336589	0.165702	0.238278	0.569723	0.653989	0.729559	0.384069	0.266082	0.199033	0.279086	0.345328	0.216908	0.879658
118514719	5S ribosomal RNA	1.43552	1.26053	1.22545	0.541074	0.618104	0.751422	0.644725	0.520083	0.336589	0.165702	0.238278	0.569723	0.653989	0.729559	0.384069	0.266082	0.199033	0.279086	0.345328	0.216908	0.879658
118514720	5S ribosomal RNA	1.33144	1.54415	0	0.286769	0.188997	0.66761	1.1032	0	0	0.658666	0.458685	0.548358	0.649902	0	0.508891	0.204883	0	0	0.168161	0.208774	0.225779
118514721	5S ribosomal RNA	1.43552	1.26053	1.22545	0.541074	0.618104	0.751422	0.644725	0.520083	0.336589	0.165702	0.238278	0.569723	0.653989	0.729559	0.384069	0.266082	0.199033	0.279086	0.345328	0.216908	0.879658
118514722	5S ribosomal RNA	1.43552	1.26053	1.22545	0.541074	0.618104	0.751422	0.644725	0.520083	0.336589	0.165702	0.238278	0.569723	0.653989	0.729559	0.384069	0.266082	0.199033	0.279086	0.345328	0.216908	0.879658
118514723	5S ribosomal RNA	1.43552	1.26053	1.22545	0.541074	0.618104	0.751422	0.644725	0.520083	0.336589	0.165702	0.238278	0.569723	0.653989	0.729559	0.384069	0.266082	0.199033	0.279086	0.345328	0.216908	0.879658
118514724	5S ribosomal RNA	1.43552	1.26053	1.22545	0.541074	0.618104	0.751422	0.644725	0.520083	0.336589	0.165702	0.238278	0.569723	0.653989	0.729559	0.384069	0.266082	0.199033	0.279086	0.345328	0.216908	0.879658
118514725	5S ribosomal RNA	1.43552	1.26053	1.22545	0.541074	0.618104	0.751422	0.644725	0.520083	0.336589	0.165702	0.238278	0.569723	0.653989	0.729559	0.384069	0.266082	0.199033	0.279086	0.345328	0.216908	0.879658
118514726	5S ribosomal RNA	1.43552	1.26053	1.22545	0.541074	0.618104	0.751422	0.644725	0.520083	0.336589	0.165702	0.238278	0.569723	0.653989	0.729559	0.384069	0.266082	0.199033	0.279086	0.345328	0.216908	0.879658
118514727	5S ribosomal RNA	1.43552	1.26053	1.22545	0.541074	0.618104	0.751422	0.644725	0.520083	0.336589	0.165702	0.238278	0.569723	0.653989	0.729559	0.384069	0.266082	0.199033	0.279086	0.345328	0.216908	0.879658
118514728	5S ribosomal RNA	1.43552	1.26053	1.22545	0.541074	0.618104	0.751422	0.644725	0.520083	0.336589	0.165702	0.238278	0.569723	0.653989	0.729559	0.384069	0.266082	0.199033	0.279086	0.345328	0.216908	0.879658
118514729	5S ribosomal RNA	1.43552	1.26053	1.22545	0.541074	0.618104	0.751422	0.644725	0.520083	0.336589	0.165702	0.238278	0.569723	0.653989	0.729559	0.384069	0.266082	0.199033	0.279086	0.345328	0.216908	0.879658
118514730	5S ribosomal RNA	1.43552	1.26053	1.22545	0.541074	0.618104	0.751422	0.644725	0.520083	0.336589	0.165702	0.238278	0.569723	0.653989	0.729559	0.384069	0.266082	0.199033	0.279086	0.345328	0.216908	0.879658
118514731	5S ribosomal RNA	1.33144	1.54415	0	0.286769	0.188997	0.66761	1.1032	0	0	0.658666	0.458685	0.548358	0.649902	0	0.508891	0.204883	0	0	0.168161	0.208774	0.225779
118514732	5S ribosomal RNA	1.43552	1.26053	1.22545	0.541074	0.618104	0.751422	0.644725	0.520083	0.336589	0.165702	0.238278	0.569723	0.653989	0.729559	0.384069	0.266082	0.199033	0.279086	0.345328	0.216908	0.879658
118514733	5S ribosomal RNA	1.43552	1.26053	1.22545	0.541074	0.618104	0.751422	0.644725	0.520083	0.336589	0.165702	0.238278	0.569723	0.653989	0.729559	0.384069	0.266082	0.199033	0.279086	0.345328	0.216908	0.879658
118514734	5S ribosomal RNA	1.43552	1.26053	1.22545	0.541074	0.618104	0.751422	0.644725	0.520083	0.336589	0.165702	0.238278	0.569723	0.653989	0.729559	0.384069	0.266082	0.199033	0.279086	0.345328	0.216908	0.879658
118514735	5S ribosomal RNA	1.43552	1.26053	1.22545	0.541074	0.618104	0.751422	0.644725	0.520083	0.336589	0.165702	0.238278	0.569723	0.653989	0.729559	0.384069	0.266082	0.199033	0.279086	0.345328	0.216908	0.879658
118514736	5S ribosomal RNA	1.43552	1.26053	1.22545	0.541074	0.618104	0.751422	0.644725	0.520083	0.336589	0.165702	0.238278	0.569723	0.653989	0.729559	0.384069	0.266082	0.199033	0.279086	0.345328	0.216908	0.879658
118514737	5S ribosomal RNA	1.43552	1.26053	1.22545	0.541074	0.618104	0.751422	0.644725	0.520083	0.336589	0.165702	0.238278	0.569723	0.653989	0.729559	0.384069	0.266082	0.199033	0.279086	0.345328	0.216908	0.879658
118514738	5S ribosomal RNA	1.43552	1.26053	1.22545	0.541074	0.618104	0.751422	0.644725	0.520083	0.336589	0.165702	0.238278	0.569723	0.653989	0.729559	0.384069	0.266082	0.199033	0.279086	0.345328	0.216908	0.879658
118514739	5S ribosomal RNA	1.43552	1.26053	1.22545	0.541074	0.618104	0.751422	0.644725	0.520083	0.336589	0.165702	0.238278	0.569723	0.653989	0.729559	0.384069	0.266082	0.199033	0.279086	0.345328	0.216908	0.879658
118514740	5S ribosomal RNA	1.43552	1.26053	1.22545	0.541074	0.618104	0.751422	0.644725	0.520083	0.336589	0.165702	0.238278	0.569723	0.653989	0.729559	0.384069	0.266082	0.199033	0.279086	0.345328	0.216908	0.879658
118514741	5S ribosomal RNA	1.43552	1.26053	1.22545	0.541074	0.618104	0.751422	0.644725	0.520083	0.336589	0.165702	0.238278	0.569723	0.653989	0.729559	0.384069	0.266082	0.199033	0.279086	0.345328	0.216908	0.879658
118514742	5S ribosomal RNA	1.33144	1.54415	0	0.286769	0.188997	0.66761	1.1032	0	0	0.658666	0.458685	0.548358	0.649902	0	0.508891	0.204883	0	0	0.168161	0.208774	0.225779
118514743	5S ribosomal RNA	1.43552	1.26053	1.22545	0.541074	0.618104	0.751422	0.644725	0.520083	0.336589	0.165702	0.238278	0.569723	0.653989	0.729559	0.384069	0.266082	0.199033	0.279086	0.345328	0.216908	0.879658
118514744	5S ribosomal RNA	1.43552	1.26053	1.22545	0.541074	0.618104	0.751422	0.644725	0.520083	0.336589	0.165702	0.238278	0.569723	0.653989	0.729559	0.384069	0.266082	0.199033	0.279086	0.345328	0.216908	0.879658
118514745	5S ribosomal RNA	1.43552	1.26053	1.22545	0.541074	0.618104	0.751422	0.644725	0.520083	0.336589	0.165702	0.238278	0.569723	0.653989	0.729559	0.384069	0.266082	0.199033	0.279086	0.345328	0.216908	0.879658
118514746	5S ribosomal RNA	1.43552	1.26053	1.22545	0.541074	0.618104	0.751422	0.644725	0.520083	0.336589	0.165702	0.238278	0.569723	0.653989	0.729559	0.384069	0.266082	0.199033	0.279086	0.345328	0.216908	0.879658
118514747	5S ribosomal RNA	1.43552	1.26053	1.22545	0.541074	0.618104	0.751422	0.644725	0.520083	0.336589	0.165702	0.238278	0.569723	0.653989	0.729559	0.384069	0.266082	0.199033	0.279086	0.345328	0.216908	0.879658
118514748	5S ribosomal RNA	1.43552	1.26053	1.22545	0.541074	0.618104	0.751422	0.644725	0.520083	0.336589	0.165702	0.238278	0.569723	0.653989	0.729559	0.384069	0.266082	0.199033	0.279086	0.345328	0.216908	0.879658
118514749	5S ribosomal RNA	1.43552	1.26053	1.22545	0.541074	0.618104	0.751422	0.644725	0.520083	0.336589	0.165702	0.238278	0.569723	0.653989	0.729559	0.384069	0.266082	0.199033	0.279086	0.345328	0.216908	0.879658
118514750	5S ribosomal RNA	1.43552	1.26053	1.22545	0.541074	0.618104	0.751422	0.644725	0.520083	0.336589	0.165702	0.238278	0.569723	0.653989	0.729559	0.384069	0.266082	0.199033	0.279086	0.345328	0.216908	0.879658
118514751	5S ribosomal RNA	1.43552	1.26053	1.22545	0.541074	0.618104	0.751422	0.644725	0.520083	0.336589	0.165702	0.238278	0.569723	0.653989	0.729559	0.384069	0.266082	0.199033	0.279086	0.345328	0.216908	0.879658
118514752	5S ribosomal RNA	1.43552	1.26053	1.22545	0.541074	0.618104	0.751422	0.644725	0.520083	0.336589	0.165702	0.238278	0.569723	0.653989	0.729559	0.384069	0.266082	0.199033	0.279086	0.345328	0.216908	0.879658
118514753	5S ribosomal RNA	1.33144	1.54415	0	0.286769	0.188997	0.66761	1.1032	0	0	0.658666	0.458685	0.548358	0.649902	0	0.508891	0.204883	0	0	0.168161	0.208774	0.225779
118514754	5S ribosomal RNA	1.43552	1.26053	1.22545	0.541074	0.618104	0.751422	0.644725	0.520083	0.336589	0.165702	0.238278	0.569723	0.653989	0.729559	0.384069	0.266082	0.199033	0.279086	0.345328	0.216908	0.879658
118514755	5S ribosomal RNA	1.43552	1.26053	1.22545	0.541074	0.618104	0.751422	0.644725	0.520083	0.336589	0.165702	0.238278	0.569723	0.653989	0.729559	0.384069	0.266082	0.199033	0.279086	0.345328	0.216908	0.879658
118514756	5S ribosomal RNA	1.43552	1.26053	1.22545	0.541074	0.618104	0.751422	0.644725	0.520083	0.336589	0.165702	0.238278	0.569723	0.653989	0.729559	0.384069	0.266082	0.199033	0.279086	0.345328	0.216908	0.879658
118514757	5S ribosomal RNA	1.43552	1.26053	1.22545	0.541074	0.618104	0.751422	0.644725	0.520083	0.336589	0.165702	0.238278	0.569723	0.653989	0.729559	0.384069	0.266082	0.199033	0.279086	0.345328	0.216908	0.879658
118514758	5S ribosomal RNA	1.43552	1.26053	1.22545	0.541074	0.618104	0.751422	0.644725	0.520083	0.336589	0.165702	0.238278	0.569723	0.653989	0.729559	0.384069	0.266082	0.199033	0.279086	0.345328	0.216908	0.879658
118514759	5S ribosomal RNA	1.43552	1.26053	1.22545	0.541074	0.618104	0.751422	0.644725	0.520083	0.336589	0.165702	0.238278	0.569723	0.653989	0.729559	0.384069	0.266082	0.199033	0.279086	0.345328	0.216908	0.879658
118514760	5S ribosomal RNA	1.43552	1.26053	1.22545	0.541074	0.618104	0.751422	0.644725	0.520083	0.336589	0.165702	0.238278	0.569723	0.653989	0.729559	0.384069	0.266082	0.199033	0.279086	0.345328	0.216908	0.879658
118514761	5S ribosomal RNA	1.43552	1.26053	1.22545	0.541074	0.618104	0.751422	0.644725	0.520083	0.336589	0.165702	0.238278	0.569723	0.653989	0.729559	0.384069	0.266082	0.199033	0.279086	0.345328	0.216908	0.879658
118514762	5S ribosomal RNA	1.43552	1.26053	1.22545	0.541074	0.618104	0.751422	0.644725	0.520083	0.336589	0.165702	0.238278	0.569723	0.653989	0.729559	0.384069	0.266082	0.199033	0.279086	0.345328	0.216908	0.879658
118514763	5S ribosomal RNA	1.43552	1.26053	1.22545	0.541074	0.618104	0.751422	0.644725	0.520083	0.336589	0.165702	0.238278	0.569723	0.653989	0.729559	0.384069	0.266082	0.199033	0.279086	0.345328	0.216908	0.879658
118514764	5S ribosomal RNA	1.33144	1.54415	0	0.286769	0.188997	0.66761	1.1032	0	0	0.658666	0.458685	0.548358	0.649902	0	0.508891	0.204883	0	0	0.168161	0.208774	0.225779
118514765	5S ribosomal RNA	1.43552	1.26053	1.22545	0.541074	0.618104	0.751422	0.644725	0.520083	0.336589	0.165702	0.238278	0.569723	0.653989	0.729559	0.384069	0.266082	0.199033	0.279086	0.345328	0.216908	0.879658
118514766	5S ribosomal RNA	1.43552	1.26053	1.22545	0.541074	0.618104	0.751422	0.644725	0.520083	0.336589	0.165702	0.238278	0.569723	0.653989	0.729559	0.384069	0.266082	0.199033	0.279086	0.345328	0.216908	0.879658
118514767	5S ribosomal RNA	1.43552	1.26053	1.22545	0.541074	0.618104	0.751422	0.644725	0.520083	0.336589	0.165702	0.238278	0.569723	0.653989	0.729559	0.384069	0.266082	0.199033	0.279086	0.345328	0.216908	0.879658
118514768	5S ribosomal RNA	1.43552	1.26053	1.22545	0.541074	0.618104	0.751422	0.644725	0.520083	0.336589	0.165702	0.238278	0.569723	0.653989	0.729559	0.384069	0.266082	0.199033	0.279086	0.345328	0.216908	0.879658
118514769	5S ribosomal RNA	1.43552	1.26053	1.22545	0.541074	0.618104	0.751422	0.644725	0.520083	0.336589	0.165702	0.238278	0.569723	0.653989	0.729559	0.384069	0.266082	0.199033	0.279086	0.345328	0.216908	0.879658
118514770	5S ribosomal RNA	1.43552	1.26053	1.22545	0.541074	0.618104	0.751422	0.644725	0.520083	0.336589	0.165702	0.238278	0.569723	0.653989	0.729559	0.384069	0.266082	0.199033	0.279086	0.345328	0.216908	0.879658
118514771	5S ribosomal RNA	1.43552	1.26053	1.22545	0.541074	0.618104	0.751422	0.644725	0.520083	0.336589	0.165702	0.238278	0.569723	0.653989	0.729559	0.384069	0.266082	0.199033	0.279086	0.345328	0.216908	0.879658
118514772	5S ribosomal RNA	1.43552	1.26053	1.22545	0.541074	0.618104	0.751422	0.644725	0.520083	0.336589	0.165702	0.238278	0.569723	0.653989	0.729559	0.384069	0.266082	0.199033	0.279086	0.345328	0.216908	0.879658
118514773	5S ribosomal RNA	1.43552	1.26053	1.22545	0.541074	0.618104	0.751422	0.644725	0.520083	0.336589	0.165702	0.238278	0.569723	0.653989	0.729559	0.384069	0.266082	0.199033	0.279086	0.345328	0.216908	0.879658
118514774	5S ribosomal RNA	1.43552	1.26053	1.22545	0.541074	0.618104	0.751422	0.644725	0.520083	0.336589	0.165702	0.238278	0.569723	0.653989	0.729559	0.384069	0.266082	0.199033	0.279086	0.345328	0.216908	0.879658
118514775	5S ribosomal RNA	1.33144	1.54415	0	0.286769	0.188997	0.66761	1.1032	0	0	0.658666	0.458685	0.548358	0.649902	0	0.508891	0.204883	0	0	0.168161	0.208774	0.225779
118514776	5S ribosomal RNA	1.43552	1.26053	1.22545	0.541074	0.618104	0.751422	0.644725	0.520083	0.336589	0.165702	0.238278	0.569723	0.653989	0.729559	0.384069	0.266082	0.199033	0.279086	0.345328	0.216908	0.879658
118514777	5S ribosomal RNA	1.43552	1.26053	1.22545	0.541074	0.618104	0.751422	0.644725	0.520083	0.336589	0.165702	0.238278	0.569723	0.653989	0.729559	0.384069	0.266082	0.199033	0.279086	0.345328	0.216908	0.879658
118514778	5S ribosomal RNA	1.43552	1.26053	1.22545	0.541074	0.618104	0.751422	0.644725	0.520083	0.336589	0.165702	0.238278	0.569723	0.653989	0.729559	0.384069	0.266082	0.199033	0.279086	0.345328	0.216908	0.879658
118514779	5S ribosomal RNA	1.43552	1.26053	1.22545	0.541074	0.618104	0.751422	0.644725	0.520083	0.336589	0.165702	0.238278	0.569723	0.653989	0.729559	0.384069	0.266082	0.199033	0.279086	0.345328	0.216908	0.879658
118514780	5S ribosomal RNA	1.43552	1.26053	1.22545	0.541074	0.618104	0.751422	0.644725	0.520083	0.336589	0.165702	0.238278	0.569723	0.653989	0.729559	0.384069	0.266082	0.199033	0.279086	0.345328	0.216908	0.879658
118514781	5S ribosomal RNA	1.43552	1.26053	1.22545	0.541074	0.618104	0.751422	0.644725	0.520083	0.336589	0.165702	0.238278	0.569723	0.653989	0.729559	0.384069	0.266082	0.199033	0.279086	0.345328	0.216908	0.879658
118514782	5S ribosomal RNA	1.43552	1.26053	1.22545	0.541074	0.618104	0.751422	0.644725	0.520083	0.336589	0.165702	0.238278	0.569723	0.653989	0.729559	0.384069	0.266082	0.199033	0.279086	0.345328	0.216908	0.879658
118514784	5S ribosomal RNA	1.43552	1.26053	1.22545	0.541074	0.618104	0.751422	0.644725	0.520083	0.336589	0.165702	0.238278	0.569723	0.653989	0.729559	0.384069	0.266082	0.199033	0.279086	0.345328	0.216908	0.879658
118514785	5S ribosomal RNA	1.43552	1.26053	1.22545	0.541074	0.618104	0.751422	0.644725	0.520083	0.336589	0.165702	0.238278	0.569723	0.653989	0.729559	0.384069	0.266082	0.199033	0.279086	0.345328	0.216908	0.879658
118514786	5S ribosomal RNA	1.43552	1.26053	1.22545	0.541074	0.618104	0.751422	0.644725	0.520083	0.336589	0.165702	0.238278	0.569723	0.653989	0.729559	0.384069	0.266082	0.199033	0.279086	0.345328	0.216908	0.879658
118514787	5S ribosomal RNA	1.33144	1.54415	0	0.286769	0.188997	0.66761	1.1032	0	0	0.658666	0.458685	0.548358	0.649902	0	0.508891	0.204883	0	0	0.168161	0.208774	0.225779
118514788	5S ribosomal RNA	1.43552	1.26053	1.22545	0.541074	0.618104	0.751422	0.644725	0.520083	0.336589	0.165702	0.238278	0.569723	0.653989	0.729559	0.384069	0.266082	0.199033	0.279086	0.345328	0.216908	0.879658
118514789	5S ribosomal RNA	1.43552	1.26053	1.22545	0.541074	0.618104	0.751422	0.644725	0.520083	0.336589	0.165702	0.238278	0.569723	0.653989	0.729559	0.384069	0.266082	0.199033	0.279086	0.345328	0.216908	0.879658
118514790	5S ribosomal RNA	1.43552	1.26053	1.22545	0.541074	0.618104	0.751422	0.644725	0.520083	0.336589	0.165702	0.238278	0.569723	0.653989	0.729559	0.384069	0.266082	0.199033	0.279086	0.345328	0.216908	0.879658
118514791	5S ribosomal RNA	1.43552	1.26053	1.22545	0.541074	0.618104	0.751422	0.644725	0.520083	0.336589	0.165702	0.238278	0.569723	0.653989	0.729559	0.384069	0.266082	0.199033	0.279086	0.345328	0.216908	0.879658
118514792	5S ribosomal RNA	1.43552	1.26053	1.22545	0.541074	0.618104	0.751422	0.644725	0.520083	0.336589	0.165702	0.238278	0.569723	0.653989	0.729559	0.384069	0.266082	0.199033	0.279086	0.345328	0.216908	0.879658
118514793	5S ribosomal RNA	1.43552	1.26053	1.22545	0.541074	0.618104	0.751422	0.644725	0.520083	0.336589	0.165702	0.238278	0.569723	0.653989	0.729559	0.384069	0.266082	0.199033	0.279086	0.345328	0.216908	0.879658
118514794	5S ribosomal RNA	1.43552	1.26053	1.22545	0.541074	0.618104	0.751422	0.644725	0.520083	0.336589	0.165702	0.238278	0.569723	0.653989	0.729559	0.384069	0.266082	0.199033	0.279086	0.345328	0.216908	0.879658
118514795	5S ribosomal RNA	1.43552	1.26053	1.22545	0.541074	0.618104	0.751422	0.644725	0.520083	0.336589	0.165702	0.238278	0.569723	0.653989	0.729559	0.384069	0.266082	0.199033	0.279086	0.345328	0.216908	0.879658
118514796	5S ribosomal RNA	1.43552	1.26053	1.22545	0.541074	0.618104	0.751422	0.644725	0.520083	0.336589	0.165702	0.238278	0.569723	0.653989	0.729559	0.384069	0.266082	0.199033	0.279086	0.345328	0.216908	0.879658
118514797	5S ribosomal RNA	1.43552	1.26053	1.22545	0.541074	0.618104	0.751422	0.644725	0.520083	0.336589	0.165702	0.238278	0.569723	0.653989	0.729559	0.384069	0.266082	0.199033	0.279086	0.345328	0.216908	0.879658
118514798	5S ribosomal RNA	1.33144	1.54415	0	0.286769	0.188997	0.66761	1.1032	0	0	0.658666	0.458685	0.548358	0.649902	0	0.508891	0.204883	0	0	0.168161	0.208774	0.225779
118514799	5S ribosomal RNA	1.43552	1.26053	1.22545	0.541074	0.618104	0.751422	0.644725	0.520083	0.336589	0.165702	0.238278	0.569723	0.653989	0.729559	0.384069	0.266082	0.199033	0.279086	0.345328	0.216908	0.879658
118514800	5S ribosomal RNA	1.43552	1.26053	1.22545	0.541074	0.618104	0.751422	0.644725	0.520083	0.336589	0.165702	0.238278	0.569723	0.653989	0.729559	0.384069	0.266082	0.199033	0.279086	0.345328	0.216908	0.879658
118514801	5S ribosomal RNA	1.43552	1.26053	1.22545	0.541074	0.618104	0.751422	0.644725	0.520083	0.336589	0.165702	0.238278	0.569723	0.653989	0.729559	0.384069	0.266082	0.199033	0.279086	0.345328	0.216908	0.879658
118514802	5S ribosomal RNA	1.43552	1.26053	1.22545	0.541074	0.618104	0.751422	0.644725	0.520083	0.336589	0.165702	0.238278	0.569723	0.653989	0.729559	0.384069	0.266082	0.199033	0.279086	0.345328	0.216908	0.879658
118514803	5S ribosomal RNA	1.43552	1.26053	1.22545	0.541074	0.618104	0.751422	0.644725	0.520083	0.336589	0.165702	0.238278	0.569723	0.653989	0.729559	0.384069	0.266082	0.199033	0.279086	0.345328	0.216908	0.879658
118514804	5S ribosomal RNA	1.43552	1.26053	1.22545	0.541074	0.618104	0.751422	0.644725	0.520083	0.336589	0.165702	0.238278	0.569723	0.653989	0.729559	0.384069	0.266082	0.199033	0.279086	0.345328	0.216908	0.879658
118514805	5S ribosomal RNA	1.43552	1.26053	1.22545	0.541074	0.618104	0.751422	0.644725	0.520083	0.336589	0.165702	0.238278	0.569723	0.653989	0.729559	0.384069	0.266082	0.199033	0.279086	0.345328	0.216908	0.879658
118514806	5S ribosomal RNA	1.43552	1.26053	1.22545	0.541074	0.618104	0.751422	0.644725	0.520083	0.336589	0.165702	0.238278	0.569723	0.653989	0.729559	0.384069	0.266082	0.199033	0.279086	0.345328	0.216908	0.879658
118514807	5S ribosomal RNA	1.43552	1.26053	1.22545	0.541074	0.618104	0.751422	0.644725	0.520083	0.336589	0.165702	0.238278	0.569723	0.653989	0.729559	0.384069	0.266082	0.199033	0.279086	0.345328	0.216908	0.879658
118514808	5S ribosomal RNA	1.43552	1.26053	1.22545	0.541074	0.618104	0.751422	0.644725	0.520083	0.336589	0.165702	0.238278	0.569723	0.653989	0.729559	0.384069	0.266082	0.199033	0.279086	0.345328	0.216908	0.879658
118514809	5S ribosomal RNA	1.33144	1.54415	0	0.286769	0.188997	0.66761	1.1032	0	0	0.658666	0.458685	0.548358	0.649902	0	0.508891	0.204883	0	0	0.168161	0.208774	0.225779
118514810	5S ribosomal RNA	1.43552	1.26053	1.22545	0.541074	0.618104	0.751422	0.644725	0.520083	0.336589	0.165702	0.238278	0.569723	0.653989	0.729559	0.384069	0.266082	0.199033	0.279086	0.345328	0.216908	0.879658
118514811	5S ribosomal RNA	1.43552	1.26053	1.22545	0.541074	0.618104	0.751422	0.644725	0.520083	0.336589	0.165702	0.238278	0.569723	0.653989	0.729559	0.384069	0.266082	0.199033	0.279086	0.345328	0.216908	0.879658
118514812	5S ribosomal RNA	1.43552	1.26053	1.22545	0.541074	0.618104	0.751422	0.644725	0.520083	0.336589	0.165702	0.238278	0.569723	0.653989	0.729559	0.384069	0.266082	0.199033	0.279086	0.345328	0.216908	0.879658
118514813	5S ribosomal RNA	1.43552	1.26053	1.22545	0.541074	0.618104	0.751422	0.644725	0.520083	0.336589	0.165702	0.238278	0.569723	0.653989	0.729559	0.384069	0.266082	0.199033	0.279086	0.345328	0.216908	0.879658
118514814	5S ribosomal RNA	1.43552	1.26053	1.22545	0.541074	0.618104	0.751422	0.644725	0.520083	0.336589	0.165702	0.238278	0.569723	0.653989	0.729559	0.384069	0.266082	0.199033	0.279086	0.345328	0.216908	0.879658
118514815	5S ribosomal RNA	1.43552	1.26053	1.22545	0.541074	0.618104	0.751422	0.644725	0.520083	0.336589	0.165702	0.238278	0.569723	0.653989	0.729559	0.384069	0.266082	0.199033	0.279086	0.345328	0.216908	0.879658
118514816	5S ribosomal RNA	1.43552	1.26053	1.22545	0.541074	0.618104	0.751422	0.644725	0.520083	0.336589	0.165702	0.238278	0.569723	0.653989	0.729559	0.384069	0.266082	0.199033	0.279086	0.345328	0.216908	0.879658
118514817	5S ribosomal RNA	1.43552	1.26053	1.22545	0.541074	0.618104	0.751422	0.644725	0.520083	0.336589	0.165702	0.238278	0.569723	0.653989	0.729559	0.384069	0.266082	0.199033	0.279086	0.345328	0.216908	0.879658
118514818	5S ribosomal RNA	1.43552	1.26053	1.22545	0.541074	0.618104	0.751422	0.644725	0.520083	0.336589	0.165702	0.238278	0.569723	0.653989	0.729559	0.384069	0.266082	0.199033	0.279086	0.345328	0.216908	0.879658
118514819	5S ribosomal RNA	1.43552	1.26053	1.22545	0.541074	0.618104	0.751422	0.644725	0.520083	0.336589	0.165702	0.238278	0.569723	0.653989	0.729559	0.384069	0.266082	0.199033	0.279086	0.345328	0.216908	0.879658
118514820	5S ribosomal RNA	1.33144	1.54415	0	0.286769	0.188997	0.66761	1.1032	0	0	0.658666	0.458685	0.548358	0.649902	0	0.508891	0.204883	0	0	0.168161	0.208774	0.225779
118514821	5S ribosomal RNA	1.43552	1.26053	1.22545	0.541074	0.618104	0.751422	0.644725	0.520083	0.336589	0.165702	0.238278	0.569723	0.653989	0.729559	0.384069	0.266082	0.199033	0.279086	0.345328	0.216908	0.879658
118514822	5S ribosomal RNA	1.43552	1.26053	1.22545	0.541074	0.618104	0.751422	0.644725	0.520083	0.336589	0.165702	0.238278	0.569723	0.653989	0.729559	0.384069	0.266082	0.199033	0.279086	0.345328	0.216908	0.879658
118514823	5S ribosomal RNA	1.43552	1.26053	1.22545	0.541074	0.618104	0.751422	0.644725	0.520083	0.336589	0.165702	0.238278	0.569723	0.653989	0.729559	0.384069	0.266082	0.199033	0.279086	0.345328	0.216908	0.879658
118514825	5S ribosomal RNA	1.43552	1.26053	1.22545	0.541074	0.618104	0.751422	0.644725	0.520083	0.336589	0.165702	0.238278	0.569723	0.653989	0.729559	0.384069	0.266082	0.199033	0.279086	0.345328	0.216908	0.879658
118514826	5S ribosomal RNA	1.43552	1.26053	1.22545	0.541074	0.618104	0.751422	0.644725	0.520083	0.336589	0.165702	0.238278	0.569723	0.653989	0.729559	0.384069	0.266082	0.199033	0.279086	0.345328	0.216908	0.879658
118514827	5S ribosomal RNA	0	0	0	0	0	0	0	0	0	0	0	0	0	0	0	0	0	0	0	0	0
118514828	5S ribosomal RNA	1.43552	1.26053	1.22545	0.541074	0.618104	0.751422	0.644725	0.520083	0.336589	0.165702	0.238278	0.569723	0.653989	0.729559	0.384069	0.266082	0.199033	0.279086	0.345328	0.216908	0.879658
118514829	5S ribosomal RNA	1.43552	1.26053	1.22545	0.541074	0.618104	0.751422	0.644725	0.520083	0.336589	0.165702	0.238278	0.569723	0.653989	0.729559	0.384069	0.266082	0.199033	0.279086	0.345328	0.216908	0.879658
118514830	5S ribosomal RNA	1.43552	1.26053	1.22545	0.541074	0.618104	0.751422	0.644725	0.520083	0.336589	0.165702	0.238278	0.569723	0.653989	0.729559	0.384069	0.266082	0.199033	0.279086	0.345328	0.216908	0.879658
118514831	5S ribosomal RNA	1.43552	1.26053	1.22545	0.541074	0.618104	0.751422	0.644725	0.520083	0.336589	0.165702	0.238278	0.569723	0.653989	0.729559	0.384069	0.266082	0.199033	0.279086	0.345328	0.216908	0.879658
118514832	5S ribosomal RNA	1.43552	1.26053	1.22545	0.541074	0.618104	0.751422	0.644725	0.520083	0.336589	0.165702	0.238278	0.569723	0.653989	0.729559	0.384069	0.266082	0.199033	0.279086	0.345328	0.216908	0.879658
118514833	5S ribosomal RNA	1.33144	1.54415	0	0.286769	0.188997	0.66761	1.1032	0	0	0.658666	0.458685	0.548358	0.649902	0	0.508891	0.204883	0	0	0.168161	0.208774	0.225779
118514834	5S ribosomal RNA	1.43552	1.26053	1.22545	0.541074	0.618104	0.751422	0.644725	0.520083	0.336589	0.165702	0.238278	0.569723	0.653989	0.729559	0.384069	0.266082	0.199033	0.279086	0.345328	0.216908	0.879658
118514835	5S ribosomal RNA	1.43552	1.26053	1.22545	0.541074	0.618104	0.751422	0.644725	0.520083	0.336589	0.165702	0.238278	0.569723	0.653989	0.729559	0.384069	0.266082	0.199033	0.279086	0.345328	0.216908	0.879658
118514836	5S ribosomal RNA	1.43552	1.26053	1.22545	0.541074	0.618104	0.751422	0.644725	0.520083	0.336589	0.165702	0.238278	0.569723	0.653989	0.729559	0.384069	0.266082	0.199033	0.279086	0.345328	0.216908	0.879658
118514837	5S ribosomal RNA	1.43552	1.26053	1.22545	0.541074	0.618104	0.751422	0.644725	0.520083	0.336589	0.165702	0.238278	0.569723	0.653989	0.729559	0.384069	0.266082	0.199033	0.279086	0.345328	0.216908	0.879658
118514838	5S ribosomal RNA	1.43552	1.26053	1.22545	0.541074	0.618104	0.751422	0.644725	0.520083	0.336589	0.165702	0.238278	0.569723	0.653989	0.729559	0.384069	0.266082	0.199033	0.279086	0.345328	0.216908	0.879658
118514839	5S ribosomal RNA	1.43552	1.26053	1.22545	0.541074	0.618104	0.751422	0.644725	0.520083	0.336589	0.165702	0.238278	0.569723	0.653989	0.729559	0.384069	0.266082	0.199033	0.279086	0.345328	0.216908	0.879658
118514840	5S ribosomal RNA	1.43552	1.26053	1.22545	0.541074	0.618104	0.751422	0.644725	0.520083	0.336589	0.165702	0.238278	0.569723	0.653989	0.729559	0.384069	0.266082	0.199033	0.279086	0.345328	0.216908	0.879658
118514841	5S ribosomal RNA	1.43552	1.26053	1.22545	0.541074	0.618104	0.751422	0.644725	0.520083	0.336589	0.165702	0.238278	0.569723	0.653989	0.729559	0.384069	0.266082	0.199033	0.279086	0.345328	0.216908	0.879658
118514842	5S ribosomal RNA	1.43552	1.26053	1.22545	0.541074	0.618104	0.751422	0.644725	0.520083	0.336589	0.165702	0.238278	0.569723	0.653989	0.729559	0.384069	0.266082	0.199033	0.279086	0.345328	0.216908	0.879658
118514843	5S ribosomal RNA	1.43552	1.26053	1.22545	0.541074	0.618104	0.751422	0.644725	0.520083	0.336589	0.165702	0.238278	0.569723	0.653989	0.729559	0.384069	0.266082	0.199033	0.279086	0.345328	0.216908	0.879658
118514844	5S ribosomal RNA	1.33144	1.54415	0	0.286769	0.188997	0.66761	1.1032	0	0	0.658666	0.458685	0.548358	0.649902	0	0.508891	0.204883	0	0	0.168161	0.208774	0.225779
118514845	5S ribosomal RNA	1.43552	1.26053	1.22545	0.541074	0.618104	0.751422	0.644725	0.520083	0.336589	0.165702	0.238278	0.569723	0.653989	0.729559	0.384069	0.266082	0.199033	0.279086	0.345328	0.216908	0.879658
118514846	5S ribosomal RNA	1.43552	1.26053	1.22545	0.541074	0.618104	0.751422	0.644725	0.520083	0.336589	0.165702	0.238278	0.569723	0.653989	0.729559	0.384069	0.266082	0.199033	0.279086	0.345328	0.216908	0.879658
118514847	5S ribosomal RNA	1.43552	1.26053	1.22545	0.541074	0.618104	0.751422	0.644725	0.520083	0.336589	0.165702	0.238278	0.569723	0.653989	0.729559	0.384069	0.266082	0.199033	0.279086	0.345328	0.216908	0.879658
118514848	5S ribosomal RNA	1.43552	1.26053	1.22545	0.541074	0.618104	0.751422	0.644725	0.520083	0.336589	0.165702	0.238278	0.569723	0.653989	0.729559	0.384069	0.266082	0.199033	0.279086	0.345328	0.216908	0.879658
118514849	5S ribosomal RNA	1.43552	1.26053	1.22545	0.541074	0.618104	0.751422	0.644725	0.520083	0.336589	0.165702	0.238278	0.569723	0.653989	0.729559	0.384069	0.266082	0.199033	0.279086	0.345328	0.216908	0.879658
118514850	5S ribosomal RNA	1.43552	1.26053	1.22545	0.541074	0.618104	0.751422	0.644725	0.520083	0.336589	0.165702	0.238278	0.569723	0.653989	0.729559	0.384069	0.266082	0.199033	0.279086	0.345328	0.216908	0.879658
118514851	5S ribosomal RNA	1.43552	1.26053	1.22545	0.541074	0.618104	0.751422	0.644725	0.520083	0.336589	0.165702	0.238278	0.569723	0.653989	0.729559	0.384069	0.266082	0.199033	0.279086	0.345328	0.216908	0.879658
118514852	5S ribosomal RNA	1.43552	1.26053	1.22545	0.541074	0.618104	0.751422	0.644725	0.520083	0.336589	0.165702	0.238278	0.569723	0.653989	0.729559	0.384069	0.266082	0.199033	0.279086	0.345328	0.216908	0.879658
118514853	5S ribosomal RNA	1.43552	1.26053	1.22545	0.541074	0.618104	0.751422	0.644725	0.520083	0.336589	0.165702	0.238278	0.569723	0.653989	0.729559	0.384069	0.266082	0.199033	0.279086	0.345328	0.216908	0.879658
118514854	5S ribosomal RNA	1.43552	1.26053	1.22545	0.541074	0.618104	0.751422	0.644725	0.520083	0.336589	0.165702	0.238278	0.569723	0.653989	0.729559	0.384069	0.266082	0.199033	0.279086	0.345328	0.216908	0.879658
118514856	5S ribosomal RNA	1.33144	1.54415	0	0.286769	0.188997	0.66761	1.1032	0	0	0.658666	0.458685	0.548358	0.649902	0	0.508891	0.204883	0	0	0.168161	0.208774	0.225779
118514857	5S ribosomal RNA	1.43552	1.26053	1.22545	0.541074	0.618104	0.751422	0.644725	0.520083	0.336589	0.165702	0.238278	0.569723	0.653989	0.729559	0.384069	0.266082	0.199033	0.279086	0.345328	0.216908	0.879658
118514858	5S ribosomal RNA	1.43552	1.26053	1.22545	0.541074	0.618104	0.751422	0.644725	0.520083	0.336589	0.165702	0.238278	0.569723	0.653989	0.729559	0.384069	0.266082	0.199033	0.279086	0.345328	0.216908	0.879658
118514859	5S ribosomal RNA	1.43552	1.26053	1.22545	0.541074	0.618104	0.751422	0.644725	0.520083	0.336589	0.165702	0.238278	0.569723	0.653989	0.729559	0.384069	0.266082	0.199033	0.279086	0.345328	0.216908	0.879658
118514860	5S ribosomal RNA	1.43552	1.26053	1.22545	0.541074	0.618104	0.751422	0.644725	0.520083	0.336589	0.165702	0.238278	0.569723	0.653989	0.729559	0.384069	0.266082	0.199033	0.279086	0.345328	0.216908	0.879658
118514861	5S ribosomal RNA	1.43552	1.26053	1.22545	0.541074	0.618104	0.751422	0.644725	0.520083	0.336589	0.165702	0.238278	0.569723	0.653989	0.729559	0.384069	0.266082	0.199033	0.279086	0.345328	0.216908	0.879658
118514862	5S ribosomal RNA	1.43552	1.26053	1.22545	0.541074	0.618104	0.751422	0.644725	0.520083	0.336589	0.165702	0.238278	0.569723	0.653989	0.729559	0.384069	0.266082	0.199033	0.279086	0.345328	0.216908	0.879658
118514863	5S ribosomal RNA	1.43552	1.26053	1.22545	0.541074	0.618104	0.751422	0.644725	0.520083	0.336589	0.165702	0.238278	0.569723	0.653989	0.729559	0.384069	0.266082	0.199033	0.279086	0.345328	0.216908	0.879658
118514864	5S ribosomal RNA	1.43552	1.26053	1.22545	0.541074	0.618104	0.751422	0.644725	0.520083	0.336589	0.165702	0.238278	0.569723	0.653989	0.729559	0.384069	0.266082	0.199033	0.279086	0.345328	0.216908	0.879658
118514865	5S ribosomal RNA	1.43552	1.26053	1.22545	0.541074	0.618104	0.751422	0.644725	0.520083	0.336589	0.165702	0.238278	0.569723	0.653989	0.729559	0.384069	0.266082	0.199033	0.279086	0.345328	0.216908	0.879658
118514866	5S ribosomal RNA	1.43552	1.26053	1.22545	0.541074	0.618104	0.751422	0.644725	0.520083	0.336589	0.165702	0.238278	0.569723	0.653989	0.729559	0.384069	0.266082	0.199033	0.279086	0.345328	0.216908	0.879658
118514867	5S ribosomal RNA	1.33144	1.54415	0	0.286769	0.188997	0.66761	1.1032	0	0	0.658666	0.458685	0.548358	0.649902	0	0.508891	0.204883	0	0	0.168161	0.208774	0.225779
118514868	5S ribosomal RNA	1.43552	1.26053	1.22545	0.541074	0.618104	0.751422	0.644725	0.520083	0.336589	0.165702	0.238278	0.569723	0.653989	0.729559	0.384069	0.266082	0.199033	0.279086	0.345328	0.216908	0.879658
118514869	5S ribosomal RNA	1.43552	1.26053	1.22545	0.541074	0.618104	0.751422	0.644725	0.520083	0.336589	0.165702	0.238278	0.569723	0.653989	0.729559	0.384069	0.266082	0.199033	0.279086	0.345328	0.216908	0.879658
118514870	5S ribosomal RNA	1.43552	1.26053	1.22545	0.541074	0.618104	0.751422	0.644725	0.520083	0.336589	0.165702	0.238278	0.569723	0.653989	0.729559	0.384069	0.266082	0.199033	0.279086	0.345328	0.216908	0.879658
118514871	5S ribosomal RNA	1.43552	1.26053	1.22545	0.541074	0.618104	0.751422	0.644725	0.520083	0.336589	0.165702	0.238278	0.569723	0.653989	0.729559	0.384069	0.266082	0.199033	0.279086	0.345328	0.216908	0.879658
118514872	5S ribosomal RNA	1.43552	1.26053	1.22545	0.541074	0.618104	0.751422	0.644725	0.520083	0.336589	0.165702	0.238278	0.569723	0.653989	0.729559	0.384069	0.266082	0.199033	0.279086	0.345328	0.216908	0.879658
118514873	5S ribosomal RNA	1.43552	1.26053	1.22545	0.541074	0.618104	0.751422	0.644725	0.520083	0.336589	0.165702	0.238278	0.569723	0.653989	0.729559	0.384069	0.266082	0.199033	0.279086	0.345328	0.216908	0.879658
118514874	5S ribosomal RNA	1.43552	1.26053	1.22545	0.541074	0.618104	0.751422	0.644725	0.520083	0.336589	0.165702	0.238278	0.569723	0.653989	0.729559	0.384069	0.266082	0.199033	0.279086	0.345328	0.216908	0.879658
118514875	5S ribosomal RNA	1.43552	1.26053	1.22545	0.541074	0.618104	0.751422	0.644725	0.520083	0.336589	0.165702	0.238278	0.569723	0.653989	0.729559	0.384069	0.266082	0.199033	0.279086	0.345328	0.216908	0.879658
118514876	5S ribosomal RNA	1.43552	1.26053	1.22545	0.541074	0.618104	0.751422	0.644725	0.520083	0.336589	0.165702	0.238278	0.569723	0.653989	0.729559	0.384069	0.266082	0.199033	0.279086	0.345328	0.216908	0.879658
118514877	5S ribosomal RNA	1.43552	1.26053	1.22545	0.541074	0.618104	0.751422	0.644725	0.520083	0.336589	0.165702	0.238278	0.569723	0.653989	0.729559	0.384069	0.266082	0.199033	0.279086	0.345328	0.216908	0.879658
118514878	5S ribosomal RNA	1.33144	1.54415	0	0.286769	0.188997	0.66761	1.1032	0	0	0.658666	0.458685	0.548358	0.649902	0	0.508891	0.204883	0	0	0.168161	0.208774	0.225779
118514879	5S ribosomal RNA	1.43552	1.26053	1.22545	0.541074	0.618104	0.751422	0.644725	0.520083	0.336589	0.165702	0.238278	0.569723	0.653989	0.729559	0.384069	0.266082	0.199033	0.279086	0.345328	0.216908	0.879658
118514880	5S ribosomal RNA	0	0	0	0	0	0	0	0	0	0	0	0	0	0	0	0	5.10851	0	0	0	0
118514882	5S ribosomal RNA	1.43552	0	0	0.541074	0.618104	0	0	0	0	0.165702	0	0	0.653989	0	0.384069	0	0	0	0	0	0
118514883	5S ribosomal RNA	1.43552	0	0	0.541074	0.618104	0	0	0	0	0.165702	0	0	0.653989	0	0.384069	0	0	0	0	0	0
118514884	5S ribosomal RNA	1.43552	0	0	0.541074	0.618104	0	0	0	0	0.165702	0	0	0.653989	0	0.384069	0	0	0	0	0	0
118514885	5S ribosomal RNA	0	0	0	0	0	0	0	0	0	0	0	0	0	0	0	0	0	0	0	0	0
118514886	5S ribosomal RNA	1.43552	0	0	0.541074	0.618104	0	0	0	0	0.165702	0	0	0.653989	0	0.384069	0	0	0	0	0	0
118514887	5S ribosomal RNA	0	0	0	0	0	0	0	0	0	0	0	0	0	0	0	4.09767	0	0	0	4.17547	0
118514888	5S ribosomal RNA	0	0	0	0	0	0	0	0	0	0	0	0	0	0	0	4.09767	0	0	0	4.17547	0
118514889	5S ribosomal RNA	0	3.12057	0	0	0	0	0	0	0	0	0	0	0	0	0	0	0	0	0	0	0
118514890	5S ribosomal RNA	1.33144	1.54415	0	0.286769	0.188997	0.66761	1.1032	0	0	0.658666	0.458685	0.548358	0.649902	0	0.508891	0.204883	0	0	0.168161	0.208774	0.225779
118514891	5S ribosomal RNA	0	3.12057	0	0	0	0	0	0	0	0	0	0	0	0	0	0	0	0	0	0	0
118514892	5S ribosomal RNA	0	0	0	0	0	0	0	0	0	0	0	0	0	0	0	0	0	0	0	0	0
118514893	5S ribosomal RNA	0	0	0	0	0	0	0	0	0	0	0	0	0	0	0	0	0	0	0	0	0
118514894	5S ribosomal RNA	0	0	0	0	0	0	0	0	0	0	0	0	0	0	0	0	0	0	0	0	0
118514895	5S ribosomal RNA	0	0	0	0	0	0	0	0	0	0	0	0	0	0	0	0	0	0	0	0	0
118514896	5S ribosomal RNA	0	0	0	0	0	0	0	0	0	0	0	0	0	6.24178	6.26327	0	0	0	5.50344	0	0
118514897	5S ribosomal RNA	0	0	0	0	0	0	0	0	0	0	0	0	0	0	0	0	0	0	0	0	0
118514898	5S ribosomal RNA	0	0	0	0	0	0	0	0	0	0	0	0	0	0	0	0	0	0	0	0	0
118514899	5S ribosomal RNA	0	0	1.53023	0	0	0	0	0	0	0	0	0	0	0	0	0	0	0	0	0	0
118514900	5S ribosomal RNA	0	0	1.53023	0	0	0	0	0	0	0	0	0	0	0	0	0	0	0	0	0	0
118514901	5S ribosomal RNA	1.33144	1.54415	0	0.286769	0.188997	0.66761	1.1032	0	0	0.658666	0.458685	0.548358	0.649902	0	0.508891	0.204883	0	0	0.168161	0.208774	0.225779
118514902	5S ribosomal RNA	0	0	1.53023	0	0	0	0	0	0	0	0	0	0	0	0	0	0	0	0	0	0
118514903	5S ribosomal RNA	0	0	1.53023	0	0	0	0	0	0	0	0	0	0	0	0	0	0	0	0	0	0
118514904	5S ribosomal RNA	0	0	1.53023	0	0	0	0	0	0	0	0	0	0	0	0	0	0	0	0	0	0
118514905	5S ribosomal RNA	0	0	1.53023	0	0	0	0	0	0	0	0	0	0	0	0	0	0	0	0	0	0
118514906	5S ribosomal RNA	0	0	0	0	0	0	0	0	0	0	0	0	0	0	0	0	0	0	0	0	0
118514907	5S ribosomal RNA	0	0	0	0	0	0	0	0	0	0	0	0	0	0	0	0	0	0	0	0	0
118514908	5S ribosomal RNA	0	0	0	0	0	0	0	0	0	0	1.7858	0	0	0	0	0	0	0	0	0	0
118514909	5S ribosomal RNA	0	0	0	0	0	0	0	0	0	0	1.7858	0	0	0	0	0	0	0	0	0	0
118514910	5S ribosomal RNA	0	0	0	0	0	0	0	0	0	0	1.7858	0	0	0	0	0	0	0	0	0	0
118514911	5S ribosomal RNA	0	0	0	0	0	0	0	0	0	0	1.7858	0	0	0	0	0	0	0	0	0	0
118514913	5S ribosomal RNA	1.33144	1.54415	0	0.286769	0.188997	0.66761	1.1032	0	0	0.658666	0.458685	0.548358	0.649902	0	0.508891	0.204883	0	0	0.168161	0.208774	0.225779
118514924	5S ribosomal RNA	1.33144	1.54415	0	0.286769	0.188997	0.66761	1.1032	0	0	0.658666	0.458685	0.548358	0.649902	0	0.508891	0.204883	0	0	0.168161	0.208774	0.225779
118514935	5S ribosomal RNA	1.33144	1.54415	0	0.286769	0.188997	0.66761	1.1032	0	0	0.658666	0.458685	0.548358	0.649902	0	0.508891	0.204883	0	0	0.168161	0.208774	0.225779
118514943	5S ribosomal RNA	1.33144	1.54415	0	0.286769	0.188997	0.66761	1.1032	0	0	0.658666	0.458685	0.548358	0.649902	0	0.508891	0.204883	0	0	0.168161	0.208774	0.225779
118514945	5S ribosomal RNA	1.33144	1.54415	0	0.286769	0.188997	0.66761	1.1032	0	0	0.658666	0.458685	0.548358	0.649902	0	0.508891	0.204883	0	0	0.168161	0.208774	0.225779
118514946	5S ribosomal RNA	1.33144	1.54415	0	0.286769	0.188997	0.66761	1.1032	0	0	0.658666	0.458685	0.548358	0.649902	0	0.508891	0.204883	0	0	0.168161	0.208774	0.225779
118514947	5S ribosomal RNA	1.33144	1.54415	0	0.286769	0.188997	0.66761	1.1032	0	0	0.658666	0.458685	0.548358	0.649902	0	0.508891	0.204883	0	0	0.168161	0.208774	0.225779
118514948	5S ribosomal RNA	1.33144	1.54415	0	0.286769	0.188997	0.66761	1.1032	0	0	0.658666	0.458685	0.548358	0.649902	0	0.508891	0.204883	0	0	0.168161	0.208774	0.225779
118514949	5S ribosomal RNA	1.33144	1.54415	0	0.286769	0.188997	0.66761	1.1032	0	0	0.658666	0.458685	0.548358	0.649902	0	0.508891	0.204883	0	0	0.168161	0.208774	0.225779
118514950	5S ribosomal RNA	1.33144	1.54415	0	0.286769	0.188997	0.66761	1.1032	0	0	0.658666	0.458685	0.548358	0.649902	0	0.508891	0.204883	0	0	0.168161	0.208774	0.225779
118514951	5S ribosomal RNA	1.33144	1.54415	0	0.286769	0.188997	0.66761	1.1032	0	0	0.658666	0.458685	0.548358	0.649902	0	0.508891	0.204883	0	0	0.168161	0.208774	0.225779
118514952	5S ribosomal RNA	1.33144	1.54415	0	0.286769	0.188997	0.66761	1.1032	0	0	0.658666	0.458685	0.548358	0.649902	0	0.508891	0.204883	0	0	0.168161	0.208774	0.225779
118514953	5S ribosomal RNA	1.33144	1.54415	0	0.286769	0.188997	0.66761	1.1032	0	0	0.658666	0.458685	0.548358	0.649902	0	0.508891	0.204883	0	0	0.168161	0.208774	0.225779
118514954	5S ribosomal RNA	1.33144	1.54415	0	0.286769	0.188997	0.66761	1.1032	0	0	0.658666	0.458685	0.548358	0.649902	0	0.508891	0.204883	0	0	0.168161	0.208774	0.225779
118514956	5S ribosomal RNA	1.33144	1.54415	0	0.286769	0.188997	0.66761	1.1032	0	0	0.658666	0.458685	0.548358	0.649902	0	0.508891	0.204883	0	0	0.168161	0.208774	0.225779
118514957	5S ribosomal RNA	1.33144	1.54415	0	0.286769	0.188997	0.66761	1.1032	0	0	0.658666	0.458685	0.548358	0.649902	0	0.508891	0.204883	0	0	0.168161	0.208774	0.225779
118514958	5S ribosomal RNA	1.33144	1.54415	0	0.286769	0.188997	0.66761	1.1032	0	0	0.658666	0.458685	0.548358	0.649902	0	0.508891	0.204883	0	0	0.168161	0.208774	0.225779
118514959	5S ribosomal RNA	1.33144	1.54415	0	0.286769	0.188997	0.66761	1.1032	0	0	0.658666	0.458685	0.548358	0.649902	0	0.508891	0.204883	0	0	0.168161	0.208774	0.225779
118514960	5S ribosomal RNA	1.33144	1.54415	0	0.286769	0.188997	0.66761	1.1032	0	0	0.658666	0.458685	0.548358	0.649902	0	0.508891	0.204883	0	0	0.168161	0.208774	0.225779
118514961	5S ribosomal RNA	1.33144	1.54415	0	0.286769	0.188997	0.66761	1.1032	0	0	0.658666	0.458685	0.548358	0.649902	0	0.508891	0.204883	0	0	0.168161	0.208774	0.225779
118514962	5S ribosomal RNA	1.33144	1.54415	0	0.286769	0.188997	0.66761	1.1032	0	0	0.658666	0.458685	0.548358	0.649902	0	0.508891	0.204883	0	0	0.168161	0.208774	0.225779
118514963	5S ribosomal RNA	1.33144	1.54415	0	0.286769	0.188997	0.66761	1.1032	0	0	0.658666	0.458685	0.548358	0.649902	0	0.508891	0.204883	0	0	0.168161	0.208774	0.225779
118514964	5S ribosomal RNA	1.43552	1.26053	1.22545	0.541074	0.618104	0.751422	0.644725	0.520083	0.336589	0.165702	0.238278	0.569723	0.653989	0.729559	0.384069	0.266082	0.199033	0.279086	0.345328	0.216908	0.879658
118514965	5S ribosomal RNA	1.43552	1.26053	1.22545	0.541074	0.618104	0.751422	0.644725	0.520083	0.336589	0.165702	0.238278	0.569723	0.653989	0.729559	0.384069	0.266082	0.199033	0.279086	0.345328	0.216908	0.879658
118514966	5S ribosomal RNA	1.43552	1.26053	1.22545	0.541074	0.618104	0.751422	0.644725	0.520083	0.336589	0.165702	0.238278	0.569723	0.653989	0.729559	0.384069	0.266082	0.199033	0.279086	0.345328	0.216908	0.879658
118514967	5S ribosomal RNA	1.33144	1.54415	0	0.286769	0.188997	0.66761	1.1032	0	0	0.658666	0.458685	0.548358	0.649902	0	0.508891	0.204883	0	0	0.168161	0.208774	0.225779
118514968	5S ribosomal RNA	1.43552	1.26053	1.22545	0.541074	0.618104	0.751422	0.644725	0.520083	0.336589	0.165702	0.238278	0.569723	0.653989	0.729559	0.384069	0.266082	0.199033	0.279086	0.345328	0.216908	0.879658
118514969	5S ribosomal RNA	1.43552	1.26053	1.22545	0.541074	0.618104	0.751422	0.644725	0.520083	0.336589	0.165702	0.238278	0.569723	0.653989	0.729559	0.384069	0.266082	0.199033	0.279086	0.345328	0.216908	0.879658
118514970	5S ribosomal RNA	1.43552	1.26053	1.22545	0.541074	0.618104	0.751422	0.644725	0.520083	0.336589	0.165702	0.238278	0.569723	0.653989	0.729559	0.384069	0.266082	0.199033	0.279086	0.345328	0.216908	0.879658
118514971	5S ribosomal RNA	1.43552	1.26053	1.22545	0.541074	0.618104	0.751422	0.644725	0.520083	0.336589	0.165702	0.238278	0.569723	0.653989	0.729559	0.384069	0.266082	0.199033	0.279086	0.345328	0.216908	0.879658
118514972	5S ribosomal RNA	1.43552	1.26053	1.22545	0.541074	0.618104	0.751422	0.644725	0.520083	0.336589	0.165702	0.238278	0.569723	0.653989	0.729559	0.384069	0.266082	0.199033	0.279086	0.345328	0.216908	0.879658
118506657	60 kDa SS-A/Ro ribonucleoprotein-like	19.9359	19.3423	19.1655	22.2491	19.9631	21.2543	26.6924	27.0083	24.027	27.2138	25.3435	23.4221	24.0757	20.0529	19.8189	23.2898	23.1734	26.3985	20.9942	20.225	19.7064
118504700	60S acidic ribosomal protein P0, transcript variant X1	14.0453	15.951	16.3443	14.4532	18.3923	15.0011	29.2415	25.6866	18.8839	25.0991	22.3957	19.9855	23.0802	22.7148	16.4332	20.463	20.7581	21.9611	20.7687	20.4488	15.6182
118504700	60S acidic ribosomal protein P0, transcript variant X2	717.495	721.418	606.381	712.729	601.895	667.4	706.768	766.428	902.455	812.182	836.786	829.25	902.277	908.547	917.477	957.923	877.851	868.882	957.323	946.499	964.094
118513979	60S acidic ribosomal protein P1	1475.56	1645.39	1250.36	1544.82	1263.4	1480.15	1530.75	1560.93	1814.61	1791.61	1906.47	1835.03	1855.51	1894.89	1953.66	2022.48	1749.36	1809.82	1864.05	1834.73	2021.65
118506860	60S acidic ribosomal protein P2, transcript variant X1	1501.25	1525.13	1227.16	1470.36	1328.56	1347.13	1543.89	1494.35	1732.52	1609.13	1617.43	1596.87	1530.97	1590.85	1597.61	1609.84	1379.75	1537.18	1543.32	1529.24	1914.62
118506860	60S acidic ribosomal protein P2, transcript variant X2	197.373	266.576	167.34	322.883	174.379	206.997	132.065	109.19	230.953	244.542	267.216	217.903	315.614	284.739	371.762	287.648	372.227	264.162	283.364	361.089	238.36
118506860	60S acidic ribosomal protein P2, transcript variant X3	82.1258	84.9867	76.8356	81.0802	71.3237	86.3805	100.492	91.8396	117.209	84.8778	102.564	102.435	124.917	125.486	112.163	107.177	91.2233	127.496	86.6845	96.9753	101.339
118509415	60S ribosomal export protein NMD3	38.1983	39.7918	39.4276	36.6865	37.0129	38.1813	44.9068	42.2847	48.6324	47.5268	47.71	49.5364	47.2189	47.6221	46.5352	41.4913	46.4147	43.8836	49.402	46.0925	52.6958
118506947	60S ribosomal protein L10	1660.81	1682.47	1379.59	1425.24	1204.02	1327.44	1214.47	1333.88	1626.3	1295.49	1251.26	1296.43	1261.8	1328.7	1417.28	1483.19	1370.94	1335.47	1333.58	1345.06	1395.44
118517610	60S ribosomal protein L10a	1231.35	1228.21	973.758	1247.08	1050.13	1080.27	1053.68	1102.22	1326.55	1181.65	1232.96	1177.77	1239.96	1282.35	1355.14	1307.55	1236.02	1260.17	1279.33	1255.33	1412.96
118508009	60S ribosomal protein L10-like, transcript variant X1	985.995	1004.15	905.845	1042.09	927.278	997.641	985.871	1118.07	1193.19	1193.87	1154.98	1156.02	1112.66	1131.92	1198.59	1153.97	1094.29	1087.71	1209.34	1252.13	1233.11
118508009	60S ribosomal protein L10-like, transcript variant X2	2.20324	2.23096	3.62385	4.57191	1.61035	1.75825	2.95281	5.17027	7.39198	6.07424	5.54754	4.1923	4.60064	5.42051	7.57205	7.7383	4.32421	7.30076	7.26292	6.8592	6.3381
118505814	60S ribosomal protein L11	1645.33	1612.84	1281.89	1770.21	1316.13	1486.16	1928.28	1918.12	2342.87	2109.86	2057.35	2093.74	2044.05	2157.73	2218.65	2139.4	1955.27	2087.91	2157.74	2266.62	2463.76
118511201	60S ribosomal protein L12	2117.41	2237.79	1727.92	2209.72	1757.41	1997.66	1693.68	1703.37	2042.88	1853.37	1954.04	1860.46	1809.09	1936.71	1915.44	1831.59	1805.15	1872.14	1757.86	1789.98	1987.9
118507726	60S ribosomal protein L13	1326.41	1472.21	1138.37	1399.16	1144.06	1265.09	1182.19	1301.77	1556.52	1343.15	1311.8	1309.84	1264.63	1364.09	1365.17	1366.33	1308.48	1289.77	1322.43	1379.5	1380.2
118510989	60S ribosomal protein L13a	2104.48	2170.3	1702.69	2200.51	1718.45	1909.88	2189.19	2228.73	2648.87	2409.4	2311.84	2286.37	2213.7	2337.49	2394.67	2240.28	2141.18	2224.13	2228.35	2233.96	2565.06
118513034	60S ribosomal protein L14	1816.31	1891.38	1547.58	1791.19	1427.37	1644.51	1495.86	1641.98	1860.59	1702.84	1733.42	1697.5	1658.63	1735.91	1736.05	1782.78	1588.11	1666.18	1704.15	1674.45	1809
118511886	60S ribosomal protein L15, transcript variant X1	768.314	803.994	651.889	792.901	656.093	713.813	687.145	719.887	857.561	785.748	758.721	781.405	770.177	808.021	847.174	770.391	735.34	763.693	781.649	817.012	886.517
118516452	60S ribosomal protein L15, transcript variant X1	768.314	803.994	651.889	792.901	656.093	713.813	687.145	719.887	857.561	785.748	758.721	781.405	770.177	808.021	847.174	770.391	735.34	763.693	781.649	817.012	886.517
118511886	60S ribosomal protein L15, transcript variant X2	11.4345	12.2849	8.46007	11.8961	10.9359	12.6781	8.72623	11.5923	18.3457	10.4466	10.8691	10.9288	17.1816	9.68699	13.0164	10.1012	11.146	14.0761	14.4498	8.96906	11.8208
118516452	60S ribosomal protein L15, transcript variant X2	11.4345	12.2849	8.46007	11.8961	10.9359	12.6781	8.72623	11.5923	18.3457	10.4466	10.8691	10.9288	17.1816	9.68699	13.0164	10.1012	11.146	14.0761	14.4498	8.96906	11.8208
118506549	60S ribosomal protein L17, transcript variant X1	115.956	152.197	114.734	126.267	89.2055	97.492	105.255	91.0243	113.974	92.8779	100.214	96.8428	95.8289	80.1928	111.107	92.3351	119.772	97.2275	110.002	118.379	138.929
118506549	60S ribosomal protein L17, transcript variant X2	2250.93	2200.51	1828.23	2345.81	1849.38	2059.37	2221.11	2076.66	2586.17	2245.93	2262.84	2132.53	2074.16	2217.29	2253.48	2022.05	2007.91	2134.53	1962.59	2079.72	2308.61
118506549	60S ribosomal protein L17, transcript variant X3	6.2621	5.46849	2.7241	4.49926	2.90203	3.10475	0.869635	3.81713	3.5128	0.854265	2.45695	2.72446	3.72477	2.90565	3.20494	4.73947	1.91785	2.71687	5.15629	3.38341	4.37857
118512082	60S ribosomal protein L18, transcript variant X1	4.6476	4.67762	4.73487	4.56859	6.41415	6.54114	6.16833	11.9631	7.32861	8.22648	17.5835	12.5962	20.5458	22.8926	22.7352	18.2462	19.969	17.8632	13.9138	9.67945	11.1076
118512082	60S ribosomal protein L18, transcript variant X2	2213.9	2211.52	1808.78	2155.37	1818.42	2021.08	1991.82	2158.76	2522.85	2317.62	2343.13	2288.33	2099.88	2271.53	2382.65	2117.07	2012.47	2058.67	2101.26	2250.69	2356.3
118512082	60S ribosomal protein L18, transcript variant X3	416.477	421.098	302.695	373.646	275.188	345.906	308.548	366.403	456.755	427.835	391.14	355.597	459.264	450.812	393.036	491.913	419.24	473.901	551.079	473.015	505.621
118512082	60S ribosomal protein L18, transcript variant X4	0.869257	0.41727	1.3171	1.93867	1.80863	0.684612	1.13519	2.08964	0.97816	2.18779	1.08554	0.260272	5.73314	1.23036	2.93654	4.72821	3.72545	2.75605	1.0227	0.687061	0.559462
118503071	60S ribosomal protein L18a	1842.86	1922.68	1510.52	1907.08	1501.21	1704.82	1665.53	1799.39	2143.33	1877.67	1916	1799.94	1801.85	1913.91	1924.84	1954.17	1786.69	1796.73	1845.75	1824.75	1991.2
118503195	60S ribosomal protein L19	3073.12	3190.07	2340.96	2838.78	2369.37	2647.14	2589.02	2820.69	3575.51	2927.18	2898.17	2815.38	2563.26	2713.3	2941.95	2994.49	2683.97	2718.53	2884.92	2942.38	2947.38
118509774	60S ribosomal protein L22-like	2866.35	2872.17	2309.34	2897.18	2266.19	2503.57	2643.11	2640.07	3029.38	2707.83	2822.45	2596.88	2404.92	2548.8	2511.62	2980.99	2668.24	2729.5	2639.62	2665.38	2646.66
118511001	60S ribosomal protein L23	1747.93	1859.72	1418.8	1872.39	1455.94	1558.97	1665.51	1791.61	1989.08	1843.96	1784.62	1829.21	1806.12	1894.93	1868.19	1816.14	1596.83	1703.89	1808.52	1715.45	2044.51
118511047	60S ribosomal protein L24	2089.16	2054.59	1625.82	2115.66	1630.03	1816.1	2182.49	2232.24	2635.36	2286.37	2260.11	2152.1	2016.14	2153.92	2198.3	2159.28	2059.43	2143.39	2139.53	2216.06	2374.67
118508299	60S ribosomal protein L26-like, transcript variant X1	79.1673	77.6387	97.9886	70.548	76.3832	76.7322	94.5928	100.697	91.3389	85.5297	90.3551	96.1065	94.645	92.0123	90.6469	81.729	99.6647	83.4914	103.349	95.635	81.6583
118508299	60S ribosomal protein L26-like, transcript variant X2	1746.5	1910.17	1523.42	1822.15	1501.11	1689.84	2027.66	2028.3	2430.62	2139.39	2056.87	2053.72	1951.34	2128.2	2169.3	2183.32	2064.56	2134.04	2187.99	2327.46	2345.44
118508299	60S ribosomal protein L26-like, transcript variant X3	458.715	409.063	365.763	465.02	278.861	354.937	469.685	604.116	627.675	575.575	635.726	544.648	494.354	462.095	394.902	388.978	432.003	472.397	526.689	429.52	671.176
118508299	60S ribosomal protein L26-like, transcript variant X4	13.4306	13.9707	19.052	13.274	16.7398	15.4369	9.64947	13.8092	10.8674	11.8379	11.8358	15.184	13.5647	12.6683	18.01	12.3713	12.7438	8.89946	11.8928	15.9987	8.83272
118505917	60S ribosomal protein L27, transcript variant X1	2190.97	2193	1836.75	2171.55	1779.57	1930.2	2059.65	2194.41	2605.16	2232.45	2203.15	2282.45	2251.9	2354.57	2432.59	2352.78	2142.88	2215.96	2322.85	2300.91	2421.96
118505917	60S ribosomal protein L27, transcript variant X2	10.7015	4.98496	7.41318	9.94121	8.09136	11.3094	5.23657	6.75305	8.14384	6.06024	4.34227	4.3107	7.46572	6.2355	7.46443	7.18667	6.88578	8.10051	7.40394	2.78766	7.72634
118505932	60S ribosomal protein L27a	1539.5	1638.78	1271.55	1633.52	1283.48	1412.49	1544	1566.59	1834.14	1592.87	1608.56	1578.03	1629.32	1661.55	1719.01	1721	1614.47	1672.28	1733.21	1855.77	1800.39
118510559	60S ribosomal protein L28, transcript variant X1	1858.89	1855.28	1537.97	1864.37	1567.22	1644.56	1767.16	1825.73	2205.34	1839.33	1816.78	1790.57	1676.81	1768.06	1844.97	1986.91	1825.08	1935.25	1942.92	1983.44	1956.61
118510559	60S ribosomal protein L28, transcript variant X2	13.1506	27.3977	17.542	22.6766	21.4952	17.8124	15.8516	14.0607	14.7231	12.6888	12.8118	19.023	17.5513	15.3106	6.19122	15.4605	13.8746	17.7527	14.1864	17.6681	15.5967
118514359	60S ribosomal protein L29	2317.64	2445.09	1944.67	2385.26	1945.68	2168.46	2140.13	2140.39	2574.8	2390.32	2326.7	2167.87	2104.25	2294.54	2233.25	2473.81	2133.84	2203.59	2343.44	2192.76	2271.73
118502606	60S ribosomal protein L30	1764.58	1897.98	1511.5	1905.32	1472.44	1677.36	1651.69	1732.9	2140.37	1840.97	1863.63	1877.31	1879.15	2029.32	1873.4	2081.26	1857.37	1955.55	1955.5	1896.19	2119.48
118507087	60S ribosomal protein L31	2386.68	2477.73	2016.7	2413.22	1962.63	2231.63	2056.52	2371.15	2714.73	2568.91	2605.86	2418.33	2384.95	2514.37	2544.21	3004.4	2575.06	2553.48	2776.74	2750.64	2747.09
118506292	60S ribosomal protein L32	2090.19	2214.39	1687.15	2207.15	1687.29	1960.68	2027.22	2258.98	2613.52	2301.08	2330.99	2215.77	2153.91	2230.83	2248.38	2296.88	2104.76	2147.09	2279.28	2195.99	2363.63
118510858	60S ribosomal protein L34-like	1658.04	1769.55	1359.56	1666.7	1291.53	1472.16	1599.41	1657.46	2016.56	1815.47	1777.02	1731.91	1683.8	1747.72	1754.76	1731.78	1595.13	1695.14	1774.85	1689.64	1992.89
118506478	60S ribosomal protein L35	2241.24	2337.23	1841.81	2327.9	1804.92	2003.62	2017.05	2190.24	2632.15	2285.65	2373.03	2224.64	2210.71	2374.87	2320.26	2355.58	2196.11	2220.85	2399.26	2405.77	2590.78
118505100	60S ribosomal protein L35a	1677.44	1828.42	1510.34	1783.18	1395.98	1568.62	1745.06	1839.58	2197.63	1856.82	1810	1793.17	1737.96	1841.49	1848.9	1923.82	1821.03	1921.74	2103.4	2050.01	2249.33
118507661	60S ribosomal protein L36	3419.25	3516.4	2840.05	3419.55	2778.42	3059.06	3566.75	3791.8	4470.6	3862.94	4022.86	3840.8	3570.67	3860.84	3807.06	4146.39	3710.49	3899.88	4122.04	3991.23	4101.42
118509063	60S ribosomal protein L37a	2271.36	2482.67	1833.11	2435.15	1948.71	2160.37	2580.07	2586.75	3104.48	2742.13	2743.42	2769.59	2578.19	2744.33	2805.91	3059.08	2459.66	2623.3	2751.88	2760.82	2936.76
118511131	60S ribosomal protein L38	1694.96	1693.43	1375.29	1707.04	1359.46	1594.14	1854.5	1804.88	2131.62	1952.32	2038.26	1883.67	1815.11	1994.17	1914.26	1978.69	1998.71	2108.38	2074.44	2058.64	2144.51
118508450	60S ribosomal protein L4	1490.95	1591.37	1229.01	1494.8	1228.66	1376.41	1503.24	1673.11	1953.3	1591.54	1644.6	1574.46	1551.09	1696.69	1725.45	1591.35	1567.68	1563.05	1586.45	1693.76	1751.37
118504252	60S ribosomal protein L44	2724.12	2744.98	2168.28	2748.56	2226.99	2477.27	2686.63	2750.89	3341.57	2864.49	2949.49	2815.23	2479.67	2729.94	2797.93	3199.76	2780.92	2969.68	3011.14	2827.15	3070.67
118514569	60S ribosomal protein L5	1120.81	1107.66	937.652	1180.73	982.718	1066.05	993.513	1026.21	1192.97	1044.58	1020.3	1016.27	986	996.638	1049.32	1015.15	991.972	1023.53	964.999	1055.16	1049.56
118506610	60S ribosomal protein L6	2044.29	1985.24	1698.7	1955.76	1610.24	1824.05	1536.8	1615.7	1949.13	1613.11	1684.15	1593.05	1571.74	1621.51	1671.31	1726.34	1684.58	1651.5	1673.1	1734.31	1770.24
118513214	60S ribosomal protein L7	1774.96	1825.76	1373.14	1693.3	1365.82	1546.63	1633.11	1777.49	2153.15	1830.4	1875.9	1816.47	1778.71	1922.69	1933.33	1927.13	1740.13	1837.86	1948.71	1965.36	2082.9
118513065	60S ribosomal protein L7a	2395.96	2569.28	2028.08	2437.41	1993.88	2162.33	1954.48	2022.39	2518.24	2034.61	2074.4	2053.46	1846.07	2067.95	2031.95	2060.52	1880.74	1967.55	1987.26	2057.22	2149.35
118512106	60S ribosomal protein L7-like	29.8837	38.6031	23.6027	30.5352	14.9787	31.4221	8.32664	25.0714	26.5491	17.6129	23.9343	24.4843	35.2778	27.57	28.843	27.9049	13.9095	26.245	48.8049	21.5307	37.0775
118514426	60S ribosomal protein L8	1306.34	1335.96	1076.46	1318.5	1067.13	1194.35	1198.71	1279.18	1507.04	1306.11	1248.53	1257.75	1279.6	1352.85	1417.81	1385.25	1213.65	1251.6	1306.93	1369.64	1466.03
118510706	60S ribosomal protein L9, transcript variant X1	52.6507	49.1763	45.365	46.9215	38.0083	59.8091	54.8554	42.6154	46.6841	45.579	44.8035	43.0346	48.825	55.6409	42.8731	53.3555	47.1081	39.8124	40.4736	60.3953	56.2905
118510706	60S ribosomal protein L9, transcript variant X2	2630.65	2753.19	2153.75	2627.85	2173.11	2381.25	3274.16	3361.4	4113.04	3490.57	3530.65	3380.16	3380.12	3654.81	3606.09	3655.46	3368.94	3574.47	3576.57	3673.54	3914.08
118508481	60S ribosome subunit biogenesis protein NIP7 homolog	41.8117	35.8467	34.814	38.4116	36.9826	45.4874	25.715	29.2617	25.9141	32.7544	39.3653	31.8776	35.2778	39.9577	41.565	35.5129	34.3361	33.7295	42.3966	31.2271	38.208
118511645	6-phosphofructo-2-kinase/fructose-2,6-bisphosphatase-like, transcript variant X1	15.5683	12.0468	15.3546	13.7622	14.5634	18.3394	23.2741	21.3815	24.2818	23.5117	18.0861	22.4768	20.247	21.3016	21.6992	20.3452	21.2035	19.0052	10.0598	13.0467	12.0844
118511645	6-phosphofructo-2-kinase/fructose-2,6-bisphosphatase-like, transcript variant X2	1.61629	2.06437	1.98074	2.13756	2.65194	0.828949	2.82079	1.6939	3.25532	2.83564	1.69235	2.40107	3.59021	3.95476	2.64246	4.13065	4.05415	6.07302	1.62591	3.50591	2.65993
118511645	6-phosphofructo-2-kinase/fructose-2,6-bisphosphatase-like, transcript variant X3	9.63266	9.51339	7.32781	9.85869	14.7394	11.0384	7.08137	3.58681	13.7143	12.5882	11.0264	6.33971	4.90415	11.9663	11.952	19.7797	13.907	9.03503	10.0473	15.9213	10.7929
118511645	6-phosphofructo-2-kinase/fructose-2,6-bisphosphatase-like, transcript variant X4	1.98995	2.66116	0	1.58574	1.31234	2.18843	4.89305	2.54843	3.04183	3.7238	0	0	5.32794	3.87927	2.35952	1.93855	2.37573	3.34147	2.25812	2.1052	0
118511645	6-phosphofructo-2-kinase/fructose-2,6-bisphosphatase-like, transcript variant X5	5.52881e-08	2.35834	3.77298	7.73031	0	4.65936	0.00366839	10.7636	3.23477	0.000158936	2.36217	0.235896	3.13552	2.45767	4.97613	0.000111215	9.07898	20.3379	4.07051	2.26085e-08	1.93476
118511645	6-phosphofructo-2-kinase/fructose-2,6-bisphosphatase-like, transcript variant X6	1.40338	0	3.20168	1.40008	2.43309	0	0	0	1.54961	4.23667	2.61147	2.71301e-09	2.93346	3.34128	1.04977	1.54825	1.1501	1.24863	1.19589e-08	1.55989	0
118511645	6-phosphofructo-2-kinase/fructose-2,6-bisphosphatase-like, transcript variant X7	4.47002	4.64513e-08	0.732521	6.19406e-07	1.32357	3.27407	10.6236	0.022305	2.18657e-06	0.0111153	7.75255e-09	10.5229	0	0	0	0.00521996	6.8136e-06	0.00020577	0.000389616	0.47564	3.3586e-08
118503010	6-phosphogluconate dehydrogenase, decarboxylating	21.2512	14.1656	17.2878	17.5322	17.2177	18.2402	27.5299	23.179	29.5938	31.5592	26.5031	35.9277	26.2773	28.3926	30.5182	21.2684	22.9106	27.9887	24.251	57.4329	47.3399
118511756	6-pyruvoyl tetrahydrobiopterin synthase	39.0003	39.693	29.8759	44.6634	38.0034	43.281	35.2708	32.6051	39.9576	46.3334	46.9611	47.2365	46.0441	46.3161	45.8724	46.1983	43.9526	40.9903	39.703	38.1555	46.7509
118512316	85/88 kDa calcium-independent phospholipase A2, transcript variant X1	0	0	0	0	0	0	0	0	0	0	0	0	0	0	0	0	0	0	0	0	0
118512316	85/88 kDa calcium-independent phospholipase A2, transcript variant X2	11.2541	8.56556	11.6274	9.08528	10.1898	8.06513	17.2989	18.0601	10.7326	11.3629	12.4727	12.8881	13.9741	14.4725	13.1795	8.4833	9.62123	8.55109	15.7153	13.9308	11.6505
118512316	85/88 kDa calcium-independent phospholipase A2, transcript variant X3	1.29613	1.07014	0.873879	1.60161	1.25706	1.50946	0	0.995143	0	2.23137	0	1.06884	1.12312	1.24756	1.82105	1.30651	0.70856	1.11322	1.21515	1.22875	2.37652
118512316	85/88 kDa calcium-independent phospholipase A2, transcript variant X4	2.67037	4.95129	5.33174	3.10068	4.51622	3.56514	3.92847	5.114	4.05111	2.32643	2.4909	2.44768	5.02518	6.34412	2.7835	2.71311	4.05306	4.01582	6.47772	3.37877	3.86907
118512316	85/88 kDa calcium-independent phospholipase A2, transcript variant X5	16.4026	17.3372	17.2113	13.4219	16.5515	17.1229	19.4667	14.8935	16.5239	16.0059	18.311	14.8515	15.4756	14.358	13.8022	18.9493	19.137	19.0848	15.6545	11.344	15.6116
118512316	85/88 kDa calcium-independent phospholipase A2, transcript variant X6	21.1678	16.4628	17.8734	26.673	27.884	23.2275	19.2895	20.6816	15.5103	22.882	19.5195	19.757	22.1815	13.6391	16.616	18.6598	17.5734	23.75	12.9942	14.0364	17.9856
118512316	85/88 kDa calcium-independent phospholipase A2, transcript variant X7	2.63186	4.64797	4.18759	1.98429	2.40215	3.37085	0	3.73661	0.0142145	0	1.40599	1.27824	1.71509	4.87657	3.82538	0.53087	0.228744	0	0.415751	9.44838e-10	0.374897
118506935	8-oxo-dGDP phosphatase NUDT18	17.6666	19.9932	17.0229	19.941	17.897	21.2091	26.3437	24.5255	24.1608	26.1649	25.1489	21.0161	24.9208	25.5686	22.8863	22.1926	20.9603	27.9884	25.0874	23.5258	24.2526
118505965	A disintegrin and metalloproteinase with thrombospondin motifs 1, transcript variant X1	0.00294536	0	0	0	0	0	0	0	0	0	0	0	0	0	0	0	0	0	0	0	0
118505965	A disintegrin and metalloproteinase with thrombospondin motifs 1, transcript variant X2	1.3226	0.814735	0.706855	1.13221	0.909399	1.3358	0	0	0	0.254098	0.242114	0	0.215493	0	0.108282	0.166043	0.088352	0.425213	0	0	0
118505965	A disintegrin and metalloproteinase with thrombospondin motifs 1, transcript variant X3	0	0.470758	0	0	1.02256	0.508897	0	0	0	0	0	0	0	0	0	0	0	0	0	0	0
118505965	A disintegrin and metalloproteinase with thrombospondin motifs 1, transcript variant X4	0.617765	0	0.404946	0	0	0	0	0	0	0	0	0	0	0.0410718	0	0	0	0.0840416	0	0	0
118505965	A disintegrin and metalloproteinase with thrombospondin motifs 1, transcript variant X5	0	0	0	0	0	0	0	0	0	0	0	0	0	0	0	0	0	0	0	0	0
118505965	A disintegrin and metalloproteinase with thrombospondin motifs 1, transcript variant X6	0.131745	0	0	0.30167	0	0	0.424395	0.110845	0.127918	0.0702697	0.0791392	0.0690504	0.0250187	0	0	1.62061e-09	0	0	0.107428	0.374764	0.0923916
118505965	A disintegrin and metalloproteinase with thrombospondin motifs 1, transcript variant X7	0.419716	0	0.772654	0.516519	0	0	0	0.0524746	0	0	0	0	0	0.0417681	0	0	0	0	0	0	0
118505965	A disintegrin and metalloproteinase with thrombospondin motifs 1, transcript variant X8	1.91392	0.668511	1.36333	1.94287	1.75111	0.343096	0	0	0.132053	0	0	0.135741	0	0.0348816	0	0	0	0.203248	0	0.163512	0
118505965	A disintegrin and metalloproteinase with thrombospondin motifs 1, transcript variant X9	0.0535749	0.18112	0.451062	0.125511	0.0610956	0.0701718	0.0468094	0	0	0.0720051	0	0.0600079	0	0	0	0	0	0.138001	0	0.0809827	0.0196144
118517578	A disintegrin and metalloproteinase with thrombospondin motifs 7, transcript variant X1	0	1.2331	2.47369	2.05672	1.90472	2.06148	2.8762	0	1.37294	2.23849	0.836198	0	0.825048	0	0.797201	0.745854	0.984516	1.33784	1.04895	2.06012	0.72559
118517578	A disintegrin and metalloproteinase with thrombospondin motifs 7, transcript variant X2	2.09498	1.2053e-05	2.7296e-05	0.148308	1.03519e-07	0	0.427869	1.08046	7.93672e-06	0.00715017	0.490755	1.62791	0.235218	0.894821	0.0227864	0.0964452	3.5335e-07	0.825057	0	0.0025179	0.932421
118517578	A disintegrin and metalloproteinase with thrombospondin motifs 7, transcript variant X3	0.124053	0	0	0	0.181131	0	0	0	0	0.128306	0.0914962	0	0	0	0.0680256	0	0	0.0948898	0	0	0
118517578	A disintegrin and metalloproteinase with thrombospondin motifs 7, transcript variant X4	0	0.287972	0.422781	0	0	0.359992	0	0.416121	0	0.34756	0	0	0.321187	0	0	0	0	0.277976	0	0.553338	0
118504785	A disintegrin and metalloproteinase with thrombospondin motifs 9, transcript variant X1	0	3.33531e-09	2.3486e-07	5.66959e-08	0	5.92192e-07	0	0	0	1.88948e-07	0	0	0	7.4456e-10	0	6.28281e-07	0	3.0686e-07	0	0	1.89363e-08
118504785	A disintegrin and metalloproteinase with thrombospondin motifs 9, transcript variant X10	0	0	0	0	0	5.06837e-10	0.0216421	0	0	0	0	0	0	0	0	0	0	0	0	0	8.46125e-05
118504785	A disintegrin and metalloproteinase with thrombospondin motifs 9, transcript variant X11	0	2.65708e-06	1.78759e-07	0	0	1.51546e-08	0	0	0	0.00149547	0.00213033	0	0	8.03324e-06	0	0	0	0	0	0	0.00214722
118504785	A disintegrin and metalloproteinase with thrombospondin motifs 9, transcript variant X12	0	0	4.56859e-08	0	0	8.61789e-10	0.0244439	0	0	0	0	0	0	9.23549e-09	0	0	0	0	0	0	1.45053e-05
118504785	A disintegrin and metalloproteinase with thrombospondin motifs 9, transcript variant X13	0	6.27464e-05	0	0.412408	0.172641	0	0	1.8156e-10	0	1.56072e-09	0	0	0	1.25847e-09	0	3.67925e-06	0	2.1771e-08	0	0.000329013	0
118504785	A disintegrin and metalloproteinase with thrombospondin motifs 9, transcript variant X14	0	0.00171685	0.189755	0.255394	0.00518911	0	0	0.47514	0	0.712376	0	8.06777e-08	0	0	0	0.159272	0	0.00580663	0.340535	0	0
118504785	A disintegrin and metalloproteinase with thrombospondin motifs 9, transcript variant X15	0.0238087	0.134767	0.0354593	0.0475033	0.0312217	0.0627181	0.0915409	0.189963	0.0565469	0.226919	0.127846	0.0348608	0.051998	0.113381	0	0.105996	0	0.0290009	0.145482	0.0246342	0.105678
118504785	A disintegrin and metalloproteinase with thrombospondin motifs 9, transcript variant X2	0	0.000846089	0.0381268	0.0102801	0	0.185685	0	0	0	0.137813	1.54656e-05	9.19884e-07	8.16982e-08	0.000116325	8.45123e-07	0.132492	1.26641e-09	0.183431	4.19517e-07	1.15833e-07	0.00322388
118504785	A disintegrin and metalloproteinase with thrombospondin motifs 9, transcript variant X3	0	0	0	0	0	0	0	0	0	0	0	0.741834	0	0	0.68094	0	0	1.98271e-09	0	0.287277	0
118504785	A disintegrin and metalloproteinase with thrombospondin motifs 9, transcript variant X4	2.12181	1.11955	1.83422	1.4618	1.5177	1.1774	1.1877	0.934836	1.25281	0.620064	0.917353	1.11222	1.54149	0.952431	0.378763	0.923295	0.452789	1.16837	0.467544	0.78056	0.637115
118504785	A disintegrin and metalloproteinase with thrombospondin motifs 9, transcript variant X5	0	0	0.727688	8.05339e-08	0.369914	0.470952	0.191987	0	0.131864	2.79442e-07	0.762633	0	0	0	0	8.96361e-07	0.248477	1.16195e-09	0	0	0
118504785	A disintegrin and metalloproteinase with thrombospondin motifs 9, transcript variant X6	0.566076	0.383828	0.791812	0.217833	0.650132	0.475233	0.210196	0	0.138694	0.251852	0	0	0	0	0	0.347457	0	0	0.415794	0	0
118504785	A disintegrin and metalloproteinase with thrombospondin motifs 9, transcript variant X7	0.164559	1.00852	5.79621e-10	0.500889	0.155995	0	0	0.689163	0.143208	0	0	0	0.220942	0.344853	0	1.60252e-10	0.703108	3.3287e-07	0	0	0
118504785	A disintegrin and metalloproteinase with thrombospondin motifs 9, transcript variant X8	0	2.31588e-09	0	0	0	4.95312e-10	0.209722	0	0	0.00684425	2.45394e-09	0	2.9092e-08	0	0	0	0	0	0	0	0.402799
118504785	A disintegrin and metalloproteinase with thrombospondin motifs 9, transcript variant X9	0.130079	0	0.0037942	0.0110575	0.163792	0	0.263458	0	0	1.21574e-09	0	0	0	0	0	0	0	0.437317	0	0	0
118511844	A disintegrin and metalloproteinase with thrombospondin motifs adt-1	0.574625	0.39085	0.754682	0.169321	0.265447	0.269253	0.232338	0.305727	0.310237	0.772177	0.714285	0.455928	0.289679	0.381311	0.25822	0.312748	0.487512	0.514642	0.184608	0.308937	0.190425
118513297	A disintegrin and metalloproteinase with thrombospondin motifs adt-2-like	0	0.0737919	0.043972	0.0608713	0.0349673	0.113504	0.0419471	0	0.0411724	0	0	0	0	0.0360263	0	0.130611	0	0.0340085	0.0367127	0.0410904	0.0315062
118505927	A-agglutinin anchorage subunit-like, transcript variant X1	11.7123	11.099	11.026	12.3271	13.2758	13.436	15.4827	16.3969	11.2638	14.6756	15.2201	14.5719	17.8309	13.3028	14.6421	12.5877	12.7486	15.5455	16.3518	14.257	14.5668
118506647	A-agglutinin anchorage subunit-like, transcript variant X1	54.2381	53.6162	69.6894	55.9773	69.8819	67.5343	77.6717	74.1534	63.0462	73.4629	69.6382	74.1656	67.0971	67.4246	66.0472	64.7871	69.224	66.9587	67.0987	73.7954	66.9569
118505927	A-agglutinin anchorage subunit-like, transcript variant X2	0	0	0	0	0	0	0	0	0	0	0	0	0	0	0	1.49089	0	0	0	0	0
118506647	A-agglutinin anchorage subunit-like, transcript variant X2	29.1522	23.3313	28.2082	23.012	18.5817	29.2536	25.1713	29.7985	27.2208	25.6676	25.9178	27.0951	31.1411	24.004	27.7443	24.5315	40.2164	22.4699	36.3932	28.2371	25.2541
118505927	A-agglutinin anchorage subunit-like, transcript variant X3	0.464533	0	0	0	0	0	0	0	0	0	0	0	0	0	0	0	0	0.450787	0	0	1.02716
118503069	aarF domain-containing kinase 1, transcript variant X1	16.2611	17.5141	20.3691	16.2286	19.3867	17.2964	22.8547	21.7126	16.8221	22.1501	21.502	20.8389	21.2191	21.2974	21.0665	18.3646	17.5149	19.9117	24.4889	20.6598	20.4473
118503069	aarF domain-containing kinase 1, transcript variant X2	0	0	0.631699	0.557102	0	0	1.42344	2.97015	1.44181	0.786871	0.738047	0.574891	2.82551	2.43125	0.872925	2.41101	0.873211	2.48614	1.79568	0	0.731658
118504249	abasic site processing protein HMCES	1.66109	2.45942	2.63663	2.38874	2.41723	2.00444	8.51546	4.62657	6.73361	4.80697	4.20238	4.29767	4.21315	4.55122	5.10227	5.2599	4.62307	4.5512	4.23233	5.15278	5.56512
118512621	ABC transporter C family member 8-like	0.471375	0.270585	0.247784	1.20017	1.0052	1.02377	0.141811	0.0788369	0.232101	0.167532	0.0911965	0.254993	0.101308	0.426898	0.223088	0.11048	0.236677	0.210769	0.186205	0.161709	0.195642
118505373	ABC transporter F family member 4	51.8068	45.6053	51.4717	50.5073	38.6764	53.3075	46.0756	46.909	47.9603	46.1762	48.8952	40.5339	47.6289	49.4416	44.2331	45.2852	42.0368	39.8452	53.8776	41.2652	42.6268
118505561	ABC transporter G family member 20, transcript variant X1	0.532671	0.199681	0.236874	0.405158	0.256696	0.213393	0.186228	0.138038	0.36599	0.344234	0	0.604012	0.106574	0.138653	0.31393	0.0968244	0.209181	0.420709	0.257441	0.568184	0.0936528
118505561	ABC transporter G family member 20, transcript variant X2	0	0	0	0.040947	1.9458e-07	0	0.0816811	0.36408	0.0652065	0	0	0	0.0511475	0	0	0.418672	0	0	0	0	0.212278
118505561	ABC transporter G family member 20, transcript variant X3	0	0	0.344606	0	0	0.170187	0.445548	0	0.218907	0.16807	0	0	0.191234	0	0.200072	0	0.108836	0.317993	0.199314	0.537843	0
118505561	ABC transporter G family member 20, transcript variant X4	0	0	1.08225e-06	0	0	0	3.45276e-07	0.234495	2.45496e-07	1.06955e-07	0	0	5.17041e-07	0	5.99126e-07	0	2.56578e-07	2.51083e-07	2.21355e-07	5.2652e-07	0
118505561	ABC transporter G family member 20, transcript variant X5	0	0.286831	0	0.478405	0	0	0	0	0	0.66386	0.365124	0	0	0.212719	0	0	0.0688897	0	0	0	0
118504943	ABC transporter G family member 23, transcript variant X1	1.18896	0	0.609044	0	0	0	0.935652	0	0	0	0	0	0	0	0	0	0	0	0	1.18109	0
118507535	ABC transporter G family member 23, transcript variant X1	0.811086	0.812157	0.915316	1.30683	3.60131e-06	0.73925	2.26569	0.582556	8.65534e-06	1.29815	0.314777	1.02749	1.68764e-05	0.272288	0.51747	0.475061	0	6.48041e-10	0	4.86245	1.29764e-05
118504943	ABC transporter G family member 23, transcript variant X2	1.60301	0.715935	0	2.57668	1.84968	2.16838e-09	0.671706	1.40062	1.69596	4.02207e-08	0	4.46613e-10	1.57246	0.896852	0.327088	0.539371	1.21993	0.267573	0.324572	6.54752	0.529535
118507535	ABC transporter G family member 23, transcript variant X2	0	0	0	0	0	0	0	0	0	0	0	0	0	0.19721	0	0	0	0	0	0	0
118504943	ABC transporter G family member 23, transcript variant X3	1.93465	0.709215	2.21151	2.33249	0.67086	3.26324	0.804076	0	0	2.58186	1.69489	1.89663	0	0	0.759556	1.25418	0	3.90533	1.40805	6.82186	0.606548
118507535	ABC transporter G family member 23, transcript variant X3	0.495989	2.35335e-09	0	1.03336	0.628347	0	0	0	1.07449	0	0	1.68207	0.992648	0	0	0	0	2.52068	6.86222e-07	2.47563	0.684498
118507535	ABC transporter G family member 23, transcript variant X4	19.1559	8.4371	10.596	23.9966	12.9538	18.998	3.29997	3.71652e-06	2.04385	1.55028	3.12557	2.84732	1.22705	5.19927e-06	1.46409	4.16143e-06	1.91345	2.44037	2.21241	7.46959	1.19982
118507535	ABC transporter G family member 23, transcript variant X5	3.6573	0.483615	1.73865	2.64215	1.90383	1.00076	0.962395	1.21136	0.57471	1.21989	7.44939e-10	2.21003e-08	0	1.4201	0	1.56403	5.21084e-05	1.93139e-07	3.59217e-10	0.000300552	0.965457
118510043	ABC transporter G family member 6-like	10.7941	10.2754	12.837	14.214	15.659	13.7367	15.3006	14.9023	15.2427	14.36	14.4122	17.0643	7.9984	8.95345	9.14518	6.35015	7.23144	8.72809	11.086	11.4358	11.3528
118514555	abhydrolase domain-containing protein 2	81.6489	77.2505	96.8602	95.7802	114.549	97.606	79.5805	94.1087	70.8269	98.4322	109.53	100.244	87.7265	86.804	85.759	65.4182	82.2728	73.9608	95.396	74.0772	81.7016
118504954	abl interactor 2	93.9675	96.9417	97.4268	101.994	102.549	103.832	79.7241	83.3644	87.6622	90.1748	85.2862	86.0193	92.3214	93.5419	89.7773	86.5156	95.3476	100.711	85.2357	83.1145	78.0006
118504984	abnormal cell migration protein 10, transcript variant X1	4.36532	5.91851	10.1361	4.70848	8.76443	5.4243	6.4553	8.4822	5.17075	6.16444	4.81094	6.86313	6.10434	9.22163	7.1616	5.86876	8.88536	7.04801	6.53388	7.45796	5.00481
118504984	abnormal cell migration protein 10, transcript variant X2	7.33812	9.71259	11.4776	10.1083	15.5564	10.5575	9.20602	12.9752	7.10114	9.54448	11.2232	9.61789	11.766	13.4553	12.4463	10.2988	11.4581	14.839	12.6486	10.3479	9.09025
118504984	abnormal cell migration protein 10, transcript variant X3	0.555574	0.279542	1.06109	0.448529	0.699077	0.384162	0.611074	0.574605	0.204725	0.4167	0.501612	0	0.346102	0.636699	0.0984348	0.325726	0.463961	0.584624	0.093184	0.0950821	0.387499
118504984	abnormal cell migration protein 10, transcript variant X4	11.5569	14.2469	22.6472	10.7546	20.2405	14.6628	24.845	24.8947	13.6117	19.5186	16.7062	17.1418	20.7666	15.8938	18.8084	16.1485	22.2337	19.8779	26.1054	21.9166	15.3423
118505578	abscission/NoCut checkpoint regulator	20.0714	18.9958	18.2937	20.1464	18.0244	19.8545	20.284	24.2139	21.1963	18.35	19.9734	15.0332	23.1751	19.3969	21.1149	21.7991	16.9601	18.2526	26.2296	16.911	25.6828
118507695	accessory gland protein Acp32CD-like, transcript variant X1	0	0	0	0	0	0	0	0	0	0	0	0	0	0	0	0	0	0	0	0	0
118507695	accessory gland protein Acp32CD-like, transcript variant X10	13.5198	20.5648	22.2588	20.3901	19.8557	20.3144	22.5592	21.188	15.9947	22.2119	19.7736	19.5736	22.6986	23.7566	22.0519	13.5516	14.6962	16.2626	17.4913	14.2916	22.3834
118507695	accessory gland protein Acp32CD-like, transcript variant X11	24.3417	27.5845	26.578	30.3512	29.2312	20.4448	27.3052	18.1683	22.7604	11.921	27.3205	40.6629	35.1322	35.7665	34.4814	22.0636	24.5739	26.4753	29.8398	25.8071	22.3324
118507695	accessory gland protein Acp32CD-like, transcript variant X12	10.5585	6.75528	10.8933	0.991488	13.0595	25.4123	2.12004	9.34105	0.663424	14.8472	6.53309	2.44463	0.860819	4.79751	0.380732	6.15446	3.19567	10.3948	8.921	4.79694	9.45663
118507695	accessory gland protein Acp32CD-like, transcript variant X2	6.03562	4.57868	3.35979	3.07092	6.27394	6.32003	4.32202	6.64953	9.89437	6.62171	8.32924	11.6004	7.25381	8.75788	8.5326	7.28587	4.97488	6.85357	6.91181	5.73703	3.81301
118507695	accessory gland protein Acp32CD-like, transcript variant X3	0	0	0	0	0	0	0	0	0	0	0	0	0	0	0	0	0	0	0	0	0
118507695	accessory gland protein Acp32CD-like, transcript variant X4	0	0	0	0	0	0	0	0	0	0	0	0	0	0	0	0	0	0	0	0	0
118507695	accessory gland protein Acp32CD-like, transcript variant X5	2.93178	4.04453	5.3218	5.91249	5.40639	7.73044	6.46375	3.83486	4.30963	4.98737	7.22021	7.95907	4.28693	5.05845	6.72617	4.57161	6.33806	6.38522	3.17538	3.29292	4.65326
118507695	accessory gland protein Acp32CD-like, transcript variant X6	0.345735	1.06596	1.18312	0	0.538166	0.799213	1.14576	0.531253	0	2.18822	1.27694	1.19103	1.42204	0.970593	0.870829	1.04729	1.21966	0.380862	1.32417	1.06505	1.529
118507695	accessory gland protein Acp32CD-like, transcript variant X7	0.605557	0.31826	0	0.770541	0.475983	0.69862	0.730247	1.37852	0.753111	0	0.779769	0.47487	2.47422	1.22725	1.54335	0.503693	1.41268	0.957735	1.89961	1.00408	1.66903
118507695	accessory gland protein Acp32CD-like, transcript variant X8	35.6476	13.9322	24.2583	14.618	27.1835	27.6039	9.08411	27.083	10.6957	31.7897	14.391	13.9335	13.518	14.6658	21.1001	21.274	20.1904	14.6633	13.5669	14.2239	16.2983
118507695	accessory gland protein Acp32CD-like, transcript variant X9	5.55928	12.0092	6.44117	17.4928	7.68889	4.2156	15.4095	8.92934	30.8114	6.52181	24.1237	21.8096	21.8636	16.8743	20.2546	13.5984	26.964	16.0289	14.0117	22.786	10.2164
118504941	accessory gland protein Acp62F-like	0	0	0	0	0	0	0	0	0	0	0	0	0	0	0	0	0	0	0	0	0.259528
118517079	accessory gland protein Acp62F-like	0	0.424726	0	0.358289	0	0	0	0.54666	0.479271	0	0.475572	0	0	0	0	0	0	0.801016	1.29455	0	0
118504509	acetylcholine receptor subunit alpha-like 1, transcript variant X1	18.6645	16.892	35.7078	22.1541	16.1671	22.6472	21.7362	28.8769	17.5468	15.8443	16.8191	22.3423	15.4769	18.5814	16.7424	15.0192	20.2547	23.1787	14.824	9.61198	12.0035
118504509	acetylcholine receptor subunit alpha-like 1, transcript variant X2	1.66448	1.77468	2.74266	0.167051	22.7728	3.2294	2.03588	0.03544	0.044355	9.40546	3.24877	0.173248	0.654081	0.900337	0.420054	0.179455	0.00284216	0.0384471	4.17704e-06	0.0222033	6.32765e-05
118504509	acetylcholine receptor subunit alpha-like 1, transcript variant X3	24.4597	16.4502	23.7203	19.3235	26.4097	21.9352	34.4259	28.1636	16.5587	30.1739	23.507	25.729	23.825	19.4304	17.0945	25.6041	27.2351	24.0512	28.2001	26.2598	19.0823
118504507	acetylcholine receptor subunit alpha-like 2	152.361	132.503	168.264	132.651	154.758	152.855	101.421	100.212	85.3212	101.022	97.9776	95.6685	94.6653	93.4635	90.4907	91.4511	104.274	100.308	96.1061	90.2365	81.0063
118513535	acetylcholine receptor subunit alpha-like, transcript variant X1	18.4391	17.3105	43.905	30.3893	54.8056	31.1732	8.22185	5.26436	8.3654	11.6854	0.175937	4.82209	9.80733	16.7946	13.9106	11.7016	15.4223	12.4819	2.42069	6.9089	6.02423
118517327	acetylcholine receptor subunit alpha-like, transcript variant X1	0	0.041596	0	2.22671	0.049341	0.0106289	0.000850565	0.000966342	0.0102908	0.583479	2.99754	2.18946e-05	4.73622	3.48998	0.94836	0.00903371	0.553825	8.56542	0.0282367	0.000824859	0.966174
118513535	acetylcholine receptor subunit alpha-like, transcript variant X10	9.63171	13.6966	8.30763	12.4154	11.9057	11.7169	14.4246	10.3149	8.74684	14.0253	15.1828	8.56708	8.67006	7.72248	8.37257	6.70917	6.90875	12.1275	7.83604	5.14443	4.61945
118517327	acetylcholine receptor subunit alpha-like, transcript variant X10	5.20621	3.96557	4.13037	1.2083	4.75797	0.731145	5.6883	2.09663e-10	3.08192	0.663819	1.41121	6.3473	0.770994	4.20748	2.23613	1.63559	5.44428	2.95103	4.00098	4.8199	3.30651
118513535	acetylcholine receptor subunit alpha-like, transcript variant X11	4.42935	4.95211	3.84321	4.99303	5.22062	6.41159	5.65805	5.11655	3.53401	6.63424	5.86887	4.54723	4.47046	3.83148	3.12534	4.47029	3.49729	5.81104	3.00171	1.84788	3.22321
118517327	acetylcholine receptor subunit alpha-like, transcript variant X11	2.90918	3.75137	4.10429	0.716972	1.31866	3.18359	1.66294	6.67486	4.4908	2.207	4.51788	3.61775	5.46998	1.74391	2.77439	2.9918	5.70168	2.25209	4.48997	3.2254	1.21461
118513535	acetylcholine receptor subunit alpha-like, transcript variant X12	16.2504	17.1153	26.3282	19.0072	27.1107	23.825	15.6472	11.4756	15.0052	14.8983	12.654	10.621	10.6029	12.9928	12.5307	17.0009	19.8949	15.4328	23.3171	21.0673	9.93258
118517327	acetylcholine receptor subunit alpha-like, transcript variant X12	4.36377	3.0011	1.64171	2.86789	3.95599	0.795897	5.82027	1.33497	1.49693	4.414	2.25894	1.4471	4.10249	1.74391	0.924798	5.98361	0.814525	2.81512	2.69398	4.8381	3.64383
118513535	acetylcholine receptor subunit alpha-like, transcript variant X13	41.0741	45.911	31.2749	51.8599	31.3187	42.4776	60.4008	33.0534	33.1275	64.8375	52.0563	30.7975	43.6739	25.0619	23.1535	34.3351	30.7437	54.9041	33.7416	33.6161	37.7573
118517327	acetylcholine receptor subunit alpha-like, transcript variant X13	0.341188	1.31296	1.84704	1.77264	3.85893	1.04214	2.01596	4.07417	3.82838	2.73099	0	3.88238	0	0.575033	2.69271	2.14774	3.3761	0	2.13069	2.86552	1.99507
118513535	acetylcholine receptor subunit alpha-like, transcript variant X14	3.73896e-05	6.57123e-08	1.77394	3.11651	8.54809e-06	3.89438	0.00723565	4.14083	1.15571e-06	1.34326e-05	0	3.68147	1.75683	2.77554	2.08201	5.12895e-05	1.89512	9.84921e-06	0.000821323	4.64342	3.50126
118517327	acetylcholine receptor subunit alpha-like, transcript variant X14	9.24785	8.34692	15.451	3.93231	6.05827	6.32541	18.2439	15.4451	9.5008	8.0766	5.93757	5.46864	5.98467	5.74049	10.9943	7.32539	4.09595	4.48916	7.25311	7.97115	6.35221
118513535	acetylcholine receptor subunit alpha-like, transcript variant X15	1.02959	1.24042	0	0.773587	1.62853	0.821453	0.604685	0	0	0.848437	1.50799	0	0.835968	0	1.12418	0.492348	0.671869	0.639154	0.521664	0	0.5436
118513535	acetylcholine receptor subunit alpha-like, transcript variant X2	9.2211	8.38189	8.07129	6.24896	10.8801	11.11	5.51307	6.32736	3.60591	6.27693	7.61162	6.25621	4.2486	6.83348	5.14779	6.65992	8.82599	7.34875	4.49287	6.67852	4.01618
118517327	acetylcholine receptor subunit alpha-like, transcript variant X2	5.38649	4.92872	5.86149	4.4538	7.93561	4.7823	14.4512	11.23	4.35697	12.6617	6.50697	7.97598	7.52065	8.8842	6.73388	4.51438	3.26351	10.2084	5.93613	4.98382	7.59677
118513535	acetylcholine receptor subunit alpha-like, transcript variant X3	0.392748	0.759366	0.3906	0.744996	0.394556	1.07391	0.195568	0.851303	0.514646	1.62479	1.47285	0.56876	1.75153	0.529979	1.15246	1.15375	1.31811	0.434211	1.20114	0.71095	0.77748
118517327	acetylcholine receptor subunit alpha-like, transcript variant X3	20.8855	12.1078	37.3378	15.3057	32.4713	23.8791	25.057	25.1113	16.1242	28.8129	23.253	22.4493	15.9261	21.9731	23.0461	22.5433	32.9561	23.782	26.4219	20.8609	16.145
118513535	acetylcholine receptor subunit alpha-like, transcript variant X4	9.32104	2.17209	1.05375	2.15645	7.6938	3.15866	2.60081	4.44692	3.50738	1.76835	5.18154	8.03286	5.44101	6.49893	5.46781	2.10099	4.44964	3.65009	3.67712	3.88461	3.44611
118517327	acetylcholine receptor subunit alpha-like, transcript variant X4	5.00067	13.4257	13.4481	9.54594	13.6268	11.4679	13.5065	10.7233	12.9558	7.04731	12.3408	4.45451	12.9395	8.68653	4.62502	7.76054	8.70953	8.87648	5.94079	12.4181	6.7811
118513535	acetylcholine receptor subunit alpha-like, transcript variant X5	2.26031	1.06567	2.7054	3.45742	2.03126	2.20849	0.772271	0.00779088	0.142311	3.73179	1.25974	1.73331	0	2.44028	1.71819	2.45364	1.79921	0	1.36345	3.99759e-05	1.46081
118517327	acetylcholine receptor subunit alpha-like, transcript variant X5	2.33637	1.21226	1.83775	1.01321e-05	0.882769	1.86239e-08	3.53167	1.23922e-07	1.3495e-07	1.58602	0	1.12247	0	3.16694	2.93208e-08	0	3.95621	0.77518	2.59322e-09	2.68202	3.36043e-09
118513535	acetylcholine receptor subunit alpha-like, transcript variant X6	1.3511	1.18793	0.726192	1.32995	1.2525	1.56026	1.35101	1.05286	0.730256	1.19272	0.506664	0.374689	0.471739	1.12895	1.17155	0.924026	1.4045	0.572002	1.42962	1.05338	0.763212
118517327	acetylcholine receptor subunit alpha-like, transcript variant X6	0	0	0.736827	2.71348e-07	0	1.82059e-09	0	1.14819	1.17148e-09	0	0	0	0	0	1.03195e-09	0	1.27803e-08	0	0	0	0
118513535	acetylcholine receptor subunit alpha-like, transcript variant X7	0.752897	1.71402	3.26202	1.12898	2.87504	3.4714	2.96115	2.99958	1.61854	0	0.625193	1.3612	1.32999	1.77852	0.640025	0.448247	0.585436	0.540254	1.30293	2.1137	1.28431
118517327	acetylcholine receptor subunit alpha-like, transcript variant X7	0.710693	2.92849	6.66342	3.48445	6.00145	2.32788	5.68255	2.70511	3.66105	4.32243	2.20868	5.67728	2.0047	2.85047	5.39486	5.85272	6.68911	8.40983	5.37906	6.2989	1.78014
118513535	acetylcholine receptor subunit alpha-like, transcript variant X8	22.9211	17.795	16.1838	23.9817	33.8068	23.6825	13.3054	13.8964	10.0538	14.9887	13.2609	20.221	12.0184	13.065	9.98658	15.5318	13.4352	10.1601	19.8656	15.3878	11.6
118517327	acetylcholine receptor subunit alpha-like, transcript variant X8	0	0.969808	1.43681	1.01096e-07	7.68692e-05	4.89516e-09	8.23298e-10	0.12251	2.04915e-08	0	0	5.72045e-10	1.31444	5.3502e-09	0.000798898	3.8e-07	3.06781e-06	0	1.83493e-09	6.00694e-10	1.24795e-08
118513535	acetylcholine receptor subunit alpha-like, transcript variant X9	38.945	33.4434	39.6722	26.381	20.3206	30.1565	30.0967	30.2154	21.494	29.5963	29.1071	27.6991	21.6593	13.7489	14.9581	18.6447	26.498	23.7402	18.304	19.7659	15.1728
118517327	acetylcholine receptor subunit alpha-like, transcript variant X9	10.0458	10.8481	10.5133	9.41971	9.44675	8.8859	14.438	20.2391	12.485	11.9991	12.6788	11.0811	9.47921	7.61127	10.2977	9.45335	10.5041	11.8433	9.09183	11.2358	8.36524
118517656	acetylcholine receptor subunit beta-like 1	177.352	154.133	197.889	156.03	195.688	162.502	120.153	119.377	103.13	130.317	102.929	102.246	89.703	93.2023	84.7274	103.605	116.418	110.812	87.0709	93.466	78.3841
118504504	acetylcholine receptor subunit beta-like 2	146.619	145.421	150.569	142.606	143.666	163.93	104.583	105.044	91.6634	108.793	114.077	104.664	123.705	117.72	109.097	101.878	104.547	94.3633	104.724	88.774	97.2852
118511106	acetylcholine receptor subunit beta-type lev-1-like, transcript variant X1	0	0	0	0	0	0	0	0	0	0	0	0	0	0	0	0	0.334165	0	0	0.597986	0
118511106	acetylcholine receptor subunit beta-type lev-1-like, transcript variant X2	0.252356	0.244817	0.0975583	0.270341	0.387597	0.419236	0.558544	0.207014	0.0912458	0.283108	0.179673	0.100819	0.397446	0.159258	0.175323	0.144598	0	0.452923	0.40717	0	0
118511107	acetylcholine receptor subunit delta-like	0.363898	0	0	0.058432	0	0.145055	0.241485	0	0	0	0	0.174234	0.137566	0.0689233	0	0.0625517	0	0.0652704	0.0704243	0.792198	0.0602213
118504721	acetylcholinesterase, transcript variant X1	36.7547	30.6528	47.5277	38.6813	64.9423	29.2609	88.2611	65.0864	40.5474	68.3023	39.2323	47.2069	36.633	42.7914	39.1487	46.2399	47.0224	51.9432	42.9865	59.5968	39.574
118506530	acetylcholinesterase, transcript variant X1	98.8466	83.6014	136.06	81.0816	107.693	73.4694	93.7501	75.5953	61.4039	54.8499	59.528	70.0666	51.4512	41.8151	43.0965	46.0546	59.7058	53.7331	64.7896	62.7952	50.7444
118504721	acetylcholinesterase, transcript variant X2	6.69128	6.10588	6.05255	4.96187	7.04383	6.26065	8.72568	9.84934	4.04671	10.9194	8.03115	3.84901	4.26255	7.68435	9.18964	4.8429	5.38673	7.30984	5.41333	8.14774	4.47265
118506530	acetylcholinesterase, transcript variant X2	25.7893	29.445	68.7917	22.5441	47.1331	26.9816	54.3696	62.0985	27.6206	37.2988	25.0228	37.5303	26.8765	29.1342	26.5537	22.4038	35.5397	28.6515	24.9965	23.3137	16.6354
118504721	acetylcholinesterase, transcript variant X3	3.28894	2.00006e-06	5.11333	2.25273	5.51183	3.0746	2.02439	6.80664	5.35223	7.70805	9.51062e-06	6.33119	3.4644	4.34344	0.955703	6.09854	8.91407	9.11089	6.9572	7.91474	6.42545
118506530	acetylcholinesterase, transcript variant X3	1.00506	6.41008	1.61742	1.43092	0.498958	12.673	8.81942	5.69102	0.93055	6.39703	1.95567	9.35869	0.9638	2.76017	4.76349	9.43863	6.27327	2.55787	8.75892	15.7695	7.15789
118504721	acetylcholinesterase, transcript variant X4	0.00369528	1.92788	0.000229978	1.27831	2.62795e-06	0.000990867	1.03764	2.57744	0.0123003	2.52586	4.9187	0.00350923	0.013407	1.45188	0.000317943	1.03632	4.06537	0.00487724	0.0816793	0.00206894	0.195999
118506530	acetylcholinesterase, transcript variant X4	38.8893	44.8096	79.4307	29.5632	65.5559	28.529	47.4967	73.1384	33.1543	42.7615	41.4635	55.6685	37.8562	40.5697	41.6422	33.0461	44.7848	44.118	36.6046	21.5187	24.4253
118506530	acetylcholinesterase, transcript variant X5	2.51778	4.81614	5.32862	0.073209	3.58199	2.03129	6.207	0.174775	1.96025	4.00632	1.78392	2.03366	2.4757	0.00139792	1.03129	2.93115	4.5003	2.03378	0.0426496	4.94236	2.55735
118507621	acetyl-CoA acetyltransferase	26.0947	27.164	30.6598	27.2389	26.4903	32.9431	17.6068	25.1628	21.9381	19.8368	24.4524	26.3238	29.6072	28.8213	31.2925	26.8882	29.8332	25.6715	31.4106	28.5499	27.9396
118504188	acetyl-CoA acetyltransferase, mitochondrial	59.4587	61.423	60.3368	77.6681	68.1334	76.5206	85.8088	78.8111	98.7367	152.44	164.542	163.192	230.6	223.633	248.782	241.857	213.645	178.128	167.419	190.913	182.352
118509875	acetyl-CoA carboxylase, transcript variant X1	2.64898	2.5813	12.3294	2.24854	10.9647	5.56718	10.7987	14.7471	8.36047	8.21365	9.96261	11.7748	8.20468	9.84898	7.98711	6.9301	15.0121	9.59016	10.0126	15.5562	8.54212
118509875	acetyl-CoA carboxylase, transcript variant X2	11.9112	12.0272	44.0449	7.40981	42.5018	15.5939	41.2279	43.5722	13.6907	31.6985	23.5036	29.5692	29.2986	33.0397	24.1967	24.2479	40.0656	31.8167	35.988	52.9279	30.5985
118509875	acetyl-CoA carboxylase, transcript variant X3	0.963546	0.680011	1.83625	1.4083	1.80812	0.819653	5.0476	4.69189	3.96642	3.21927	2.4017	3.19291	2.79135	2.26122	3.00123	1.02897	2.18053	2.25576	1.82982	5.68107	2.18817
118509875	acetyl-CoA carboxylase, transcript variant X4	3.83974	4.81375	4.94033	6.86547	11.6303	9.01061	19.1553	10.4171	9.17159	11.7679	17.7001	20.5399	4.22065	12.2894	15.4128	4.73248	5.76519	6.42229	14.08	25.4175	19.4328
118514376	acetyl-coenzyme A synthetase	259.19	243.138	328.537	265.279	358.224	280.678	197.044	230.824	202.124	220.258	213.524	241.432	200.152	206.432	207.863	199.526	244.716	223.031	216.789	224.887	162.004
118514231	acetyl-coenzyme A transporter 1, transcript variant X1	19.7598	24.6215	27.1115	27.6384	23.936	27.5579	27.2435	28.0899	23.5356	24.1446	30.3628	26.9151	30.7935	26.8034	26.8194	28.289	24.5297	28.6422	26.1983	24.8342	28.335
118514231	acetyl-coenzyme A transporter 1, transcript variant X2	3.30402	2.14804	0	0.494798	0.752345	1.17445	1.09488	0	0	3.55304	0	0	1.21928	2.51037	0	2.28046	1.1029	2.7589	1.54538	0	0.760411
118507884	achaete-scute complex protein T4-like	0.0390588	0.189644	0.0452062	0.0625811	0.107844	0.155582	0	0.191796	0.0846539	0.61155	0.249626	0.093152	0.0738567	0.0740685	0	0.100703	0.0332218	0.0349634	0.037743	0.12675	0.0971604
118507892	achaete-scute complex protein T8-like	0.474488	0.251302	0.299601	0.414785	0.436751	0.558464	0.190542	0.105929	0.0934973	0.337783	0.275745	0.257303	0.0815612	0.12268	0.179704	0.0741426	0.146791	0.270348	0.0416891	0.186779	0.143032
118505515	acid phosphatase type 7	150.12	143.099	143.345	149.5	144.96	152.567	189.985	186.14	193.63	184.315	184.256	189.423	165.827	168.548	180.352	167.996	171.771	167.562	180.59	169.569	168.48
118514432	acid sphingomyelinase-like phosphodiesterase 3a	151.349	145.929	170.92	143.424	163.564	162.193	172.182	186.385	152.14	177.956	178.777	171.856	166.623	158.917	158.97	161.65	173.434	192.625	183.49	154.808	148.853
118506680	acidic fibroblast growth factor intracellular-binding protein	34.4352	31.5305	33.9557	30.8728	30.697	34.59	32.398	29.45	30.3395	31.8229	32.818	29.9886	32.1518	31.1679	26.1128	28.2233	27.3286	23.9666	28.1441	24.9978	30.6251
118509725	acidic leucine-rich nuclear phosphoprotein 32 family member A, transcript variant X1	0	0	0	0	0	0	0	0	0	0	0	0	0	0	0	0	0	0	0	0	0
118509725	acidic leucine-rich nuclear phosphoprotein 32 family member A, transcript variant X10	4.72784	4.56954	4.83568	4.4985	4.66009	6.90033	7.77225	8.7823	5.32123	7.24789	7.94873	10.4839	8.94125	9.44767	9.6939	4.06638	9.31348	6.99828	9.59036	6.25926	6.51993
118509725	acidic leucine-rich nuclear phosphoprotein 32 family member A, transcript variant X11	46.1432	37.0048	53.6634	43.7132	61.7425	48.0964	63.2614	63.6955	55.4704	66.778	60.4039	54.7443	54.4719	56.4681	55.7247	66.6049	72.8325	57.8209	58.727	74.8247	61.8926
118509725	acidic leucine-rich nuclear phosphoprotein 32 family member A, transcript variant X12	2.47206e-05	9.53036e-05	0.0019457	9.30058e-07	6.94072e-08	5.04062e-05	0	0	7.39959e-08	0.00305573	0	0.000354865	1.51958e-07	0.000122911	2.92607e-07	1.73447e-05	0.000774825	0.0144126	4.64966e-05	0.000456533	5.4548e-07
118509725	acidic leucine-rich nuclear phosphoprotein 32 family member A, transcript variant X13	10.5363	7.97977	11.9215	9.60007	13.239	17.8004	19.6822	15.3172	11.023	16.4532	13.2772	10.6341	15.6262	17.8819	16.6577	7.58423	16.7071	19.5961	13.6639	15.398	12.3336
118509725	acidic leucine-rich nuclear phosphoprotein 32 family member A, transcript variant X14	7.02126	9.35622	10.2499	9.13441	11.4282	8.0706	13.0083	16.0861	12.4616	15.2241	6.86198	17.1374	11.1258	12.193	11.5577	12.03	12.8117	18.1986	14.6324	12.0101	10.722
118509725	acidic leucine-rich nuclear phosphoprotein 32 family member A, transcript variant X15	1.05534	1.42502e-07	4.99281e-06	2.10343	2.65245	1.97843e-08	0	0.89897	2.97786	4.73655e-05	2.74216	4.75668	2.25977	1.87455	2.04101	1.39115	0.029579	2.85629	2.02337	2.66079	0.0739955
118509725	acidic leucine-rich nuclear phosphoprotein 32 family member A, transcript variant X16	0.383401	0.725176	0.685346	0	0.889265	0.550502	0.655453	1.07237	0.903113	1.04982	0.378079	0.48134	0.481045	0.438121	0.546601	0.514663	0.365043	0.472457	0.38099	0.481022	0.315133
118509725	acidic leucine-rich nuclear phosphoprotein 32 family member A, transcript variant X2	3.97864	4.69865	5.09484	4.97089	5.3764	4.63241	11.8155	10.9668	8.61939	8.47867	9.39451	9.56946	7.13866	5.96446	4.68086	6.60181	4.52279	7.22579	7.70802	6.11607	5.34603
118509725	acidic leucine-rich nuclear phosphoprotein 32 family member A, transcript variant X3	0	0	0	0	0	0	0	0	0	0	0	0	0	0	0	0	0	0	0	0	0
118509725	acidic leucine-rich nuclear phosphoprotein 32 family member A, transcript variant X4	0.481592	0.208109	0.809394	0.390832	0.433176	0.21233	0.878349	0.854771	0.233089	0.857686	0.870246	0.24096	1.1843	0	0	0.800107	0.66851	0.394041	0.202549	0.217111	0.347538
118509725	acidic leucine-rich nuclear phosphoprotein 32 family member A, transcript variant X5	0	0.337172	0.418915	0	0	0	0.291118	0.191593	0.331952	0.373877	0	0.422837	0.301766	1.09622	0.463621	0	0.313515	0.419608	0.337829	0.203809	0.266664
118509725	acidic leucine-rich nuclear phosphoprotein 32 family member A, transcript variant X6	0	0	0	0	0	0	0	0	0	0	0	0	0	0	0	0	0	0	0	0	0
118509725	acidic leucine-rich nuclear phosphoprotein 32 family member A, transcript variant X7	0	0	0	0	0	0	0	0	0	0	0	0	0	0	0	0	0	0	0	0	0
118509725	acidic leucine-rich nuclear phosphoprotein 32 family member A, transcript variant X8	1.22825	0.711439	1.33564	1.07193	0.834365	1.02511	1.07365	0.828332	0.715496	1.0248	0.882317	0.684141	0.473697	0.806301	1.51996	0.78149	1.56219	0.452105	1.09719	1.10861	1.01908
118509725	acidic leucine-rich nuclear phosphoprotein 32 family member A, transcript variant X9	0.197335	0	0.253453	0	0.188484	0.191638	0.168164	0	0	0	0.19714	0	0	0.232792	0	0	0.398656	0.168678	0	0	0.327385
118512832	acidic repeat-containing protein	0.0422571	0.287222	0.146745	0.0677196	0.0388953	0.420834	0.139991	0	0.22898	0.094539	0.090039	0	0.119852	0.160249	0.132033	0.181583	0.0718975	0.189165	0.122517	0	0.0700637
118511102	acid-sensing ion channel 2	0.0684088	0.0663875	0.0792815	0.219629	0.126027	0	0	0.0841075	0	0	0.145984	0.163689	0	0.194383	0.285097	0.0587946	0.058283	0.184007	0	0.0744017	0.11324
118511086	actin cytoskeleton-regulatory complex protein PAN1-like	0.963625	0.933786	2.24092	0.665981	1.39767	0.82421	1.52781	2.37836	1.19619	0.930128	0.589916	0.49795	1.17007	0.520258	0.574222	1.42016	1.17764	0.247852	0.935006	1.06179	0.794293
118517436	actin cytoskeleton-regulatory complex protein pan1-like	7.64095	9.76301	22.447	9.46892	23.6047	13.8348	22.1837	21.1263	10.3892	16.9395	18.0713	17.0456	22.1261	21.5639	18.433	16.1373	23.6783	23.1636	28.7818	25.6506	18.803
118504187	actin cytoskeleton-regulatory complex protein PAN1-like, transcript variant X1	1.00032	1.03736	0.560281	1.11529	1.03674	0.762092	1.30373	1.21369	0.831877	0.781754	1.068	1.16363	1.29944	1.14814	0.87615	0.850105	0.974978	2.76279	0.720227	0.610402	0.960481
118504187	actin cytoskeleton-regulatory complex protein PAN1-like, transcript variant X2	156.339	156.291	157.915	163.748	152.681	173.836	134.826	133.893	130.264	130.67	137.38	134.129	133.738	133.351	133.482	120.539	138.733	123.254	119.118	119.571	107.371
118504187	actin cytoskeleton-regulatory complex protein PAN1-like, transcript variant X3	0	0	0	0	0	0	0	0	0	0	0	0	0	0	0	0	0	0	0	0	0
118509720	actin, muscle	74.8094	24.4667	52.707	489.238	264.922	157.18	4.88903	0.776596	5.48017	26.5411	8.76098	17.4952	17.4871	11.2524	11.7728	8.85092	11.9409	36.1306	9.5248	94.7321	6.74789
118505225	actin, muscle-type A2-like, transcript variant X1	1.54459	0.272525	1.8716	0.237182	0	0.209884	0.543488	0.776954	0.456805	0.536759	0.14984	0.16803	0	0	0.0731511	0.301708	0.27506	0.0629556	0.135858	0.152773	0.0879075
118505225	actin, muscle-type A2-like, transcript variant X2	0	0	0	0.206361	0.312318	0	0	0	0	0.165556	0	0	0.70502	0	0	0	0.254322	0	0	0	0.0834658
118502963	actin-3, muscle-specific-like	0.0846807	0.0817798	0.0963586	0.875917	0	0.171161	0	0	0.0942968	0.281821	0	0	0	0.0776083	0	0	0.0730562	0.0753304	0	0.276107	0.0701088
118505170	actin-5C, transcript variant X1	1381.19	1525.15	1302.22	1621.59	1523.86	1621.34	967.642	1041.65	1171.36	1262.74	1382.07	1384.16	1456.18	1439.3	1511.75	1521.69	1357.95	1265.49	1476.33	1511.7	1320.53
118505170	actin-5C, transcript variant X2	1591.53	1754.02	1611.88	1373.31	1330.22	1305.45	1658.69	2178.83	1945.59	1450.49	1583.73	1611.42	1849.96	1624.64	1589.95	1581.15	1586.58	1462.25	2546.65	1842.23	1925.97
118502962	actin-87E	25.5984	8.59953	14.0763	13.6985	8.10935	10.6673	18.6085	3.03717	7.70188	8.41387	7.5769	12.7941	8.61846	3.75899	3.48745	4.69247	4.77679	15.5481	4.33256	15.241	12.2469
118509922	actin-binding LIM protein 2, transcript variant X1	0	0	0	0	0	0	0	0	0	0	0	0	0	0	0	0	0	0	0	0	0
118509922	actin-binding LIM protein 2, transcript variant X10	5.45513e-10	0	0	0	0	0	0	0	0	0	0	0	0	0	0	0	0	0	0	0	0
118509922	actin-binding LIM protein 2, transcript variant X11	6.694	10.1111	10.9121	8.47796	10.2002	12.6669	2.27618	3.97984	4.28477	0.207229	3.7983	9.27027	6.29671	4.41481	4.11132	1.3651	3.03721	3.03099	7.99932	5.1869	5.09193
118509922	actin-binding LIM protein 2, transcript variant X12	0.295134	8.35669	2.83789	8.79246	6.73443	0.340565	15.0493	9.74935	10.5295	14.159	7.36905	2.35459	10.1057	10.3154	8.47044	7.53944	11.9635	9.8682	5.00833	8.2099	3.71647
118509922	actin-binding LIM protein 2, transcript variant X13	22.4721	17.2122	27.3582	14.9275	10.2703	19.986	9.46076	17.7157	14.1828	0.307433	9.5756	33.3905	15.5525	17.3561	12.9394	1.06445	12.0909	4.36886	25.5977	6.74343	15.9618
118509922	actin-binding LIM protein 2, transcript variant X14	19.5654	21.3827	28.9568	21.3233	34.8789	22.0751	26.8369	26.7149	19.9526	31.1826	26.9059	10.7358	17.3164	16.5861	20.5249	26.6966	25.3268	24.5969	8.26216	24.7879	14.7738
118509922	actin-binding LIM protein 2, transcript variant X15	10.2178	18.6323	24.5413	11.3268	20.3671	15.358	17.0491	17.6	12.5933	14.93	15.2648	12.2518	11.6456	11.0611	12.3514	13.1634	16.9728	16.5163	17.5867	13.7536	11.7605
118509922	actin-binding LIM protein 2, transcript variant X16	0	0	0	0	0.283295	0	0	0	0	0	0	0	0	0	0	0	0	0	0	0	0
118509922	actin-binding LIM protein 2, transcript variant X17	3.15815	4.39298	4.36222	3.66568	3.92849	3.34901	5.63967	4.16996	4.06632	4.50567	4.81714	4.89087	2.25436	3.10433	3.54273	4.39723	4.69121	6.66807	2.40861	5.35325	1.89585
118509922	actin-binding LIM protein 2, transcript variant X2	0	0	0	0	0	0	0	0	0	0	0	0	0	0	0	0	0	0	0	0	0
118509922	actin-binding LIM protein 2, transcript variant X3	0.0660883	3.68795	0.851635	3.76856	4.92097	0.161848	2.67092	1.64785	2.36122	6.99265	2.18258	0.493177	3.10018	1.99086	2.03442	7.27633	2.25241	5.06577	1.16419	4.67143	0.894623
118509922	actin-binding LIM protein 2, transcript variant X4	17.701	23.6144	29.479	14.8925	24.4601	25.4884	24.8655	26.664	18.8017	12.7172	17.4405	27.8867	24.3084	18.7725	25.0659	18.3722	18.1131	18.9306	24.1536	16.2947	17.4959
118509922	actin-binding LIM protein 2, transcript variant X5	4.24063	4.94948	5.5019	2.90617	5.22888	3.54899	1.14619	4.44269	3.95988	3.29809	4.57615	2.88584	3.74276	4.81619	2.48649	1.54112	2.44776	1.17004	4.10077	0	2.41428
118509922	actin-binding LIM protein 2, transcript variant X6	4.59066	0	3.41267	1.26064	2.22743	0.631914	0.601999	1.58335	0.856575	0.704209	0.833987	1.06151	1.70382	0	1.32817	1.62743	1.03046	1.25827	0	0	0
118509922	actin-binding LIM protein 2, transcript variant X7	6.99508	1.98492	5.34793	6.88846	4.63575	2.98139	1.48637	2.89561	2.23679	4.42876	5.12099	7.44099	1.3848	2.32668	0	0.70322	3.32088	4.81365	5.84723	4.06436	3.8487
118509922	actin-binding LIM protein 2, transcript variant X8	2.25134e-08	8.69979e-08	8.32244e-09	5.06309e-07	2.55914	2.8868	0	1.27775	3.2131	1.17569	1.96801e-08	4.37518e-06	0	1.03906	0	1.7906e-10	0.859024	2.22523	2.16514e-08	2.73307	0.831275
118509922	actin-binding LIM protein 2, transcript variant X9	6.36478e-10	0	0	0	0	0	0	0	0	0	0	0	0	0	0	0	0	0	0	0	0
118509070	actin-binding protein IPP	60.6098	63.3345	63.0565	67.5397	72.3202	65.9436	72.7182	72.1739	65.3336	70.9997	66.9489	58.0519	65.0012	63.0392	66.476	64.2471	63.0496	74.5291	57.8682	62.7501	63.2795
118505646	actin-binding Rho-activating protein, transcript variant X1	0.987583	0	0.267463	0	0.000905982	0	0	0.856778	0	0	0	0	0	0.770559	0	0.00121697	0	0.519033	1.43375	1.93105	0.226901
118505646	actin-binding Rho-activating protein, transcript variant X2	3.60088	2.67407	2.28873	13.7169	5.80317	6.04107	5.99302	9.14138	6.70376	9.37369	8.92774	9.32872	6.90508	4.61004	3.86553	1.78283	2.44421	2.47726	4.38996	6.06338	7.57445
118505513	actin-histidine N-methyltransferase, transcript variant X1	10.4383	9.2219	10.7231	10.1555	11.118	12.0122	12.8131	16.5212	14.2346	17.0292	16.2041	15.5767	17.3599	17.5174	19.4374	17.9598	18.4967	19.5538	20.9735	21.4659	16.9199
118505513	actin-histidine N-methyltransferase, transcript variant X2	0	0	0	0	0.510151	0	0	0	0	0.623159	0	0	3.10465	0.60712	0	0.966159	0	0	0.630583	0	1.41903
118505851	actin-interacting protein 1	54.3223	48.0274	64.325	51.4022	64.1083	55.0065	40.2042	51.1491	33.0863	42.178	45.3282	41.0884	68.6756	60.5798	61.8406	56.5087	55.6878	55.3311	69.0874	51.9747	56.4744
118517162	actin-like	2.26266	3.02096	2.89317	2.51426	3.00631	2.88119	4.9101	4.30194	3.07745	4.10598	4.07298	3.65241	3.0162	3.72045	2.64292	2.97025	3.99374	4.77646	2.34711	1.4757	1.67987
118510127	actin-like protein 6A	31.8985	31.6176	32.3865	32.1672	34.0285	35.656	32.4832	35.2796	37.1021	40.1761	41.2348	40.9349	49.5389	43.5769	45.5909	39.3072	38.1517	41.7388	41.8725	38.62	44.398
118517085	actin-related protein 2, transcript variant X1	28.9194	26.0666	31.9118	39.4508	47.6248	31.1969	14.1525	16.3397	20.5818	27.2906	21.8607	28.4897	26.2705	25.4171	30.2595	23.8562	28.1922	29.2884	17.5188	26.6549	16.9252
118517085	actin-related protein 2, transcript variant X2	90.3865	96.7807	125.034	84.4866	108.352	88.697	118.478	99.7551	82.4252	92.0318	85.797	97.7874	92.515	97.4358	96.1664	85.4677	100.724	93.9198	99.2082	90.8147	83.1027
118517085	actin-related protein 2, transcript variant X3	44.6183	48.055	47.7691	43.8072	50.9357	58.7189	48.281	60.2348	41.9763	64.0768	66.0235	52.5629	58.2162	43.8686	36.7268	47.1726	50.1198	56.3899	60.8257	49.3436	43.1853
118509850	actin-related protein 2/3 complex subunit 1A-B	260.656	266.586	259.296	266.799	269.475	276.324	236.968	265.726	273.892	222.133	236.617	234.389	233.781	229.774	243.103	220.244	225.598	211.614	266.096	242.323	266.211
118515319	actin-related protein 2/3 complex subunit 1A-B-like	14.1401	15.6962	14.0827	16.2703	17.134	15.4575	13.2858	14.8324	18.2915	12.4875	10.1235	14.6826	15.2902	17.5002	16.9655	14.9736	12.3872	10.5888	17.9752	13.8236	14.394
118505119	actin-related protein 2/3 complex subunit 3	207.647	214.726	185.967	194.79	182.1	200.717	105.702	111.967	107.12	103.972	113.101	101.054	109.716	118.563	106.076	116.933	110.323	101.219	129.488	102.134	119.17
118507628	actin-related protein 2/3 complex subunit 4, transcript variant X1	172.104	147.045	154.356	136.666	130.908	179.238	89.1149	99.2873	115.15	108.867	115.345	103.457	116.471	101.877	108.035	99.9263	72.5415	63.5281	101.22	85.6791	75.6359
118507628	actin-related protein 2/3 complex subunit 4, transcript variant X2	8.36209	8.30422	7.59969	9.40442	9.60699	9.82374	4.39144	3.982	5.44315	5.51027	4.51574	5.45326	4.3445	4.62922	4.46598	5.01684	4.3018	5.39171	4.40122	3.52833	4.24543
118507628	actin-related protein 2/3 complex subunit 4, transcript variant X3	6.99677	34.6419	15.2036	10.4397	16.4209	8.35701	3.45547	8.60614	0.00605513	7.05025e-06	0.00208313	0	3.76596e-05	7.4632	0.0852914	0.584054	14.3483	35.285	0.425926	0.180941	22.9899
118507628	actin-related protein 2/3 complex subunit 4, transcript variant X4	6.99677	3.85752	0.0136785	23.5099	16.4209	0.495932	3.45547	1.18816e-05	0.151912	4.45807e-05	0.00953264	4.21113	0.00188	0	6.63076	20.1498	20.4145	3.68119	24.4087	28.8067	11.1922
118513516	actin-related protein 2/3 complex subunit 5-C, transcript variant X1	284.329	279.588	257.408	275.449	246.168	268.137	149.726	197.721	166.276	170.26	178.254	171.58	166.934	165.386	179.209	176.328	158.201	165.59	172.289	159.65	165.337
118513516	actin-related protein 2/3 complex subunit 5-C, transcript variant X2	55.1436	63.6647	49.3285	44.93	51.0177	50.7438	53.9121	23.9596	61.2605	40.3406	47.2315	42.8363	37.7506	45.2962	38.6874	57.0299	43.3205	41.4319	43.768	43.5928	46.6972
118509710	actin-related protein 3	158.313	147.916	146.099	146.179	149.238	151.146	96.1097	105.918	96.6233	97.6516	105.324	95.1858	106.493	99.0782	101.941	96.6689	96.944	97.3838	110.547	88.3352	99.9618
118511444	actin-related protein 6	3.99904	5.52085	4.86632	5.79408	6.79506	6.29861	4.65386	6.02047	4.88193	5.5489	7.62765	6.45953	8.45604	5.34547	6.69687	8.87827	4.47453	7.62625	7.79527	6.42784	8.13815
118517507	activating signal cointegrator 1	11.7399	12.8183	10.791	15.2848	19.3182	17.0007	12.3172	13.7498	10.6574	19.2713	20.319	16.6015	22.9385	21.2311	21.7202	20.4521	16.7654	19.7026	20.818	17.8749	22.2288
118512096	activating signal cointegrator 1 complex subunit 1	15.7785	17.7452	16.2904	15.1177	14.9412	18.0618	16.984	15.0435	17.9628	19.3581	15.6498	12.2646	15.4832	17.4789	14.456	15.3498	12.274	17.4295	16.8714	14.6648	19.8536
118506078	activating signal cointegrator 1 complex subunit 2	19.5494	20.8557	21.5272	19.8377	21.1082	21.8754	25.3995	28.6124	22.6711	25.828	24.7212	23.8757	25.0015	23.3569	21.4439	21.5847	21.5938	23.5842	24.5665	22.2365	21.8416
118508423	activating signal cointegrator 1 complex subunit 3	4.89213	5.65313	10.1235	5.48739	10.3698	6.65547	10.9807	11.5169	6.75658	10.229	9.85282	9.53536	11.3201	11.277	10.0356	8.93074	10.9044	10.8296	13.6229	11.7826	9.97639
118505665	activating transcription factor 3-like, transcript variant X1	0.746948	0.432559	1.09683	1.01096	0.506041	0.42515	1.17865	1.28371e-06	0.356494	2.17743	0.125904	3.14169	2.73104	0.00022651	1.11035	1.07448	0.415664	1.28168	0.00325273	5.62143e-05	0
118505665	activating transcription factor 3-like, transcript variant X10	1.28348e-08	0.0755898	0	0	0.000381015	0	0	1.19304	0	1.08379	0	0	0	1.05772	0	0	0	0	0	0	0.393166
118505665	activating transcription factor 3-like, transcript variant X11	0.435182	7.61515e-09	0.590773	0.144097	0.54196	1.46925e-06	0.220605	1.76917e-09	0	0	0	5.95953e-09	1.38276e-10	0.0997114	0	1.45761e-09	0	0	0	0.864715	0
118505665	activating transcription factor 3-like, transcript variant X12	0.384762	7.66849e-10	0	8.1465e-05	4.30525e-05	0.424077	5.72474e-07	3.38479e-08	0	0	0	0	0	0.203693	0	0.646174	0	0	0.620029	0.42415	0
118505665	activating transcription factor 3-like, transcript variant X13	1.89031e-09	0	0.0629046	0	0	4.09015e-10	0	0	1.1265e-07	2.03239e-08	0	2.88343e-08	3.33293e-08	0	0.595942	0	4.27522e-06	1.55425e-09	0	0.390656	0
118505665	activating transcription factor 3-like, transcript variant X14	2.24302	1.66414	2.39239	1.65322	1.99727	1.86703	3.43577	4.93057	1.76662	5.8416	5.18425	5.1637	4.1839	2.10771	4.00685	2.10756	4.51706	3.83052	3.10867	2.56092	3.87116
118505665	activating transcription factor 3-like, transcript variant X2	0.37668	8.08008e-08	0.000108656	1.26075e-05	0.751104	1.24108	0.917144	1.93976	0.735308	0.780149	2.66437	0.406607	8.4267e-09	2.32957	0.0198551	0.597302	0.877331	0.69416	2.295	1.95968	2.09291
118505665	activating transcription factor 3-like, transcript variant X3	0.339026	0.765411	0	0.000846558	0.490903	0.321233	1.53096e-05	7.43794e-07	1.1918	0.330843	6.82385e-08	9.62818e-07	1.23827e-09	4.7236e-05	0.645203	0.543464	1.22137	0.621738	0.00247995	0	0.0457694
118505665	activating transcription factor 3-like, transcript variant X4	0	9.19107e-08	0.000727556	0.353437	0.183967	0.341762	0	2.45438e-10	0.86454	0	0	0	5.54915e-08	0	0.241115	0	0	0	0	0	0
118505665	activating transcription factor 3-like, transcript variant X5	0	1.09548	0.49487	0.158348	8.2362e-10	7.27983e-10	0	0	0	0	0	0	0	0	0.00222418	0	0	1.81744e-10	0	0	0
118505665	activating transcription factor 3-like, transcript variant X6	0.400937	5.76266e-08	0.494395	1.34643e-08	0.00039348	9.61751e-06	0	1.66555e-07	0	0	1.79707	0.51519	0.939223	0.000671149	0.443906	0	2.26674e-09	0	0	0.658541	0
118505665	activating transcription factor 3-like, transcript variant X7	0	0.111444	9.22356e-09	9.26453e-05	0.177603	3.68624e-06	0	0	0	0	0	0	0	0	0.128305	0	0	1.66069e-10	0	0	0
118505665	activating transcription factor 3-like, transcript variant X8	1.17999e-09	0	0	0.322904	4.44136e-05	0.62611	0.296391	6.4008e-08	0	0	0	0	1.47401e-05	1.25934	0	0.165554	8.60954e-10	0	0.62831	9.68799e-07	0
118505665	activating transcription factor 3-like, transcript variant X9	1.40879e-08	0.754019	0	1.93349	0.589633	1.71997	0.583973	4.60927e-09	0.947643	6.17942e-08	5.05213e-09	1.01193	3.61395e-10	0.519404	0	0.770697	0	0	0	0.00114706	0.0480639
118511539	activating transcription factor 7-interacting protein 1, transcript variant X1	15.6819	18.6263	18.7128	16.5792	14.1594	15.1227	14.5906	18.0318	10.7833	17.0338	11.1708	11.2993	12.7354	7.76244	10.1253	13.895	15.4166	20.0157	18.7303	17.3629	10.9004
118511539	activating transcription factor 7-interacting protein 1, transcript variant X2	16.4519	17.0471	20.4916	16.9471	24.194	17.2888	33.8068	33.6958	32.5124	35.3475	34.6525	32.1082	38.2899	37.8801	35.6068	33.4246	36.496	35.4661	30.9839	30.9565	28.9989
118506029	activator of 90 kDa heat shock protein ATPase homolog 1	91.2484	95.4092	96.9269	106.257	108.518	93.5203	61.6624	68.1042	76.5297	63.5599	68.5565	60.2477	57.8755	66.6671	74.6577	70.3912	72.0678	84.9196	67.1729	57.9541	61.9883
118508235	active breakpoint cluster region-related protein, transcript variant X1	8.22683	8.15803	15.3524	7.55285	13.8392	8.30303	15.3125	17.3494	8.82085	14.1756	10.6217	12.0605	10.294	12.0655	11.6493	12.6033	15.6751	14.465	12.451	12.7664	9.49361
118508235	active breakpoint cluster region-related protein, transcript variant X2	12.0077	7.57041	16.744	10.9191	15.3503	7.003	8.87761	10.1458	7.17202	3.69355	3.96014	6.88248	4.83199	7.86349	7.32697	8.89559	4.91948	7.39512	5.07589	6.66894	2.75353
118508235	active breakpoint cluster region-related protein, transcript variant X3	17.152	12.3226	18.0596	13.3163	22.5245	17.655	16.8921	12.3716	12.0388	11.7307	12.5985	10.1614	8.54042	9.46422	10.7129	8.62256	14.485	14.4383	3.21353	10.9103	12.8682
118508235	active breakpoint cluster region-related protein, transcript variant X4	9.13729	16.694	9.7258	7.13031	5.01164	9.19088	2.26722	6.62171	6.16282	5.846	6.64062	5.45571	11.8223	5.10769	5.75306	4.5817	7.69361	7.26978	10.0418	5.5637	6.9144
118508235	active breakpoint cluster region-related protein, transcript variant X5	0	0.559634	0	2.04139e-06	0	0	1.11751e-09	1.51724e-09	5.07149e-07	1.00799e-07	2.01206e-05	0	2.57864e-07	2.0346e-06	6.96925e-09	2.00677e-07	0.647726	8.24623e-06	1.25813	4.13858e-10	0.00585028
118510149	activin receptor type-1, transcript variant X1	41.8813	37.57	36.0495	34.6426	33.2241	38.3614	43.1377	47.9845	39.342	49.7097	47.0846	41.9291	39.9165	45.6648	39.3169	39.6814	34.9859	37.4961	39.9669	34.2383	42.9424
118510149	activin receptor type-1, transcript variant X2	13.5781	8.24734	15.0097	15.5108	10.4653	14.0115	23.9436	11.5771	16.8597	13.3737	15.3384	11.9691	19.5558	13.8966	11.8055	12.474	12.3768	14.245	10.1443	12.7606	11.9078
118510149	activin receptor type-1, transcript variant X3	6.10828	5.01399	3.59848	3.596	2.16803	3.39553	8.03991	5.53351	2.89284	3.04477	6.86706	5.96542	8.91858	4.23112	5.62669	6.72224	7.92066	5.01841	8.29609	9.72722	5.02994
118510149	activin receptor type-1, transcript variant X4	0	0	0.995295	1.10234e-09	0	0	0	0	0	0	0	0	0	0	0	0	0	0	0	0	0
118510149	activin receptor type-1, transcript variant X5	10.5335	7.43012	7.14616	6.97458	10.1369	10.4809	17.8609	17.8556	11.0395	14.0577	15.1107	15.7326	15.1088	9.30435	11.27	8.96932	10.5651	15.2868	12.7547	7.5922	12.2245
118510149	activin receptor type-1, transcript variant X6	0	0.634462	0	0	0	0	0	0	0	0	0	0	0	0.488404	0	0	0	0	0	0	0
118510149	activin receptor type-1, transcript variant X7	0	1.56576	0	0	0.960945	0	0	0	1.04314	1.74194	0	0	1.47003	0	0	0	0.707773	0	1.04208	0.868221	0
118517492	activin receptor type-2A	30.4614	26.599	35.8358	33.3421	38.6444	34.5759	46.2073	40.8086	35.824	45.4892	41.4561	41.734	42.3736	41.4502	41.67	44.0571	46.6496	44.9436	40.5909	41.9702	39.6616
118508094	acyl carrier protein, mitochondrial, transcript variant X1	52.756	52.322	50.3274	50.9365	55.2337	53.4802	31.8466	42.8749	47.2607	36.9392	47.1073	42.8388	33.9405	44.144	34.6262	31.6399	35.1835	33.4423	41.3298	32.2583	40.8818
118508094	acyl carrier protein, mitochondrial, transcript variant X2	633.974	571.798	553.611	576.696	460.856	563.72	387.954	461.193	436.498	400.889	453.298	427.112	434.428	381.43	407.781	393.522	370.106	337.86	404.818	331.201	398.718
118508094	acyl carrier protein, mitochondrial, transcript variant X3	234.991	260.994	241.408	241.815	196.456	226.267	180.544	175.678	203.289	153.507	159.982	167.552	143.289	171.643	158.253	141.97	141.442	146.186	134.287	126.561	145.38
118505116	acyl-CoA Delta(11) desaturase, transcript variant X1	279.363	241.62	381.792	259.892	358.32	359.272	408.77	550.035	430.322	463.998	509.887	551.272	566.942	566.352	533.504	407.212	435.491	361.749	455.071	402.75	461.361
118506795	acyl-CoA Delta(11) desaturase, transcript variant X1	55.1407	47.7243	46.4802	71.8625	76.3825	66.3485	0	0.519983	2.78883	3.0677	2.78186	1.29962	1.14965	0.369582	1.93727	1.42244	1.82511	6.05778	3.12952	24.3801	0.935399
118506815	acyl-CoA Delta(11) desaturase, transcript variant X1	0.277937	0	0.179698	0	0.280181	0.127424	1.04135	0.449721	0	0.804322	0.598618	1.21453	0.279157	0	0.413038	0.365702	0.354749	1.28595	0.616355	1.5261	0.208234
118505116	acyl-CoA Delta(11) desaturase, transcript variant X2	197.814	150.747	271.54	174.409	239.52	256.672	179.448	265.568	162.451	171.246	199.559	212.158	246.69	240.614	235.79	158.694	197.75	135.05	253.848	187.068	228.634
118506795	acyl-CoA Delta(11) desaturase, transcript variant X2	30.4901	14.9331	23.2613	21.1948	23.8177	19.2805	1.1335	0.84646	1.09865	0.660929	0.361352	2.45679	1.01029	0.870961	0.340094	0.49767	0.58716	0.777879	0.828614	4.68239	0
118506815	acyl-CoA Delta(11) desaturase, transcript variant X2	0	0	0	0.201186	0.332842	0.161862	0.45083	0.308446	0	0.280809	0.53513	0.184329	0.240249	0.436393	0.297143	0.125715	0	0	0	0.270382	0.399962
118505116	acyl-CoA Delta(11) desaturase, transcript variant X3	61.0864	58.6504	61.9893	60.279	49.2352	79.7502	197.051	248.634	218.413	219.846	222.228	187.659	220.853	215.894	243.567	184.453	228.687	172.149	95.6517	108.108	92.8545
118506795	acyl-CoA Delta(11) desaturase, transcript variant X3	0	0	0	0	0	0	0.136043	0	0	4.58282e-07	0	0	0	0	0	6.70178e-10	0	0	0	0	0.803496
118506815	acyl-CoA Delta(11) desaturase, transcript variant X3	0	0.175723	0.0863964	0.088906	0	0	0	0.307993	0.490381	0.0979573	0.374773	0	0	0	0	0	0	0	0.185186	0.0522428	0
118505116	acyl-CoA Delta(11) desaturase, transcript variant X4	53.2297	80.9455	105.827	65.202	107.867	35.309	79.6756	39.5063	14.0832	58.32	55.5781	34.5091	15.5146	29.4424	24.4128	129.743	103.654	182.429	93.9171	115.746	7.94595
118506832	acyl-CoA Delta(11) desaturase-like	10.6922	1.80496	2.75986	8.01687	12.4145	4.39965	0.44955	0.785472	0.503981	1.30147	0.433758	2.986	0.164784	0.0550597	0.363208	0.199767	0.346354	0.885217	1.51728	12.3005	0.52939
118506814	acyl-CoA desaturase, transcript variant X1	2.76461	3.51292	0.522011	4.49272	5.17361	5.77853	11.4695	8.67399	10.4977	11.4716	11.1524	14.1947	9.4021	15.0032	14.9147	13.179	11.1122	7.1288	8.12596	4.27235	18.3703
118506814	acyl-CoA desaturase, transcript variant X10	0	0.673779	0.800987	0.525945	1.45571	0	0.579311	0.677622	0.635205	0	1.24532	0.683898	0.655757	1.88958	0	0.853535	0.531504	0.619128	0.560119	0	2.28854
118506814	acyl-CoA desaturase, transcript variant X11	0	1.12829	2.37631	0.000289466	0	5.79594e-09	0	0	0	1.34598	0	0	4.86352	0.00161454	1.42631e-06	0	8.09058e-10	1.80084	0	0.00246265	0
118506814	acyl-CoA desaturase, transcript variant X2	0	1.12829	2.37631	0.000289466	0	5.79594e-09	0	0	4.17626	1.34598	0	0	4.86352	0.00161454	1.42631e-06	0	5.90326e-07	1.80084	3.48124	0.00246265	2.24234
118506814	acyl-CoA desaturase, transcript variant X3	15.0248	8.10882	5.94177	10.0371	4.2258	20.4637	15.5348	22.4965	23.4199	23.6544	42.2319	28.0835	9.39552	23.5039	8.32867	19.7729	12.794	9.04798	11.9776	21.8954	27.8214
118506814	acyl-CoA desaturase, transcript variant X4	0	0	0	0.635978	0	0	0.723079	1.97485	0	3.53773	0	2.93604	0	0	0	0.584785	0	0.891842	0.597241	0	1.86201
118506814	acyl-CoA desaturase, transcript variant X5	0	0	7.77957	5.86454	8.24863	3.92011	7.62357	8.03692	8.34074	11.5008	9.69431	12.714	4.57609	2.08645	16.1949	5.41832	4.86043	0	5.37937	4.19592	6.58278
118506814	acyl-CoA desaturase, transcript variant X6	0	0.153767	0.34494	4.11783e-05	0	7.59229e-10	0	0	0	0.152923	0	0	0.692868	0.000238223	4.2752	0	0	0.211668	0	0.000296109	0
118506814	acyl-CoA desaturase, transcript variant X7	0	0	0	3.45384e-08	0	1.92145e-05	0	0	0	0	0	2.61954	3.08776	0	7.94012e-10	0	1.10795	0	2.44347	8.64658e-06	0
118506814	acyl-CoA desaturase, transcript variant X8	0	0.728697	0.28875	0.587846	0.412871	0.710957	1.48209	0.84168	0.50794	1.39377	1.74404	0.829325	0.2364	1.40106	1.00067	1.31561	0.408459	0.223222	0.450705	0	1.13999
118506814	acyl-CoA desaturase, transcript variant X9	0	0.416362	0.905017	0.000109135	0	2.09688e-09	0	0	0	0.453491	0	0	1.83499	0.000619944	4.47183	0	0	0.617136	0	0.000853577	0
118505186	acyl-CoA synthetase short-chain family member 3, mitochondrial, transcript variant X1	0.661894	0.471916	1.51094	0.565379	1.20694	0.916304	0.855774	1.22315	0.545584	0.994573	0.995556	0.765197	0.244473	0.0960213	0.51047	0.508028	0.98138	0.629886	0	0.467449	0.298133
118505186	acyl-CoA synthetase short-chain family member 3, mitochondrial, transcript variant X2	0	0	0	0.224706	0	0	0	0	0	0	0	0	0	0.417063	0	0.346343	0	0	0.479313	0.426754	0
118505749	acyl-CoA:lysophosphatidylglycerol acyltransferase 1-like, transcript variant X1	10.1412	11.5368	17.7799	10.4033	18.2854	13.3826	19.2648	18.0832	13.5205	15.3189	13.9326	16.5226	14.4049	15.4167	14.6774	13.9341	19.4943	15.9762	25.5554	21.2083	11.9654
118517022	acyl-CoA:lysophosphatidylglycerol acyltransferase 1-like, transcript variant X1	20.661	23.8242	35.7888	21.0785	39.8382	27.9873	41.8889	36.6545	28.8174	33.664	28.7354	33.3817	29.2592	30.947	29.6343	28.4709	39.8597	34.7003	28.6252	45.4335	24.1354
118505749	acyl-CoA:lysophosphatidylglycerol acyltransferase 1-like, transcript variant X2	1.02371	1.91082	2.3613	1.68727	2.19692	1.31535	2.38401	4.20636	2.54471	2.71387	3.45743	2.52343	1.7666	2.82532	3.89333	1.62922	1.90098	1.83407	5.24831	1.87679	2.35521
118517022	acyl-CoA:lysophosphatidylglycerol acyltransferase 1-like, transcript variant X2	2.0845	3.94378	4.75047	3.41681	4.78355	2.74926	5.18063	8.52162	5.42063	5.96028	7.12681	5.09552	3.58635	5.66843	7.85659	3.32709	3.88478	3.98121	5.87339	4.01821	4.74817
118505749	acyl-CoA:lysophosphatidylglycerol acyltransferase 1-like, transcript variant X3	0.61797	0.563917	1.12496	0.608327	0.727829	0.318608	0.60909	1.21987	0.349904	0.408762	0.378778	0.131011	0.358974	0.605607	0.122466	0.492187	0.841493	0.399254	1.78872	0.365741	0.4683
118517022	acyl-CoA:lysophosphatidylglycerol acyltransferase 1-like, transcript variant X3	1.26351	1.16876	2.27236	1.23693	1.59191	0.668776	1.32955	2.48144	0.748614	0.901827	0.78405	0.265626	0.731737	1.21992	0.248136	1.00927	1.72677	0.870554	2.00192	0.786514	0.947932
118505749	acyl-CoA:lysophosphatidylglycerol acyltransferase 1-like, transcript variant X4	0.454525	0.53897	1.62249	0.821087	1.12693	0.515084	0.596493	1.94983	1.65321	0.95166	1.48644	1.0468	1.46069	1.43284	0.973749	0.968579	1.18887	0.486581	1.80285	0.838887	1.72567
118517022	acyl-CoA:lysophosphatidylglycerol acyltransferase 1-like, transcript variant X4	0.936734	1.12612	3.30305	1.68276	2.48635	1.09013	1.3134	3.99771	3.56701	2.11814	3.10182	2.13916	3.0011	2.9088	1.9885	2.00204	2.45916	1.07019	2.02023	1.81945	3.52051
118505749	acyl-CoA:lysophosphatidylglycerol acyltransferase 1-like, transcript variant X5	0	7.37293e-06	0.0475072	0.246795	9.60509e-05	0	3.57486e-10	0	0	0	0	0	0	0	1.97545e-08	0	0	0.00254545	0.0128116	0.000508759	0.457396
118517022	acyl-CoA:lysophosphatidylglycerol acyltransferase 1-like, transcript variant X5	1.21194	1.64633	1.74057	1.28896	1.43341	1.18489	2.27025	2.34757	1.76366	2.38982	2.21322	2.58922	2.52203	1.81951	2.00379	1.30943	2.17153	2.05162	2.29504	1.34144	2.10583
118505749	acyl-CoA:lysophosphatidylglycerol acyltransferase 1-like, transcript variant X6	1.21194	1.64633	1.74057	1.28896	1.43341	1.18489	2.27025	2.34757	1.76366	2.38982	2.21322	2.58922	2.52203	1.81951	2.00379	1.30943	2.17153	2.05162	2.29504	1.34144	2.10583
118517022	acyl-CoA:lysophosphatidylglycerol acyltransferase 1-like, transcript variant X6	0.595684	1.92445	1.96841	2.74755	2.50562	1.67669	5.10236	3.43985	3.15101	4.42043	4.37355	2.56443	4.1965	2.34094	3.21278	2.04364	1.73312	2.9372	1.16529	3.21385	2.24718
118503276	acyl-CoA-binding domain-containing protein 5, transcript variant X2	3.60832	1.69849	3.09626	4.0539	2.58759	1.40737	2.85018	2.98828	3.75128	2.6762	1.99367	4.48886	1.89773	1.38181	2.99415	1.7179	2.04743	2.89104	1.80515	3.50327	1.62262
118517488	acyl-CoA-binding domain-containing protein 6	142.567	138.402	174.286	141.692	155.091	150.836	130.098	143.162	134.764	132.282	131.866	144.896	137.929	143.164	152.076	131.661	139.54	124.125	162.56	143.96	158.779
118512034	acyl-CoA-binding protein homolog	250.164	238.208	214.083	215.098	188.518	231.639	195.407	212.437	224.167	186	186.743	199.247	193.596	199.111	194.049	208.124	178.503	179.536	216.962	173.694	192.927
118512992	acyl-CoA-binding protein homolog, transcript variant X1	8.56797	7.25523	10.3698	11.0767	4.99196	6.97882	23.3543	25.8964	31.8321	29.374	17.6942	23.4017	30.1615	25.8588	26.0622	40.1122	26.9231	21.3736	15.8599	31.7363	26.0725
118512992	acyl-CoA-binding protein homolog, transcript variant X2	17.2538	11.8831	10.8776	15.7813	14.1159	24.5174	58.7364	38.0069	42.3982	42.6822	39.3353	49.603	52.9783	42.3182	44.1259	76.8736	51.6137	40.5972	26.7683	54.0188	61.1641
118510224	acyl-coenzyme A thioesterase 13-like	68.783	62.4147	60.517	57.7772	41.8607	61.0525	46.3807	44.8692	51.7792	46.9103	52.9473	52.1395	57.0214	50.2886	51.485	54.4672	47.8633	49.5302	63.623	49.7765	55.6169
118508384	acyl-coenzyme A thioesterase 9, mitochondrial-like, transcript variant X1	3.76457	0.683356	4.4286	1.85535	2.40321	5.15847	7.95086	2.86536	5.6993	6.58397	7.3811	2.22472	6.46333	4.93278	3.96643	4.60811	2.25819	3.27824	4.08503	1.33945	2.307
118508384	acyl-coenzyme A thioesterase 9, mitochondrial-like, transcript variant X2	71.6429	71.1185	71.3606	65.0276	68.4167	68.8546	41.8788	56.9727	45.4272	42.6308	44.3921	52.8086	47.124	48.0769	48.3836	42.0562	47.1057	42.2644	54.2069	47.1725	51.5388
118511485	acylglycerol kinase, mitochondrial	52.2124	45.6144	48.3642	48.2393	45.8934	50.0654	37.9748	37.5514	39.9846	36.8308	40.7738	36.8823	40.1025	39.5868	38.7112	38.8269	36.8743	37.165	38.467	39.6578	38.4343
118508518	acylphosphatase-2	108.109	104.453	85.2961	101.913	93.8032	93.9031	108.214	101.665	109.016	98.7822	98.5532	92.6883	94.9994	98.7967	90.9989	105.458	87.6587	98.6958	95.8938	92.0979	96.6335
118509164	acylphosphatase-2, transcript variant X1	5.23083	0.546908	0.256093	10.9102	2.66158	3.03459	3.17154	0.601542	7.71549	8.16181	3.61082	9.53778	1.69695	2.36548	0.263928	2.86963	1.49277	3.31471	1.92526	14.0023	4.69745
118509164	acylphosphatase-2, transcript variant X2	0	0.360293	0.361659	0	0	0	1.0101	1.05728	1.37373	1.18911	1.43689	0	0	0	0.794503	0.188726	0.886574	0.324133	0.335158	0.47207	1.32026
118506578	acylpyruvase FAHD1, mitochondrial, transcript variant X1	0.649757	1.19798	1.16033	0.492285	0.945849	1.08744	0.578125	0.283064	0.635346	0.846045	0.883411	0.803146	2.27281	1.60182	2.12834	3.2662	1.79936	2.47535	0.275417	0.905065	1.4826
118506578	acylpyruvase FAHD1, mitochondrial, transcript variant X2	5.18537	6.12687	4.55436	4.02458	3.63841	5.8075	3.84529	3.68216	4.89275	7.00413	7.47466	5.62651	20.0047	22.6329	23.9902	34.0735	23.2049	20.9459	3.99155	8.91924	5.66638
118502845	ADAM 17-like protease	50.3429	49.7822	78.7527	48.6037	78.6348	55.2559	80.0812	75.4228	62.4193	67.9677	64.338	69.2766	65.932	73.472	72.6252	68.3375	69.5998	63.0689	73.0932	78.0815	65.4039
118510715	adapter molecule Crk, transcript variant X1	66.4337	75.1562	96.8721	74.9094	91.9961	67.188	108.185	106.854	91.8135	82.0225	66.7484	76.831	77.2021	72.5045	74.6775	74.6934	87.7905	73.5243	81.7902	83.0222	67.3759
118510715	adapter molecule Crk, transcript variant X2	16.9725	11.4569	13.5989	9.82127	21.5171	21.0473	12.6642	15.2217	15.2869	17.421	17.9319	14.6874	11.951	18.4774	12.2321	19.5428	18.6117	23.5719	19.7295	15.81	12.8094
118513133	adenine phosphoribosyltransferase	26.0689	29.3474	23.006	24.4984	23.9467	25.9019	21.2264	18.7602	20.6293	21.4252	20.134	20.3334	23.0854	20.6438	21.8695	20.1511	14.1193	20.6695	24.5999	18.9496	23.5921
118516632	adenomatous polyposis coli protein-like	5.71189	6.10986	9.97107	5.88973	13.9751	6.0335	10.8213	9.8857	5.00803	9.76659	7.72856	6.55797	8.02031	8.30743	10.1762	8.91366	8.63941	6.73434	8.42985	11.248	7.13501
118508272	adenosine 3'-phospho 5'-phosphosulfate transporter 1	64.5271	64.799	70.3002	57.236	60.9021	61.4474	41.1959	43.3081	39.4696	41.6827	41.7698	39.7081	42.7027	38.4624	39.3574	41.516	36.5124	38.6636	37.8042	36.0333	36.7452
118509838	adenosine 3'-phospho 5'-phosphosulfate transporter 2	29.6142	28.9491	25.7675	24.4224	24.9246	27.5443	25.4755	24.4592	24.3445	27.2139	28.5633	27.7468	31.9269	29.6374	26.7425	26.835	22.8072	25.3132	32.194	24.5955	27.9523
118512667	adenosine deaminase 2-like	14.2847	12.047	12.5914	9.60363	10.2165	10.448	5.54655	7.41663	5.48223	5.56569	7.45882	7.3039	8.2461	9.85425	10.7424	7.02051	7.28524	6.06834	9.5552	6.02955	7.40985
118511929	adenosine deaminase 2-like, transcript variant X1	0	0.444828	0	0	0.801324	0	1.18781	0	0	1.08881	0	0.855886	0	0.87341	0	0	0	1.46753	0.370478	0	0
118512666	adenosine deaminase 2-like, transcript variant X1	30.1165	31.2661	32.4867	24.8623	23.8017	29.1403	27.2402	36.376	33.7377	26.4449	33.6029	32.5267	58.9451	53.6192	51.4212	46.288	46.4407	37.4428	34.0595	28.8743	29.4322
118511929	adenosine deaminase 2-like, transcript variant X2	0.47591	0.259255	0.18372	0.593598	0	0.737427	0	0.259845	0.802487	0	0.620075	0	0.999733	0	0.66098	0.590797	0.765204	0	0.486477	0.745494	0.744745
118512666	adenosine deaminase 2-like, transcript variant X2	0.851009	1.76976	1.07957	0.943123	0.460498	0.634081	1.51636	1.01885	0.732097	1.85556	2.89149	1.71945	1.1056	1.47199	1.08522	1.68574	1.51232	1.70427	0.994064	1.19515	1.1256
118511547	adenosine deaminase-like protein	4.8177	5.70048	4.69605	5.34592	4.26364	6.05228	5.97509	5.45734	6.89999	4.54385	5.14885	6.70728	7.10097	6.83782	5.02148	5.54872	4.44002	5.10501	4.75958	6.63656	7.32424
118511109	adenosine kinase	34.7974	32.3378	36.0782	33.7196	34.4064	36.5405	27.9273	29.1593	27.767	31.555	33.3936	31.8314	33.971	31.2967	34.7635	28.4845	26.2276	26.4773	33.6497	29.6556	32.2702
118508110	adenosine kinase 2	17.0157	17.839	17.0806	17.2738	14.9704	16.1212	7.56365	9.02822	8.23976	12.4523	11.2683	11.8412	18.0843	13.6938	15.6264	15.817	12.5541	13.9334	15.3793	12.7692	15.7678
118510610	adenosine receptor A2b	1.42445	1.05987	1.4732	1.02366	0.613931	1.08679	1.50475	1.56158	0.75857	1.05001	1.25841	1.41265	1.08834	0.660622	0.725304	0.833655	0.489509	1.05872	1.05462	0.654299	0.579931
118517471	adenosine receptor A2b	3.97052	4.95593	4.18005	2.52192	2.27882	3.33862	6.95029	6.77772	5.64538	5.71416	5.00189	5.72657	6.19069	5.66896	5.31752	4.69758	4.74017	3.64905	5.43402	3.96943	4.74233
118508283	adenosylhomocysteinase	36.8512	42.2929	43.1897	53.8332	52.7358	58.8769	39.5851	45.8166	42.0739	66.0554	73.8486	80.873	85.8966	84.1277	81.0473	78.3126	77.3918	68.6843	96.4631	87.0201	84.4083
118507292	adenosylhomocysteinase-like 1, transcript variant X1	12.6654	10.99	13.8231	10.3918	21.6631	11.6673	20.0725	23.35	22.4899	22.4578	12.6368	17.7587	12.9922	14.3782	14.1282	15.4098	18.4624	22.0699	10.2894	14.9602	11.8317
118507292	adenosylhomocysteinase-like 1, transcript variant X2	13.2546	20.3802	23.8654	13.5649	14.47	15.441	26.8574	33.7019	32.7944	29.3772	30.5296	39.3674	20.2353	15.0812	17.4862	13.2583	14.2396	15.5089	19.6379	17.5226	15.7553
118507292	adenosylhomocysteinase-like 1, transcript variant X3	9.00033	10.0927	14.8277	4.67406	14.6037	7.92726	9.10096	9.24858	10.8924	2.063	8.75085	9.52831	8.51999	12.4643	9.05048	0.193932	11.4976	9.08866	11.1828	11.9091	6.556
118507292	adenosylhomocysteinase-like 1, transcript variant X4	5.08531	2.71883	7.18915	3.80707	7.27522	5.79973	14.6432	11.0542	3.77924	10.2569	6.06184	8.30782	5.52334	6.62234	6.18582	6.41737	5.39841	9.57697	6.94431	7.83956	6.24255
118507292	adenosylhomocysteinase-like 1, transcript variant X5	6.56461	7.80626	13.3365	9.73764	11.0828	11.4856	18.0641	18.0941	10.1053	14.8138	14.0224	15.7747	7.03212	9.14504	10.7384	10.1277	10.2008	7.4079	11.9439	11.0752	9.70053
118507292	adenosylhomocysteinase-like 1, transcript variant X6	14.2066	13.8691	16.3399	10.0485	11.3923	8.91377	25.7617	20.5737	19.5271	12.7363	15.2968	22.0692	14.5331	13.066	6.56227	15.2908	15.4478	15.4818	14.8844	18.2594	12.4988
118510121	adenylate cyclase type 10-like, transcript variant X1	0.0404269	3.41443e-06	3.60089e-06	5.01717e-07	4.80406e-07	1.54418e-06	1.18845e-06	3.43712e-06	1.26111e-06	2.56486e-06	4.33444e-06	2.73182e-06	2.27731e-06	2.38764e-06	2.74825e-06	3.55001e-06	6.96096e-07	0.156593	4.20256e-07	8.77748e-07	2.49365e-06
118510121	adenylate cyclase type 10-like, transcript variant X2	0	0.198106	0.141427	0.0217433	0.0625075	0.108232	0.149886	0.149984	0.11778	0.379389	0.245778	0.11314	0.102843	0.0903016	0.113211	0.175222	0.0346349	0	0.039365	0.087809	0.1016
118512060	adenylate cyclase type 2	0.0460646	0.0894948	0.0799135	0.0737296	0.084753	0.0458565	0	0.113005	0.0249508	0	0.0735314	0.109663	0.13068	0.218511	0.0479632	0.0791745	0.0587174	0.041198	0.0667256	0.124202	0.038234
118506236	adenylate cyclase type 2, transcript variant X1	0	0	0	0	0	0	0	0	0	0	0	0	0	0	0	0	0	0	0	0	0
118506236	adenylate cyclase type 2, transcript variant X10	0	0	0	0	0	0	0	0	0	0	0	0	0	0	0	0	0	0	0	0	0
118506236	adenylate cyclase type 2, transcript variant X11	0.927167	0.517971	0.253019	0.372365	0.425365	0.59199	1.03325	0.328696	0.989797	1.22095	0.624875	0.978885	0.544669	0.730644	0.977342	0.270694	0.428656	0.254943	0.590759	0.828806	0.534781
118506236	adenylate cyclase type 2, transcript variant X12	0.671053	0.992916	1.69301	0.899817	1.34918	0.869909	1.58781	1.99469	1.65226	0.793277	0.379057	1.46074	0.761954	0.58175	1.03216	0.837189	0.504143	1.50049	0.994768	1.14326	0.667733
118506236	adenylate cyclase type 2, transcript variant X13	0	0.422097	0.291841	0	0.382719	0.15136	0.274151	0	0.31296	0.233509	0.392547	0.302921	0.225192	0.199815	0	0.34397	0.20848	0.290147	0.371808	0.148624	0.0986635
118506236	adenylate cyclase type 2, transcript variant X14	0.28615	0.828406	0.415912	0.239604	0	0.13414	0.239718	0.742547	0	0.834479	0.228132	0.592011	0.275147	0.306467	0.481622	0.525621	0.275345	0.197081	0.188637	0.135529	0.17811
118506236	adenylate cyclase type 2, transcript variant X15	35.1843	35.9842	47.3507	37.2062	47.5188	38.0082	42.5519	50.4573	40.6651	44.8284	41.0563	46.9377	39.736	40.9304	44.0224	32.1963	47.5659	46.2355	46.965	47.882	42.0688
118506236	adenylate cyclase type 2, transcript variant X2	0.900362	1.60702	0	0	0.434781	0.431709	0	0	0	0	0	0	0	0	0	0.404972	0	0	0	0.430922	0
118506236	adenylate cyclase type 2, transcript variant X3	1.80807	3.50104	2.3459	1.26867	2.603	1.15447	0.459096	0.34791	1.48083	0	0	0	0.682908	0.956616	0.523441	2.09104e-09	1.59785	0.462506	0.676976	2.0827	2.43673
118506236	adenylate cyclase type 2, transcript variant X4	1.1232	0.0785538	0	0.746546	0	0.0980687	0.078287	0	0	0	0.516849	0	0	1.07102	0	0.602586	0.0740166	0.993995	0	0.0872761	0.848653
118506236	adenylate cyclase type 2, transcript variant X5	0.593726	0.92893	1.24352	0.820396	2.33515	1.21101	1.10412	0	0	0	0	0	0	2.10889e-09	0.405538	0	0.846601	0	0.481605	1.17103	0.941252
118506236	adenylate cyclase type 2, transcript variant X6	0.142316	1.29521	0.312339	1.12548	0.598027	1.0413	0.662144	0.389266	0.325562	0.297839	0	0	0.10884	0.120106	0.526428	0.128798	0.39583	0.568803	0	0.575267	0.251776
118506236	adenylate cyclase type 2, transcript variant X7	2.06096	1.55746	2.20731	2.35384	1.47353	2.14618	2.54224	0.728367	1.71038	1.49781	1.54441	1.49172	0.954307	1.05893	1.18158	0.795315	1.65557	1.43736	0.739074	1.93556	1.67192
118506236	adenylate cyclase type 2, transcript variant X8	0	0	0	0	0	0	0	0	0	0	0	0	0	0	0	0	0	0	0	0	0
118506236	adenylate cyclase type 2, transcript variant X9	8.09893	8.22625	10.0913	10.8014	15.6354	10.719	18.6882	13.429	10.2185	11.6301	15.2017	15.0944	13.3645	13.7551	8.0324	13.3872	9.35124	8.81095	11.779	12.5726	9.08392
118510863	adenylate cyclase type 3, transcript variant X1	57.3576	64.6036	98.294	69.8219	111.19	69.9731	97.1645	84.7534	61.0869	94.7143	83.4162	73.6695	71.503	87.7255	69.6125	81.4226	93.7895	98.4966	84.4929	91.1833	57.2152
118510863	adenylate cyclase type 3, transcript variant X2	5.26539	0.0203364	5.09859	1.28613	10.7768	4.92982	10.7923	16.8043	9.15344	9.45172	3.88071	13.9202	15.0754	2.62756	14.9544	3.39603	11.6104	4.48005	7.04347	10.7056	13.702
118505859	adenylate cyclase type 6, transcript variant X1	30.1306	36.7082	56.5708	41.4561	63.106	41.7708	38.6714	40.7055	26.6595	36.8988	39.9179	43.2047	43.1932	42.5045	39.552	35.7507	43.6383	45.3759	39.2713	36.1208	23.7986
118505859	adenylate cyclase type 6, transcript variant X2	3.04909	1.88663	0.171604	0.212126	3.11785	2.29366	7.83393	8.16401	5.70562	9.45555	6.23293	7.33885	1.74776	4.27236	5.45412	1.23872	4.80975	3.13364	12.4508	4.76583	10.0744
118505859	adenylate cyclase type 6, transcript variant X3	1.10481	0.0504561	0	8.29734e-06	1.05238e-05	1.11314	1.88876	1.26768	9.12716e-07	1.43877	3.17524	2.14829	1.62964	4.96003e-07	4.45199e-05	0	1.76663e-05	1.57291e-07	4.74253e-05	1.70523	3.32825
118509964	adenylate cyclase type 9, transcript variant X1	0	0	0	0	0	0	2.75369e-09	5.66641e-09	0	0	0	1.04452e-06	0	0	0	6.49405e-07	0	0	1.04139e-08	0	0
118509964	adenylate cyclase type 9, transcript variant X10	0	0.351869	0.490568	0	0.790791	1.00147	0.376899	0.857546	0.63929	1.5299	0.701695	0.796655	1.07406	1.16343	0.308907	0.304706	0.643529	0.92032	1.7082	1.0248	0
118509964	adenylate cyclase type 9, transcript variant X11	0.60852	9.93334e-05	0.142703	0.51796	0.181603	0	3.30899	0.000309419	0.959552	2.69471e-05	1.37997	1.64487	2.24555	0.0421031	8.1781e-08	1.52397	1.99998	1.3683	1.70311	1.64472e-06	2.37274
118509964	adenylate cyclase type 9, transcript variant X2	0	0.208063	0	0.0774543	0	0	0.130972	0.292045	0.112609	0.125251	0	0.294105	0.190507	0	0.112214	0.109244	0	0.196282	0.389567	0	0.250289
118509964	adenylate cyclase type 9, transcript variant X3	3.9857	4.61152	9.01774	4.02557	8.79844	5.1595	12.3669	13.4944	6.42255	8.18466	7.79681	8.36646	8.15903	8.19229	9.32094	9.03853	12.4327	10.7921	9.25003	9.12652	5.9303
118509964	adenylate cyclase type 9, transcript variant X4	0	0	0	0	0	0	0	0.487061	0.175579	0	0	0	0	0	0	0	0.183142	0	0	0	0
118509964	adenylate cyclase type 9, transcript variant X5	0	0	0.000808717	0	1.85166e-10	0.603872	0.751568	4.95507e-05	0.278991	2.00052e-08	0	5.86398e-06	0	2.37698e-05	0.335858	0.120712	0	0	0	0.800181	1.88737e-09
118509964	adenylate cyclase type 9, transcript variant X6	0	0	0	0	0	0	0	0	0	0	0	0	0	0	0	0	0	0	0	0	0.602666
118509964	adenylate cyclase type 9, transcript variant X7	0.496985	0.51078	1.36542	8.56073e-06	1.39476	0.000762054	0.10501	2.05964	0	2.86425	0.829108	0.00125887	1.30421e-06	3.02081	1.23299	0.0422541	1.44237e-09	0.000684216	0.276856	2.68493	0.0551683
118509964	adenylate cyclase type 9, transcript variant X8	0	0.126482	0.20022	0	0	0.161167	0	0.423844	0.13217	0	0	0.191649	0.140152	0.155824	0.278695	0.146204	0.116879	0.143661	0.498986	0.173742	0.140531
118509964	adenylate cyclase type 9, transcript variant X9	0	0	1.26844e-06	0	2.29338e-07	0	8.94711e-10	2.91061e-05	0	0	0	0	0	1.04598e-10	0	4.23462e-07	0	6.99484e-09	7.08813e-10	0	0
118510861	adenylate kinase isoenzyme 1, transcript variant X1	36.4183	30.3313	34.7203	25.7523	37.6257	39.2003	27.4167	37.8421	22.7844	31.3294	29.0527	35.8234	24.778	24.4366	26.02	23.6045	20.6845	16.0617	30.5805	39.1898	21.8243
118510861	adenylate kinase isoenzyme 1, transcript variant X2	15.0263	19.8637	21.5786	13.9933	15.6049	14.7915	15.9583	17.8128	23.2729	16.6354	21.7749	10.0647	23.4886	17.8478	9.03258	9.71742	12.942	18.3744	27.3784	15.847	21.1261
118510861	adenylate kinase isoenzyme 1, transcript variant X3	199.578	203.254	234.962	172.318	207.478	171.258	143.33	139.962	143.911	131.889	121.968	118.06	87.7863	91.9204	82.8903	89.8184	92.5432	100.447	100.636	106.835	87.0314
118510861	adenylate kinase isoenzyme 1, transcript variant X4	53.8761	30.4353	57.6893	20.1504	19.0247	23.5013	84.678	69.1954	55.6349	39.6393	42.7407	26.6625	41.5162	29.5124	17.8797	14.183	20.0176	27.4248	32.1216	18.6735	28.4303
118510861	adenylate kinase isoenzyme 1, transcript variant X5	8.13061	8.9862	8.02759	5.95516	2.19227	8.61771	0	4.4086	5.78872	7.57	0	1.80386	0	0	1.24177	3.42857	5.47498	0	1.39607	2.81975	1.97306
118510861	adenylate kinase isoenzyme 1, transcript variant X6	213.358	227.551	204.767	201.208	161.396	166.41	156.446	121.627	148.222	116.593	89.9888	122.585	53.7533	74.7979	79.6419	49.9967	71.3461	66.8279	68.4717	100.389	90.5814
118510860	adenylate kinase isoenzyme 5, transcript variant X1	0.0552234	0.0138138	0	0.184148	0	0.269072	0.292768	0	0	0.463979	0.16445	0.386521	1.09325	0.656677	0.15397	0.131062	0.47537	0.667569	0.135707	0.444992	0.0449249
118510860	adenylate kinase isoenzyme 5, transcript variant X2	1.626e-08	0	0	0.367314	3.34917e-08	0	3.46268e-08	0.881371	2.61199e-08	0.598872	0	1.47535e-07	0.160182	0.552155	1.47927e-07	0.463512	0.257214	1.67761	0.906062	1.25687	0.467011
118510860	adenylate kinase isoenzyme 5, transcript variant X3	0.0688217	0	0	0	0.599798	0	0.59627	0	0.291844	0	0	0.529833	0.0047146	0	0.516996	0	0	0	8.1176e-05	0	0.188461
118510860	adenylate kinase isoenzyme 5, transcript variant X4	0	0	1.16758e-09	0	0.34579	3.09442e-10	0	0	0	0	1.33559e-09	0	0.442672	0	0	1.46109e-09	0	0	0	0	2.29256e-06
118510860	adenylate kinase isoenzyme 5, transcript variant X5	0	5.95306e-10	3.38875e-09	3.80376e-10	0	9.51715e-10	0	0	0	0	4.02324e-09	0	0	0	0.246947	4.33655e-09	0	0	0.343979	0.660949	6.66799e-06
118510860	adenylate kinase isoenzyme 5, transcript variant X6	0	0.0975075	0.288099	0.0385131	0	0.218437	0	0	0	0	0.646844	0	0	0	0	0.540765	0	0	0	0	0
118511027	adenylate kinase isoenzyme 6 homolog	16.2518	14.2376	13.3149	17.0394	15.376	15.3269	26.1665	20.7001	21.6626	23.9922	23.4207	19.2074	22.5604	20.9013	19.7139	22.1916	18.8987	22.1642	20.7172	19.1984	21.3753
118512307	adenylate kinase, transcript variant X1	0	0	0	0	1.03484	0	0	0	0	0	0	0	0	0	0	0	0	0	0	0	0
118513613	adenylate kinase, transcript variant X1	64.9135	61.6621	54.5096	71.8445	54.7336	68.5662	46.2449	42.2702	65.8799	57.9951	52.8349	47.7982	57.2403	52.8451	55.7405	53.0762	52.5104	44.7923	55.8339	56.3959	73.2484
118512307	adenylate kinase, transcript variant X10	0	0	0	0	0	0	0	0	0	0	0	0	0	0	0	0	0	0	0	0	0.0866293
118512307	adenylate kinase, transcript variant X11	0	0	0	0	0	0	0	0	0	0	0	0	0	0	0	0	0	0	0	0	0
118512307	adenylate kinase, transcript variant X2	0	0	0	0	0	0	0	0	0	0	0	0	0	0	0	0	0	0	0	0	0
118513613	adenylate kinase, transcript variant X2	0	0.751455	0	1.33107	0	0.697078	1.05258	1.04716	0	0	0.836868	0	1.03025	0	0	0	0	0	0	0	0.83894
118512307	adenylate kinase, transcript variant X3	0	0	0	0	0	0	0	0	0	0	0	0	0	0	0	0	0	0	0	0	0
118512307	adenylate kinase, transcript variant X4	0	0.165895	0.0991721	0	0	0	0	0	0	0	0	0	0	0	0	0.0734903	0.0729195	0	0	0.279876	0
118512307	adenylate kinase, transcript variant X5	0	0	0	0	0	0	0	0	0	0	0	0	0	0	0	0	0	0	0	0	0
118512307	adenylate kinase, transcript variant X6	0	0	0	0	0	0	0	0	0	0	0	0	0	0	0	0	0	0	0	0	0
118512307	adenylate kinase, transcript variant X7	0	0	0	0	0	0	0	0	0	0	0	0	0	0	0	0	0	0	0	0	0
118512307	adenylate kinase, transcript variant X8	0	0	0	0	0	0	0	0	0	0	0	0	0	0	0	0	0	0	0	0	9.58905e-05
118512307	adenylate kinase, transcript variant X9	0	0	0	0	0	0	0	0	0	0	0	0.164262	0	0	0	0	0	0	0	0	0
118517284	adenylate kinase-like	53.0313	62.9711	52.2131	65.6677	63.473	73.3824	40.2358	41.0381	44.4608	50.441	52.1415	59.8554	54.0016	56.9091	62.526	61.6876	45.0436	53.0157	47.9938	59.2792	48.2241
118502863	adenylosuccinate lyase	33.7338	33.9952	33.7357	34.6497	33.5745	35.2567	22.0681	22.3662	25.2492	23.9775	21.4063	21.8727	36.6971	30.8015	36.9801	32.0293	30.0381	29.2136	24.2295	23.8112	23.8653
118506780	adenylosuccinate synthetase	84.2056	77.0455	86.339	83.8754	82.3952	90.4569	77.5314	89.158	76.1033	73.3798	75.5489	80.3276	80.4393	72.2604	72.8648	71.3729	75.0502	77.8873	81.9854	74.8578	76.9608
118506685	adenylyl cyclase 78C, transcript variant X1	0	0	0	0	0	0.273402	0	0.430929	0	0	0	0.330711	0	0	0	0	0	0.451534	0	0	0
118506685	adenylyl cyclase 78C, transcript variant X2	0.749323	0.441057	0.478959	0.780576	1.25596	0.798393	1.04768	1.34489	0.355737	0.693902	1.9851	0.415719	0.845889	0.654007	1.79022	1.11978	1.00445	1.97845	1.08283	1.11916	0.634422
118506685	adenylyl cyclase 78C, transcript variant X3	4.35402	7.06815	5.89214	6.29108	10.6134	8.43481	6.8717	10.5562	5.37901	9.0485	5.42618	5.27755	7.81773	11.9505	7.38987	6.74879	7.81407	9.14954	10.1786	10.267	5.21079
118506685	adenylyl cyclase 78C, transcript variant X4	0.332791	0.343661	0	0.240721	0	0.770631	0	0.568782	0	0.668397	0.680448	0.762385	1.509	0	0.334821	0.20303	0.653119	0	0.538159	0.692161	0.251498
118506685	adenylyl cyclase 78C, transcript variant X5	5.3326	4.27107	7.64398	6.99643	8.28889	7.79153	7.4325	3.90452	6.15842	6.91112	10.5684	8.81318	9.58219	5.80874	10.534	7.97634	12.4167	8.92235	7.46529	9.30689	10.5142
118506685	adenylyl cyclase 78C, transcript variant X6	6.36985	7.66522	13.2968	10.4035	15.3577	11.8133	12.4183	13.4246	9.79647	18.8136	17.2159	17.5143	21.3702	21.0471	16.6999	14.9016	19.0675	18.471	21.8765	15.5458	12.2864
118511074	adenylyl cyclase-associated protein 2, transcript variant X1	32.0506	38.6541	73.9867	32.1636	79.5817	44.2259	66.9834	70.2546	39.3527	54.0156	52.9156	50.2228	51.2979	51.9022	48.3316	42.2547	56.4899	53.5159	60.6269	59.9108	37.9023
118511074	adenylyl cyclase-associated protein 2, transcript variant X2	2.21602	0.527471	2.67662	1.96002	4.45803	1.01706	3.46277	4.6656	3.23066	3.00774	1.96977	2.62323	7.66175	8.22689	3.85043	3.29596	5.7785	4.22825	5.96127	5.00697	4.74183
118511074	adenylyl cyclase-associated protein 2, transcript variant X3	5.94366	6.93219	6.33074	6.98381	6.82607	8.16264	9.84355	11.6465	6.07469	9.25666	10.6686	12.4833	10.326	10.0574	12.5255	9.21987	10.6458	12.1581	7.67687	11.247	7.84864
118511074	adenylyl cyclase-associated protein 2, transcript variant X4	5.31929	10.0134	8.95961	8.1911	9.89596	5.89294	15.3625	14.1574	12.9671	12.7429	12.5712	15.5477	12.7648	8.17964	9.48021	11.1849	11.8017	12.1674	7.05801	11.7473	9.60371
118511074	adenylyl cyclase-associated protein 2, transcript variant X5	16.7579	21.7742	46.5974	21.7133	56.1006	35.8743	42.6449	44.4012	27.6645	37.0758	39.5645	31.807	67.5616	67.9619	69.5763	63.1659	80.3061	62.1547	86.039	61.1344	59.8389
118511074	adenylyl cyclase-associated protein 2, transcript variant X6	5.53389	6.52688	7.34216	6.94426	8.10316	8.28834	8.58541	8.28549	4.20359	8.61836	10.5905	8.26821	11.2955	10.6159	8.68674	7.16908	11.5512	10.9826	12.4713	10.9469	7.97651
118511074	adenylyl cyclase-associated protein 2, transcript variant X7	1.76971	2.5581	2.61974	3.0276	4.27682	2.87796	8.13112	4.41793	3.95517	6.18918	6.07048	3.25184	7.91002	7.39667	5.71302	7.01958	5.86794	10.3761	11.6435	5.27108	5.98724
118505072	adenylyltransferase and sulfurtransferase MOCS3	33.31	36.2048	32.5227	36.4846	29.8734	31.3849	36.132	33.0444	35.9801	36.1949	28.4765	29.1604	31.1309	32.4433	33.0777	31.845	30.9199	29.7441	28.8397	32.7314	32.4866
118505290	adhesion G protein-coupled receptor L1-like, transcript variant X1	21.7512	19.8314	23.729	25.6123	24.2682	22.1863	29.2838	16.4962	23.7113	29.0903	20.4408	14.1546	15.4107	23.6815	16.1329	20.0918	21.3722	16.5711	21.0868	15.03	17.0469
118517190	adhesion G protein-coupled receptor L1-like, transcript variant X1	2.67584	4.0675	6.52145	2.08623	3.3047	3.95602	10.0798	3.94821	1.00389	4.34157	3.77878	3.73312	1.75258	4.65357	4.31343	2.70954	2.03042	3.72888	2.56297	1.68567	3.7776
118505290	adhesion G protein-coupled receptor L1-like, transcript variant X2	4.20365	7.12932	4.32509	2.85142	8.95325	9.23249	5.14387	14.1088	6.84878	5.69176	8.949	9.27575	9.98336	2.97041	9.1962	5.65659	2.96802	5.72104	1.84613	3.22678	11.3552
118517190	adhesion G protein-coupled receptor L1-like, transcript variant X2	39.1887	32.8014	36.5509	32.5075	31.6422	36.4884	42.6514	49.8716	37.9129	44.4808	44.2754	43.9802	48.2275	33.0766	31.4427	33.6356	36.2605	37.9368	35.4878	31.4355	36.9271
118505290	adhesion G protein-coupled receptor L1-like, transcript variant X3	2.25325	3.68706	4.42536	1.02421	0	3.41107	2.06753	0	1.57949	0.846481	2.70641	0.930822	3.77852	1.88238	3.37026	1.99127	0	5.48125	5.1669	3.54371	1.41712
118517190	adhesion G protein-coupled receptor L1-like, transcript variant X3	7.35259	7.94646	7.05015	5.01261	5.18623	8.1437	8.73545	7.87117	8.75003	8.20284	6.55192	8.38386	7.87822	10.2012	9.84021	7.63185	6.46164	6.74681	10.6545	4.60269	6.01715
118505290	adhesion G protein-coupled receptor L1-like, transcript variant X4	5.29364	1.06198e-08	3.46364e-05	4.58184	1.24634	4.39564	5.11986	8.67777	0.778183	0.0546657	4.45759	7.05061	5.38152	0	0	3.1866	4.48935	5.06467	1.11638	4.21676	2.90427
118517190	adhesion G protein-coupled receptor L1-like, transcript variant X4	0	0	0	0	0	0	0	0	0	0	0	0	0.080023	0	0	0	0	3.86599e-06	0	0	0
118505290	adhesion G protein-coupled receptor L1-like, transcript variant X5	4.54373	1.55181	2.24168	1.47876	0.608503	0.983074	4.97072	0	0.936142	1.35855	3.01941	5.0893	6.59224	6.26262	4.00161	1.28304	2.33235	3.03265	3.55816	4.5807	2.21686
118507324	adhesive plaque matrix protein-like	0.210494	0	0	0.41252	0.156818	0	0.325297	0.542625	0.227718	0	0	0	0	0	0.219141	0.623581	0	0.17564	0	0.682021	0.236807
118507326	adhesive plaque matrix protein-like	0.138383	0.401364	0.119695	0.165739	0.142742	0.102954	0.12971	0.380903	0.168056	0.347082	0	0	0.14656	0.0489783	0.187523	0.615015	0.175952	0.355022	0.24982	0.194147	0.0981857
118507333	adhesive plaque matrix protein-like	0	0.0413633	0	0	0	0	0	0.220437	0	0	0	0	0	0	0	0.153365	0	0	0	0.640193	0
118507317	adhesive plaque matrix protein-like, transcript variant X1	0	0	0.147185	0.159267	0	0	0	0.156202	0.275055	0.142514	0	0	0	0	0.200288	0	0	0.11394	0.245661	0	0
118507323	adhesive plaque matrix protein-like, transcript variant X1	0	0	0	0.180425	0	0	0	0	0	0	0	0	0	0	0	0.111071	0	0	0	0	0
118507317	adhesive plaque matrix protein-like, transcript variant X2	0.340731	0.303961	0.1319	0.26963	0.41902	0.113281	0.170981	0	0	0	0	0	0.214579	0.107401	0	0.688168	0.291045	0	0	0.223464	0.187483
118507323	adhesive plaque matrix protein-like, transcript variant X2	0.269995	0	0	0	0.107241	0	0.176553	0	0	0.261443	0	0	0	0	0	0	0.0993245	0	0.225399	0	0
118506908	adipocyte plasma membrane-associated protein	157.397	141.883	147.073	134.269	131.627	157.89	114.822	124.95	114.098	127.508	147.312	139.961	165.632	148.473	150.39	153.113	146.926	132.655	161.297	143.984	150.812
118505071	adipocyte plasma membrane-associated protein-like	19.6106	21.6626	46.193	20.5565	53.074	25.5935	53.2744	46.9794	24.9855	40.7103	31.7786	33.7737	34.2363	41.4013	36.1479	38.4783	51.8674	49.3479	55.3957	52.7579	32.4293
118514453	ADP,ATP carrier protein 1	7073.85	6934.96	6158.81	7134.24	5887.84	6678.28	5168.81	5568.55	6334.25	5146.33	5189.83	5265.47	4416.41	4437.93	4649.6	4482.24	4513	4240.88	4595.29	4733.23	4459.61
118502886	ADP,ATP carrier protein 2	25.6948	5.13818	6.27026	124.147	20.5402	21.5098	6.24522	1.60807	7.80254	28.7102	14.145	15.4974	14.8986	7.72052	7.31154	7.15661	6.48306	19.1356	7.70804	47.4032	6.10775
118509552	ADP-dependent glucokinase	13.034	13.7949	12.6669	12.0481	11.2001	13.1356	15.4726	14.3783	12.7985	14.875	13.2939	13.7936	19.1343	16.5191	15.3868	15.1115	13.4431	15.0174	17.938	16.7348	17.7026
118507589	ADP-ribose glycohydrolase ARH3-like	14.7198	15.631	14.4471	13.9287	13.2451	14.6732	13.7858	14.7924	13.7948	16.6147	13.9554	12.5312	14.2384	11.8716	15.7035	17.0683	12.4801	12.7425	16.6973	16.4454	16.9215
118504770	ADP-ribose glycohydrolase OARD1-like	27.0472	32.833	26.6749	24.3489	21.6579	32.2349	23.2555	28.9904	29.5979	25.4605	30.2148	29.4743	27.0679	26.0295	33.851	28.0801	31.2457	23.1183	34.9056	32.6636	33.9719
118510475	ADP-ribose pyrophosphatase, mitochondrial	57.8388	33.1587	53.0335	26.2202	27.4366	28.3885	64.0472	57.7669	56.0917	34.674	27.178	26.2612	29.0314	32.4295	33.5802	30.2344	31.7549	29.3536	32.7159	36.8757	30.2406
118507649	ADP-ribosylation factor 2, transcript variant X1	113.805	132.824	114.718	132.696	114.365	116.703	99.0504	111.054	121.295	118.766	120.839	127.614	113.515	105.783	118.356	115.022	117.038	119.544	127.099	127.358	123.038
118507649	ADP-ribosylation factor 2, transcript variant X2	35.7221	37.7914	36.2712	30.5451	31.0282	30.3165	37.4873	42.536	42.4448	28.7123	34.8486	35.627	42.3526	42.0706	34.2639	34.7501	34.988	29.9824	38.1782	32.5723	32.5258
118507649	ADP-ribosylation factor 2, transcript variant X3	5.81758	0.908503	0	0.716801	2.70891	4.2494	1.28355	1.2214	1.86525	1.87981	1.07488	1.0229	2.13213	2.86898	1.93439	3.40312	0	0.929854	5.09611	2.17596	1.69764
118507649	ADP-ribosylation factor 2, transcript variant X4	0	1.9675	4.45189	2.87491	1.33033	3.56809	2.78139	1.80788	1.62971	2.54592	3.62195	0.859588	1.76104	2.11784	1.39982	2.23256	1.21926	1.22128	3.54629	2.92282	1.61979
118507649	ADP-ribosylation factor 2, transcript variant X5	0.669538	0.646888	0	0	0	0	0	0	0	0	0	0.718479	0	0.621231	0	0.516307	0	0	0	0	0
118512692	ADP-ribosylation factor 6, transcript variant X1	31.6967	25.5582	46.6741	29.823	45.6996	38.0645	45.9175	53.1678	46.0651	51.6845	43.5995	40.2215	35.2973	43.6264	30.4392	31.0577	41.8141	36.2208	48.6202	36.8208	28.2941
118512692	ADP-ribosylation factor 6, transcript variant X10	0	0	0	0	0	0	0.633494	0	0	0	0	0	5.69945e-08	0.000296233	0	9.6136e-09	0	0	0	0	9.44584e-10
118512692	ADP-ribosylation factor 6, transcript variant X11	3.26752	2.9059	1.0017	4.54946	6.4975	3.17448	5.60256	3.09446	4.33159	2.17012	1.43393	6.80884	1.72149	1.60409	2.98313	1.9644	2.22035	3.60226	5.87794	3.49386	2.47041
118512692	ADP-ribosylation factor 6, transcript variant X12	4.23845	1.25909	5.13795	0.962429	2.08936	0.884227	2.96399	3.4247	4.36728	4.9265	3.92501	2.43184	1.70435	2.19755	0	2.17757	2.34216	3.94272	5.50371	6.31307	2.61627
118512692	ADP-ribosylation factor 6, transcript variant X13	0	0	0	0	0	0	0	0	0	0	0	0	0	0	0	0	0	0	0	0	0
118512692	ADP-ribosylation factor 6, transcript variant X14	2.20789	1.23071	0.141375	0.773052	9.93327e-05	1.04997	0	3.62321e-07	0	3.43184e-08	6.22071e-09	0.00553765	0.351619	0.00121079	3.68872	4.06528e-05	0.00257939	0	1.67256e-09	2.47589e-07	0.00138449
118512692	ADP-ribosylation factor 6, transcript variant X15	1.73732e-06	0	6.4223e-06	2.8809	6.40595e-05	7.23397e-07	0	2.98054e-06	2.28723e-07	0	2.15932e-08	0.00125387	3.72825	2.30811e-07	0.00319415	5.81322e-07	1.2052	3.88433e-09	6.60302e-06	1.07796e-07	8.5159e-07
118512692	ADP-ribosylation factor 6, transcript variant X2	7.08302	9.40099	8.27414	6.37146	8.25681	8.04992	8.86925	13.1332	8.07126	6.66771	6.60549	6.56342	4.15243	3.73488	7.31819	3.98536	7.84977	5.38306	5.6831	11.9804	6.59707
118512692	ADP-ribosylation factor 6, transcript variant X3	7.25818	6.94622	5.20565	5.79343	4.46681	6.93581	7.49986	6.86168	6.65904	5.52485	3.90128	7.18242	2.62438	4.23273	2.30448	5.1945	6.0478	0.697403	3.05483	7.09334	5.24941
118512692	ADP-ribosylation factor 6, transcript variant X4	0.912995	2.01374	1.24658	0.566653	1.33102	1.10374	0.751972	0	2.39505	2.06595	0.845991	2.24603	0	1.56769	0	0	1.65538	0	0.818488	2.3472	0.595413
118512692	ADP-ribosylation factor 6, transcript variant X5	5.47816	5.21965	10.2869	5.79315	10.812	6.47127	10.07	8.40965	4.03177	10.7157	8.00961	9.16028	8.15694	5.25905	8.03509	8.10073	8.14532	11.0542	6.7456	12.936	10.5557
118512692	ADP-ribosylation factor 6, transcript variant X6	18.8965	33.0772	47.279	24.1125	44.1943	28.7317	49.4469	50.2015	42.0298	32.3646	37.8472	44.2644	38.3715	35.196	37.1611	37.8795	38.6285	38.7499	46.9788	35.0275	32.7816
118512692	ADP-ribosylation factor 6, transcript variant X7	4.71303	5.10433	5.86066	4.35477	8.14941	6.06567	9.17056	10.0682	7.66083	8.37183	7.69273	5.91114	7.80753	8.70556	8.15941	5.70628	4.70706	10.2822	6.107	7.11121	7.40205
118512692	ADP-ribosylation factor 6, transcript variant X8	2.34247	3.29873	2.64691	1.76071	3.28235	1.44439	2.58071	1.50718	4.0525	1.66267	2.0077	1.21453	0.57206	2.76741	2.59073	0	3.07389	0.567547	5.47461	1.47899	0.529082
118512692	ADP-ribosylation factor 6, transcript variant X9	0	0.796698	1.4976	0.852245	3.56572e-10	1.01188	1.45482	4.57331e-09	0	0.850374	0	0	7.77749e-09	1.27522	8.17512e-08	0	0	0	0	0	0
118509690	ADP-ribosylation factor GTPase-activating protein 1, transcript variant X1	1.60176	3.80657	2.75088e-05	5.45974	3.64962e-06	0	7.44578	1.06464	13.2411	6.6214	13.104	3.30179	1.07982e-05	2.31487	5.40905	0.0939398	0.993328	6.33183	10.2339	9.08188	2.00098
118509690	ADP-ribosylation factor GTPase-activating protein 1, transcript variant X2	11.643	13.042	13.6642	11.9423	13.5261	12.3049	7.68702	17.3988	7.64367	9.85613	9.49601	11.6755	18.0234	19.1898	15.662	17.0704	18.3754	15.3791	8.03548	12.2106	15.6624
118509690	ADP-ribosylation factor GTPase-activating protein 1, transcript variant X3	54.4391	49.564	63.7484	44.7994	70.9532	53.109	65.9092	72.1183	69.3416	50.7311	58.2812	66.5396	56.6375	70.5047	63.6303	47.6917	65.7288	62.4223	78.3539	82.4197	64.837
118509690	ADP-ribosylation factor GTPase-activating protein 1, transcript variant X4	0	0	0	0	0	0	0	0	0	0	0	0	0	0	0	0	0	0	0	0	0
118509690	ADP-ribosylation factor GTPase-activating protein 1, transcript variant X5	11.7019	6.1941	17.3343	11.7959	15.0586	14.7474	19.763	22.2887	7.93497	27.8117	19.2688	15.2604	16.4866	7.48835	18.1138	16.7689	13.6135	19.3536	7.79361	6.4034	8.71351
118509690	ADP-ribosylation factor GTPase-activating protein 1, transcript variant X6	31.2303	23.9827	34.6767	24.4739	33.2895	37.7791	32.7736	35.5724	29.6881	28.2927	23.3157	31.9006	27.0555	30.7633	22.4949	34.2974	36.2169	29.8035	29.1307	27.4459	23.8923
118512815	ADP-ribosylation factor GTPase-activating protein 2	39.4401	43.394	52.4294	40.3791	55.8106	42.0516	41.4265	45.2814	39.9809	40.8207	40.3698	43.5491	41.7659	42.4353	41.3354	41.7818	48.0305	43.2464	46.7509	45.7608	36.9591
118508063	ADP-ribosylation factor-binding protein GGA1, transcript variant X1	12.4118	13.8744	13.1399	13.0923	8.69788	12.7758	15.2861	13.8315	20.2659	20.1946	11.5168	15.976	16.554	15.7753	10.9788	12.579	15.9842	17.3911	14.3865	11.5293	12.3416
118508063	ADP-ribosylation factor-binding protein GGA1, transcript variant X2	27.0471	24.7874	26.7611	24.3017	31.6347	27.5148	33.1966	37.6261	30.4238	29.9234	34.4798	27.8699	35.1135	31.8057	36.7775	35.9451	26.1048	32.0287	35.0123	38.2102	32.0871
118505961	ADP-ribosylation factor-like protein 1	107.859	109.204	107.735	101.631	105.602	108.704	82.952	85.677	82.6658	89.1614	87.2736	81.2345	90.628	94.6405	93.3845	87.4991	86.7551	89.2915	91.1837	82.1002	93.7824
118502563	ADP-ribosylation factor-like protein 13A	12.7248	16.2687	13.8784	11.3749	16.2309	10.8358	18.4653	13.7914	15.5398	12.2903	14.5799	12.7263	12.5819	8.85472	10.6262	13.4719	6.82687	9.90674	8.8108	11.3986	8.70996
118508305	ADP-ribosylation factor-like protein 16	5.44172	2.1727	4.33565	0.429271	0.196786	0.319221	11.4672	6.44094	7.29523	0	0.114104	0	0.403207	0.201847	0	0.275134	0.273316	0.575232	0	0.23376	0.0881035
118511920	ADP-ribosylation factor-like protein 2	87.6597	77.5036	69.525	74.8927	67.4804	81.6355	67.2148	69.5861	81.3127	75.4064	75.0325	72.2314	75.9341	79.2441	81.0354	77.3701	72.4003	71.3911	79.4586	69.5472	79.707
118508589	ADP-ribosylation factor-like protein 2-binding protein, transcript variant X1	2.07805	0.483801	0.486752	0.665031	0.401712	0.487335	0	0.506403	1.86341	1.00363	1.11893	0.463761	1.58742	0.673132	1.05626	1.01787	1.09279	0.7984	1.93696	0.754567	0.940301
118508589	ADP-ribosylation factor-like protein 2-binding protein, transcript variant X2	4.85339	2.99754	6.0339	3.50284	2.92807	6.9196	3.05457	6.19245	3.35681	5.63106	6.14322	3.88317	5.0275	2.65553	3.32715	4.02092	7.86504	5.20615	5.93465	2.96617	5.66205
118508164	ADP-ribosylation factor-like protein 5B	57.951	46.1639	63.6165	53.4135	63.8948	66.5513	58.0413	60.7241	55.5196	64.2403	57.6273	63.5775	62.2191	61.4286	59.3305	60.4736	67.9386	69.1436	68.7177	59.9258	53.687
118507415	ADP-ribosylation factor-like protein 6, transcript variant X1	2.30151	1.71179	4.22228	3.23729	2.40748	1.78608	2.4934	6.1368	3.9172	5.90704	3.77224	2.88964	0.450135	0	1.20336	1.41864	0	0	1.07888	3.56872	1.97658
118507415	ADP-ribosylation factor-like protein 6, transcript variant X2	5.40696	2.52875	1.44153	1.32536	0	0.27889	9.38917	8.98849	7.30369	0.920946	0.319087	0.314357	0.244365	1.17564	0	0.578538	0.422749	1.00101	0.699229	0.401108	0.448857
118508586	ADP-ribosylation factor-like protein 6-interacting protein 4	23.6036	17.0709	18.4417	15.0174	14.0363	16.7849	18.142	20.176	14.7568	17.1432	17.1738	14.657	15.1132	14.8046	15.0077	16.9633	14.8219	15.7425	16.8067	10.5595	16.6384
118506371	ADP-ribosylation factor-like protein 8	111.348	103.585	119.566	115.514	141.985	136.995	88.986	117.605	92.676	87.6671	114.597	101.507	86.428	89.0008	90.4488	86.7272	102.775	98.7297	104.172	102.715	102.08
118515297	ADP-ribosylation factor-like protein 8	115.298	75.4139	106.294	84.3884	76.5067	100.658	86.9795	79.6252	68.9586	78.8705	57.0415	76.9075	85.4574	75.1843	73.682	71.4125	74.5101	67.3468	88.4958	54.2621	72.9372
118507508	ADP-ribosylation factor-related protein 1	40.7627	37.455	30.4021	40.8084	36.7175	44.6047	43.8411	36.4309	37.8638	46.0678	42.0207	34.7548	40.7506	38.3766	34.0062	35.4064	32.4699	39.8657	42.0121	38.2751	36.4898
118511263	adrenodoxin-like protein 1, mitochondrial	27.3895	27.9413	27.3051	27.7043	27.5582	27.7665	24.7747	25.761	22.1954	21.0612	26.0937	23.7809	28.4629	23.2713	25.9927	25.6651	23.6882	25.4509	29.3972	25.1027	29.9704
118504816	adrenodoxin-like protein 2, mitochondrial	95.6619	89.9453	80.385	89.7869	72.6889	86.9082	80.6774	79.6614	89.0218	79.6694	85.0137	88.0405	79.9452	84.0487	81.6399	77.6963	78.4981	78.6373	83.1768	79.4365	83.2401
118509804	adult cuticle protein 1-like	55.3556	30.8371	101.637	152.307	16.7973	47.8956	1.39336	0	0	0.530462	0.336387	0	0	0	0.327073	0.269687	0	0.141333	0	0.346835	0.129131
118509855	adult cuticle protein 1-like	239.843	89.0616	184.704	675.223	101.015	127.272	0.402525	0	0.196775	0.817879	0.972216	0.219191	0	0	0.377526	0.155741	0.465864	0.163443	0.352169	0.402374	0.148913
118512970	adult cuticle protein 1-like	132.415	47.4885	126.092	263.355	45.7926	68.8035	0	0	0	0	0.384407	0	0	0	0	0	0	0	0	0.198808	0
118514306	adult cuticle protein 1-like	0.73104	0	0.212919	0.591294	0.506628	0.547679	0.406472	0	0	0.619426	0.58908	0	0	0.172425	0	0	0	0	0	0	0
118514308	adult cuticle protein 1-like	0	0	0	0	0	0	0	0	0	0	0	0	0	0	0	0	0	0	0	0	0
118514309	adult cuticle protein 1-like	0	0	0.105838	0.257453	6.20818e-07	0.453725	0	1.3169e-06	0	0	0	0.274736	0.171549	0	0	0	0	0	0	0	0.224229
118514310	adult cuticle protein 1-like	0	0	0	0.665348	0.339062	0	0	0.22697	0	0	0	0.556317	0	0	2.6194e-05	0	0	0.16571	0	0	0
118514311	adult cuticle protein 1-like	0	0	0.105838	0.257453	6.20818e-07	0.453725	0	1.3169e-06	0	0	0	0.274736	0.171549	0	0	0	0	0	0	0	0.224229
118514312	adult cuticle protein 1-like	0	0.638469	0	0.757599	0	0	7.31634e-07	0	0.239274	0	0	0	0	0	0	0.189331	0	0	0	0	0
118514313	adult cuticle protein 1-like	0	0	0	0.497169	0	0	0.247238	0	0	0	0	0	0	0	0	0	0	0	0	0	0
118514316	adult cuticle protein 1-like	7.37644	3.06172	20.9545	34.7073	11.7093	4.48134	0	0	0	0	0.284464	0	0	0	0	0	0	0.239499	0	0	0
118509264	adult cuticle protein 1-like, transcript variant X1	0.165684	0	0	0.264759	0	0.164854	0	0	0	0.0923935	0	0	0	0	0	0	0	0.0739725	0	0.1779	0
118509264	adult cuticle protein 1-like, transcript variant X2	28.892	17.1857	28.3303	20.2139	5.61876	13.4999	5.07005	0.626473	3.30489	1.43296	0.725422	2.04378	4.78587	0.956819	0.880982	3.05199	2.46196	14.7109	2.1349	5.62897	1.80782
118508583	adult enhancer factor 1-like	8.28161	8.04655	6.97922	8.31955	7.57584	9.23939	11.1176	10.2417	11.0784	11.6149	10.0553	9.01393	11.1956	10.2308	10.2077	12.2589	8.25225	12.4402	11.2479	10.2855	11.1581
118510894	adult-specific cuticular protein ACP-20-like	0	0	0.173705	0.120481	0	0	0	0	0	0	0	0	0	0	0	0	0	0.269031	0	0	0
118513061	adult-specific cuticular protein ACP-20-like	1.36398	2.13698	0.713821	1.10426	1.44079	2.92046	5.20309	4.10098	5.93437	6.16983	6.28432	2.83597	6.07158	3.67652	4.47166	3.52278	4.85301	3.34695	3.98472	3.69318	4.80574
118513062	adult-specific cuticular protein ACP-20-like	6.0035	7.31566	3.83752	6.42708	5.72752	6.77231	3.23184	3.35622	3.58104	4.16069	4.37179	6.57567	2.55983	3.28842	2.42413	6.33483	6.1528	3.50117	4.90249	2.80597	4.93784
118505576	AF4/FMR2 family member lilli, transcript variant X1	1.43416	0.618045	0	0.31301	0.35355	0.7716	0.795212	0.476812	0.390343	0	0	0	0.354258	0	0	0	0	0	0	0.38386	0
118510461	AF4/FMR2 family member lilli, transcript variant X1	0	0	0	0	0	0	0	0	0	0	0	0	0	0	0	0	0	0	0	0	0
118512657	AF4/FMR2 family member lilli, transcript variant X1	2.2752e-07	2.19453e-10	5.06985e-06	1.85446e-08	0	2.85064e-07	4.06021e-07	5.43091e-09	5.65619e-10	7.6967e-07	4.06102e-07	3.69901e-07	9.73284e-09	3.32365e-10	5.83792e-08	9.95307e-08	1.84653e-07	2.5617e-07	2.57958e-06	3.68786e-07	9.09026e-08
118510461	AF4/FMR2 family member lilli, transcript variant X10	5.66533	3.58523	9.08515	3.18301	11.2876	7.32751	11.643	16.1627	8.2534	10.6401	9.54964	8.42674	7.41985	10.2009	5.60591	9.91412	7.72827	12.4245	17.0904	11.6359	10.1882
118512657	AF4/FMR2 family member lilli, transcript variant X10	0	4.94962e-07	0.0108031	7.58156e-06	1.35115e-10	8.02922e-06	0.743004	1.03823	0	4.74243e-05	9.70263e-10	2.03125e-09	0.899329	0.577044	0.438631	2.07319e-10	0.655707	1.45555	3.559e-05	1.27797e-07	0.501491
118510461	AF4/FMR2 family member lilli, transcript variant X11	4.0335	7.33341	8.34771	3.40654	9.09578	7.05843	9.44	9.01942	7.15304	10.5921	6.24966	6.10059	5.05896	6.93853	7.46851	8.37535	10.6512	8.18738	3.69058	8.24394	3.28344
118512657	AF4/FMR2 family member lilli, transcript variant X11	8.31692e-07	1.05942e-09	0.866122	2.34904e-10	0	1.04626e-06	0.000224781	0.641295	1.65037e-09	6.79274e-09	5.20133e-08	1.66204e-07	0.630838	0.703767	0.541175	1.82922e-08	0.000124589	1.48406	3.47306e-06	0.998633	9.80966e-09
118510461	AF4/FMR2 family member lilli, transcript variant X12	3.26173	5.14749	5.49191	2.69194	5.50764	3.50225	6.12107	6.73967	3.47941	4.24613	5.2294	3.52359	4.624	5.06279	5.58081	2.57647	8.30208	4.96798	5.60545	3.20497	5.34197
118512657	AF4/FMR2 family member lilli, transcript variant X12	0.985156	1.05942e-09	2.90784e-06	1.08415	0	0.789227	2.07686	0.641295	2.25785	2.54777	8.83558e-08	1.14299	2.80836	2.53788	8.43368e-09	2.423	1.5778	1.92596	3.2143	0.998633	2.20358
118510461	AF4/FMR2 family member lilli, transcript variant X13	6.28336	3.81615	9.48996	6.07088	7.31548	3.49973	10.9791	7.23551	3.75177	4.81619	6.79322	8.52762	6.14423	7.50433	5.3485	5.55813	6.95054	10.9833	5.06973	5.4983	6.90012
118512657	AF4/FMR2 family member lilli, transcript variant X13	0	0.255226	0	0	0	0	0	0	0	0	0	0	0	0.223891	0	0.234727	0.222649	0	0	0	0
118510461	AF4/FMR2 family member lilli, transcript variant X14	0.343524	0	0.116623	0.501831	1.68972	0.384721	0.0657587	1.73759	0.00677538	3.053	1.14992	2.27456	1.08725	2.88926	0.168106	2.05732	3.48079	4.17461	0.56471	1.65997e-07	0.145381
118512657	AF4/FMR2 family member lilli, transcript variant X14	1.42631	0.468722	1.47962e-05	0.474319	1.68531	1.98659	2.36271	1.43344	0.622103	1.05143	2.2856	1.8331	5.25864	1.31302	0.64139	1.69534	2.38973	0.554329	2.48504	0.82566	1.95404
118510461	AF4/FMR2 family member lilli, transcript variant X15	0.631678	0	0.512066	1.66708	0.000127942	2.76706	2.10528	1.38404	0.950563	0.000276138	0.000505198	0.00856478	3.7392e-06	5.65964e-06	0.811361	0.451752	0.00148309	0.135747	0.000693332	0.251354	0.233378
118512657	AF4/FMR2 family member lilli, transcript variant X15	2.20363	2.02849	7.28302	2.97605	4.95878	3.73931	6.09915	4.63237	1.29189	7.65292	7.67526	6.05135	5.67415	6.6987	3.71118	5.85672	6.66679	4.04888	0.879217	7.7306	2.81093
118510461	AF4/FMR2 family member lilli, transcript variant X16	19.341	24.4723	33.9913	21.4593	23.3876	22.5835	33.2921	25.8828	22.7118	27.0746	24.172	23.5977	24.4885	18.5426	26.3873	15.7388	24.6464	22.3443	28.6402	29.9553	16.5516
118512657	AF4/FMR2 family member lilli, transcript variant X16	4.05002	5.08489	9.72101	4.46118	11.5627	4.65853	12.6423	18.821	7.02518	13.0881	9.66367	10.9493	3.73703	6.4403	12.2982	6.62533	14.2142	14.801	12.5866	6.66089	7.07002
118510461	AF4/FMR2 family member lilli, transcript variant X17	3.69902	2.19515	5.07136	4.60995	6.47914	6.52131	8.03285	14.6729	12.0789	8.35121	4.97004	9.23705	1.06076	6.64316	5.31259	4.48331	4.30656	9.76141	7.48109	7.5076	4.58683
118510461	AF4/FMR2 family member lilli, transcript variant X18	34.7054	28.4627	38.9501	35.9616	42.0811	30.0508	58.5253	50.3504	37.993	48.1351	53.6804	54.316	52.665	39.0135	32.022	38.036	53.0293	47.0494	45.0479	38.9907	37.7968
118510461	AF4/FMR2 family member lilli, transcript variant X19	13.4369	1.50372	7.31125	3.58468	5.71339	8.02713	10.6963	5.40754	10.5692	9.87485	12.0984	4.82839	12.0136	15.7443	12.6681	11.1055	10.3171	10.1977	15.2758	0.0478374	6.18802
118505576	AF4/FMR2 family member lilli, transcript variant X2	21.9724	24.4653	30.893	21.9187	24.605	20.9655	17.79	23.4755	20.891	24.494	21.2237	19.6528	23.733	21.3177	23.0246	24.7786	21.7028	20.5074	27.2953	23.2803	19.1986
118510461	AF4/FMR2 family member lilli, transcript variant X2	0.295545	0.109645	0.583449	0.248666	0.242559	0	0.52839	0.663693	0.46927	0.42238	0.126516	0.154396	0.807494	0.360594	0.127565	0.0941544	0.54238	0.281688	0.111225	0.114333	0.0900148
118512657	AF4/FMR2 family member lilli, transcript variant X2	0.000370157	1.31866	0.00140843	0.000205224	0.0137508	1.8883	0.463843	0.00301851	4.09086	1.44637	0.66339	0.0250812	5.81549e-05	0.000659808	1.49194	3.8102	0.442953	1.29941	1.95934e-06	0.813281	0.0774755
118510461	AF4/FMR2 family member lilli, transcript variant X20	1.72137	3.74074	6.12035	0.000129914	6.52448	0.00376115	4.92433	3.43783	2.47022	2.44244	0.899739	3.57384	3.13677	2.85514	5.37749	0.000285566	2.8487	0.000184848	2.89175	5.02924	1.04119
118510461	AF4/FMR2 family member lilli, transcript variant X21	3.27367	5.72803	7.36833	0.00225326	8.16392	5.12363	3.85289	0.0116381	5.63374	9.34611	3.23207	2.10081	3.57317	6.61144	7.30493	10.3086	11.1707	3.12981	4.36239	5.78242	0.00413144
118510461	AF4/FMR2 family member lilli, transcript variant X22	2.7209	6.90257	4.58795	5.65217	1.19243	6.97958	17.5929	19.0599	5.5556	4.73374	2.00248	5.99352	9.32534	3.79947	0.691818	13.3724	6.84632	23.2351	2.64486	11.1689	10.1429
118510461	AF4/FMR2 family member lilli, transcript variant X3	8.89191e-09	0	1.07927e-08	0	4.6745e-06	0	0.546041	0	0	0.136387	0.53438	0.15892	8.70862e-06	0.369324	0	0.303454	0.0953685	5.35556e-07	9.31734e-08	0.000455067	0
118512657	AF4/FMR2 family member lilli, transcript variant X3	0.762306	0	0.794008	1.47849	0.34726	0.00376353	1.51944	0.000975719	0.00244653	1.22751e-08	0.640592	1.20856	6.42628e-05	1.07416e-07	0.475325	2.57966e-09	0.42052	1.19541e-05	1.67285	0.689667	0.0188064
118510461	AF4/FMR2 family member lilli, transcript variant X4	0.216904	0	0	0.174517	0.129622	6.74371e-06	0.289652	3.02392e-06	0.126712	0	0.136488	0	0.248729	0.145123	0	0	0	0	8.18912e-06	0	0.188437
118512657	AF4/FMR2 family member lilli, transcript variant X4	0.520924	7.17518e-08	3.85657e-08	2.50649e-09	2.84903e-07	0.00428705	0.00263624	0.538904	0.0806635	1.17799	1.18507	0.271667	0.395068	0.580111	1.20973e-07	3.35452e-05	0.151056	0.00145167	1.25826	1.38114e-09	6.43645e-06
118510461	AF4/FMR2 family member lilli, transcript variant X5	0.10457	0	0	0.0824091	0.130498	0.130334	0	0.169607	0.235867	0.143138	0.272231	0.46944	0.126086	0.539166	0.700437	0.0956808	0.285907	0.296072	0.225893	0.231371	0
118512657	AF4/FMR2 family member lilli, transcript variant X5	1.42009e-06	0.959848	1.13581e-05	1.66048	1.22916	0.782524	1.45313	0.000140819	2.95262e-05	0.854762	0.0031242	2.10296	0.374669	1.67656	3.65898e-05	0.0111863	1.52998e-06	0.792888	0.000102712	1.60061	1.79869
118510461	AF4/FMR2 family member lilli, transcript variant X6	0	0	0	0	0	0	0	0.192481	0	0	0.150506	0	0.130678	0	0	0	0.194197	0	0	0.251104	0.106917
118512657	AF4/FMR2 family member lilli, transcript variant X6	0.00241039	0	2.11525e-05	0	0	0.00429828	2.62303e-06	0.300255	0.67721	3.83862e-05	1.48427e-07	0.00073227	0.877594	0.000203379	0	0	0.0878768	1.27843e-08	6.45639e-05	1.44956e-10	1.48021e-06
118510461	AF4/FMR2 family member lilli, transcript variant X7	0.13541	0	0.390203	0.11081	0.146268	0	0	0	0.145091	0	0	0	0.28149	0	0	0	0	0.110418	0.127397	0.260603	0
118512657	AF4/FMR2 family member lilli, transcript variant X7	0.537305	2.88355e-07	0.00641707	0.00072279	0	0.806539	0.00149421	1.33193	0.000244659	2.63915e-05	3.25141e-10	9.49827e-06	0.834164	0.775199	0	1.21754e-10	8.27448e-07	7.21595e-06	1.34851	7.25273e-08	0.445603
118510461	AF4/FMR2 family member lilli, transcript variant X8	4.7921e-09	0	0	0	0	0.139764	0	0.414975	0	0	0	0.395295	0	0	0	0	0	0	0.127057	0	0
118512657	AF4/FMR2 family member lilli, transcript variant X8	6.46474e-06	0	3.55234e-05	0	0	1.25315	3.77092e-10	6.79349e-07	4.79605e-08	6.8789e-05	0.697074	0.76749	3.97769e-05	1.83291e-07	0	0.301171	0.208812	0	0.465863	2.54742e-10	0
118510461	AF4/FMR2 family member lilli, transcript variant X9	0.000885285	1.95374	0.0729769	0.0290771	3.48186	0.05838	2.21057	2.17042	3.46373	4.44997	2.99139	0.707223	2.82144	1.29132	2.28242	2.30515	6.70808	0.443865	4.01549	7.98348	2.37575
118512657	AF4/FMR2 family member lilli, transcript variant X9	1.15171	0.00240352	2.98263e-09	6.33282e-05	7.11029e-06	0.00482862	0.805841	0.0115012	1.27115e-05	0.000142368	5.26359e-06	0.993258	1.01647	0.00316756	0.00292098	0.012817	0.531259	1.18304	1.69541e-05	7.66554e-05	0.154462
118513988	AF4/FMR2 family member lilli-like	5.93185	5.15468	9.42735	4.65162	8.99595	7.46186	70.591	73.014	55.9081	64.1818	44.1147	88.3085	39.9339	67.5088	45.9133	43.4515	92.35	39.5061	50.4984	109.669	23.9418
118503091	AF4/FMR2 family member lilli-like, transcript variant X1	0.627942	1.81947	0.872491	1.37792	2.62454	2.45515	1.45559	1.60256	0.506377	1.95975	0.559884	2.61038	1.68182	2.07527	1.56847	1.14221	3.91847	3.85478	2.53086	2.90629	2.88576
118505535	AF4/FMR2 family member lilli-like, transcript variant X1	0.000170969	3.93775e-05	1.20929e-06	8.64373e-07	2.71489e-07	5.3212e-07	5.18266e-07	1.48737e-05	8.15398e-07	2.96402e-07	1.37048e-06	2.28242e-06	1.44475e-06	3.26594e-06	2.71907e-06	1.71347e-06	2.29089e-06	7.75694e-07	1.47369e-06	9.77292e-07	2.42755e-06
118508431	AF4/FMR2 family member lilli-like, transcript variant X1	4.00087	4.18752	9.40786	3.68776	8.90953	6.19308	4.57801	4.71307	2.3176	3.46719	1.63537	2.55771	3.12718	3.10614	2.63315	1.67224	3.30275	2.61126	3.7115	2.08961	4.73147
118513483	AF4/FMR2 family member lilli-like, transcript variant X1	0	0	0	0	0	0	0	0	0	0	0	0	0	0	0	0	0	0	0	0	0
118503091	AF4/FMR2 family member lilli-like, transcript variant X2	0.960382	0.509191	0	0.281475	0.662018	0.401785	0.937123	0.426273	0.717128	0.705044	0	0.555412	1.22429	0.841101	1.4645	0.782179	0.629682	0.375034	0.649001	0.521263	0.919939
118505535	AF4/FMR2 family member lilli-like, transcript variant X2	4.45917	2.88746	8.2043	5.05371	5.79051	3.77371	9.47581	11.3532	5.80598	11.451	7.51361	8.78548	8.72257	8.13526	6.83407	6.07115	11.2446	8.78866	6.33743	5.71122	3.57941
118508431	AF4/FMR2 family member lilli-like, transcript variant X2	2.91785e-05	1.50952e-07	0.106096	0.00799915	0.0211643	1.87647	0.000616994	8.1356e-09	1.6648	0.66062	4.90399e-06	0	1.0574	2.61261	4.25615	3.38399	2.31653	0.0016152	3.81713e-05	1.07114	0.0069882
118513483	AF4/FMR2 family member lilli-like, transcript variant X2	1.50785	0.352331	1.12459	0	0.634605	0.871816	0.598416	1.62795	0.954103	0.329863	0.637968	0.692777	0.651244	0.280089	1.00092	0.703235	0.289197	0.490663	0.640672	0.280158	0
118503091	AF4/FMR2 family member lilli-like, transcript variant X3	0.0918453	0.0925215	0	0.146602	0.084438	0.278936	0.184806	0.55203	0	0.191386	0.0931201	0.297078	0.438916	0.14854	0.254887	0.232422	0.150569	0.424435	0.0930883	0.348156	0.155204
118505535	AF4/FMR2 family member lilli-like, transcript variant X3	0.738406	0.717632	2.13292	0.590054	0.678824	1.43875	1.62723	2.23219	0.399744	2.03201	1.96182	1.29899	0.698457	1.03142	1.53713	1.56717	1.87995	0.648135	2.45544	1.96165	1.21057
118508431	AF4/FMR2 family member lilli-like, transcript variant X3	3.68496	4.03314	3.39826	5.5389	6.03433	3.21509	4.09892	5.4603	4.17547	5.455	8.64384	6.2595	5.33316	4.03554	3.48753	3.66524	4.08915	7.36168	8.42101	7.39745	7.35209
118513483	AF4/FMR2 family member lilli-like, transcript variant X3	10.0436	12.3583	20.5583	11.8493	27.8127	12.5569	30.6621	22.0783	16.2971	22.1061	14.5098	26.2924	14.2898	24.6993	21.0572	19.1786	25.4718	19.1077	15.7193	22.1343	19.1747
118503091	AF4/FMR2 family member lilli-like, transcript variant X4	3.68925	5.07973	6.18439	3.64887	5.20377	5.8553	13.9421	14.7981	11.177	11.5983	10.6559	9.60644	11.5669	11.249	9.17273	10.0936	11.1091	9.73194	12.1566	12.3801	9.02397
118505535	AF4/FMR2 family member lilli-like, transcript variant X4	4.39955	5.15295	8.73239	4.68755	11.6153	9.20402	17.6509	17.5527	11.4815	12.5824	10.0706	17.679	13.7649	13.5222	14.3252	11.633	18.4773	15.4165	7.90768	19.1416	9.28283
118508431	AF4/FMR2 family member lilli-like, transcript variant X4	3.84375	3.45975	5.71828	6.51844	7.303	4.61114	4.43479	3.94271	1.92019	4.2125	3.74327	2.92053	4.67927	4.27384	2.84607	3.52803	3.39325	5.52774	4.05652	2.9939	2.16245
118513483	AF4/FMR2 family member lilli-like, transcript variant X4	17.5683	12.8578	23.1319	17.624	24.5928	24.486	35.3058	36.9088	24.4065	28.9797	27.7928	22.813	30.4769	18.0047	23.3221	19.155	25.7019	39.9406	32.3235	31.9131	21.8023
118503091	AF4/FMR2 family member lilli-like, transcript variant X5	9.08445	10.3761	12.6192	9.27774	12.4186	7.17752	23.0926	20.0311	18.2439	20.1697	19.1074	16.7008	18.3106	17.9582	17.433	15.1383	18.1547	20.329	16.9616	18.474	13.8816
118505535	AF4/FMR2 family member lilli-like, transcript variant X5	0.534443	0.627295	1.26986	0.658827	0.840059	0.35625	0.754573	0.654126	0.814681	0.886856	0.714498	1.31187	0.698493	1.77855	0.600691	0.753686	1.31997	0.963372	0.975917	1.15428	1.05032
118513483	AF4/FMR2 family member lilli-like, transcript variant X5	4.16489	3.41548	3.18575	1.30066	0.977277	0.00109989	5.65413	3.42205	2.75432	4.70746	4.08742	1.81344	1.60197	1.56705	1.35585	4.47132	2.87676	1.71505	6.27923	6.3123	4.97876
118505535	AF4/FMR2 family member lilli-like, transcript variant X6	0	0.0938764	0	0	0.128254	0.126166	0	0.228035	0	0	0.194744	0.155144	0.105253	0	0.127379	0.0651522	0	0	0	0	0
118513483	AF4/FMR2 family member lilli-like, transcript variant X6	2.6995	2.87203	4.76596	3.45844	7.78399	4.90716	4.28819	3.00319	2.09396	3.22423	3.63941	3.57169	3.89531	5.59934	3.35588	3.36956	5.35372	6.95918	4.95848	4.92614	4.12182
118505535	AF4/FMR2 family member lilli-like, transcript variant X7	4.12342	4.65609	3.78765	3.10813	4.63025	3.78575	8.44533	4.21298	8.70527	6.04433	7.20925	7.67588	5.5312	9.74356	9.12718	7.43283	10.0184	12.341	15.7801	11.3813	8.05883
118513483	AF4/FMR2 family member lilli-like, transcript variant X7	1.37971	1.93783	1.65227	2.44056	2.13885	1.48069	2.83635	4.41528	5.12287	4.06794	2.39494	1.87273	1.96022	2.76525	4.07115	1.08523	1.95418	2.29926	2.79032	2.19352	3.2304
118513483	AF4/FMR2 family member lilli-like, transcript variant X8	2.33169	2.68876	7.42152	3.70596	2.47073	3.12855	8.50553	8.82111	6.76197	5.1274	5.17424	9.19385	2.22117	7.0415	5.56711	6.07019	5.94947	3.42083	7.27098	8.87128	6.45018
118513483	AF4/FMR2 family member lilli-like, transcript variant X9	33.5096	36.7631	60.4199	37.161	68.2218	48.9847	56.249	62.35	37.7043	56.4815	50.727	56.1244	52.9296	49.8599	47.509	47.1232	63.6702	54.9067	73.0095	56.7358	38.0432
118505300	afadin, transcript variant X1	0.156302	0	0.247812	0	0.148054	0.0985959	0.0426555	0.102967	0.0430253	0.0430114	0.209346	0	0.039738	0.0776025	0.128021	0.102714	0.164764	0.136937	0.0387424	0.123784	0.109419
118505300	afadin, transcript variant X10	0.736959	0.78943	1.90173	0.645915	1.70791	1.00303	0.909762	1.65822	0.236481	0.538131	0.518743	0.796408	1.13814	1.13259	0.580675	1.21578	0.765138	0.352805	1.00429	0.298516	0.917812
118505300	afadin, transcript variant X11	5.41102	8.74114	12.8572	6.67763	13.8898	8.72637	13.387	15.7479	10.0559	15.9158	13.1826	10.6126	12.4199	13.3639	13.7549	10.7448	16.8631	13.0457	11.5677	12.2737	8.41079
118505300	afadin, transcript variant X12	0.744886	0.319585	0.771487	0.692184	1.51974	0.38593	1.88992	1.64002	1.19359	1.11973	0.785699	2.42281	1.24056	1.60084	1.45856	0.942761	0.852346	1.83901	1.37492	2.71532	1.13608
118505300	afadin, transcript variant X2	0	0.0670385	0.367285	0.271651	0.889759	0.429124	0	0.211878	0.0567445	0.0581551	0.167287	0.127987	0.0541947	0.159114	0	0	0.0434796	0.0461199	0.052728	0	0.202804
118505300	afadin, transcript variant X3	0.439069	0.198043	1.50928	0.321211	1.39259	0.350623	0.168064	0.415549	0.0558969	0.171404	0.219499	0.0629776	0.319409	0.104084	0	0.165398	0.156325	0.227234	0.674728	0.108299	0.598648
118505300	afadin, transcript variant X4	0	0	0	0	0	0	0	0	0	0	0	0	0	0	0	0	0	0	0	0	0
118505300	afadin, transcript variant X5	0	3.97736e-07	0.264278	0.0754033	0.918782	0.119765	0.0788913	0.292647	0	0	0	0	0	0.076031	0.0785442	0.0872168	0.0827958	0	0.292399	0	0.140933
118505300	afadin, transcript variant X6	22.7507	22.9143	39.161	23.533	50.2425	26.8235	29.9229	33.6629	19.2867	24.4028	28.0327	24.9092	31.432	26.6612	24.8301	24.6209	30.1897	29.9108	34.5177	26.2606	30.3099
118505300	afadin, transcript variant X7	0.311801	0.412988	0.677875	0.300766	1.1786	0.588168	0	0.051728	0.12951	0	0.167911	0.191924	0.120106	0.156	0.300154	0.0342009	0.0989063	0.170749	0.0387192	0.124043	0.146109
118505300	afadin, transcript variant X8	1.35824	1.24673	3.21313	1.583	5.3025	2.46665	2.13078	3.5254	0.820154	0.929921	2.33036	2.26367	2.00112	1.83365	1.67726	1.51792	2.53417	1.61285	2.24691	1.67002	1.99541
118505300	afadin, transcript variant X9	0	0	0	0	0	0	0	0	0	0	0	0	0	0	0	0	0	0	0	0	0
118514222	AFG3-like protein 2	64.5865	58.2294	95.7982	59.6094	78.8547	69.9161	66.2988	75.7079	51.4586	59.0414	56.4565	59.8944	63.7446	64.0655	64.2382	61.1456	68.4597	58.6345	75.513	69.581	60.7306
118509463	agglutinin-like protein ARB_02240	0	0	0	0	0	0	0	0	0	0	0	0	0	0	0	0	0	0	0	0	0
118514322	agrin, transcript variant X1	20.4964	22.8399	21.0665	27.0096	25.5108	22.9579	23.895	20.5096	22.4979	22.7045	22.1136	23.4003	30.3395	29.2665	31.3165	31.0352	35.6537	29.931	20.8008	23.4207	17.4851
118514322	agrin, transcript variant X2	0	0	0	0	0	0	0.314816	0	0.806437	0	0	0	0	0.376789	0	0	0	0.414901	0	0	0
118517510	AH receptor-interacting protein	40.6305	35.8097	42.7631	46.3833	55.1911	48.6112	47.6757	56.4662	49.9291	61.5181	54.7133	52.2476	56.877	55.7247	59.4037	55.0883	53.3665	52.3662	67.6335	60.2217	57.8577
118504548	A-kinase anchor protein 1, mitochondrial, transcript variant X1	42.382	40.8214	41.9618	45.4712	45.2701	44.8865	53.4378	50.0188	48.8663	56.127	58.1268	54.0501	69.0034	60.6121	61.1236	59.0705	52.5169	65.8119	66.4109	53.7395	58.3734
118504548	A-kinase anchor protein 1, mitochondrial, transcript variant X2	0	1.04788	0	0	0.526601	1.00141	3.27487	1.62953	0.833337	3.80403	1.4397	2.17713	1.92888	1.97584	1.07131	1.24313	1.75398	1.3566	2.23868	2.13132	2.58206
118514094	A-kinase anchor protein 10, mitochondrial, transcript variant X1	19.7469	18.9662	21.4562	17.4766	20.1775	20.4679	23.8051	24.2612	18.52	25.2566	25.8784	25.3783	25.9994	26.1265	23.9294	22.6942	24.0731	22.949	27.6253	25.1832	23.1518
118514094	A-kinase anchor protein 10, mitochondrial, transcript variant X2	2.18394	0	1.5883	3.9087	1.31783	2.90614	3.48194	5.5292	5.13977	1.65373	2.59589	2.09829	4.40498	2.08243	3.1685	1.9082	2.66481	2.63314	2.7141	1.48632	3.48471
118502773	A-kinase anchor protein 17A, transcript variant X1	13.5134	16.965	25.8934	14.791	27.7913	16.1968	28.9973	28.2045	24.2168	27.7973	28.1524	25.7722	26.041	24.5435	26.5537	23.4892	26.7121	36.6932	29.859	29.1656	23.4864
118502773	A-kinase anchor protein 17A, transcript variant X2	10.5673	14.9702	12.4941	11.1166	13.0453	13.0392	32.3945	31.0522	19.8619	21.3593	22.1565	24.5318	26.7915	24.3767	22.1414	18.2873	23.2373	16.35	25.7971	23.9662	14.4683
118513493	akirin, transcript variant X1	25.9448	24.0365	24.4656	26.7777	31.6383	24.318	29.9795	24.826	27.9479	20.3831	23.5706	17.6961	20.7956	21.8575	29.9807	15.6732	22.7978	26.7441	15.9602	21.7183	21.8824
118513493	akirin, transcript variant X10	0.845745	1.67282	2.96124	1.80321	2.45853	0	3.66071	2.83289	0	0	0.862969	3.66409	1.47171	1.71467	2.84782	0.733391	1.48364	3.88769	6.67382	0.925424	0.699147
118513493	akirin, transcript variant X11	3.75951	4.56408	5.78526	4.6583	7.82226	1.64219	6.0108	2.7326	5.08014	7.65915	3.09698	3.23451	4.50243	6.3554	4.60354	3.4754	3.23369	3.10076	2.33933	0.73736	0
118513493	akirin, transcript variant X12	1.55485	1.39493	2.31361	2.44481	2.59283	1.64825	4.09722	1.90528	4.09462	2.96081	1.61666	1.72252	3.68124	3.22089	3.81577	2.86604	2.25881	1.83239	0.529226	1.57861	2.16627
118513493	akirin, transcript variant X13	0.0360322	0.000668922	0.0138551	0.0167927	0.000172183	0.301755	0.0425746	0.0300497	0.15808	0.0505873	0.0112666	0.00158646	0.00122152	4.94113e-06	7.00083e-05	0.653328	0.0752616	3.26488	0.287102	0.00192935	0.059814
118513493	akirin, transcript variant X14	7.24098	0.004092	11.5383	12.7972	10.1047	0.688756	0.101509	11.2619	0.368562	0.122057	0.0253209	4.40076	8.63712	7.99598	0.000153629	15.4226	7.2506	8.81216	2.64852	10.4491	9.43682
118513493	akirin, transcript variant X15	0.0798701	0.004092	5.78429	0.151109	2.79613	0.688756	0.101509	0.217474	0.368562	0.122057	0.0253209	4.40076	0.0105281	1.44574e-06	0.000153629	1.45289	0.167517	0.0138684	2.64852	0.0169676	0.383026
118513493	akirin, transcript variant X16	3.35784	2.2275	3.93223	0.76808	2.28561	0	3.61197	3.64501	1.28049	5.25407	3.38268	4.71555	3.79718	4.15174	0.887411	5.84157	6.95155	2.45958	3.33667	1.23284	0.923688
118513493	akirin, transcript variant X17	1.34567	5.17207	3.24618	0.0481083	0.000411425	0.688756	0.367386	0.0967507	11.0368	8.62489	0.377286	0.0908004	0.114252	1.63861e-05	0.00138161	3.28491	6.35241	0.0107588	2.48726	9.27298	1.37303
118513493	akirin, transcript variant X18	0.0798701	0.00150528	0.0303019	0.0481083	0.000411425	0.688756	0.101509	0.0967507	0.786341	0.262221	0.0253209	4.40076	0.00386878	3.35651e-06	0.000153629	3.65384	0.379498	0.0541826	0.965309	0.00680544	0.1311
118513493	akirin, transcript variant X19	11.1513	1.39211	5.72222	5.61478	2.49952	2.35933	4.47683	4.56035	2.3708	4.55626	3.66093	3.51234	2.84949	5.69379	6.18579	1.93594	3.26855	2.88865	4.47254	3.31117	1.57789
118513493	akirin, transcript variant X2	11.7553	14.7225	7.5952	13.9409	12.5718	10.8491	15.7327	16.9967	13.9252	16.0511	14.8549	15.11	15.0922	13.232	19.7563	16.6001	10.2787	17.7699	15.2059	10.2074	13.9457
118513493	akirin, transcript variant X20	0.0612532	0.00114863	0.0233431	0.0369693	0.000307725	0.523082	0.075979	0.074338	0.592981	0.195494	0.0193297	0.00268049	1.76368	1.11492e-06	0.000118215	1.11303	0.128294	8.01156	0.727862	0.00512176	0.10092
118513493	akirin, transcript variant X21	0.0612532	0.00312246	0.0233431	0.116121	0.000307725	0.523082	0.075979	0.167095	0.277933	0.0909972	0.0193297	0.00268049	0.00808322	1.11492e-06	0.000118215	1.11303	0.128294	0.0103846	1.99704	0.0127698	0.294852
118513493	akirin, transcript variant X22	0.0612532	0.00114863	5.4946	0.0369693	0.000307725	0.523082	0.075979	0.074338	0.592981	0.195494	11.3465	0.00268049	1.76368	1.11492e-06	0.000118215	1.11303	0.128294	0.00805616	0.727862	0.00512176	6.17282
118513493	akirin, transcript variant X3	4.87888	7.20919	12.1012	2.29139	11.3093	9.39122	9.29388	7.71356	9.29936	6.81967	13.1188	4.11672	6.1302	11.4513	2.76119	9.00741	13.6166	7.79116	6.24635	11.4823	6.57352
118513493	akirin, transcript variant X4	15.1053	16.4185	10.1687	8.4609	12.8236	14.724	8.21277	7.38972	13.2432	5.93486	6.78934	6.43329	5.03274	10.9989	8.57247	6.61476	5.639	11.2103	6.29703	7.38806	9.04896
118513493	akirin, transcript variant X5	5.10874	5.44926	1.05199	6.90954	2.0136	4.10776	2.96698	1.1429	1.08998	3.83354	2.94271	3.29017	3.8981	0.656538	5.2065	4.19904	7.29156	2.22212e-10	3.70207	1.94803	7.82671e-09
118513493	akirin, transcript variant X6	10.3517	10.3527	8.93942	11.2148	11.8486	11.7303	9.58681	12.6889	9.77005	14.5611	5.26805	12.9021	9.52751	9.30359	12.8111	2.95551	20.5891	17.9215	15.7153	14.9545	8.70382
118513493	akirin, transcript variant X7	5.9312	9.10065	8.50968	8.05292	7.59563	7.7843	3.51117	8.49905	5.94805	8.45669	7.92433	5.31769	3.33537	3.17976	2.67913	5.08979	1.73743	7.75566	3.1334	6.58592	4.15035
118513493	akirin, transcript variant X8	0	2.04098	1.67864	1.23223	6.33789	0.835853	1.7465	6.71062	3.44449	1.73033	1.57302	4.10298	0	1.07204	1.33334	2.82933	2.62988	2.59008	1.65661	1.55101	0.662012
118513493	akirin, transcript variant X9	2.21776	4.57451	1.19145	3.42477	0	5.07576	6.44118	2.71866	1.37103e-09	1.30478	5.62331e-09	1.14158	0.920262	2.85441	0.901593	1.11435	1.99849e-09	0.968693	1.67028e-09	1.06022	9.95839e-10
118509913	alanine and glycine-rich protein-like	8.34618	9.82406	20.7754	11.8098	32.1164	19.6236	24.8511	23.6627	9.70735	27.8899	21.8191	24.39	20.0463	15.7814	15.2907	15.3726	15.4854	17.9033	23.2338	14.9236	13.5756
118508962	alanine--tRNA ligase, cytoplasmic, transcript variant X1	32.2135	34.4933	43.4842	32.8327	38.3679	35.9996	29.5188	39.2672	26.1137	30.8921	34.6722	33.6197	47.4043	38.3666	40.6113	33.5434	36.7619	36.4612	39.9904	33.2601	33.7412
118508962	alanine--tRNA ligase, cytoplasmic, transcript variant X2	0	0	0.533094	0	2.54944	2.40854	0	0	0.972214	1.31817	1.36623	0.876587	0	0.658573	2.56148	1.88431	0	2.35567	0.696866	0	1.64185
118508962	alanine--tRNA ligase, cytoplasmic, transcript variant X3	0.863503	0	0	0	0	0	0	0	0	0	0.739062	0	0	0	0	2.06179	0.697227	0	0.761655	2.4049	0
118510409	alanine--tRNA ligase, mitochondrial	3.80177	4.08587	5.22777	3.74275	4.41576	4.06449	4.19582	3.97688	2.86991	4.07531	3.58319	3.34139	5.83408	4.72884	5.41918	4.76696	4.3184	4.32178	5.02713	4.71224	4.96352
118506787	alanyl-tRNA editing protein Aarsd1-A	30.3294	31.8179	28.0604	33.0735	28.2989	36.6713	33.0766	35.2231	33.061	36.2314	32.9823	36.2292	39.0655	38.1206	39.304	41.8798	38.074	34.8022	41.5709	35.5547	37.5908
118514214	alcohol dehydrogenase 1-like, transcript variant X1	7.35582	5.63435	6.54371	6.74856	6.67035	7.1893	6.10129	11.0984	9.04568	9.13952	11.522	11.23	12.6585	9.55607	12.1659	9.63748	7.90465	7.2971	9.7595	8.79717	9.86631
118514214	alcohol dehydrogenase 1-like, transcript variant X2	7.38457	6.98603	5.71361	6.12881	6.55655	6.7222	7.68093	5.99907	8.58651	8.76095	8.67214	8.79293	9.01629	8.73848	8.30626	9.45781	8.79021	9.19371	10.6266	9.55385	8.26281
118514214	alcohol dehydrogenase 1-like, transcript variant X3	0.605772	0	0	0.997394	0.948679	0	4.38847	0	0.640749	1.552	0	0.808006	0.568248	1.21358	0	1.20172	0.601939	1.75591	1.87893	0.758564	1.75999
118514214	alcohol dehydrogenase 1-like, transcript variant X4	0.706683	0.550017	0.760394	0.825737	0.302774	0.374638	0.466086	0.172735	0.101919	0.314264	0.399458	0.222563	0.312108	0.224048	0.294033	0	0.0398763	0.461692	0.416528	0.501621	0.23565
118506014	alcohol dehydrogenase class-3	19.5354	17.9661	22.0535	19.781	21.1532	21.0658	24.8313	23.5758	25.217	33.4203	30.1852	31.4987	28.7273	28.4406	29.3172	26.8139	24.3508	20.7885	30.6825	40.704	44.633
118509675	aldehyde dehydrogenase family 3 member B1, transcript variant X1	1.23297	5.82547	2.90352	0.000334938	1.88109e-05	3.83925	0	0	5.99187e-07	2.64092e-06	4.8938e-06	0	0.00297233	1.39375e-05	0.651135	0	3.44726e-08	0.000455117	0	0.848124	0
118509675	aldehyde dehydrogenase family 3 member B1, transcript variant X10	1.65987	0	4.09134	3.39634	1.62051	1.62456	1.21987	0	0	1.85346	2.20107	2.23087	1.85444	2.1523	0	0.768971	1.71664	2.06434	0	0	0
118509675	aldehyde dehydrogenase family 3 member B1, transcript variant X11	1.16775	2.65266	0.218348	0.104856	2.69449	6.08175	11.7411	7.3161	10.1604	3.15633	5.96281	8.67361	7.49214	3.93374	8.20517	2.96251	8.84625	5.23637	4.6688	6.6172	6.87411
118509675	aldehyde dehydrogenase family 3 member B1, transcript variant X12	0.390516	1.00005	0	0	0	0	0	0.390183	0	0.551248	0	0	0	0	0	0	0	0	0	0	0
118509675	aldehyde dehydrogenase family 3 member B1, transcript variant X13	4.39198e-05	0	1.67761e-08	0.0481157	0.00246217	1.09994	0	0	0	1.32294e-09	0	0	1.58964e-08	0	7.96959e-08	0	0	0	0	1.75505e-07	0
118509675	aldehyde dehydrogenase family 3 member B1, transcript variant X14	2.22556e-06	0	3.30656e-09	0.0251388	9.16316e-08	1.01831	6.09561	5.36801	4.28029	4.31507	0.884007	3.1812	7.24522	3.40496	5.77815	4.30492	2.48509	1.43055	1.55481	3.19396	5.15232
118509675	aldehyde dehydrogenase family 3 member B1, transcript variant X15	3.63287e-06	0	0	0.00849024	4.45608e-08	0.204883	0	0	0	8.39891e-10	0	0	7.7683e-09	0	1.65553e-08	0	0	0	0	2.6889e-08	0
118509675	aldehyde dehydrogenase family 3 member B1, transcript variant X16	0.215624	0.0391392	2.54537	4.24766e-09	0	0.0311888	19.777	13.6265	15.0365	11.3345	13.156	15.0599	8.723	17.3305	17.6033	13.6461	20.3044	11.8426	17.9708	7.55068	16.1067
118509675	aldehyde dehydrogenase family 3 member B1, transcript variant X17	2.89935e-06	1.10376e-05	3.76438	0	0.00045007	0	0	0	0	1.70816	0	0	0	0.405175	5.30895	6.23431e-08	0.000180427	4.19508	0	1.97788	0
118509675	aldehyde dehydrogenase family 3 member B1, transcript variant X18	6.85405	4.5063	2.40337	6.55075	2.66182	2.87813	0	4.22309	4.84163	5.11317	3.438	1.66562	4.12487	4.2651	2.29423	2.77219	4.16785	7.29845	6.56605	4.7002	3.83824
118509675	aldehyde dehydrogenase family 3 member B1, transcript variant X19	1.40771	5.75219	2.96275	0.933577	3.46155	4.35567	0	0.00105581	4.45964	1.58364	7.30858	3.23505	2.98074	6.26387	3.92068	5.57324	0.300513	7.02533	1.46187	7.40053	2.65303e-08
118509675	aldehyde dehydrogenase family 3 member B1, transcript variant X2	0.740484	0.632277	0.366205	0.813616	1.95258	3.79956	0	0	1.33998e-07	1.09523e-08	0	0	4.68668e-07	9.00135e-10	8.78645e-06	0	0	0	0	1.21733e-05	0
118509675	aldehyde dehydrogenase family 3 member B1, transcript variant X20	1.02395	0.00261519	0.938063	1.35144	0.000910593	7.26882	10.3904	14.7835	8.46072	9.57413	10.6646	9.3195	11.2707	6.15964	6.58224	6.65072	8.99345	12.836	8.35835	11.1372	10.0926
118509675	aldehyde dehydrogenase family 3 member B1, transcript variant X21	52.9331	43.7479	44.3176	47.1768	53.5126	55.545	29.8019	25.6512	31.5035	33.599	38.0631	36.1668	46.7759	43.697	43.8045	52.3566	37.8299	46.0601	32.9382	52.3276	41.7793
118509675	aldehyde dehydrogenase family 3 member B1, transcript variant X22	0.00723611	0	8.70083e-07	3.51125	0.0251825	3.45807	0	0	1.33824e-08	2.87596e-08	0	0	2.22406e-07	0	3.68135e-07	0	0	0	0	1.96518e-07	0
118509675	aldehyde dehydrogenase family 3 member B1, transcript variant X23	0	0	0	0	0	1.42714	0.000126273	0	0	1.20283	0	0	0	1.24802	0.951434	0	1.48901	1.22348	0	0	5.20217e-09
118509675	aldehyde dehydrogenase family 3 member B1, transcript variant X24	1.00673e-07	0	2.16771e-08	0.128551	0	0.104453	1.94387	0	3.11962e-09	0	0	1.42167	1.10222e-07	1.27426	0	0	0	0	0	3.42034e-08	0
118509675	aldehyde dehydrogenase family 3 member B1, transcript variant X25	0	0.029436	0	0	2.10982	0	0	0	0	1.79736e-07	0	0	0	0.90615	0.000192445	1.08802	2.38467	4.78031e-06	0	2.83374e-06	1.47488
118509675	aldehyde dehydrogenase family 3 member B1, transcript variant X26	21.4054	16.7316	17.5783	17.5523	15.7602	11.5519	6.59314	4.8435	1.18631	3.23387	9.22214e-06	0.519813	4.90176	0.0161667	2.58646	2.88782	1.3862	0.874155	5.49314	0.34687	5.10454
118509675	aldehyde dehydrogenase family 3 member B1, transcript variant X27	3.467	3.52422	2.64195e-06	2.63431	6.68726e-09	3.32424	3.01169	3.07191	2.54159	2.23023	5.48515	1.68656	3.42559	2.81776	1.49886	3.20277	3.27429	6.24255	4.58024	2.16289	0.0213801
118509675	aldehyde dehydrogenase family 3 member B1, transcript variant X28	0	1.38947	1.5374	0	1.37644	0.515007	0	2.38028	0.85546	0	1.05454	0	1.8994	1.72704	3.08123	2.7608	0	0.525563	0	0	0.49976
118509675	aldehyde dehydrogenase family 3 member B1, transcript variant X29	1.21997	0.97753	1.2347	1.69491	0	1.022	0.517254	0	0	0.712955	1.15677	0	0.919856	1.6912	1.14547	0	0	0	1.7598	0	1.2513
118509675	aldehyde dehydrogenase family 3 member B1, transcript variant X3	5.24667	1.58499	6.86511	6.04475	7.18567	2.1117	0	0.000592932	0.778508	0.028359	1.96244	1.15725	0.339366	1.10716	1.69095	0.510666	0.00168484	2.07797	1.15989	0.745194	7.62193e-07
118509675	aldehyde dehydrogenase family 3 member B1, transcript variant X4	7.33496	6.86927	2.10984	2.88021	4.45646	0.699001	0	0	3.38924e-08	5.70881e-09	0	0	2.12328e-07	0	2.02137e-06	0	0	0	0	2.46803e-06	0
118509675	aldehyde dehydrogenase family 3 member B1, transcript variant X5	7.15453e-06	0.58303	0.0014688	1.02781e-07	4.66722e-07	0.00193404	0	0	3.78801e-05	0	8.54558e-08	1.11963e-08	0.000255001	2.4924e-08	4.84426e-08	8.81765e-09	4.87713e-07	1.86537e-08	0	3.25262e-09	0
118509675	aldehyde dehydrogenase family 3 member B1, transcript variant X6	6.05498	1.72015	1.65824	7.21176	6.41324	8.27166	0	0	2.65331e-07	1.07854e-07	0	0	3.47357e-06	0	2.28224e-05	0	0	0	0	5.15753e-06	0
118509675	aldehyde dehydrogenase family 3 member B1, transcript variant X7	0.00154877	5.85245e-05	2.06196e-05	0.0113083	2.87513e-09	1.81086	0.733106	2.14484	0.676199	1.6469	0.707425	0.655994	1.23653	0.0321233	2.01959e-07	1.51337	2.43845	0.367738	0	0.213991	1.62751
118509675	aldehyde dehydrogenase family 3 member B1, transcript variant X8	0.0873259	1.33676	4.9975	6.44904	0.00253833	0.411121	0	0	6.81509e-08	2.28125e-09	0	0.24159	1.53272e-06	0.306632	0	0	0	0	0	1.06996e-06	0
118509675	aldehyde dehydrogenase family 3 member B1, transcript variant X9	0.000503684	0	1.79172	3.57945	0	0.000538024	0	0	0	0.0612043	0	0	0	2.99922e-09	0.00197055	0	0	6.51521e-10	0.00313112	0.0127269	0
118504718	aldehyde dehydrogenase X, mitochondrial-like	49.8256	50.9931	45.4865	57.3059	46.7174	52.218	40.806	44.3074	47.1608	53.8304	51.6434	49.2138	125.074	113.18	149.544	148.037	136.851	116.916	73.2899	75.2236	71.0861
118507569	aldehyde dehydrogenase, mitochondrial, transcript variant X1	31.032	25.2578	29.1273	28.1092	31.0681	33.0829	53.1914	47.1681	54.5793	54.9303	48.9165	44.9558	54.7887	49.4545	47.2127	48.7869	49.2896	46.7919	47.5735	62.8417	51.6788
118507569	aldehyde dehydrogenase, mitochondrial, transcript variant X2	22.6133	26.7453	25.2897	25.2569	23.7796	28.1164	49.8094	60.9558	71.1472	49.6931	65.4849	63.4198	44.2321	44.223	49.0952	43.1577	38.0038	39.7524	50.8035	49.4949	66.7439
118507569	aldehyde dehydrogenase, mitochondrial, transcript variant X3	12.1718	10.0044	5.67983	8.85665	6.92833	5.17634	9.89321	14.234	13.0214	13.072	9.25093	11.6043	10.7489	16.0339	13.9861	9.7702	11.3609	8.15155	14.1142	17.1309	17.0846
118511754	alkaline ceramidase	85.3117	84.0515	71.1425	77.5269	75.9386	74.995	76.1931	69.4532	69.6037	59.6754	64.5503	57.985	58.0182	54.6464	61.1796	61.9242	55.037	63.4358	52.6431	55.0908	60.3129
118505202	alkaline phosphatase	1.08416	1.00472	0.570626	1.14564	1.22495	0.834439	0.816576	0.847403	0.480736	2.09578	2.25848	2.64744	1.07149	1.07429	1.23192	0.677642	0.922678	1.01517	1.28627	2.51014	3.26689
118506107	alkaline phosphatase 4-like	15.5458	17.4389	19.2328	18.6801	19.4877	20.5518	12.5132	15.0412	17.3442	20.2112	20.9221	25.4758	16.0375	15.3213	15.6717	14.15	10.3236	8.60276	16.9086	15.4055	14.6372
118508213	alkaline phosphatase, tissue-nonspecific isozyme-like	0.120725	0.351536	0.069931	0.387392	0.111179	0.300688	0.600474	0.37092	0.392661	1.01411	0.321883	0.793681	0.969956	0.857849	0.251536	0.518786	0.257022	0.811461	0.350278	1.50771	1.04969
118509032	alkaline phosphatase, tissue-nonspecific isozyme-like	0	0	0.0526885	0	0	0.0453262	0	0	0	0.15276	0	0.108617	0.0430247	0.0431412	0	0.0391125	0	0.0407529	0	0.0492873	0
118507492	alkaline phosphatase-like	0	0	0.129615	0	0	0	0.247318	0.206241	0.0606551	0.125295	0	0	0	0	0.0582847	0	0	0.0501317	0.0541036	0	0
118517598	alkaline phosphatase-like	0.228738	0.166525	0.198718	0.229325	0.210631	0.398772	0.252785	0.351333	0.123987	0.128067	0.365854	0.204988	0.324325	0.054185	0.476563	0.0491468	0.194756	0.15372	0.387092	0.124129	0.284178
118517599	alkaline phosphatase-like	0	0.0480972	0.0573659	0.0794303	0.091219	0.0986905	0.164184	0.121701	0.268494	0.110891	0.158407	0.236583	0.187334	0	0.0516027	0.127732	0.295141	0.133118	0.239464	0	0.123156
118517600	alkaline phosphatase-like	0.0857952	0.249918	0.248289	0.0687488	0.197428	0.170887	0.142117	0.368705	0.232454	0.095976	0.182814	0.153527	0.283892	0.325347	0.0446783	0.036867	0.182475	0.0384078	0.37313	0.0928707	0.213368
118508065	alkylated DNA repair protein alkB homolog 8	6.35967	6.82779	6.05355	7.95191	7.95132	7.91711	7.17264	8.33567	8.81013	10.3961	9.94556	7.6781	12.4401	9.83353	10.7692	10.5305	8.49657	10.932	10.8441	10.094	9.97054
118507906	alkyldihydroxyacetonephosphate synthase, transcript variant X1	6.67506	5.20817	7.69354	5.36865	3.31722	7.88505	6.20055	7.30277	7.2519	6.96503	5.26087	9.12983	11.9514	11.5233	15.1331	7.1784	13.8286	10.5398	6.69254	6.76598	5.86401
118507906	alkyldihydroxyacetonephosphate synthase, transcript variant X2	0.623014	7.54969e-10	0	2.65736e-09	3.31584	0.866667	0	1.01565	0	0.900738	0.743467	0	1.46428	2.48475	0	0	0	1.11007	1.0537	0	1.82957
118507906	alkyldihydroxyacetonephosphate synthase, transcript variant X3	6.68403	7.26722	5.01058	4.10386	6.59811	3.06076	6.11713	5.33884	2.88226	4.56538	5.8599	2.35554	3.24467	3.06473	4.31081	5.76691	5.36659	2.5423	3.84794	8.00693	3.77368
118507906	alkyldihydroxyacetonephosphate synthase, transcript variant X4	8.39985	8.11122	13.9327	9.41569	11.3798	10.1379	9.40876	9.0904	11.0748	7.85309	7.13879	11.795	12.438	9.54339	7.21748	10.1611	10.4827	10.5636	11.6657	10.7757	6.82531
118507906	alkyldihydroxyacetonephosphate synthase, transcript variant X5	0	0.641773	0.513648	0	0	0	2.24489	0.503803	0.427393	0	0.670395	0.543719	0.436299	1.02693	0	0	0	0.339918	1.07127	0.588405	0.527919
118506932	allantoinase	0.0529088	0.154088	0.122549	0.0848479	0.146143	0.15811	3.39057	1.42996	3.21177	3.02064	4.17378	4.29692	0.20006	0.200565	0.440903	0.363774	0.225188	0.236988	1.79043	6.54115	4.29566
118507559	allatostatin-A receptor, transcript variant X1	9.08012	9.63193	8.39384	11.4918	13.4072	10.3911	10.2373	13.9853	14.811	16.8064	14.0599	15.8768	11.1379	12.3557	12.0895	9.67539	13.3311	12.3861	14.9184	16.9709	10.909
118507559	allatostatin-A receptor, transcript variant X10	0	1.55509	0.572101	0.395569	2.48321	0.589069	0	0.799008	0.653628	0.994495	0.601103	2.91911	0	2.11443	1.62312	0.836182	0.804868	0	0.354915	1.09562	0
118507559	allatostatin-A receptor, transcript variant X11	0.412478	0.41358	1.36772	1.12032	0.869467	0.925047	0.485562	0.485793	0.969943	1.01854	1.02662	1.07865	0	0	0	0.751874	0.37858	0.911274	0	0.936464	0.359371
118507559	allatostatin-A receptor, transcript variant X12	5.68107	5.02501	7.28435	9.38343	5.68039	5.42083	8.35421	9.60488	8.67072	6.87292	8.92299	8.50102	8.85509	8.22781	6.33707	6.46642	9.47815	9.40301	9.07587	7.33335	10.9461
118507559	allatostatin-A receptor, transcript variant X13	0.498869	0	0	0	1.44618	0	0.61714	0	0	0.547472	0	0.770366	0	0.663331	0	0	0	1.08426	0	0	0
118507559	allatostatin-A receptor, transcript variant X2	1.3222	4.67965	4.4453	3.92053	5.7024	3.02139	4.75639	5.32044	3.1882	4.05765	6.77807	8.03161	2.96383	4.63911	5.89302	5.7467	6.3047	4.11448	4.02657	3.44654	1.77342
118507559	allatostatin-A receptor, transcript variant X3	0.849994	0.538753	1.16495	0.24441	0.391108	0.720492	0.486205	0.343655	0.691231	0.991565	2.10811	1.17376	0.85251	0	0.506349	1.33152	0.748795	0.659781	0.432195	0	0
118507559	allatostatin-A receptor, transcript variant X4	6.34936	4.17372	7.16928	4.69387	7.90695	2.48214	3.07045	2.53884	2.0678	4.30689	2.52682	3.65696	1.62887	3.33045	3.47842	2.73661	2.69512	2.73433	2.19877	3.24383	2.27932
118507559	allatostatin-A receptor, transcript variant X5	0	0	1.72995	0.399968	0	0.490181	1.45305	7.40796e-05	0	1.5017	1.13509	0	0.420908	1.77797	0.666055	0	1.62842	9.3036e-10	0	0	0.536649
118507559	allatostatin-A receptor, transcript variant X6	1.45696	2.22805	3.27413	3.08109	1.87443	4.50405	3.90316	4.06839	1.09671	3.55284	1.6813	1.02948	0.858573	2.09539	4.82772	4.29709	1.60155	2.98885	1.62806	5.65217e-05	0
118507559	allatostatin-A receptor, transcript variant X7	1.92371	1.18938	1.96351	0	1.53598	2.50275	2.6004	0	1.91766	0	1.61775	3.19178	1.56924	1.1774	0.663395	0.570414	1.44135	3.31739	0	2.1089	0.379653
118507559	allatostatin-A receptor, transcript variant X8	3.28819	1.5133	1.11153	0.886801	0	1.40677	2.48672	2.34405	2.0549	2.3167	2.64417	3.65627	5.56557	1.29002	0.000340045	0.988646	3.64547	3.17725	1.33104	1.65078	0.812983
118507559	allatostatin-A receptor, transcript variant X9	0	0.866618	0	1.2673	0	0.637562	3.14552	0	0	0	0	0	0.756676	0.569328	0	0	1.71417	1.09431	0.372521	1.75869	0.790724
118504450	allatostatin-A receptor-like	47.8545	43.0275	52.3873	45.18	48.312	51.9652	41.1051	44.2248	33.9331	44.6116	43.2836	49.6722	40.078	36.3698	34.8479	35.2829	37.1809	37.9786	40.6235	32.125	37.4968
118513621	alpha,alpha-trehalose-phosphate synthase [UDP-forming]	10.4203	6.15074	7.68579	10.3312	10.5057	9.96492	40.3132	18.3167	27.287	18.3828	14.3185	18.6677	5.26731	3.87302	3.86729	1.94374	2.07745	2.55851	6.71509	20.0265	27.933
118517404	alpha-(1,3)-fucosyltransferase C	2.92844	3.42797	2.97162	2.21762	2.54761	3.27581	4.16363	5.7129	4.869	4.397	4.95699	4.40146	5.42357	4.64025	5.05528	3.7234	4.02648	2.72927	3.79905	3.51553	4.72305
118506626	alpha-(1,6)-fucosyltransferase	119.329	134.925	125.607	118.337	136.926	106.074	184.816	221.587	208.768	165.721	226.295	185.754	217.622	228.869	209.586	199.93	187.461	184.128	186.149	147.617	176.415
118504889	alpha/beta hydrolase domain-containing protein 17B-like	15.1744	20.214	33.8088	14.4412	35.1916	23.5035	41.7633	50.6643	26.9759	35.1327	33.4172	34.2979	39.661	40.9514	34.5609	31.0992	45.2048	35.5146	39.6354	39.9713	28.9729
[truncated: 29,878 more rows]

## Sheet: 2. genes_brain_no isoforms
geneID	gene name	D0_males_R1	D0_males_R2	D0_males_R3	D0_females_R1	D0_females_R2	D0_females_R3	D5_males_R1	D5_males_R2	D5_males_R3	D5_virgin_females_R1	D5_virgin_females_R2	D5_virgin_females_R3	D1PBM_virgin_R1	D1PBM_virgin_R2	D1PBM_virgin_R3	D1PBM_mated_R1	D1PBM_mated_R2	D1PBM_mated_R3	D1PO_R1	D1PO_R2	D1PO_R3
[truncated: 14,838 more rows]

[truncated: 2 more sheets: 3.Candidates, 4. genes_ovary_gut_fatbody]
